# Supplementary material for: Inheritance Beyond Plain Heritability: Variance-Controlling Genes in Arabidopsis thaliana
Source: PubMed Central journal article supplement (PMC3410891; doi:10.1371/journal.pgen.1002839), 2012-08-02
Supplement: pgen.1002839.s001.pdf [file pgen.1002839.s001.pdf]

# SUPPORTING INFORMATION S1

This document contains the supplementary materials of the paper "*Inheritance beyond plain heritability: variance controlling genes in Arabidopsis thaliana*". There are 5 parts:

1. **Details of the quantitative variance dissection**
2. **Supplementary Tables and Figures A\*** - descriptions and analytical results.
3. **Supplementary Figures B\*** - figures of GWAS and vGWAS results for each studied trait.

The horizontal dashed lines correspond to a nominal 5% significance threshold with Bonferroni correction.

4. **Supplementary Tables** - tables of scores and ranks from GWASs and vGWASs of the candidate genes suggested in Atwell et al. (2010) *Nature*.
5. **Tutorial** of the **R package vGWAS** together with its **documentation**.

## Details of the quantitative variance dissection

In the **Methods** section of the paper, we dissect the phenotypic variance into the variance due to the mean shift between genotypes,  $V_M$ , the variance due to the variance heterogeneity,  $V_V$ , and the remaining residual variance  $V_R$ , *i.e.*

$$V_P = V_M + V_V + V_R$$

Here, we give detailed derivations of these quantities and the related properties.  $H/L$  here denotes the high/low-variance allele (HA/LA), respectively, and we assume an additive model for the standard deviation per genotype.

| Genotype ( $X$ ) | Frequency   | Genotypic Value ( $G$ ) | Genotypic S.D. ( $S$ )     |
|------------------|-------------|-------------------------|----------------------------|
| $LL$             | $p$         | $\mu_L = \mu$           | $\sigma_L = \sigma$        |
| $HH$             | $q = 1 - p$ | $\mu_H = \mu + \alpha$  | $\sigma_H = \sigma + \phi$ |

$V_M$  is here the phenotypic variance explained by  $G$  and identical to  $V_A$ .

$$\begin{aligned} \text{Var}(G) &= E[G^2] - E^2[G] \\ &= p\mu^2 + q(\mu + \alpha)^2 - [p\mu + q(\mu + \alpha)]^2 \\ &= pq\alpha^2 \\ &\equiv pq(\mu_H - \mu_L)^2 \end{aligned}$$

Similarly,  $V_V$  is measured as the variance of  $S$ ,

$$\begin{aligned} \text{Var}(S) &= E[S^2] - E^2[S] \\ &= p\sigma^2 + q(\sigma + \phi)^2 - [p\sigma + q(\sigma + \phi)]^2 \\ &= pq\phi^2 \\ &\equiv pq(\sigma_H - \sigma_L)^2 \end{aligned}$$

The total variance of the phenotype  $P$  can be derived as

$$\begin{aligned} \text{Var}(P) &= \text{Var}(E[P|X]) + E[\text{Var}(P|X)] \\ &= \text{Var}(G) + E[S^2] \\ &= pq\alpha^2 + p\sigma^2 + q(\sigma + \phi)^2 \\ &= pq\alpha^2 + pq\phi^2 + (\sigma + q\phi)^2 \\ &\equiv pq(\mu_H - \mu_L)^2 + pq(\sigma_H - \sigma_L)^2 + (p\sigma_L + q\sigma_H)^2 \end{aligned}$$

where  $pq(\mu_H - \mu_L)^2 = V_M$ ,  $pq(\sigma_H - \sigma_L)^2 = V_V$ , and  $(p\sigma_L + q\sigma_H)^2 = V_R$ . The proportion of  $V_P$  due to variance heterogeneity is thus

$$\frac{V_V}{V_P} = \frac{pq\phi^2}{pq\alpha^2 + p\sigma^2 + q(\sigma + \phi)^2}$$

The mean environmental variance is  $V_E = V_V + V_R = p\sigma^2 + q(\sigma + \phi)^2$ . Here, we investigate important properties of  $V_V/V_P$ .  $V_V/V_P$  as a measurement of the proportion explained by the genetically controlled difference in the environmental variance, has the following essential properties:

**Unit free:** The value of  $V_V/V_P$  does not change with the choice of measurement unit, *i.e.* it does not change if the trait is measured in centimeters versus meters or grams versus kilograms.

**Between 0 and  $V_E/V_P$ :** From our derivations, we have  $0 < V_V/V_P < V_E/V_P < 1$ .

**Bounded by  $H^2$ :** The value of  $V_V/V_P$  does not exceed the broad sense heritability  $H^2$  when the underlying cause of variance heterogeneity is an epistatic interaction (**Supplementary Figure A5**).

**Has an asymptote of LAF:** When the shift in variance goes to infinity, namely,  $\phi \rightarrow \infty$ , we have  $V_V/V_P \rightarrow pq/q = p$ , which is the low-variance allele frequency (LAF).

**Maximized when LAF  $> 1/2$ :** Regarding  $V_M/V_P$  and  $V_V/V_P$  as functions of  $p$ , the roots of

$$\frac{\partial}{\partial p} \frac{V_M}{V_P} = 0, \quad 0 \leq p \leq 1$$

and

$$\frac{\partial}{\partial p} \frac{V_V}{V_P} = 0, \quad 0 \leq p \leq 1$$

are the same, *i.e.*

$$p = \frac{\sigma + \phi}{2\sigma + \phi} \equiv \frac{\sigma_H}{\sigma_L + \sigma_H}$$

At this frequency of the low-variance allele, both  $V_M/V_P$  and  $V_V/V_P$  attain their maxima,

$$\max_p \left( \frac{V_M}{V_P} \right) = \frac{\alpha^2}{\alpha^2 + (2\sigma + \phi)^2} \equiv \frac{(\mu_H - \mu_L)^2}{(\mu_H - \mu_L)^2 + (\sigma_L + \sigma_H)^2}$$

and

$$\max_p \left( \frac{V_V}{V_P} \right) = \frac{\phi^2}{\alpha^2 + (2\sigma + \phi)^2} \equiv \frac{(\sigma_H - \sigma_L)^2}{(\mu_H - \mu_L)^2 + (\sigma_L + \sigma_H)^2}$$

If no variance heterogeneity exists,  $\phi = 0$ ,  $V_M/V_P$  is maximized at  $p = 1/2$ .

**Supplementary Table A1: Quantitative phenotypes analyzed.**Refer to Atwell *et al.* (2010) for further details about phenotype description and scoring.

| Phenotype         | ID | Type          | Sample size | Description                                                                          | Growth Conditions                                                                                 |
|-------------------|----|---------------|-------------|--------------------------------------------------------------------------------------|---------------------------------------------------------------------------------------------------|
| LD                | 1  | Flowering     | 167         | Days to flowering time (FT) under Long Day (LD) and Short Day(SD) +/- vernalization. | 18°C, 16 hrs daylight.                                                                            |
| LDV               | 2  | Flowering     | 168         |                                                                                      | 18°C, 16 hrs daylight, vernalized (5 wks, 4°C)                                                    |
| SD                | 3  | Flowering     | 162         |                                                                                      | 18°C, 8 hrs daylight.                                                                             |
| SDV               | 4  | Flowering     | 159         |                                                                                      | 18°C, 8 hrs daylight, vernalized (5 wks, 4°C)                                                     |
| FT10              | 5  | Flowering     | 194         | Flowering time (FT)                                                                  | 10°C, 16 hrs daylight.                                                                            |
| FT16              | 6  | Flowering     | 193         |                                                                                      | 16°C, 16 hrs daylight.                                                                            |
| FT22              | 7  | Flowering     | 193         |                                                                                      | 22°C, 16 hrs daylight.                                                                            |
| Seed Dormancy     | 8  | Developmental | 83          | Seed dormancy level.                                                                 | Seeds stored in cellulose paper bags and kept in a dark incubator at 20°C, 40% relative humidity. |
| Lithium (Li7)     | 14 | Ionomics      | 93          | <i>In planta</i> ion concentration.                                                  | 20°C, 16 hrs daylight.                                                                            |
| Boron (B11)       | 15 | Ionomics      | 93          |                                                                                      |                                                                                                   |
| Sodium (Na23)     | 16 | Ionomics      | 93          |                                                                                      |                                                                                                   |
| Magnesium (Mg25)  | 17 | Ionomics      | 93          |                                                                                      |                                                                                                   |
| Phosphorus (P31)  | 18 | Ionomics      | 93          |                                                                                      |                                                                                                   |
| Sulfur (S34)      | 19 | Ionomics      | 93          |                                                                                      |                                                                                                   |
| Potassium (K39)   | 20 | Ionomics      | 93          |                                                                                      |                                                                                                   |
| Calcium (Ca43)    | 21 | Ionomics      | 93          |                                                                                      |                                                                                                   |
| Manganese (Mn55)  | 22 | Ionomics      | 93          |                                                                                      |                                                                                                   |
| Iron (Fe56)       | 23 | Ionomics      | 93          |                                                                                      |                                                                                                   |
| Cobalt (Co59)     | 24 | Ionomics      | 93          |                                                                                      |                                                                                                   |
| Nickel (Ni60)     | 25 | Ionomics      | 93          |                                                                                      |                                                                                                   |
| Copper (Cu65)     | 26 | Ionomics      | 93          |                                                                                      |                                                                                                   |
| Zinc (Zn66)       | 27 | Ionomics      | 93          |                                                                                      |                                                                                                   |
| Arsenic (As75)    | 28 | Ionomics      | 93          |                                                                                      |                                                                                                   |
| Selenium (Se82)   | 29 | Ionomics      | 93          |                                                                                      |                                                                                                   |
| Molybdenum (Mo98) | 30 | Ionomics      | 93          |                                                                                      |                                                                                                   |
| Cadmium (Cd114)   | 31 | Ionomics      | 93          |                                                                                      |                                                                                                   |



| Phenotype         | ID | Type          | Sample size | Description                                     | Growth Conditions                                                                                                |
|-------------------|----|---------------|-------------|-------------------------------------------------|------------------------------------------------------------------------------------------------------------------|
| 0W                | 39 | Flowering     | 137         | Days to FT under LD with varying vernalization. | 23°C, 16 hrs daylight. Not vernalized.                                                                           |
| 2W                | 40 | Flowering     | 152         |                                                 | 23°C, 16 hrs daylight, vernalized (2 wks, 5°C, 8 hrs daylight).                                                  |
| 4W                | 41 | Flowering     | 119         |                                                 | 23°C, 16 hrs daylight, vernalized (4 wks, 5°C, 8 hrs daylight).                                                  |
| 8W                | 42 | Flowering     | 155         |                                                 | 23°C, 16 hrs daylight, vernalized (8 wks, 5°C, 8 hrs daylight).                                                  |
| FLC               | 43 | Flowering     | 167         | FLC and FRI gene expression.                    | Growth in greenhouse, ~20-22°C, 16 hrs daylight.                                                                 |
| FRI               | 44 | Flowering     | 164         |                                                 |                                                                                                                  |
| 8W GH FT          | 45 | Flowering     | 162         | Days to FT and LN at FT.                        | 20-22°C, natural light from the middle of October 2002 till March 2003, vernalized (8 wks, 4°C, 8 hrs daylight). |
| 8W GH LN          | 46 | Flowering     | 163         |                                                 |                                                                                                                  |
| 0W GH FT          | 47 | Flowering     | 153         |                                                 | 20-22°C, natural light from the middle of October 2002 till March 2003.                                          |
| 0W GH LN          | 48 | Flowering     | 135         |                                                 |                                                                                                                  |
| FT Field          | 57 | Flowering     | 180         | Days to flowering of plants grown in the field. | Growth in field or greenhouse (20°C, 16 hrs daylight), started in October.                                       |
| FT Diameter Field | 58 | Flowering     | 180         | Plant diameter at flowering (field).            |                                                                                                                  |
| FT GH             | 59 | Flowering     | 166         | Days to flowering (greenhouse).                 |                                                                                                                  |
| FT Duration GH    | 60 | Developmental | 147         | Flowering period duration.                      | Growth in greenhouse, 20°C, 16 hrs daylight.                                                                     |
| LC Duration GH    | 61 | Developmental | 147         | Life cycle period.                              |                                                                                                                  |
| LFS GH            | 62 | Developmental | 148         | Last flower senescence.                         |                                                                                                                  |
| MT GH             | 63 | Developmental | 147         | Maturation period.                              |                                                                                                                  |
| RP GH             | 64 | Developmental | 147         | Reproduction period.                            |                                                                                                                  |
| At1               | 65 |               | 175         |                                                 |                                                                                                                  |
| At1 CFU2          | 66 |               | 175         |                                                 |                                                                                                                  |
| As                | 67 |               | 175         |                                                 |                                                                                                                  |
| As CFU2           | 68 |               | 175         |                                                 |                                                                                                                  |
| Bs                | 69 |               | 175         |                                                 |                                                                                                                  |

| Phenotype        | ID  | Type            | Sample size | Description                         | Growth Conditions                                                                                                                                                                                                                                                                   |
|------------------|-----|-----------------|-------------|-------------------------------------|-------------------------------------------------------------------------------------------------------------------------------------------------------------------------------------------------------------------------------------------------------------------------------------|
| Bs CFU2          | 70  |                 | 175         |                                     |                                                                                                                                                                                                                                                                                     |
| At2              | 71  |                 | 175         |                                     |                                                                                                                                                                                                                                                                                     |
| At2 CFU2         | 72  |                 | 175         |                                     |                                                                                                                                                                                                                                                                                     |
| As2              | 73  |                 | 175         |                                     |                                                                                                                                                                                                                                                                                     |
| As2 CFU2         | 74  |                 | 175         |                                     |                                                                                                                                                                                                                                                                                     |
| FW               | 75  | Developmental   | 95          | Fresh weight of plants.             | Plants were grown for 7 weeks at 23°C.                                                                                                                                                                                                                                              |
| DW               | 76  | Developmental   | 95          | Dry weight of plants.               |                                                                                                                                                                                                                                                                                     |
| LN10             | 80  | Flowering       | 177         | Leaf number at flowering time (LN). | 10°C, 16 hrs daylight.                                                                                                                                                                                                                                                              |
| LN16             | 81  | Flowering       | 176         |                                     | 16°C, 16 hrs daylight.                                                                                                                                                                                                                                                              |
| LN22             | 82  | Flowering       | 176         |                                     | 22°C, 16 hrs daylight.                                                                                                                                                                                                                                                              |
| Silique 16       | 158 | Developmental   | 95          | Silique length.                     | 16°C, 16 hrs daylight.                                                                                                                                                                                                                                                              |
| Silique 22       | 159 | Developmental   | 95          |                                     | 22°C, 16 hrs daylight.                                                                                                                                                                                                                                                              |
| Germ 22          | 163 | Flowering       | 177         | Days to germination.                | Stratified for 3 days at 4°C in the dark, followed by growth at 22°C with 16 hrs daylight.                                                                                                                                                                                          |
| Width 10         | 164 | Developmental   | 176         | Plant diameter.                     | 10°C, 16 hrs daylight.                                                                                                                                                                                                                                                              |
| Width 16         | 165 | Developmental   | 175         |                                     | 16°C, 16 hrs daylight.                                                                                                                                                                                                                                                              |
| Width 22         | 166 | Developmental   | 175         |                                     | 22°C, 16 hrs daylight.                                                                                                                                                                                                                                                              |
| Leaf serr 10     | 173 | Developmental   | 174         | Level of leaf serration.            | 10°C, 16 hrs daylight.                                                                                                                                                                                                                                                              |
| Leaf serr 16     | 174 | Developmental   | 176         |                                     | 16°C, 16 hrs daylight.                                                                                                                                                                                                                                                              |
| Leaf serr 22     | 175 | Developmental   | 176         |                                     | 22°C, 16 hrs daylight.                                                                                                                                                                                                                                                              |
| Hypocotyl length | 182 | Developmental   | 89          | Hypocotyl length.                   | Seeds were vapor sterilized, plated in a random design on 1/2 MS agar plates (-sucrose), stratified for 4 days at 4°C in the dark, before transferring to photocycles (12 h 100 $\mu$ E/m <sup>2</sup> s cool white light / 12 hours dark) and thermocycles (12 h 22°C / 12 h 12°C) |
| Trichome avg C   | 183 | Defense-related | 94          | Trichome density.                   | 20°C, 12 hrs daylight.                                                                                                                                                                                                                                                              |
| Trichome avg JA  | 184 | Defense-related | 94          |                                     |                                                                                                                                                                                                                                                                                     |
| Aphid number     | 185 | Defense-related | 95          | Aphid offspring.                    | 20°C, 12 hrs daylight.                                                                                                                                                                                                                                                              |

| Phenotype          | ID  | Type          | Sample size | Description                                                                | Growth Conditions                                                                                                                                                                   |
|--------------------|-----|---------------|-------------|----------------------------------------------------------------------------|-------------------------------------------------------------------------------------------------------------------------------------------------------------------------------------|
| Bacterial titer    | 186 | Flowering     | 95          | Bacterial titers of <i>Pseudomonas syringae</i> pv. <i>tomato</i> DC3000.  | 20°C, 12 hrs daylight.                                                                                                                                                              |
| Seedling Growth    | 272 | Developmental | 101         | Seedling growth rate.                                                      | Seeds were grown for one week in the greenhouse under long day (16 hours light).                                                                                                    |
| Vern Growth        | 273 | Developmental | 111         | Vegetative growth rate during vernalization.                               | Seeds were grown for one week in the greenhouse under long day (16 hours light), vernalized for 4 weeks (4°C, 16h light, 50% relative humidity).                                    |
| After Vern Growth  | 274 | Developmental | 111         | Vegetative growth rate after vernalization.                                | Seeds were grown for one week in the greenhouse under long day (16 hours light), vernalized for 4 weeks (4°C, 16 hrs light, 50% relative humidity) and then returned to greenhouse. |
| Secondary Dormancy | 277 | Developmental | 94          | Decrease in germination rate after prolonged exposure to cold temperature. | Fully after-ripened seeds were treated with a 1 and 6-week long exposure to 4°C.                                                                                                    |
| Germ in dark       | 278 | Developmental | 94          | Germination in the dark.                                                   | 4°C, in the dark.                                                                                                                                                                   |
| DSDS50             | 279 | Developmental | 110         | Duration of seed dry storage required for 50% of the seeds to germinate.   | Dry storage, followed by 25°C, 12 hrs day, 20°C, 12 hrs night for 1 week.                                                                                                           |
| Seed bank 133-91   | 280 | Developmental | 111         | Non-monotonous dynamic of dormancy release.                                | Between 91 and 133 days of dry storage.                                                                                                                                             |
| Storage 7 days     | 281 | Developmental | 111         | Primary dormancy.                                                          | 7 days dry storage.                                                                                                                                                                 |
| Storage 28 days    | 282 | Developmental | 111         |                                                                            | 28 days dry storage.                                                                                                                                                                |
| Storage 56 days    | 283 | Developmental | 111         |                                                                            | 56 days dry storage.                                                                                                                                                                |

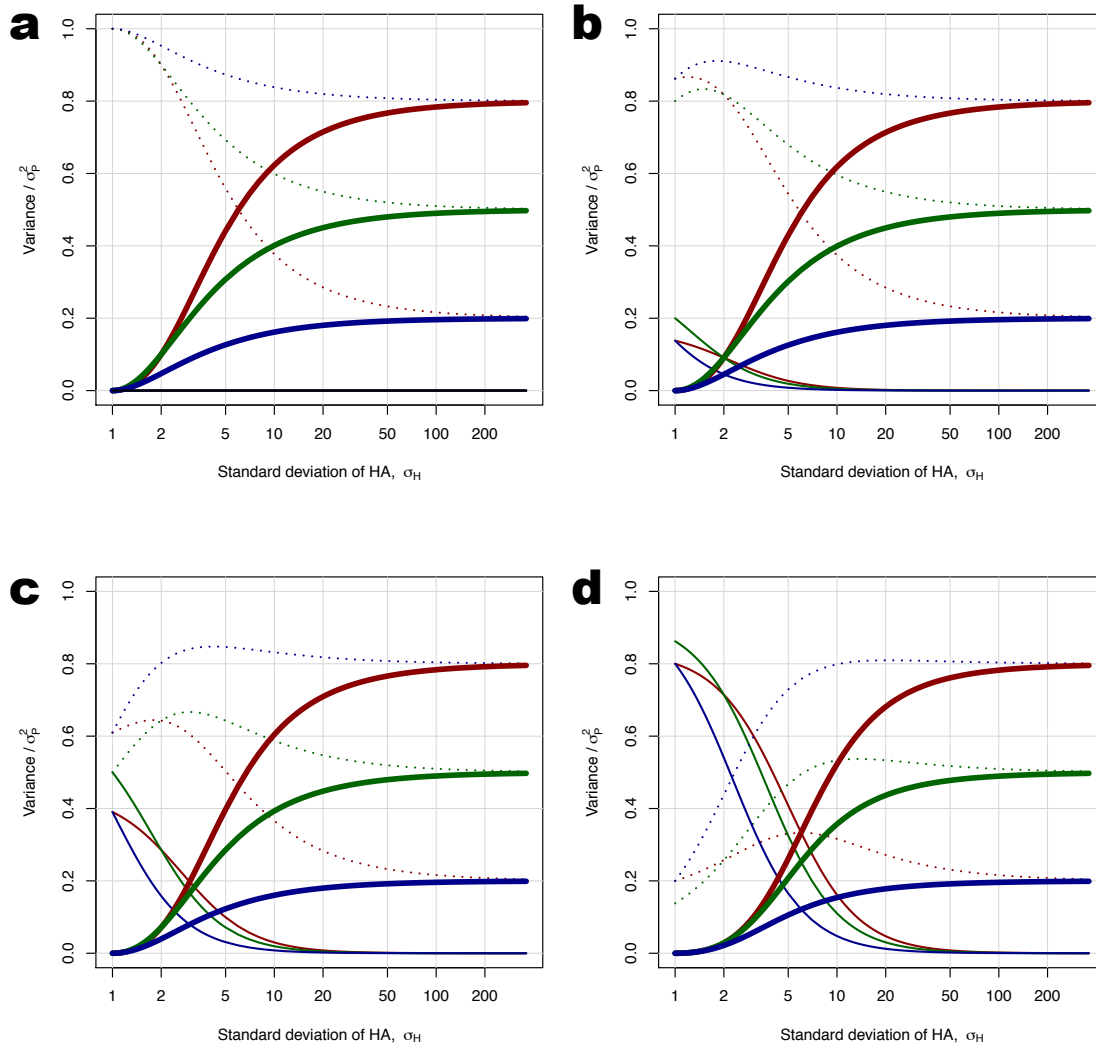

**Supplementary Figure A1: Dissection of the phenotypic variance with respect to the level of variance heterogeneity.** The standard deviation of the low-variance allele (LA) was set to 1. The additive effect was set to be 0 (**a**), 1 (**b**), 2 (**c**) and 5 (**d**). The red, green and blue colors correspond to low-variance allele frequencies 0.8, 0.5 and 0.2. The phenotypic variance  $V_P$  is dissected into variance due to mean shift,  $V_M$  ( $= V_A$ , thin solid lines), variance due to variance heterogeneity between genotypes,  $V_V$  (bold solid lines) and residual variance  $V_R$  (dotted lines).

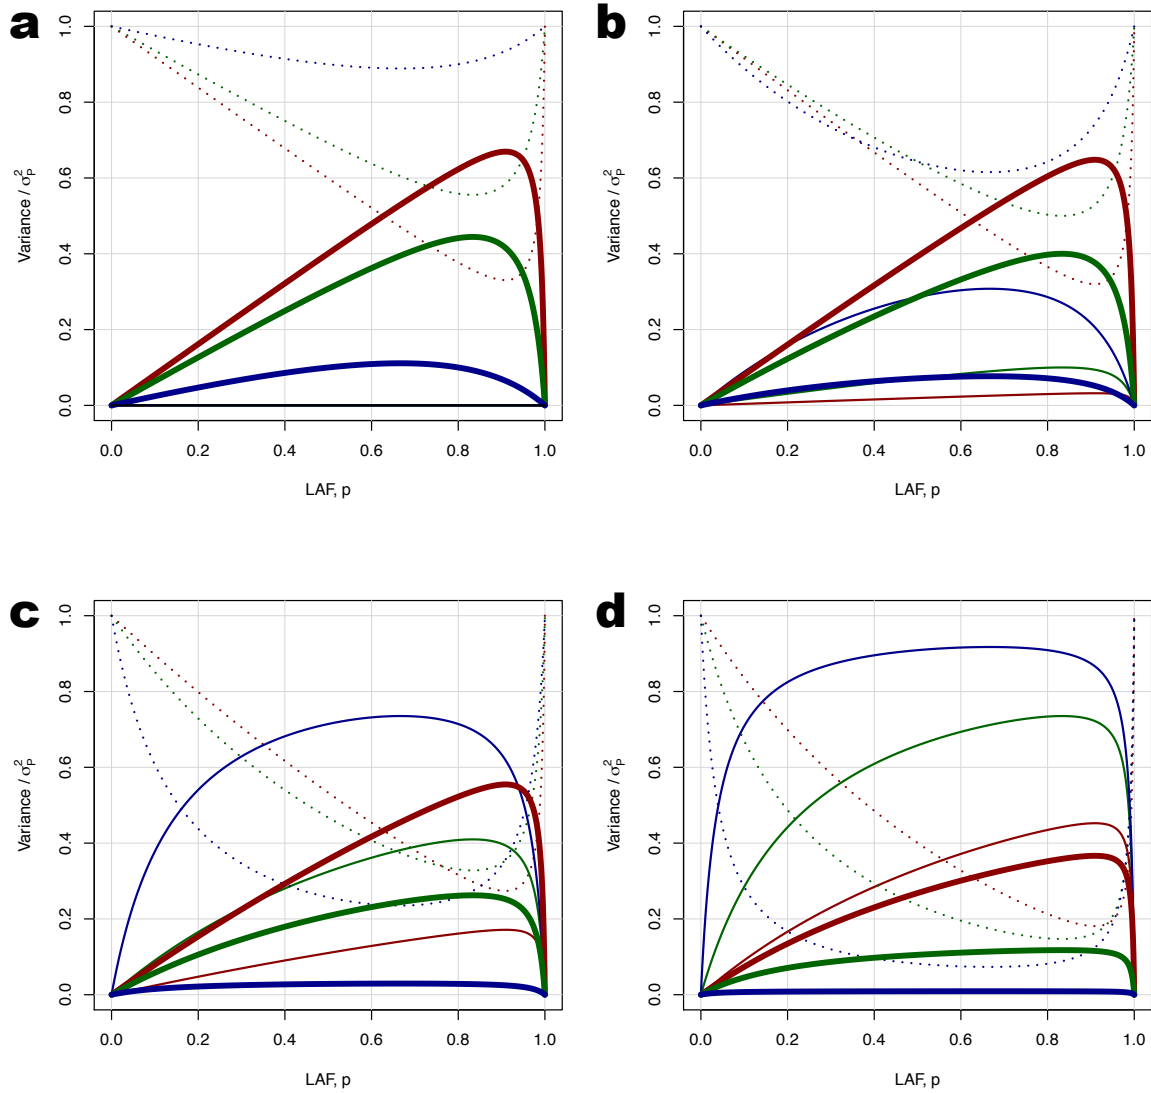

**Supplementary Figure A2: Dissection of the phenotypic variance with respect to the low-variance allele frequency (LAF).** The standard deviation of the low-variance allele (LA) was set to 1. The additive effect was set to be 0 (a), 2 (b), 5 (c) and 10 (d). The red, green and blue colors correspond to standard deviations of the high-variance allele 10, 5 and 2. The phenotypic variance  $V_P$  is dissected into variance due to mean shift,  $V_M (= V_A)$ , thin solid lines), variance due to variance heterogeneity between genotypes,  $V_V$  (bold solid lines) and residual variance  $V_R$  (dotted lines).

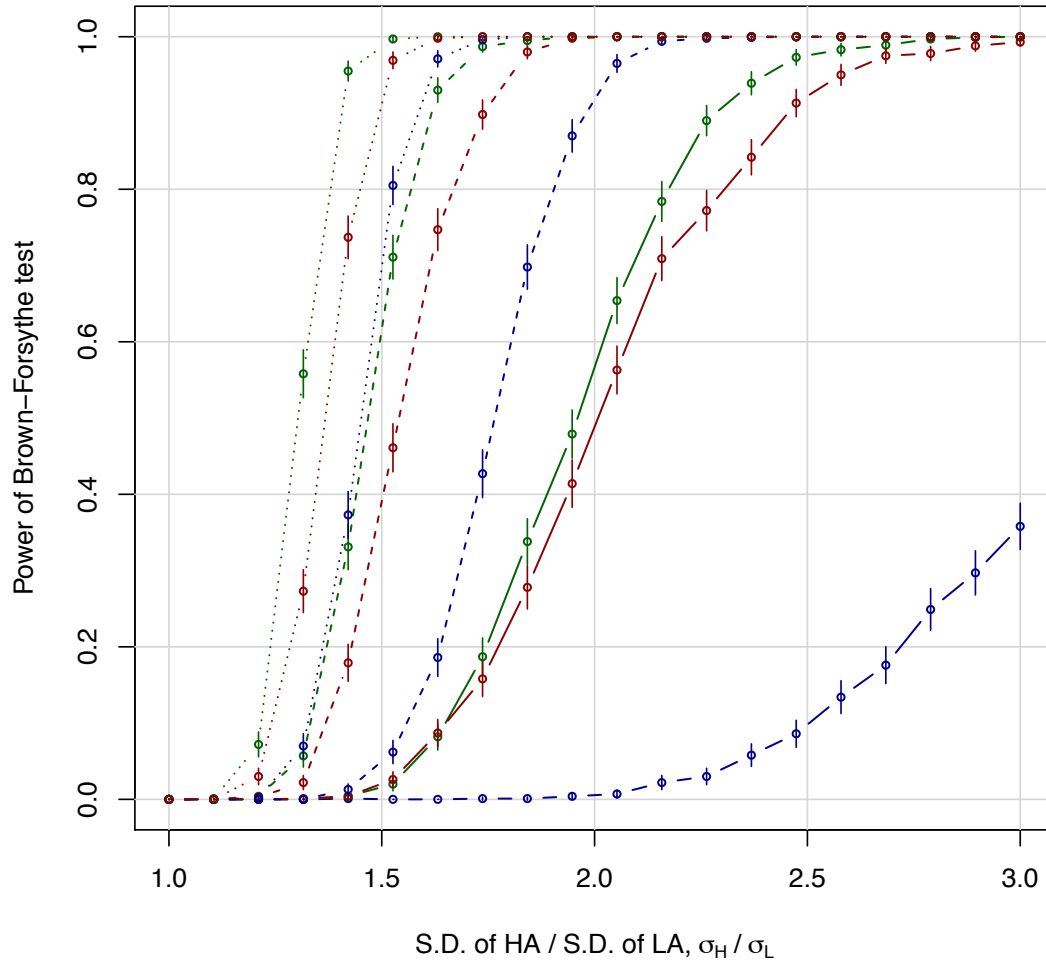

**Supplementary Figure A3: Power of the Brown-Forsythe test with respect to the level of variance heterogeneity.** The significant threshold was set to be  $5 \times 10^{-8}$ . The level of variance heterogeneity is represented by the ratio of the standard deviation of the high-variance allele (HA) to that of the low-variance allele (LA). The red, green and blue colors correspond to low-variance allele frequencies (LAFs) 0.8, 0.5 and 0.2. The sample size of 200 (solid lines), 500 (dashed lines) and 1000 (dotted lines) were evaluated. 1000 simulations were performed for each point, and the vertical bars indicate  $\pm$  twice standard errors.

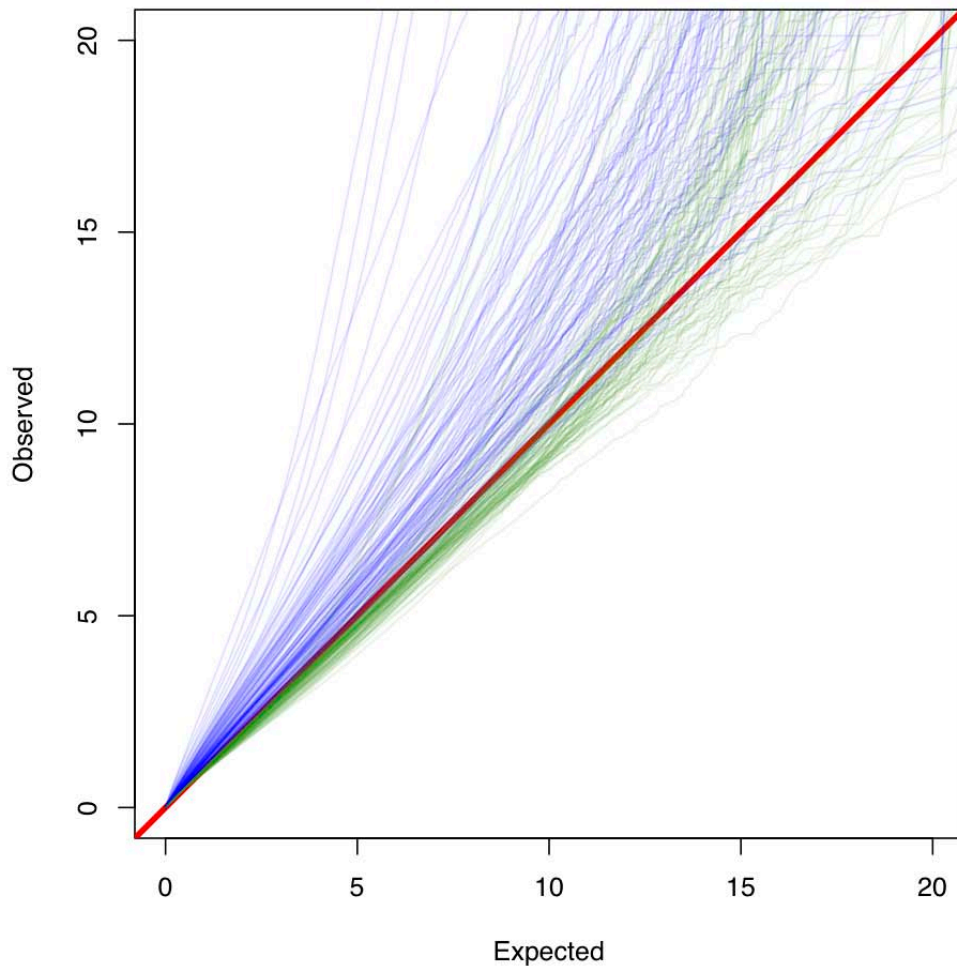

**Supplementary Figure A4: A simulation study comparing the genome-wide p-values of vGWAS before (blue) and after (green) genomic control (GC).** In each simulation/QQ-line, a SNP was randomly selected from the *Arabidopsis* genome, where a big variance-controlling effect was simulated with the standard deviation of the high-variance allele (HA)  $\sim 7.4$  times of that of the low-variance allele (LA). 100 simulations were carried out. Genome-widely, the mean false positive rate was  $3.9(\pm 1.4) \times 10^{-4}$  before GC and  $4.7(\pm 1.2) \times 10^{-5}$  after GC, where shown in the parentheses are the standard errors. The genome-wide significant threshold was determined by Bonferroni correction.

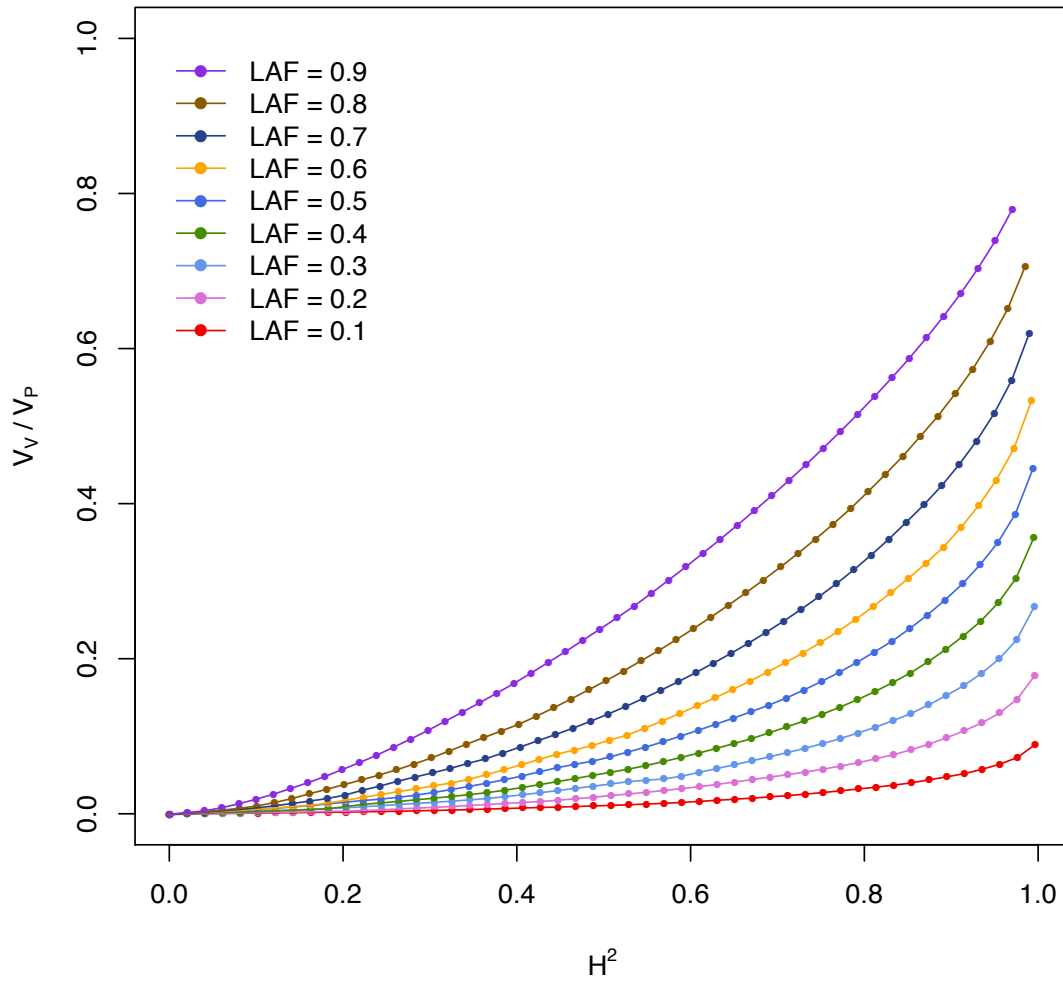

**Supplementary Figure A5: The relationship between the variance portion due to variance heterogeneity and the broad sense heritability assuming a 2-way interaction model.** The 2-way interaction model includes the main effect of the testing locus, the main effect of the other interacting factor (set to zero), and their interaction effect. The broad sense heritability is estimated as the coefficient of determination of the full interaction model. LAF = low-variance allele frequency.



**Histogram of the phenotype & QQ plots of the Brown-Forsythe  $p$ -values  
(blue: nominal  $p$ -values, green: genomic controlled)**

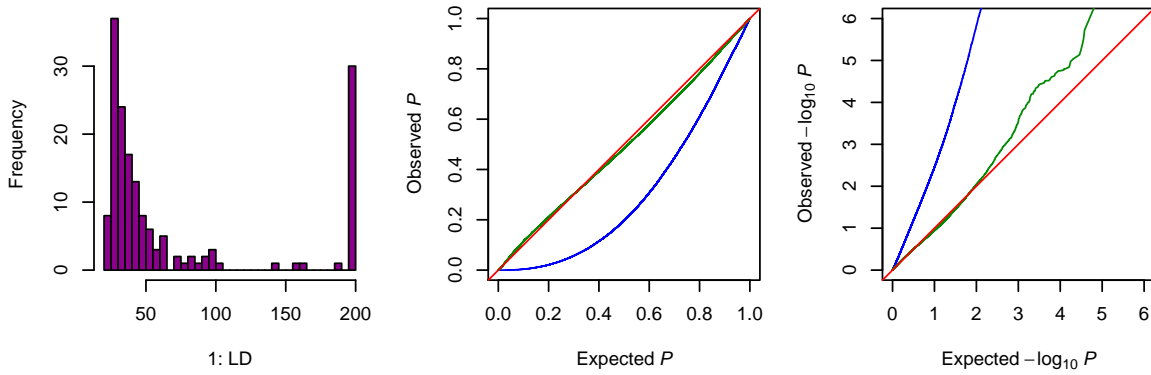

**Brown-Forsythe (colored, behind) & Wilcoxon (yellow, in front) results, genomic controlled**

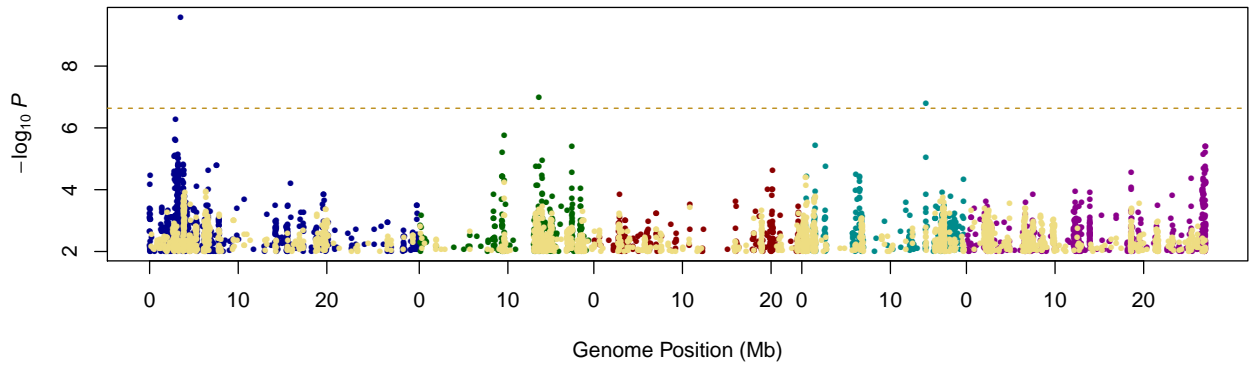

**Comparison of Brown-Forsythe & Wilcoxon  $p$ -values (MAF: minor allele frequency)**

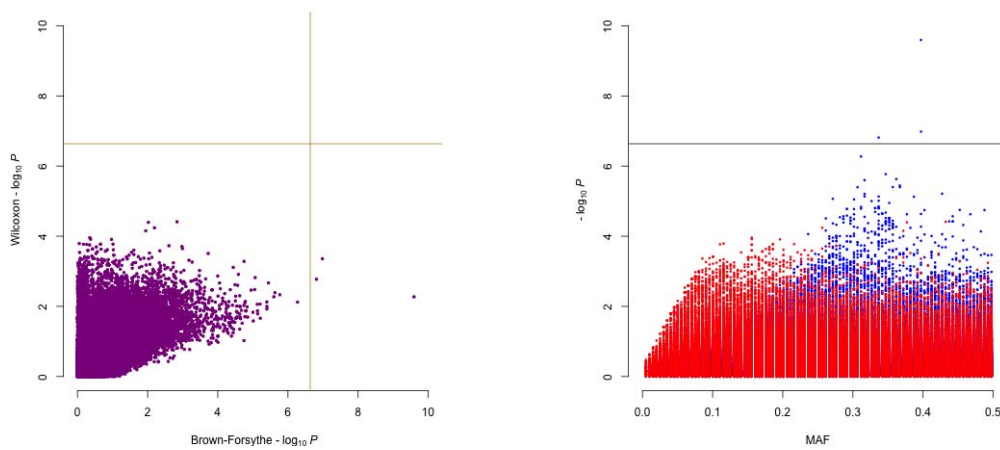

**Supplementary Figure B1 - Summary of vGWA results for 1: LD**

**Histogram of the phenotype & QQ plots of the Brown-Forsythe  $p$ -values  
(blue: nominal  $p$ -values, green: genomic controlled)**

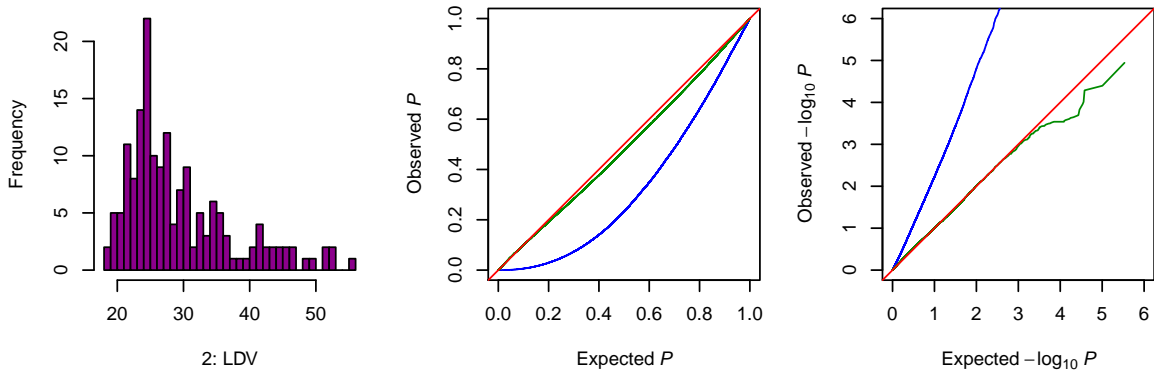

**Brown-Forsythe (colored, behind) & Wilcoxon (yellow, in front) results, genomic controlled**

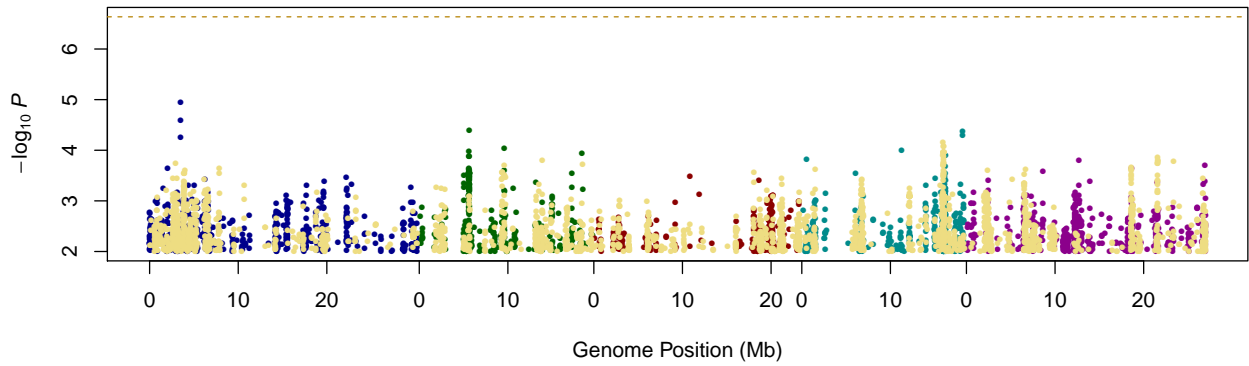

**Comparison of Brown-Forsythe & Wilcoxon  $p$ -values (MAF: minor allele frequency)**

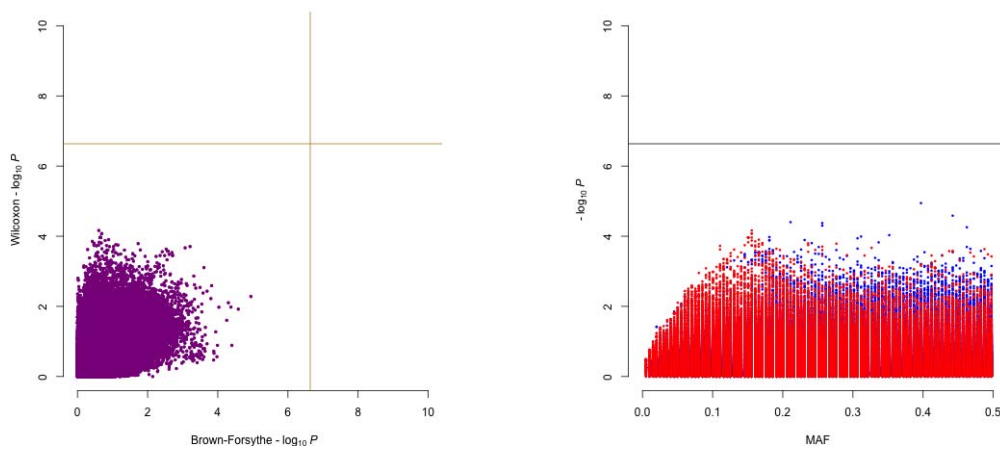

**Supplementary Figure B2 - Summary of vGWA results for 2: LDV**

**Histogram of the phenotype & QQ plots of the Brown-Forsythe  $p$ -values  
(blue: nominal  $p$ -values, green: genomic controlled)**

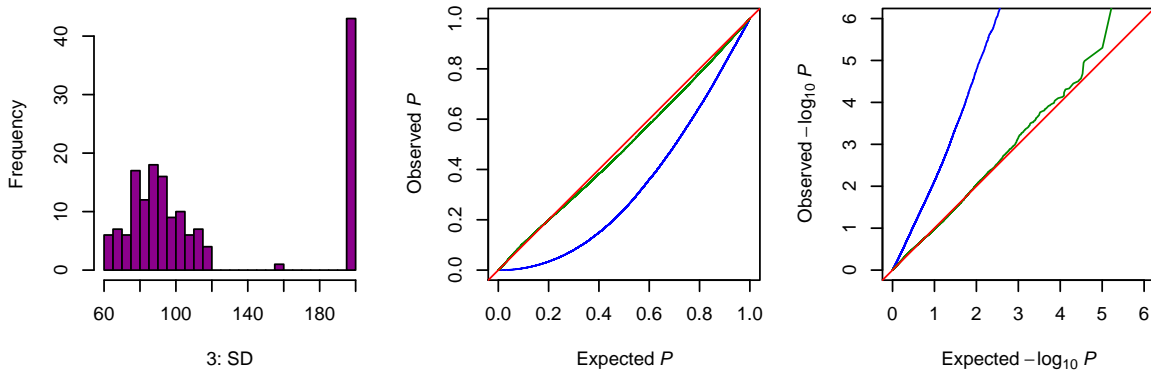

**Brown-Forsythe (colored, behind) & Wilcoxon (yellow, in front) results, genomic controlled**

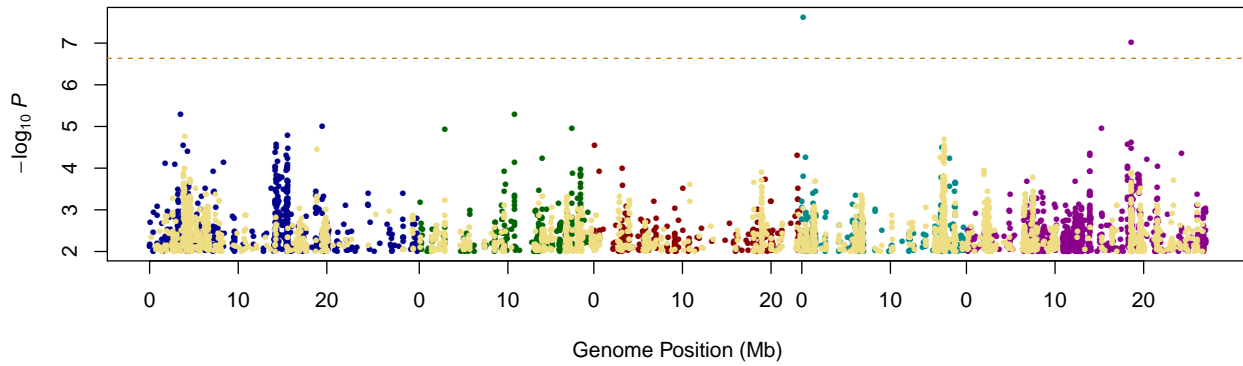

**Comparison of Brown-Forsythe & Wilcoxon  $p$ -values (MAF: minor allele frequency)**

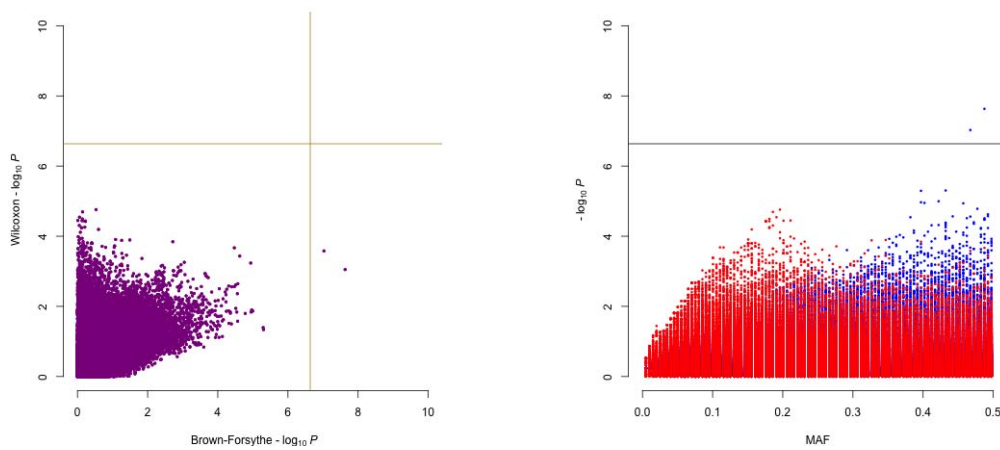

**Supplementary Figure B3 - Summary of vGWA results for 3: SD**

**Histogram of the phenotype & QQ plots of the Brown-Forsythe  $p$ -values  
(blue: nominal  $p$ -values, green: genomic controlled)**

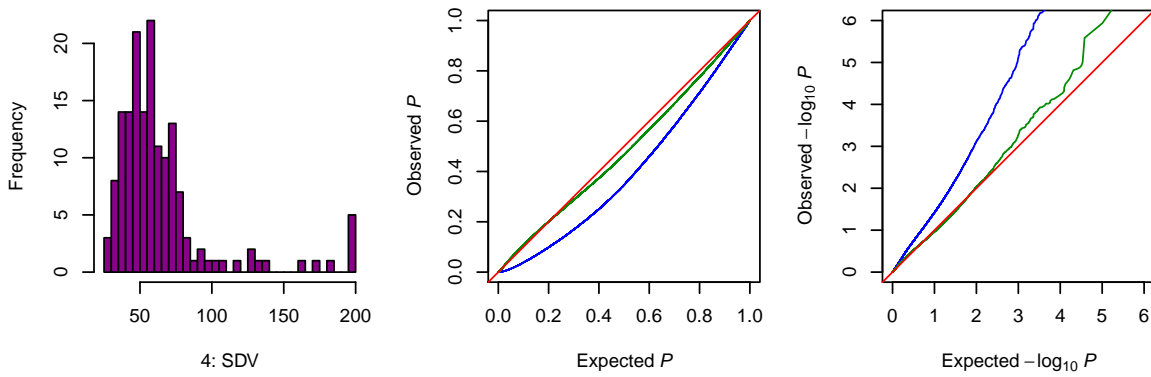

**Brown-Forsythe (colored, behind) & Wilcoxon (yellow, in front) results, genomic controlled**

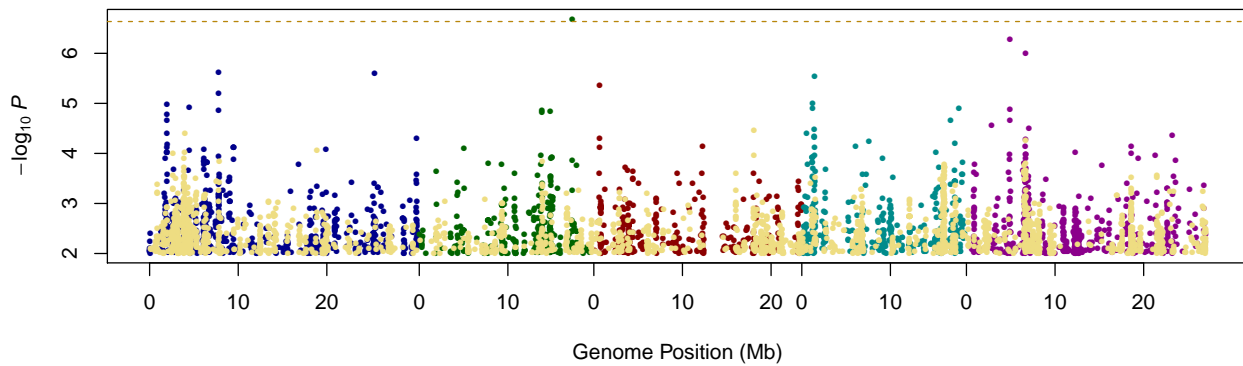

**Comparison of Brown-Forsythe & Wilcoxon  $p$ -values (MAF: minor allele frequency)**

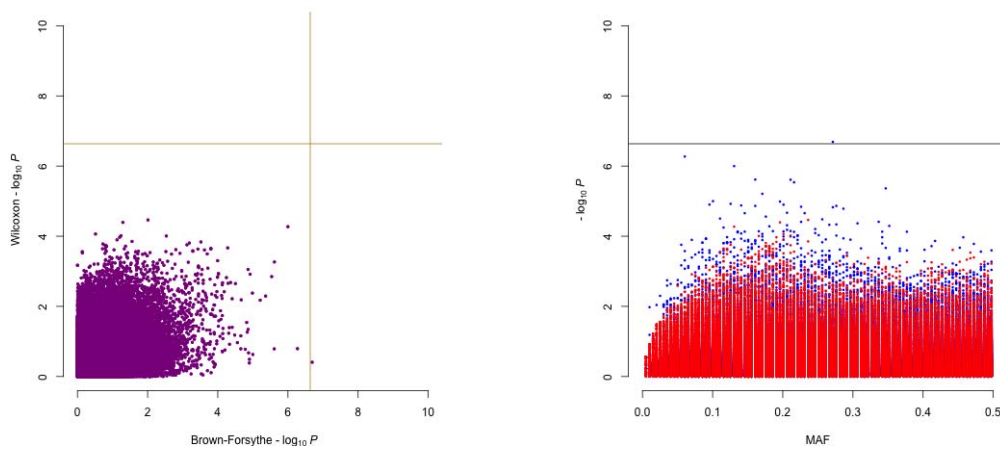

**Supplementary Figure B4 - Summary of vGWA results for 4: SDV**

**Histogram of the phenotype & QQ plots of the Brown-Forsythe  $p$ -values  
(blue: nominal  $p$ -values, green: genomic controlled)**

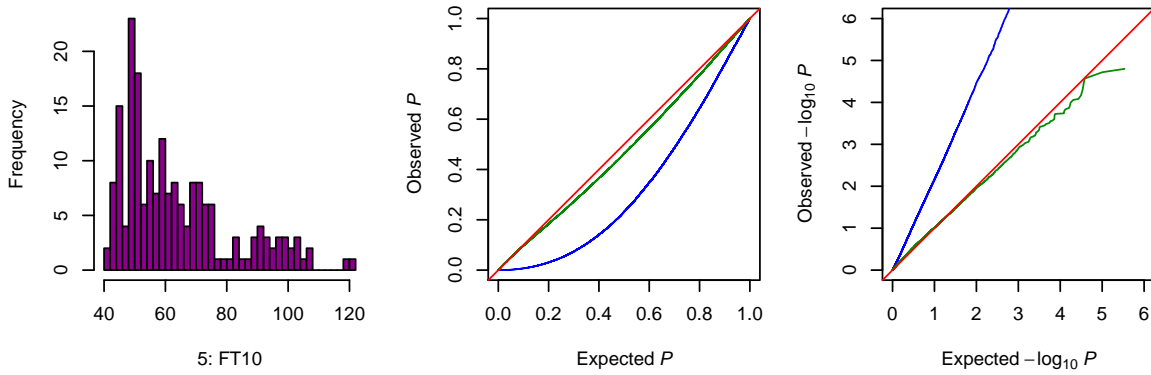

**Brown-Forsythe (colored, behind) & Wilcoxon (yellow, in front) results, genomic controlled**

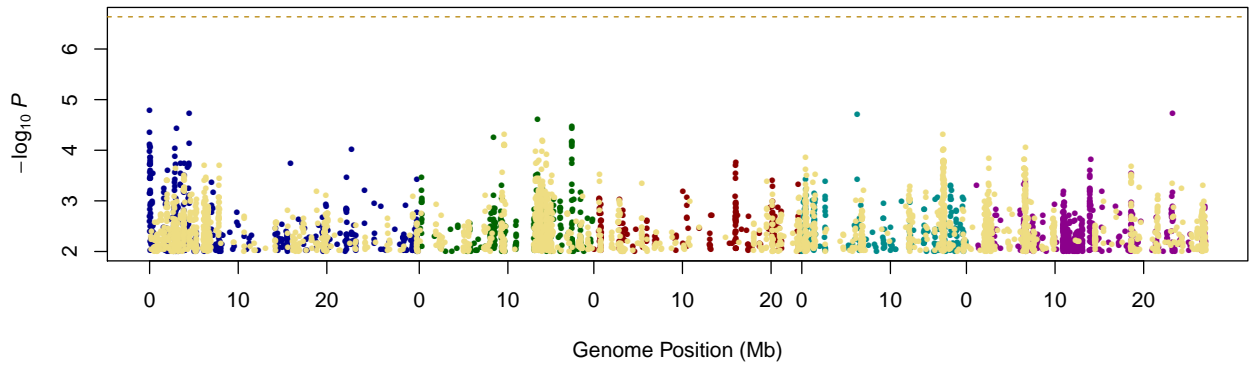

**Comparison of Brown-Forsythe & Wilcoxon  $p$ -values (MAF: minor allele frequency)**

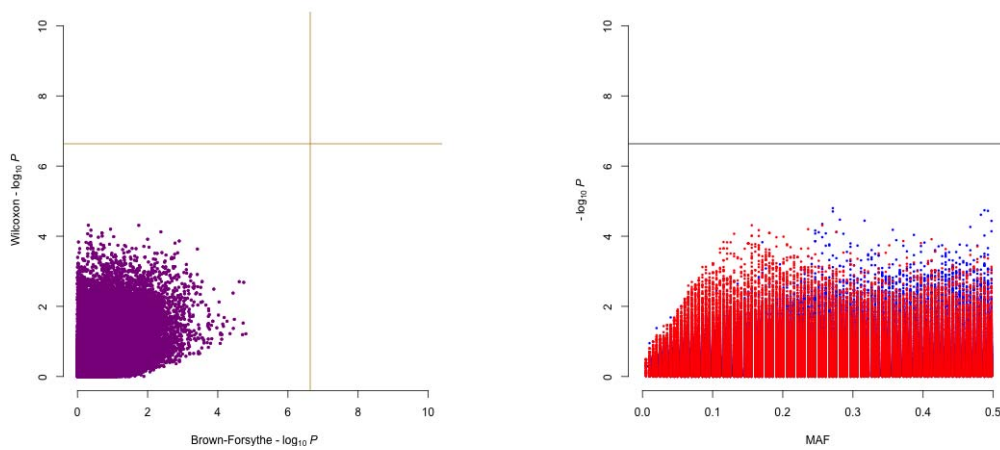

**Supplementary Figure B5 - Summary of vGWA results for 5: FT10**

**Histogram of the phenotype & QQ plots of the Brown-Forsythe  $p$ -values  
(blue: nominal  $p$ -values, green: genomic controlled)**

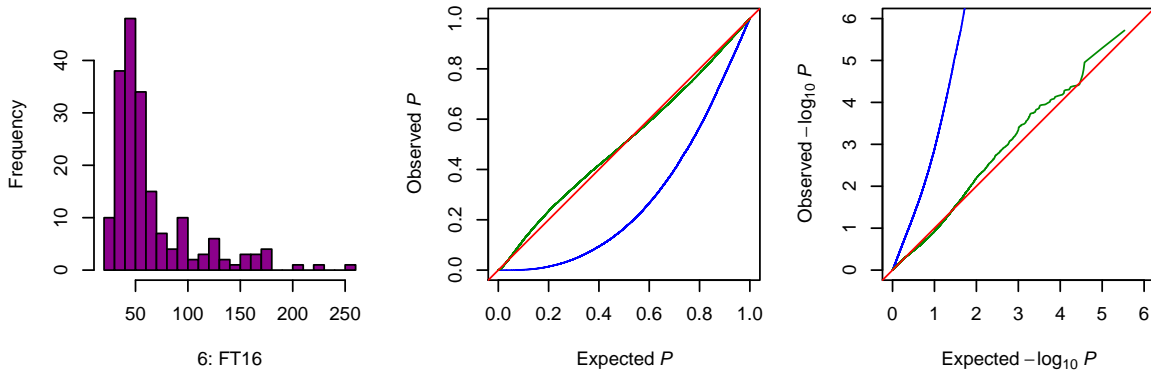

**Brown-Forsythe (colored, behind) & Wilcoxon (yellow, in front) results, genomic controlled**

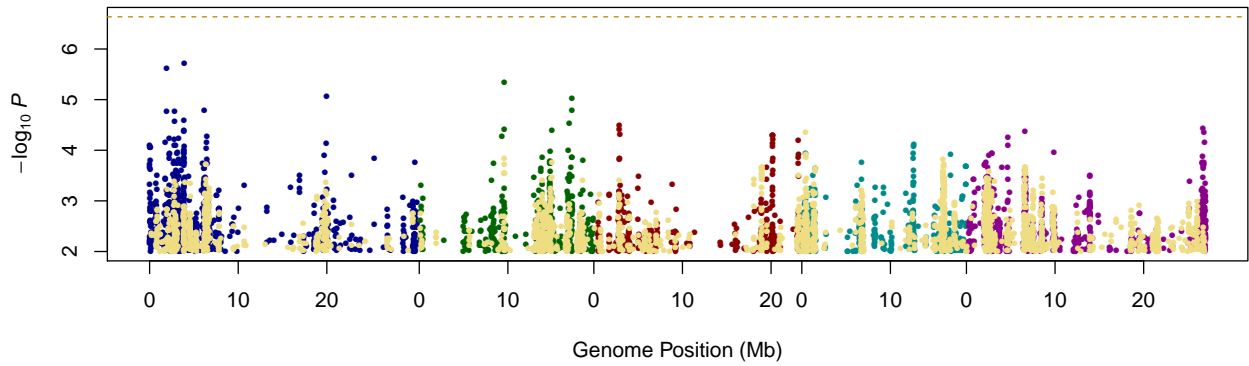

**Comparison of Brown-Forsythe & Wilcoxon  $p$ -values (MAF: minor allele frequency)**

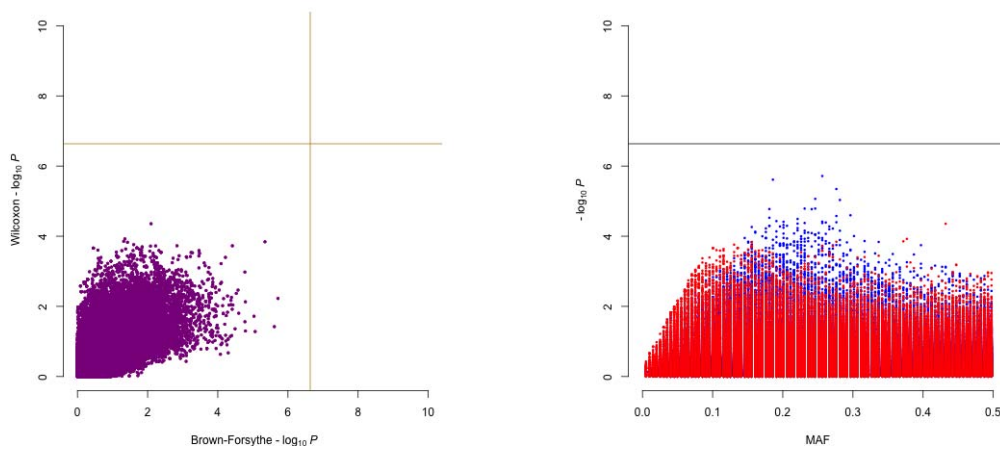

**Supplementary Figure B6 - Summary of vGWA results for 6: FT16**

**Histogram of the phenotype & QQ plots of the Brown-Forsythe  $p$ -values  
(blue: nominal  $p$ -values, green: genomic controlled)**

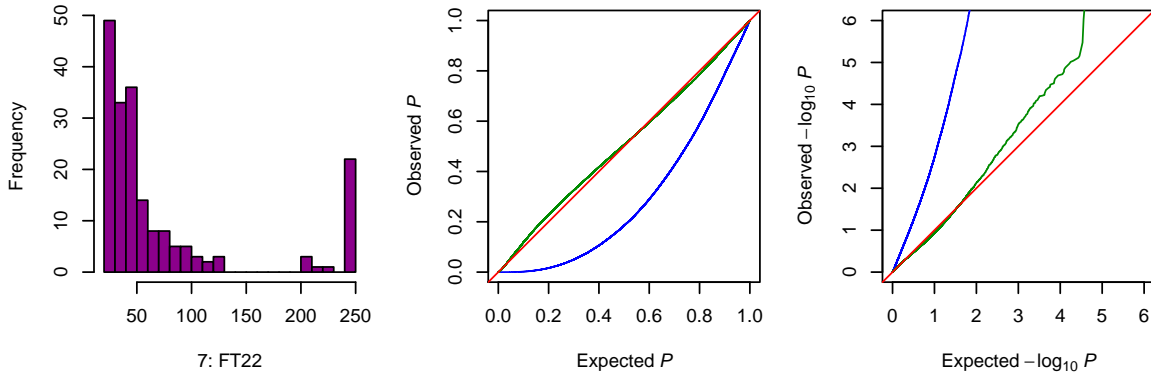

**Brown-Forsythe (colored, behind) & Wilcoxon (yellow, in front) results, genomic controlled**

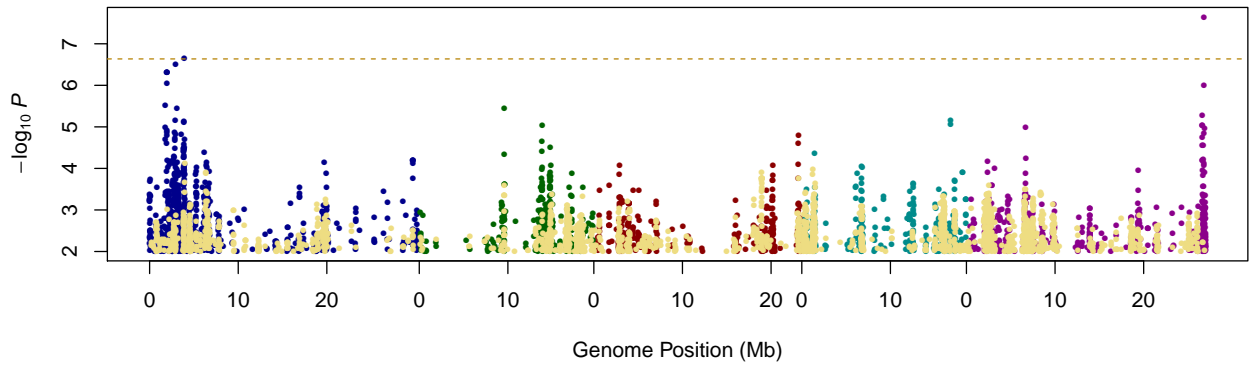

**Comparison of Brown-Forsythe & Wilcoxon  $p$ -values (MAF: minor allele frequency)**

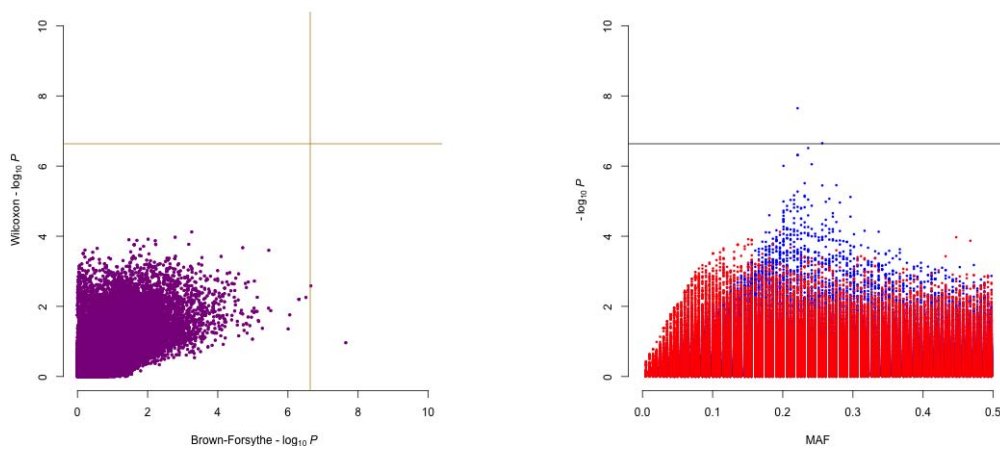

**Supplementary Figure B7 - Summary of vGWA results for 7: FT22**

**Histogram of the phenotype & QQ plots of the Brown-Forsythe  $p$ -values  
(blue: nominal  $p$ -values, green: genomic controlled)**

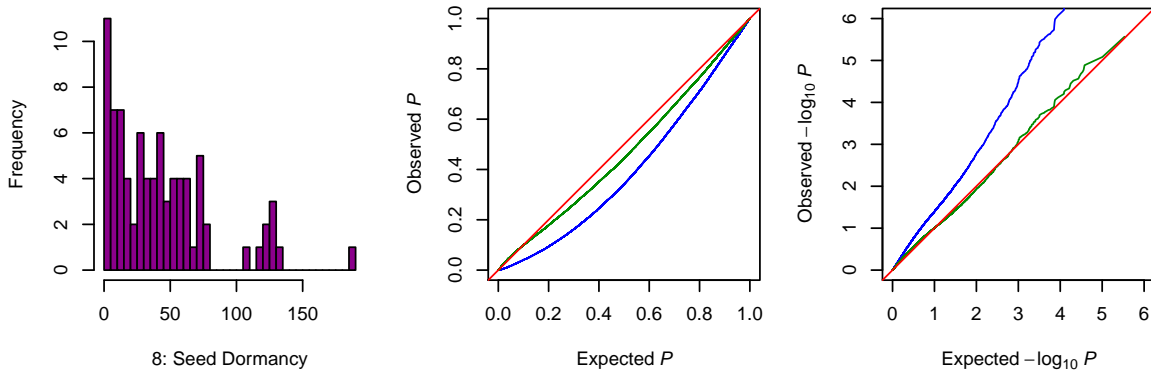

**Brown-Forsythe (colored, behind) & Wilcoxon (yellow, in front) results, genomic controlled**

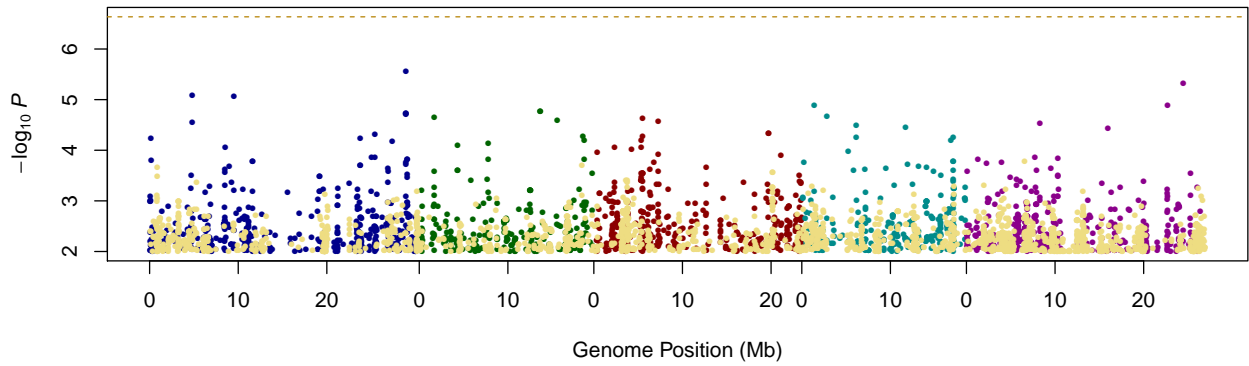

**Comparison of Brown-Forsythe & Wilcoxon  $p$ -values (MAF: minor allele frequency)**

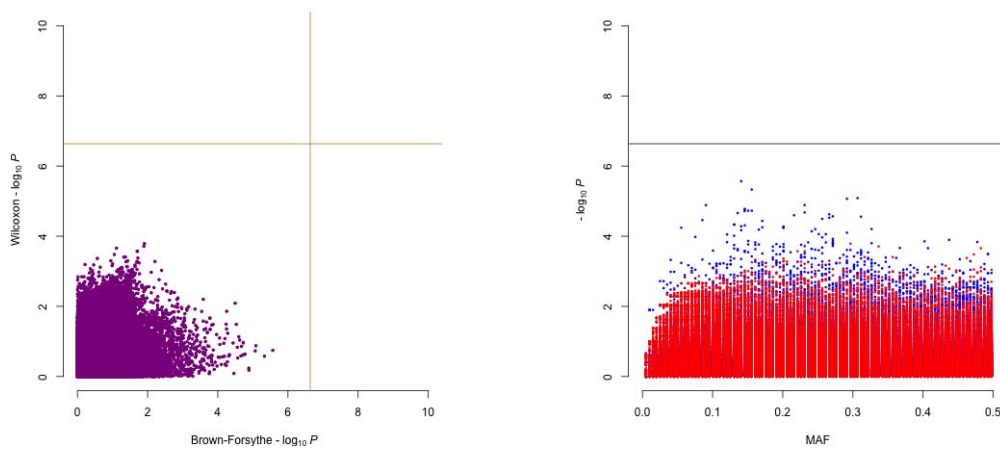

**Supplementary Figure B8 - Summary of vGWA results for 8: Seed Dormancy**



**Histogram of the phenotype & QQ plots of the Brown-Forsythe  $p$ -values  
(blue: nominal  $p$ -values, green: genomic controlled)**

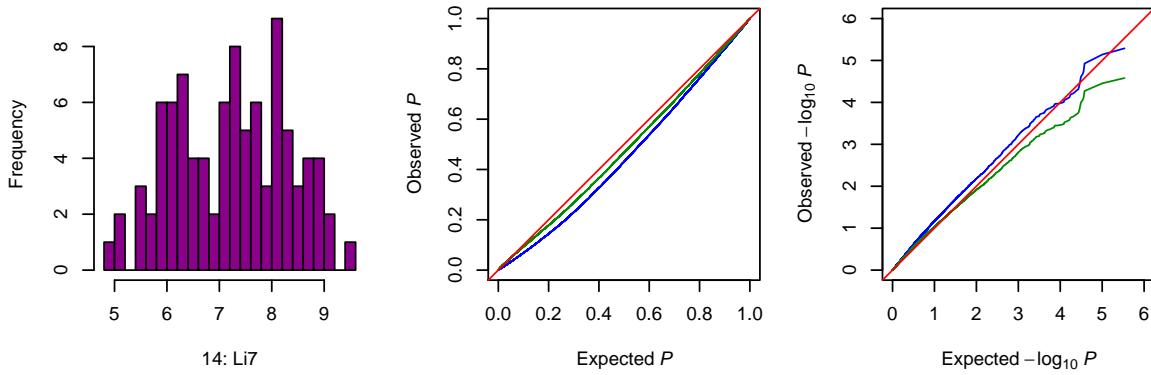

**Brown-Forsythe (colored, behind) & Wilcoxon (yellow, in front) results, genomic controlled**

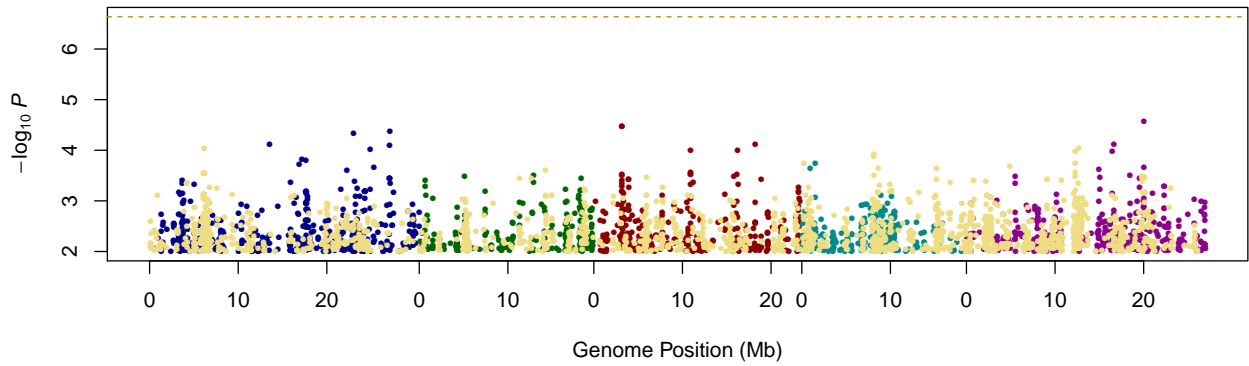

**Comparison of Brown-Forsythe & Wilcoxon  $p$ -values (MAF: minor allele frequency)**

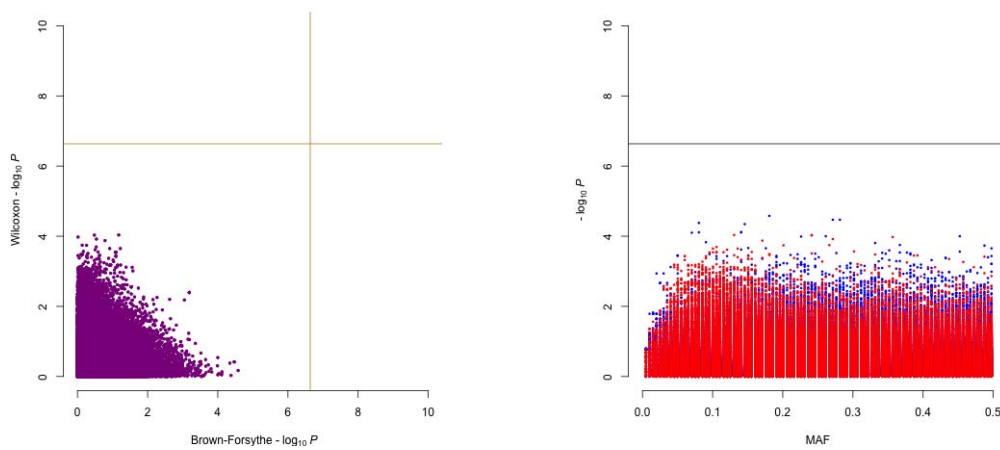

**Supplementary Figure B9 - Summary of vGWA results for 14: Li7**

**Histogram of the phenotype & QQ plots of the Brown-Forsythe  $p$ -values  
(blue: nominal  $p$ -values, green: genomic controlled)**

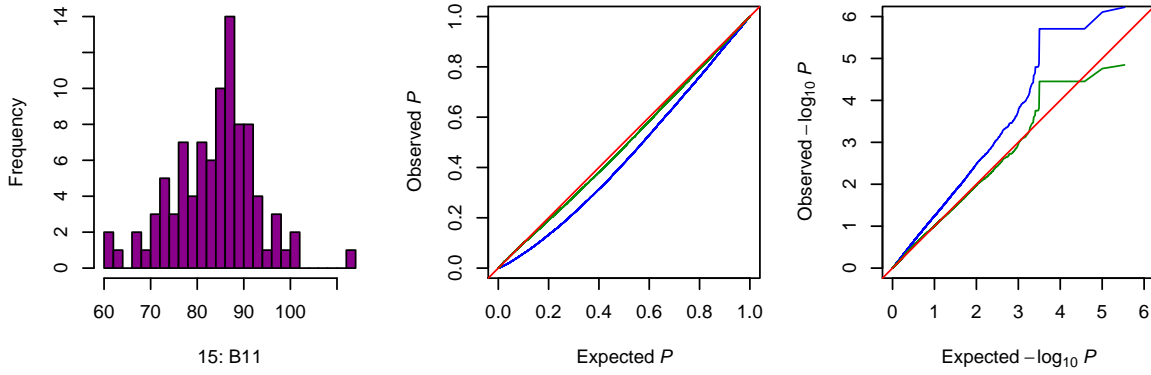

**Brown-Forsythe (colored, behind) & Wilcoxon (yellow, in front) results, genomic controlled**

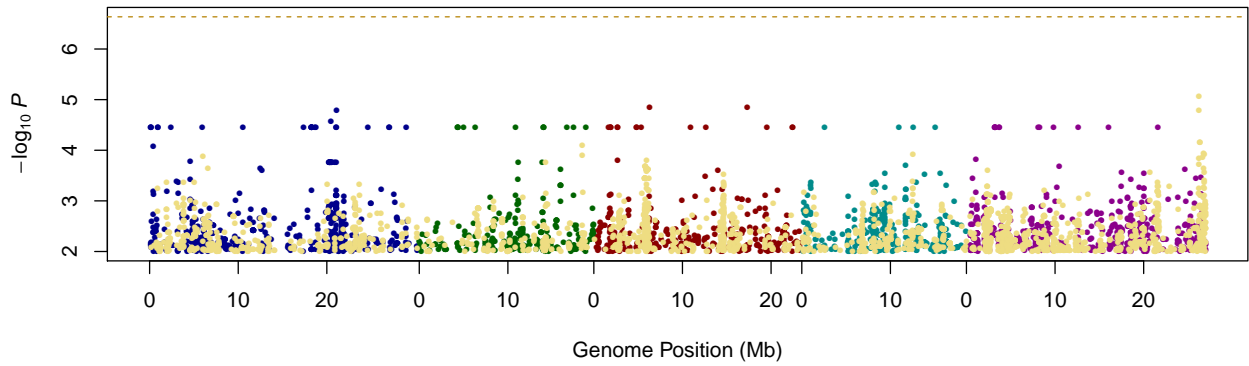

**Comparison of Brown-Forsythe & Wilcoxon  $p$ -values (MAF: minor allele frequency)**

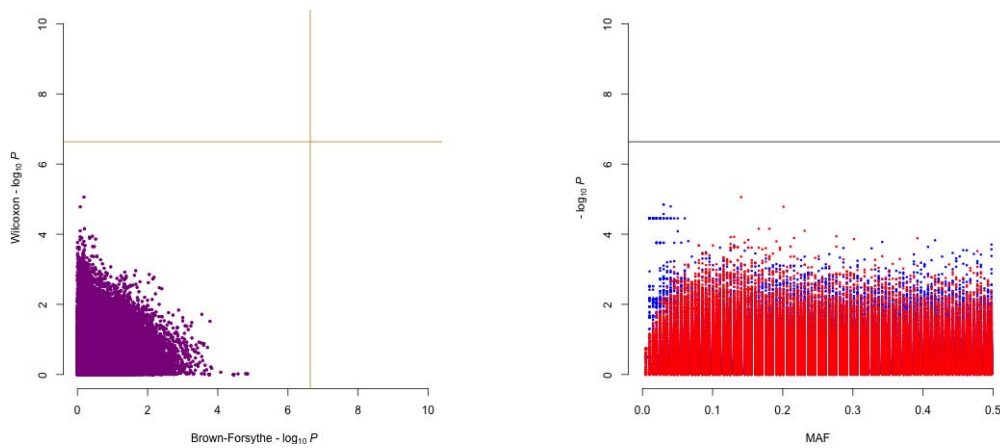

**Supplementary Figure B10 - Summary of vGWA results for 15: B11**

**Histogram of the phenotype & QQ plots of the Brown-Forsythe  $p$ -values  
(blue: nominal  $p$ -values, green: genomic controlled)**

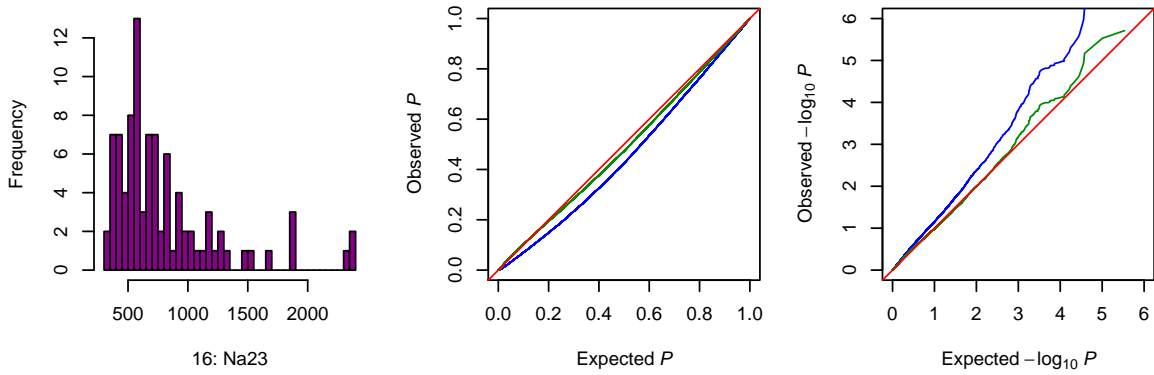

**Brown-Forsythe (colored, behind) & Wilcoxon (yellow, in front) results, genomic controlled**

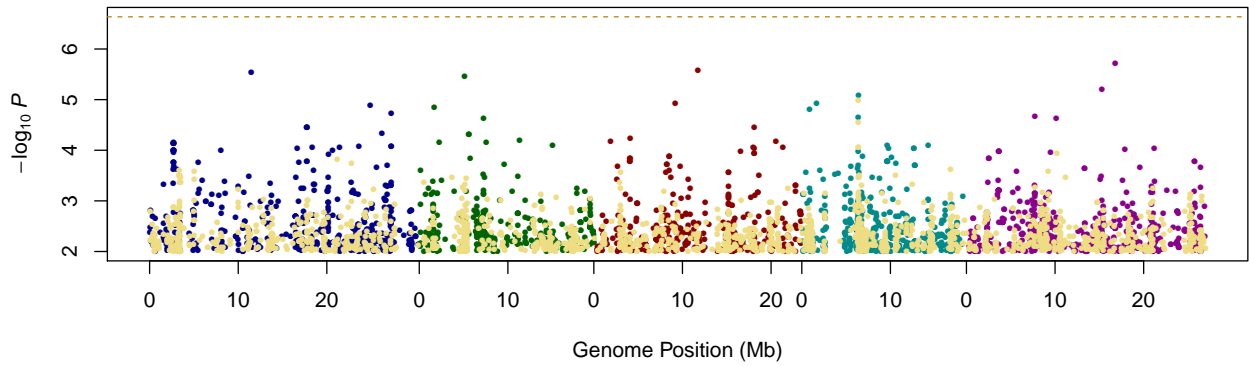

**Comparison of Brown-Forsythe & Wilcoxon  $p$ -values (MAF: minor allele frequency)**

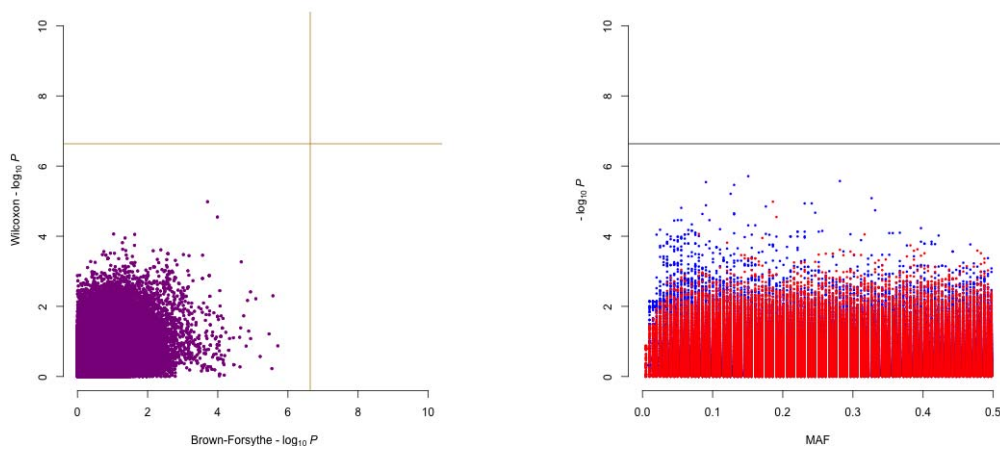

**Supplementary Figure B11 - Summary of vGWA results for 16: Na23**

**Histogram of the phenotype & QQ plots of the Brown-Forsythe  $p$ -values  
(blue: nominal  $p$ -values, green: genomic controlled)**

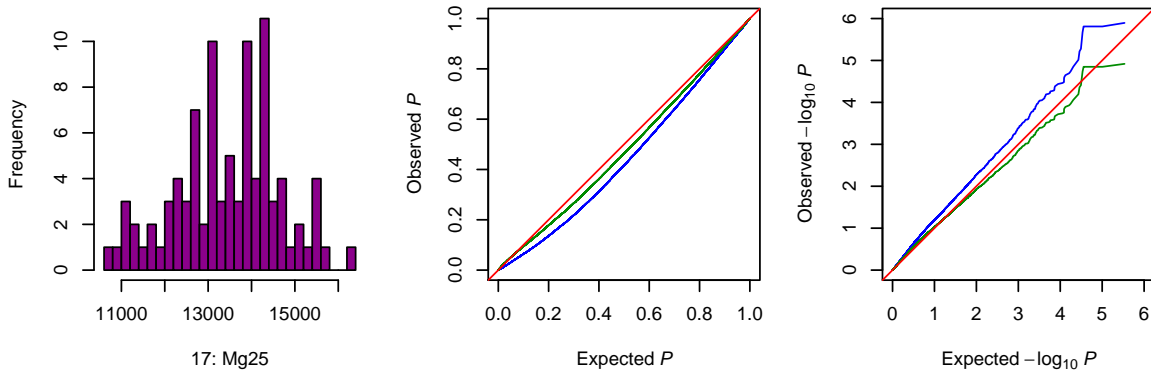

**Brown-Forsythe (colored, behind) & Wilcoxon (yellow, in front) results, genomic controlled**

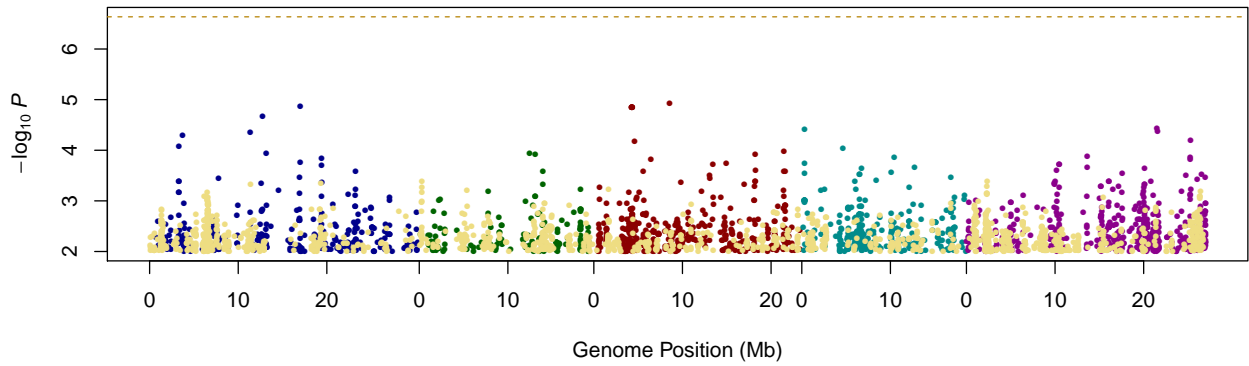

**Comparison of Brown-Forsythe & Wilcoxon  $p$ -values (MAF: minor allele frequency)**

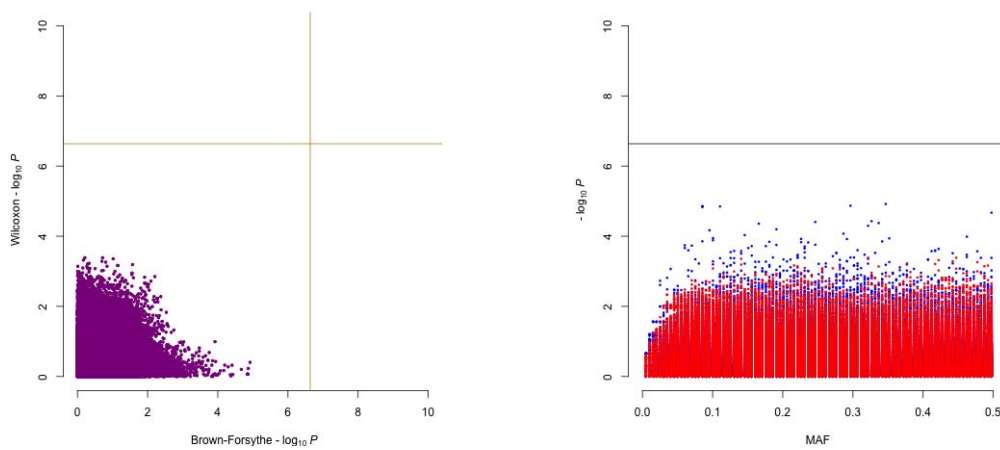

**Supplementary Figure B12 - Summary of vGWA results for 17: Mg25**

**Histogram of the phenotype & QQ plots of the Brown-Forsythe  $p$ -values  
(blue: nominal  $p$ -values, green: genomic controlled)**

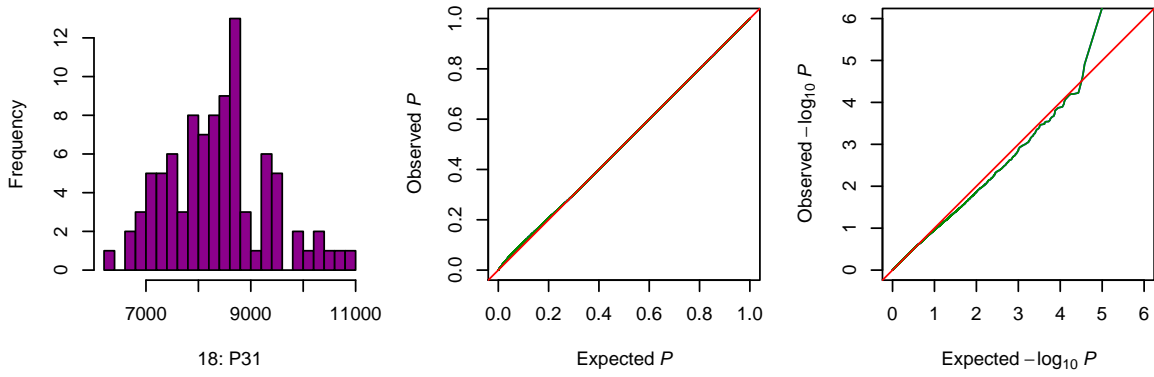

**Brown-Forsythe (colored, behind) & Wilcoxon (yellow, in front) results, genomic controlled**

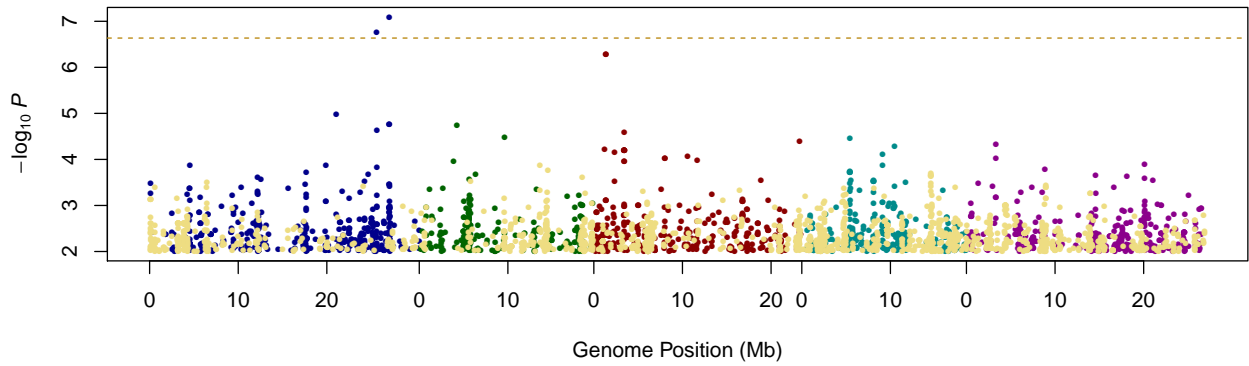

**Comparison of Brown-Forsythe & Wilcoxon  $p$ -values (MAF: minor allele frequency)**

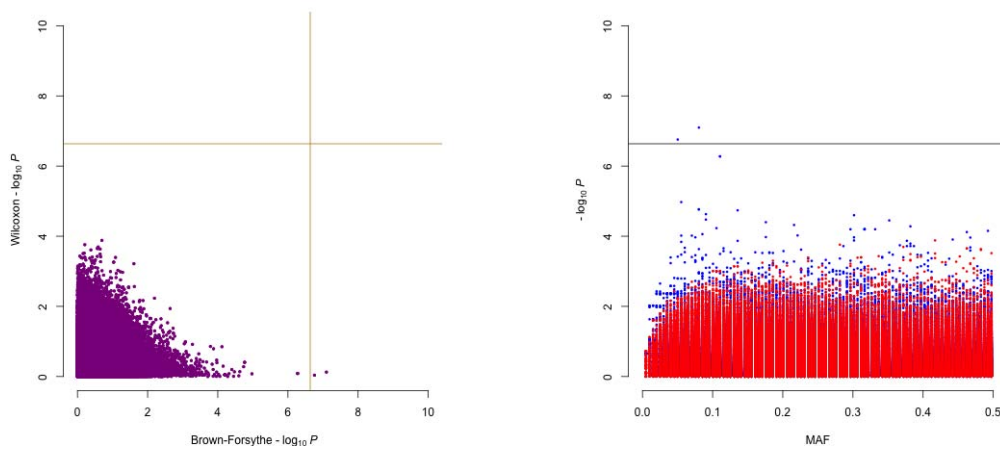

**Supplementary Figure B13 - Summary of vGWA results for 18: P31**

**Histogram of the phenotype & QQ plots of the Brown-Forsythe  $p$ -values  
(blue: nominal  $p$ -values, green: genomic controlled)**

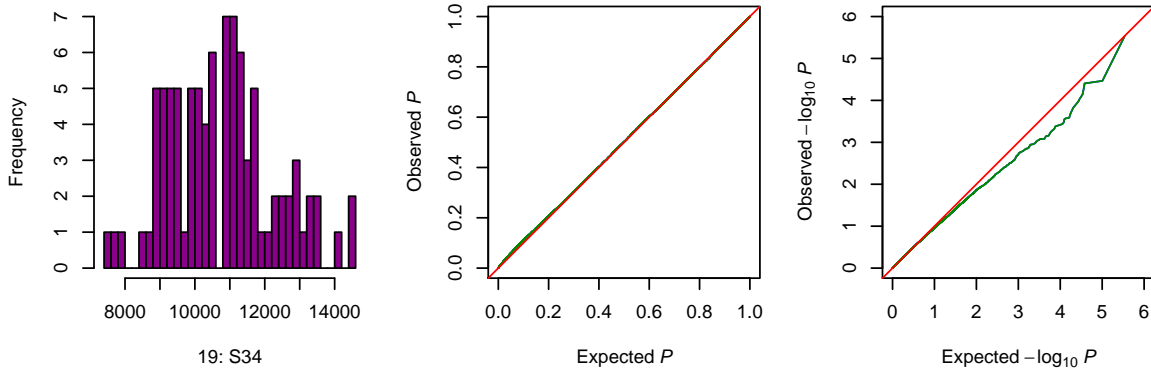

**Brown-Forsythe (colored, behind) & Wilcoxon (yellow, in front) results, genomic controlled**

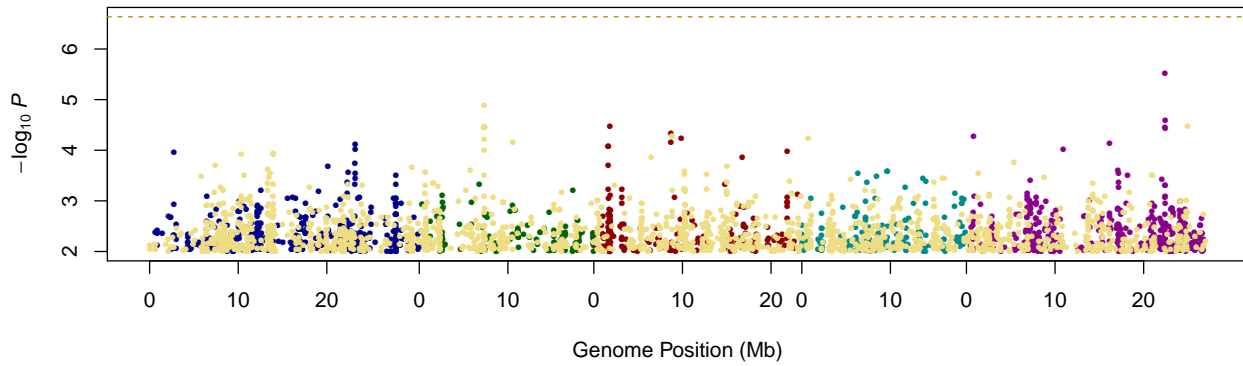

**Comparison of Brown-Forsythe & Wilcoxon  $p$ -values (MAF: minor allele frequency)**

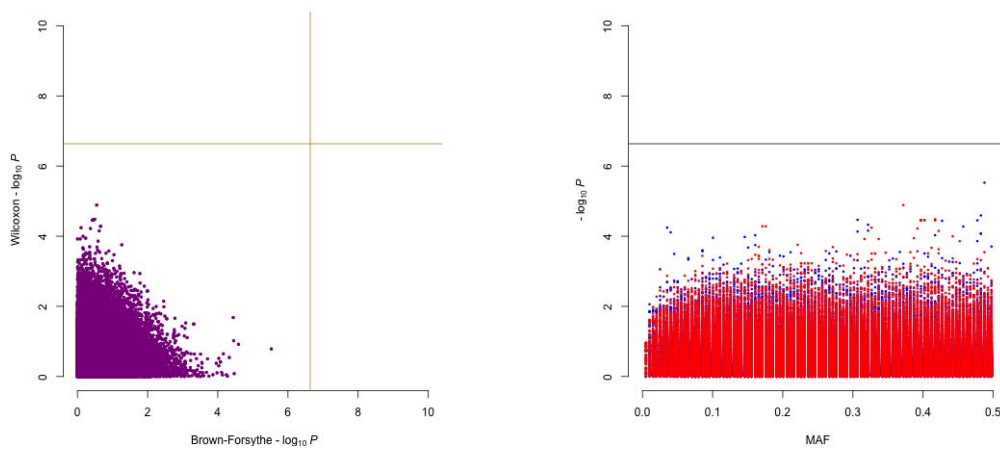

**Supplementary Figure B14 - Summary of vGWA results for 19: S34**

**Histogram of the phenotype & QQ plots of the Brown-Forsythe  $p$ -values  
(blue: nominal  $p$ -values, green: genomic controlled)**

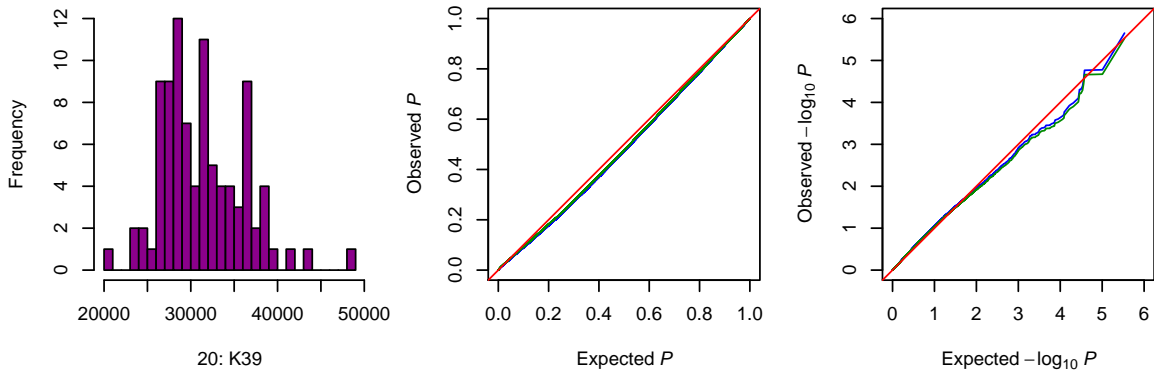

**Brown-Forsythe (colored, behind) & Wilcoxon (yellow, in front) results, genomic controlled**

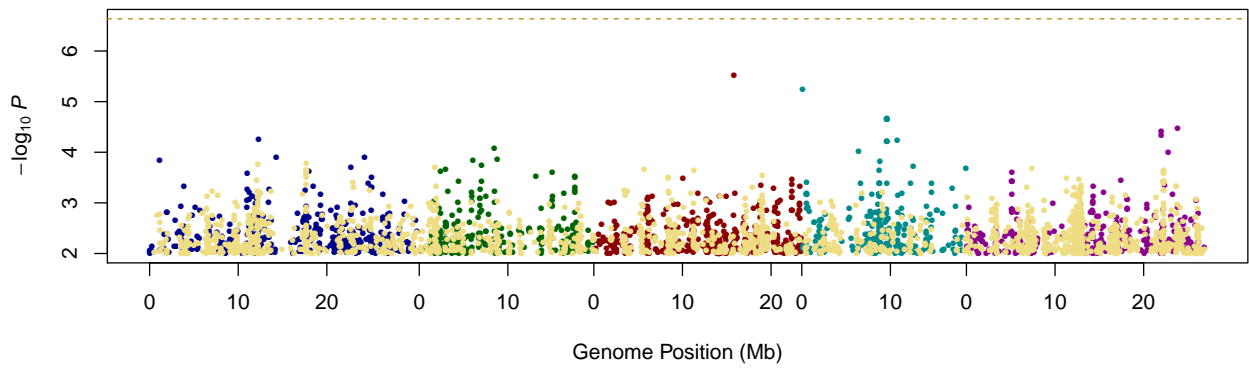

**Comparison of Brown-Forsythe & Wilcoxon  $p$ -values (MAF: minor allele frequency)**

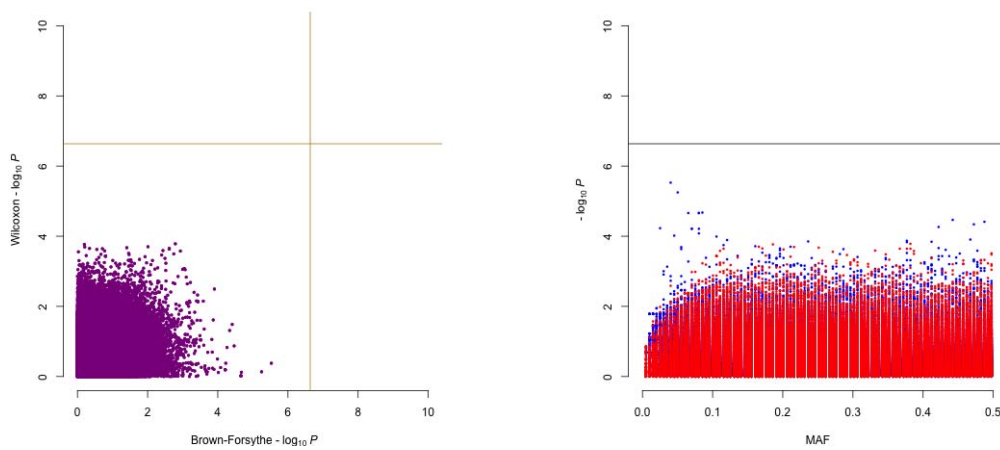

**Supplementary Figure B15 - Summary of vGWA results for 20: K39**

**Histogram of the phenotype & QQ plots of the Brown-Forsythe  $p$ -values  
(blue: nominal  $p$ -values, green: genomic controlled)**

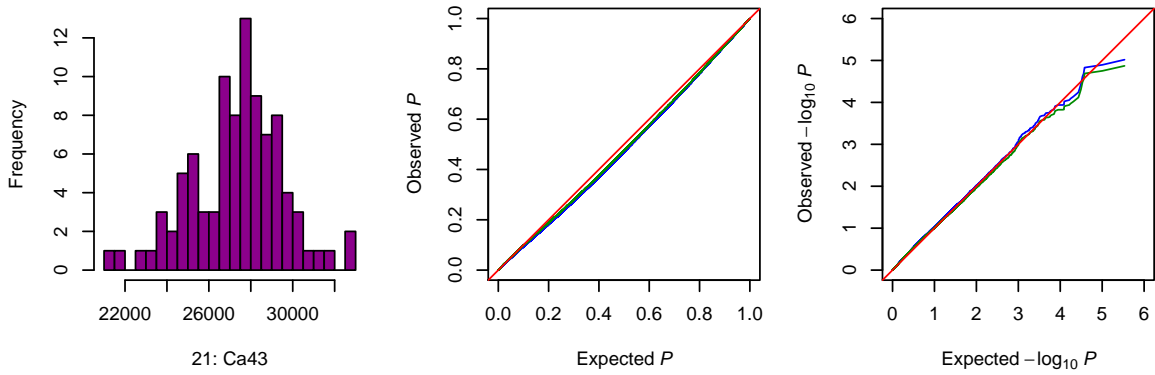

**Brown-Forsythe (colored, behind) & Wilcoxon (yellow, in front) results, genomic controlled**

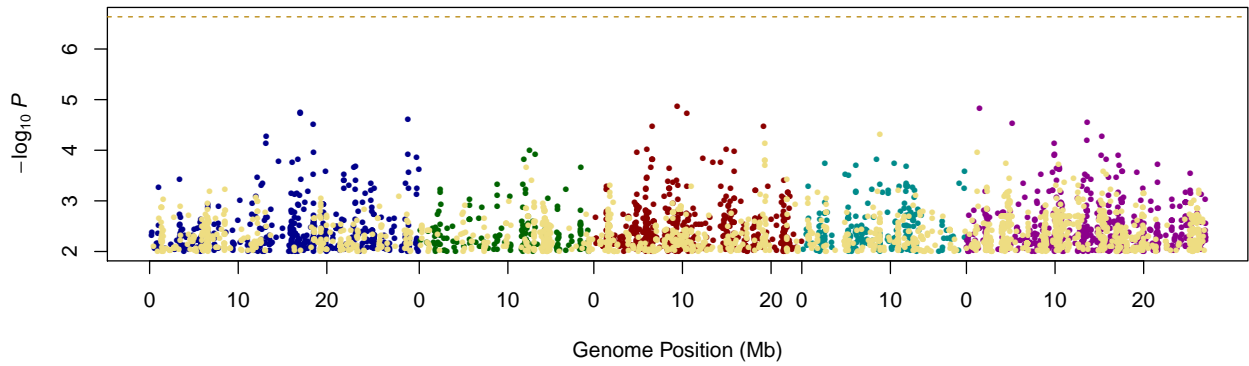

**Comparison of Brown-Forsythe & Wilcoxon  $p$ -values (MAF: minor allele frequency)**

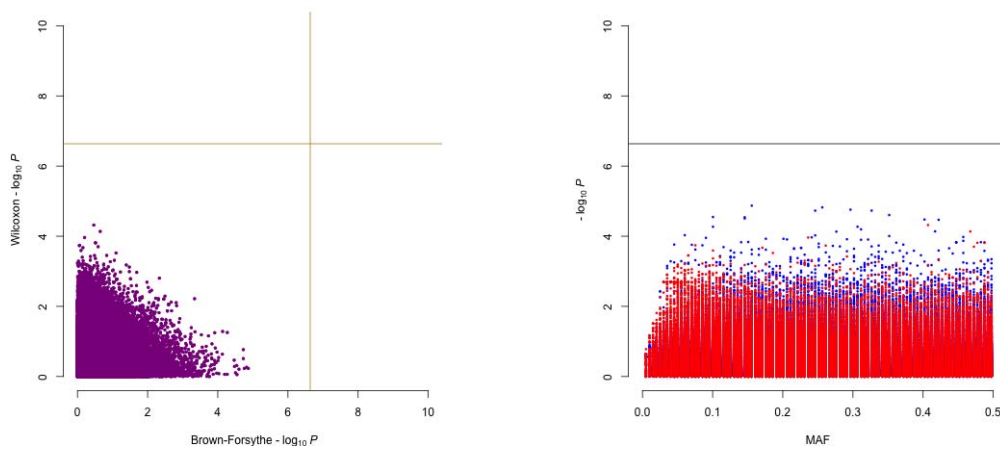

**Supplementary Figure B16 - Summary of vGWA results for 21: Ca43**



**Histogram of the phenotype & QQ plots of the Brown-Forsythe  $p$ -values  
(blue: nominal  $p$ -values, green: genomic controlled)**

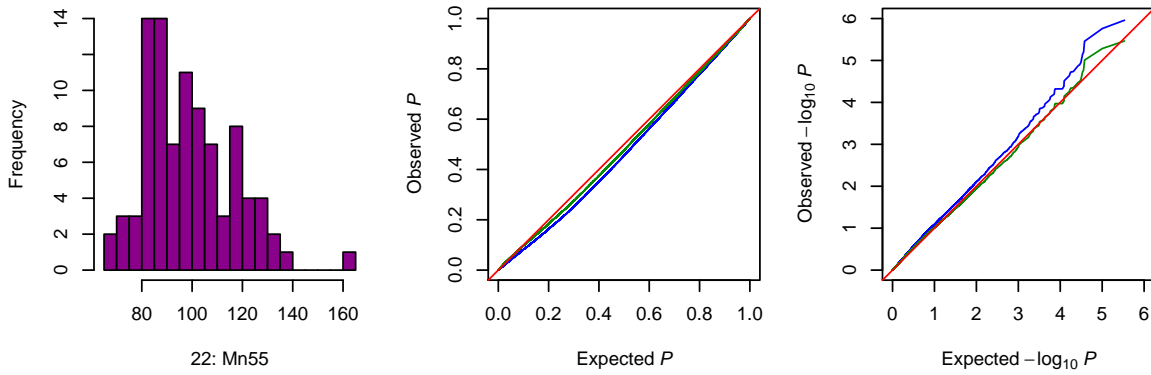

**Brown-Forsythe (colored, behind) & Wilcoxon (yellow, in front) results, genomic controlled**

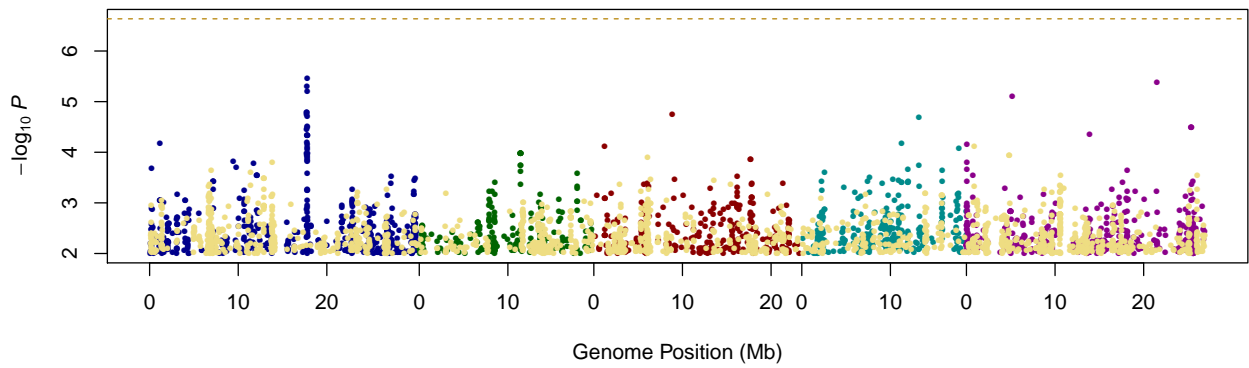

**Comparison of Brown-Forsythe & Wilcoxon  $p$ -values (MAF: minor allele frequency)**

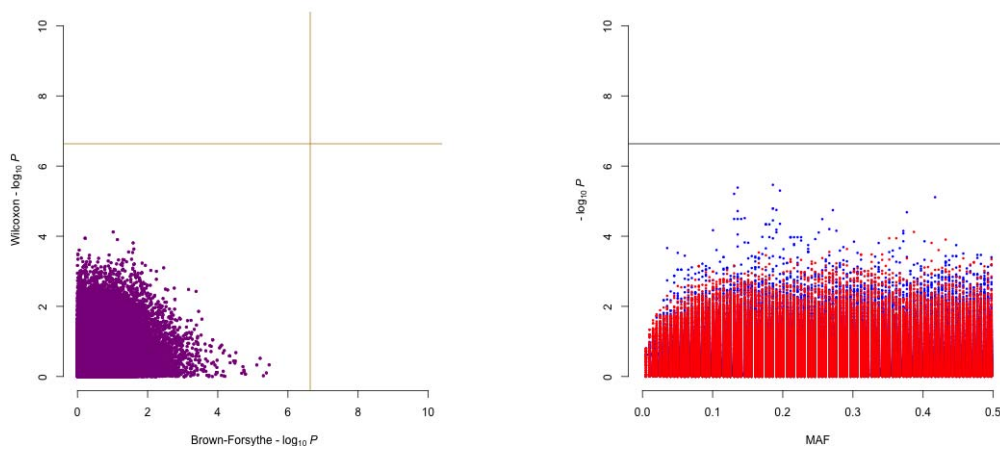

**Supplementary Figure B17 - Summary of vGWA results for 22: Mn55**

**Histogram of the phenotype & QQ plots of the Brown-Forsythe  $p$ -values  
(blue: nominal  $p$ -values, green: genomic controlled)**

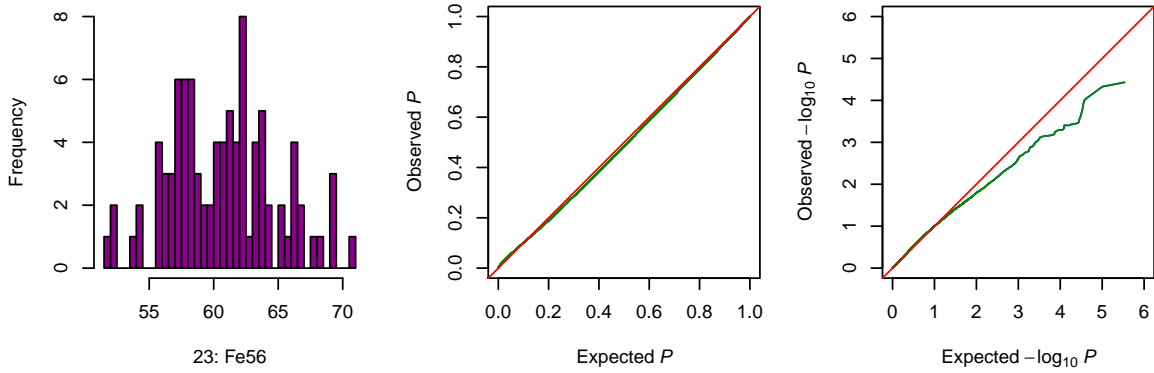

**Brown-Forsythe (colored, behind) & Wilcoxon (yellow, in front) results, genomic controlled**

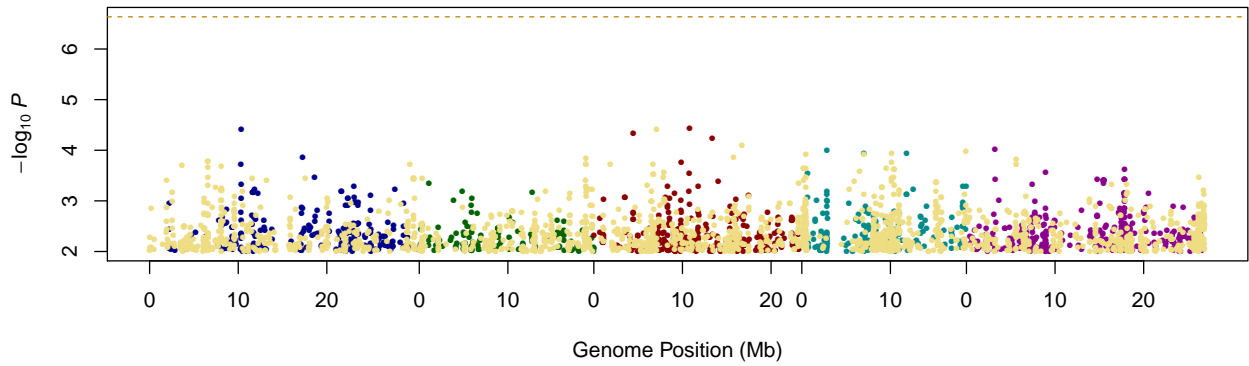

**Comparison of Brown-Forsythe & Wilcoxon  $p$ -values (MAF: minor allele frequency)**

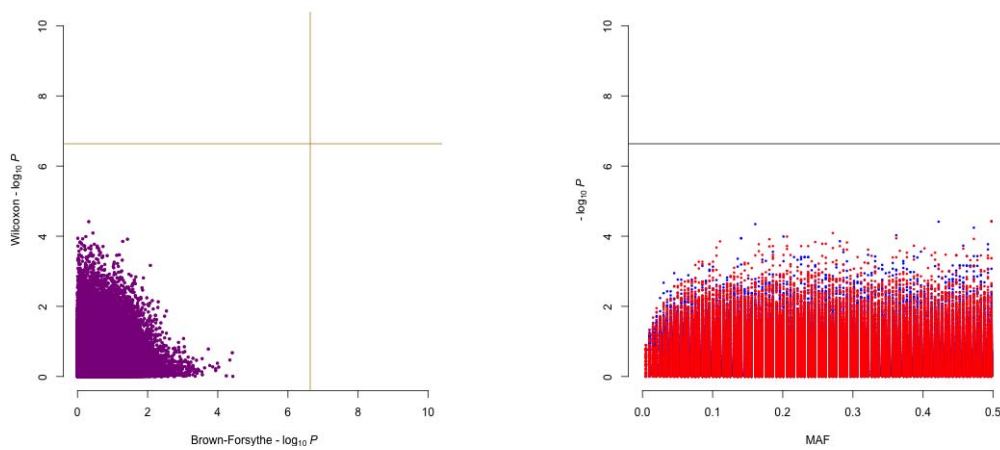

**Supplementary Figure B18 - Summary of vGWA results for 23: Fe56**

**Histogram of the phenotype & QQ plots of the Brown-Forsythe  $p$ -values  
(blue: nominal  $p$ -values, green: genomic controlled)**

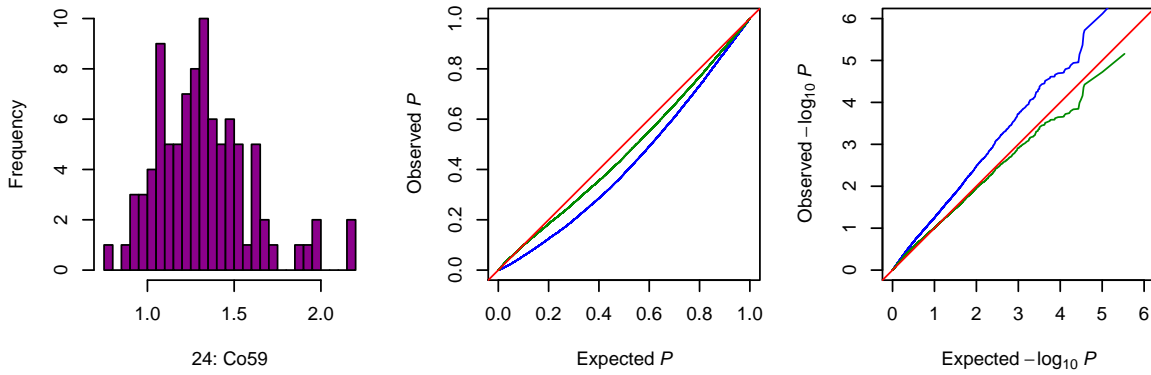

**Brown-Forsythe (colored, behind) & Wilcoxon (yellow, in front) results, genomic controlled**

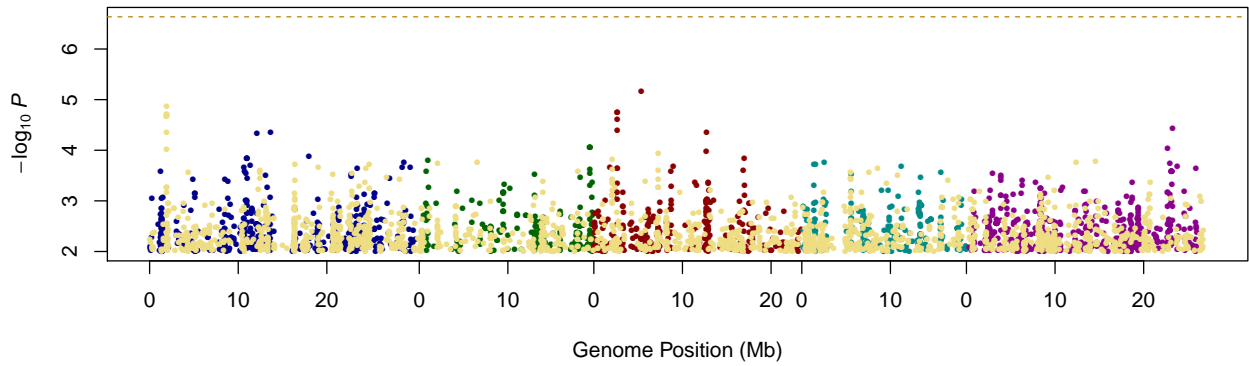

**Comparison of Brown-Forsythe & Wilcoxon  $p$ -values (MAF: minor allele frequency)**

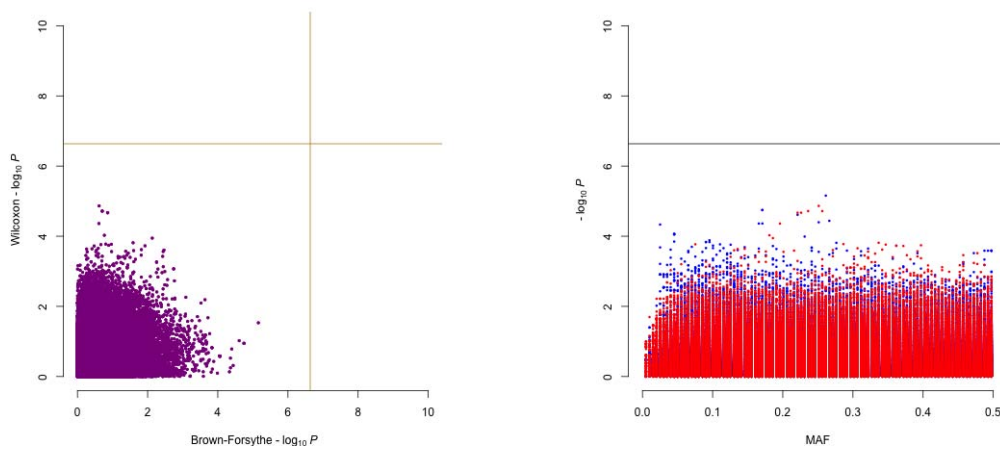

**Supplementary Figure B19 - Summary of vGWA results for 24: Co59**

**Histogram of the phenotype & QQ plots of the Brown-Forsythe  $p$ -values  
(blue: nominal  $p$ -values, green: genomic controlled)**

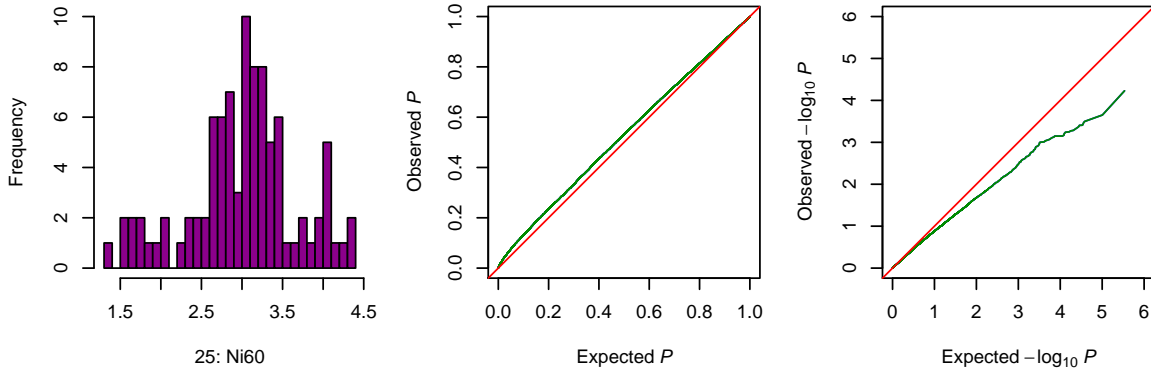

**Brown-Forsythe (colored, behind) & Wilcoxon (yellow, in front) results, genomic controlled**

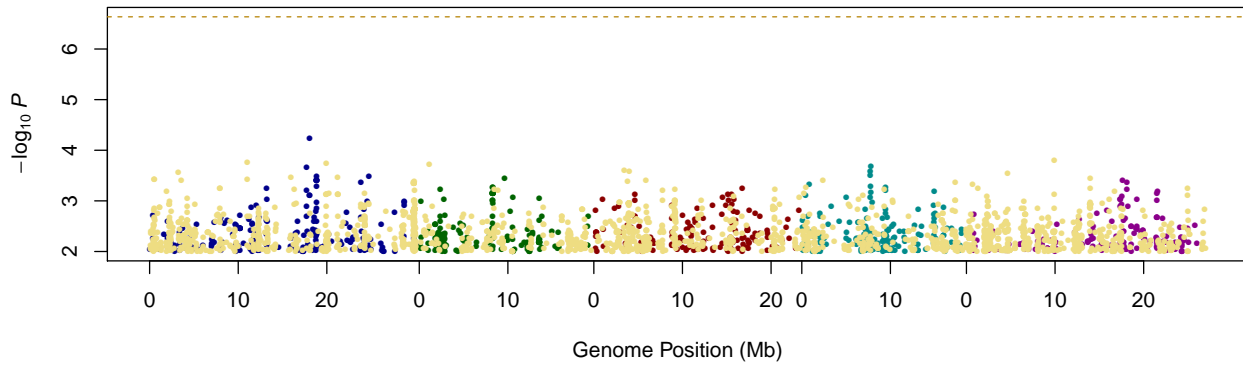

**Comparison of Brown-Forsythe & Wilcoxon  $p$ -values (MAF: minor allele frequency)**

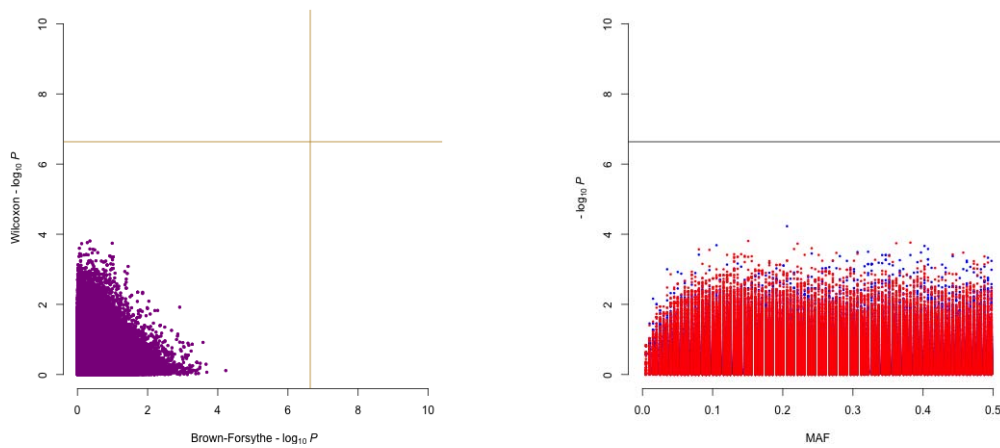

**Supplementary Figure B20 - Summary of vGWA results for 25: Ni60**

**Histogram of the phenotype & QQ plots of the Brown-Forsythe  $p$ -values  
(blue: nominal  $p$ -values, green: genomic controlled)**

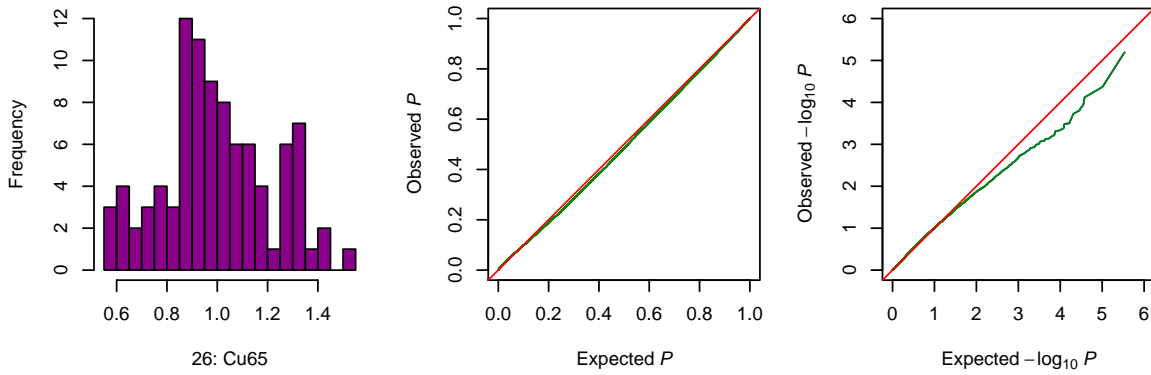

**Brown-Forsythe (colored, behind) & Wilcoxon (yellow, in front) results, genomic controlled**

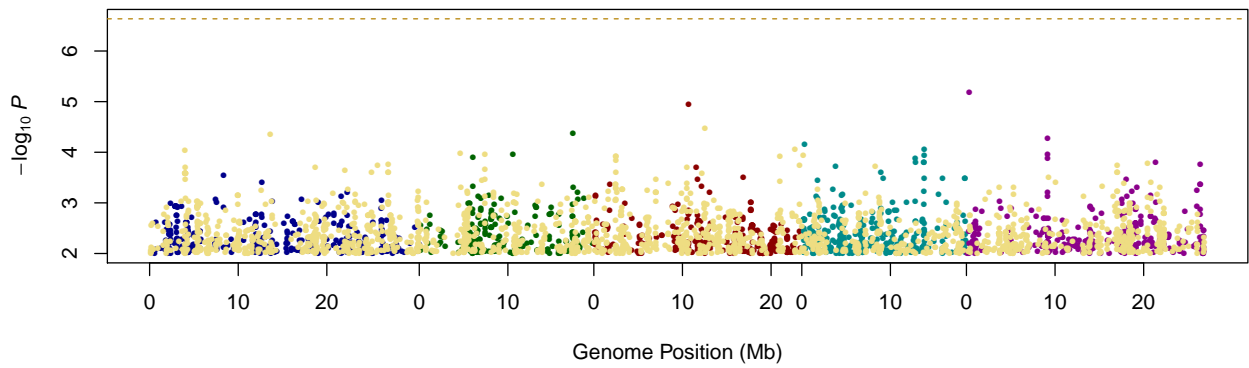

**Comparison of Brown-Forsythe & Wilcoxon  $p$ -values (MAF: minor allele frequency)**

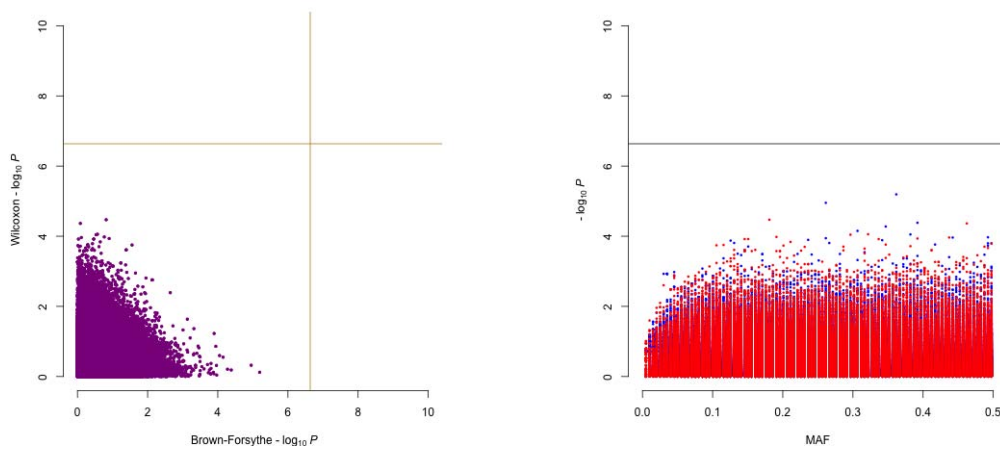

**Supplementary Figure B21 - Summary of vGWA results for 26: Cu65**

**Histogram of the phenotype & QQ plots of the Brown-Forsythe  $p$ -values  
(blue: nominal  $p$ -values, green: genomic controlled)**

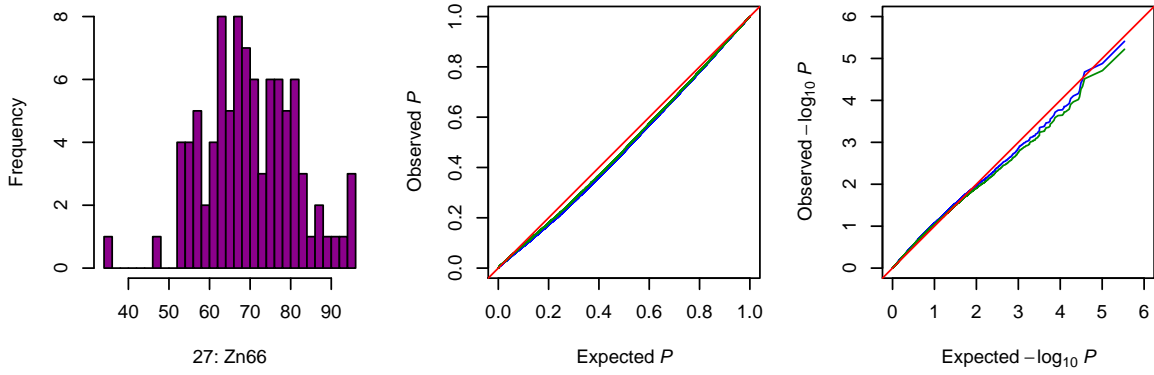

**Brown-Forsythe (colored, behind) & Wilcoxon (yellow, in front) results, genomic controlled**

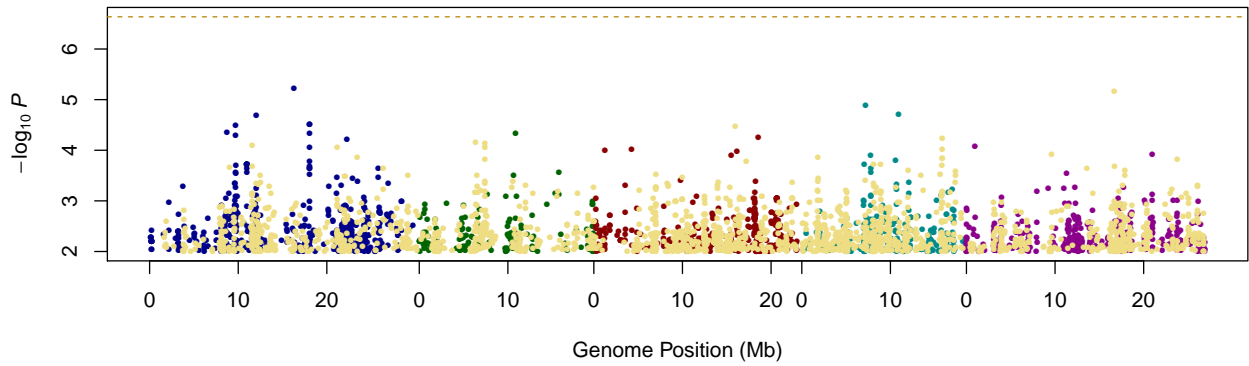

**Comparison of Brown-Forsythe & Wilcoxon  $p$ -values (MAF: minor allele frequency)**

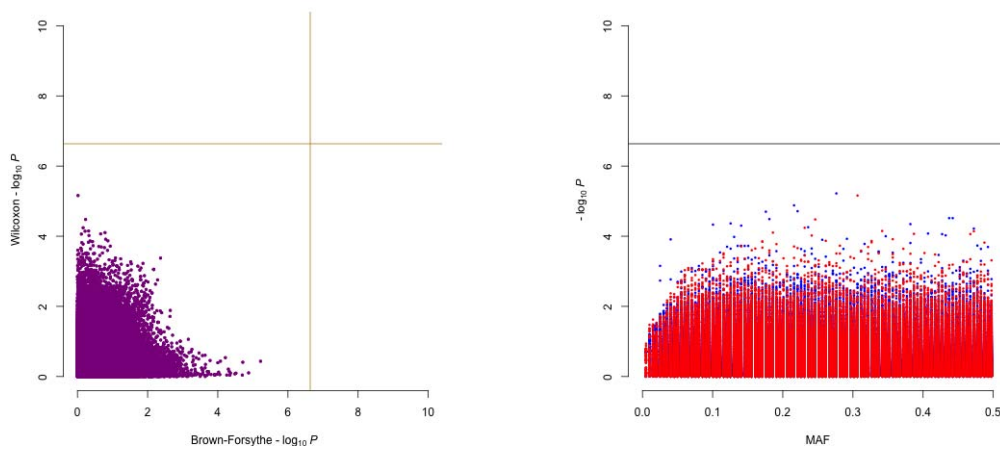

**Supplementary Figure B22 - Summary of vGWA results for 27: Zn66**

**Histogram of the phenotype & QQ plots of the Brown-Forsythe  $p$ -values  
(blue: nominal  $p$ -values, green: genomic controlled)**

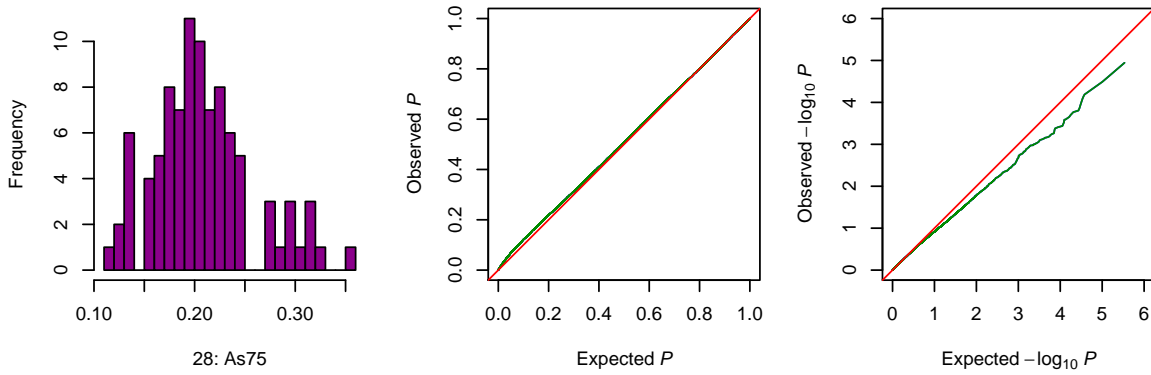

**Brown-Forsythe (colored, behind) & Wilcoxon (yellow, in front) results, genomic controlled**

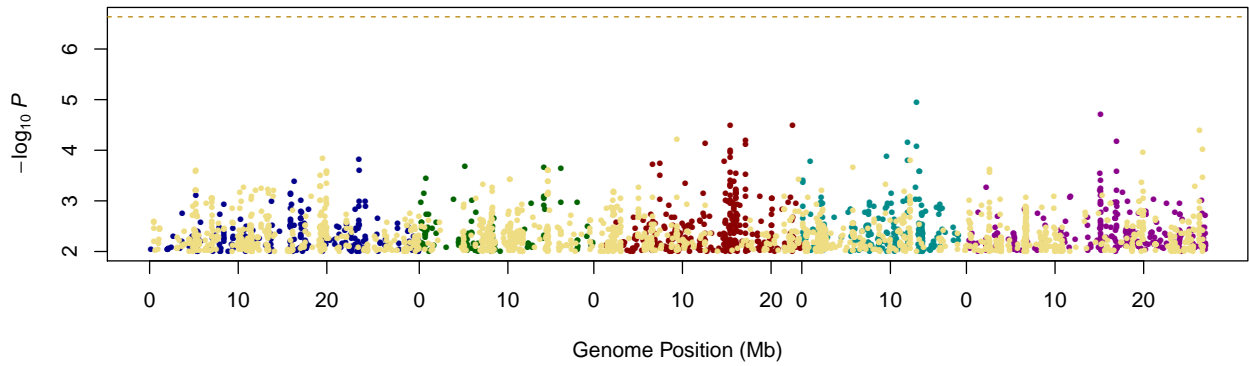

**Comparison of Brown-Forsythe & Wilcoxon  $p$ -values (MAF: minor allele frequency)**

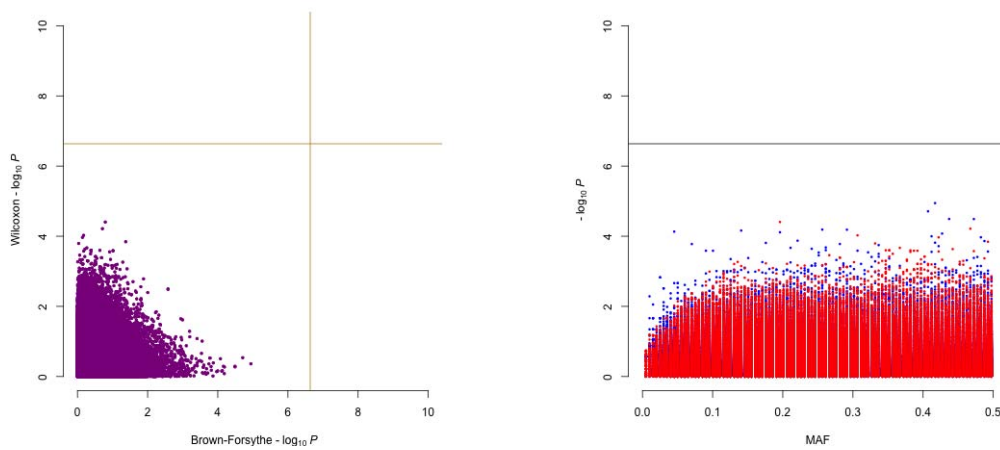

**Supplementary Figure B23 - Summary of vGWA results for 28: As75**

**Histogram of the phenotype & QQ plots of the Brown-Forsythe  $p$ -values  
(blue: nominal  $p$ -values, green: genomic controlled)**

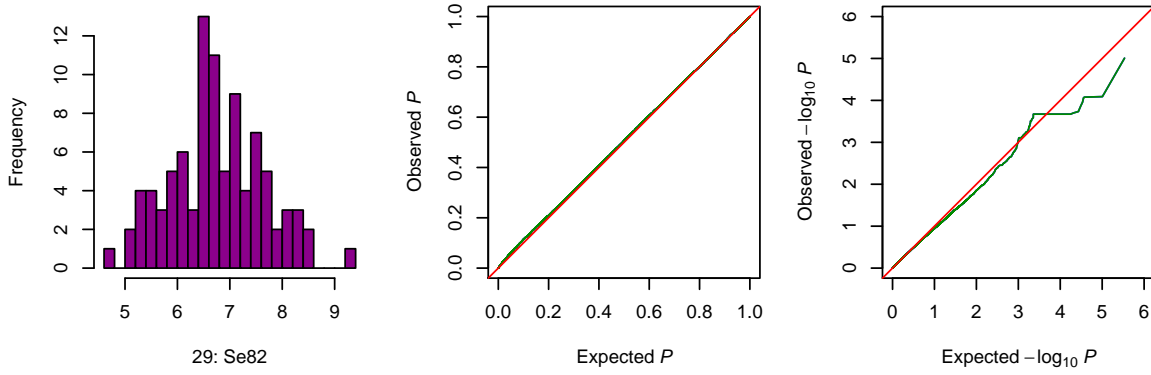

**Brown-Forsythe (colored, behind) & Wilcoxon (yellow, in front) results, genomic controlled**

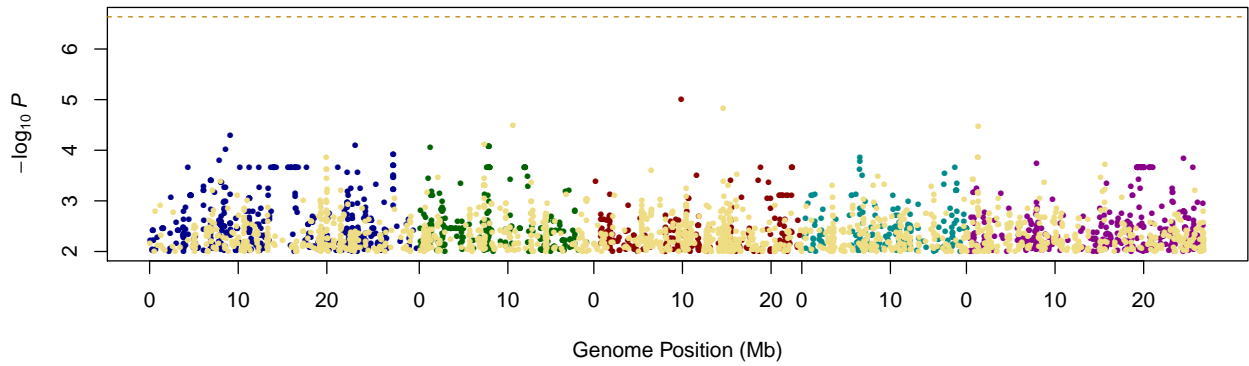

**Comparison of Brown-Forsythe & Wilcoxon  $p$ -values (MAF: minor allele frequency)**

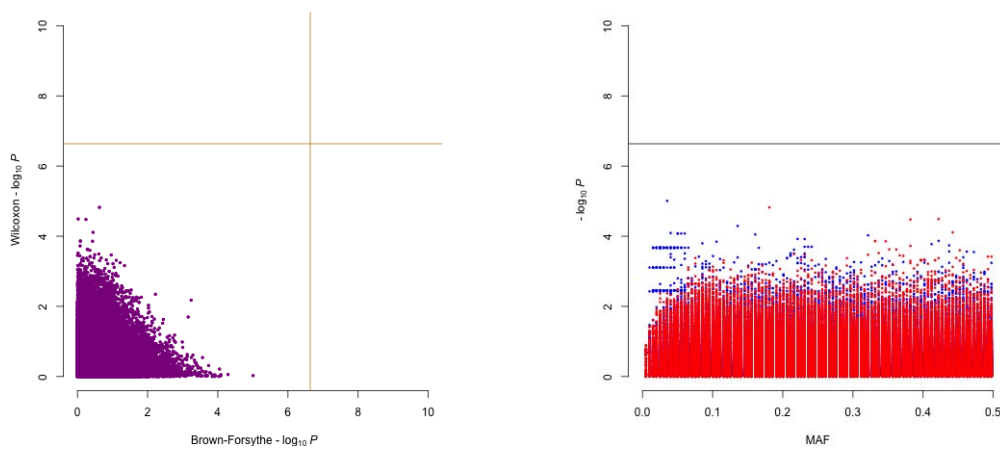

**Supplementary Figure B24 - Summary of vGWA results for 29: Se82**



**Histogram of the phenotype & QQ plots of the Brown-Forsythe  $p$ -values  
(blue: nominal  $p$ -values, green: genomic controlled)**

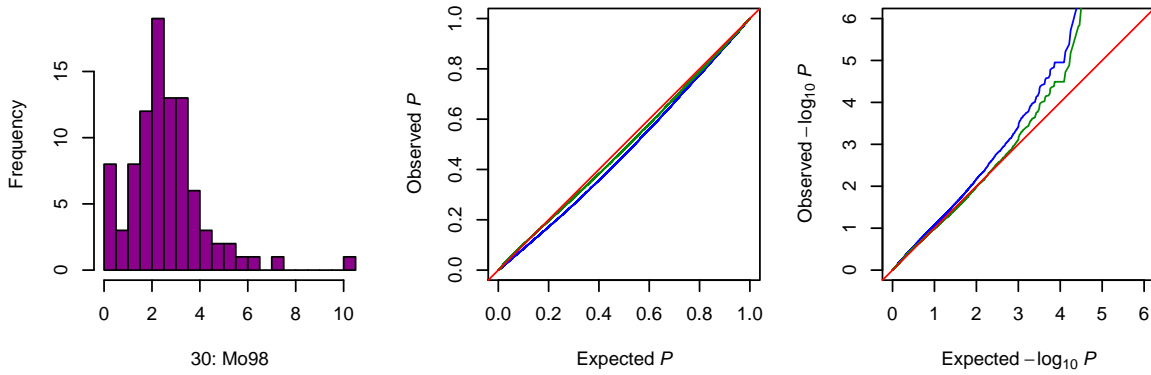

**Brown-Forsythe (colored, behind) & Wilcoxon (yellow, in front) results, genomic controlled**

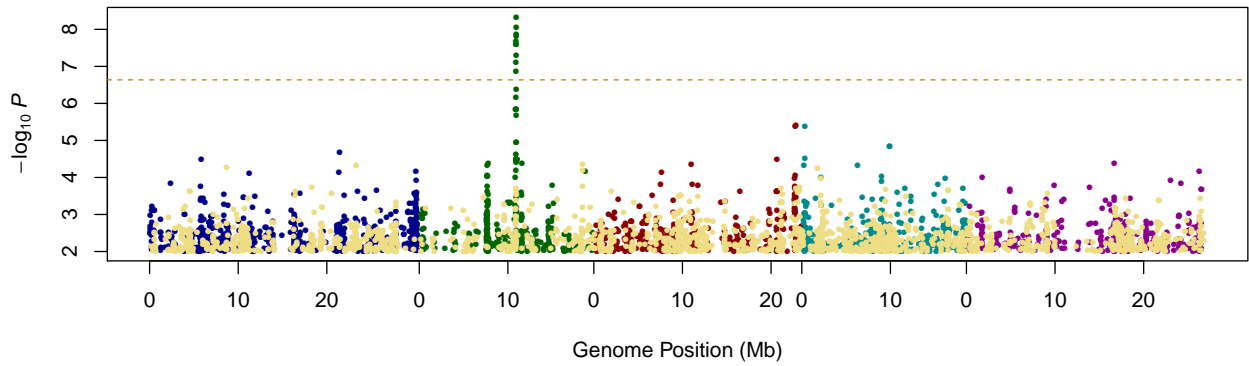

**Comparison of Brown-Forsythe & Wilcoxon  $p$ -values (MAF: minor allele frequency)**

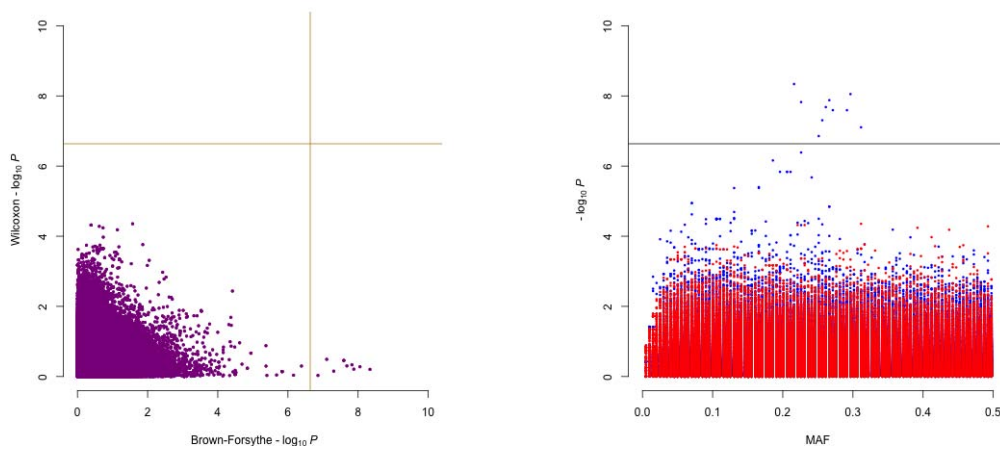

**Supplementary Figure B25 - Summary of vGWA results for 30: Mo98**

**Histogram of the phenotype & QQ plots of the Brown-Forsythe  $p$ -values  
(blue: nominal  $p$ -values, green: genomic controlled)**

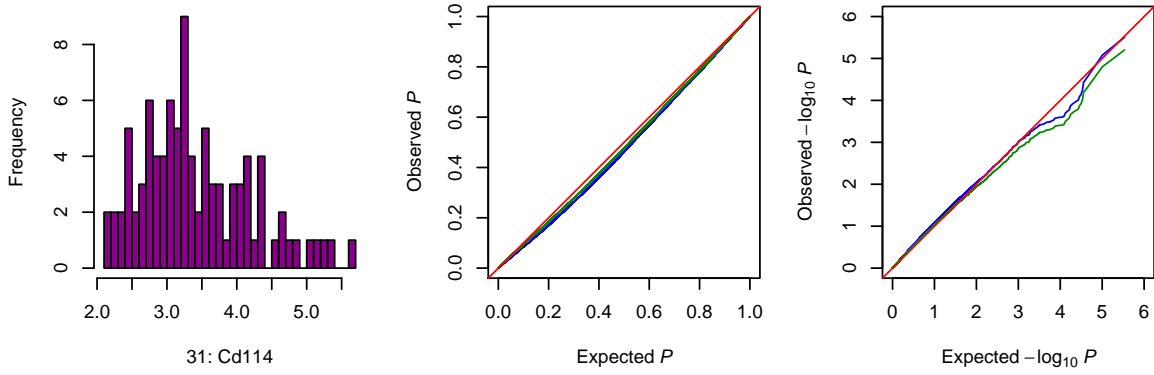

**Brown-Forsythe (colored, behind) & Wilcoxon (yellow, in front) results, genomic controlled**

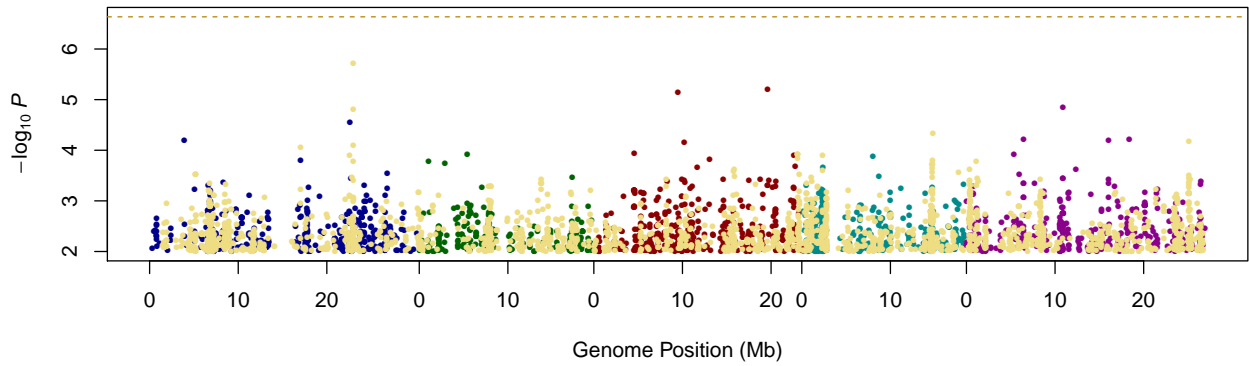

**Comparison of Brown-Forsythe & Wilcoxon  $p$ -values (MAF: minor allele frequency)**

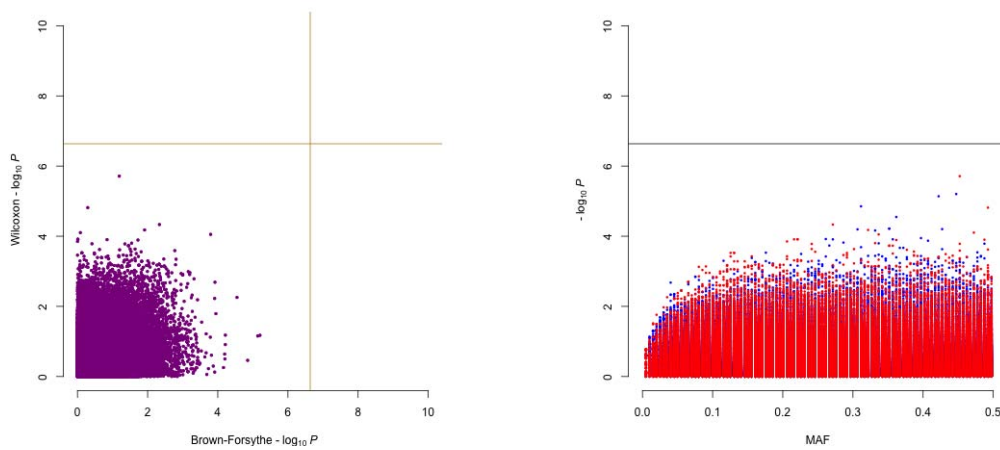

**Supplementary Figure B26 - Summary of vGWA results for 31: Cd114**

**Histogram of the phenotype & QQ plots of the Brown-Forsythe  $p$ -values  
(blue: nominal  $p$ -values, green: genomic controlled)**

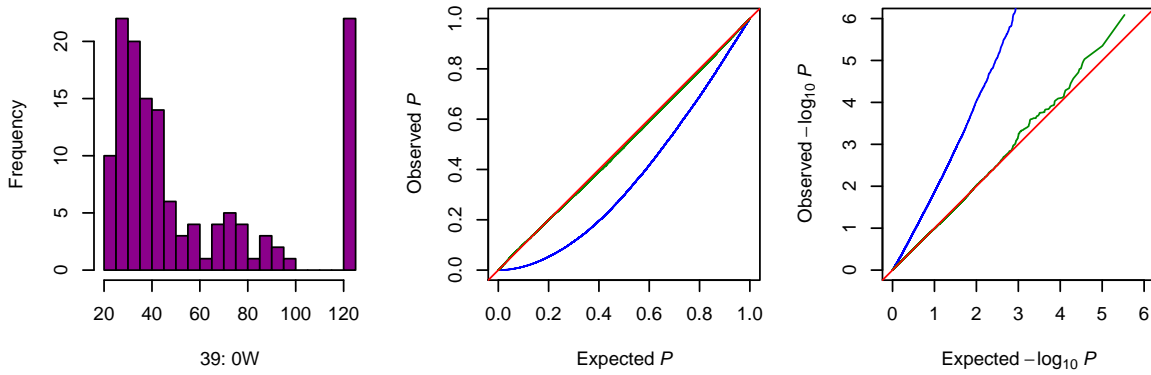

**Brown-Forsythe (colored, behind) & Wilcoxon (yellow, in front) results, genomic controlled**

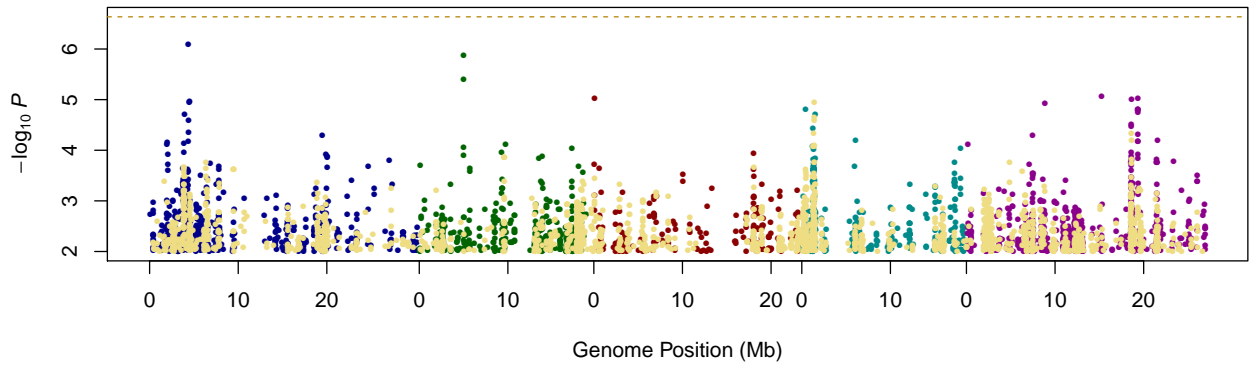

**Comparison of Brown-Forsythe & Wilcoxon  $p$ -values (MAF: minor allele frequency)**

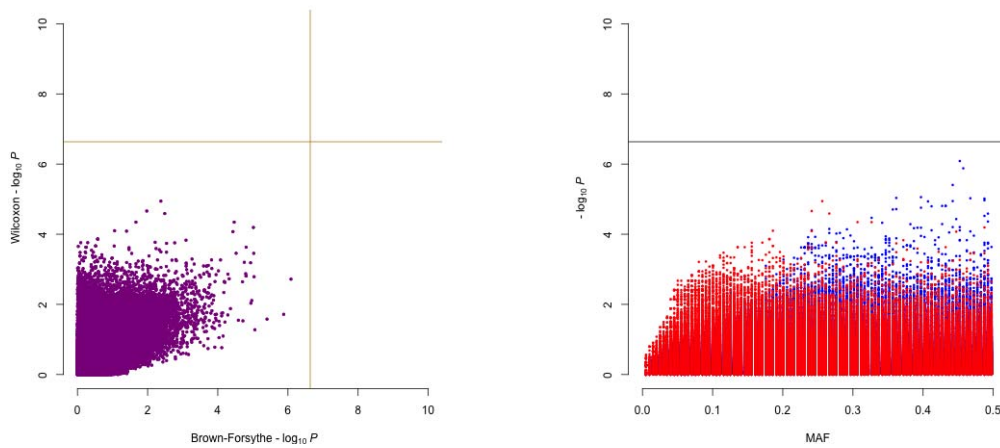

**Supplementary Figure B27 - Summary of vGWA results for 39: OW**

**Histogram of the phenotype & QQ plots of the Brown-Forsythe  $p$ -values  
(blue: nominal  $p$ -values, green: genomic controlled)**

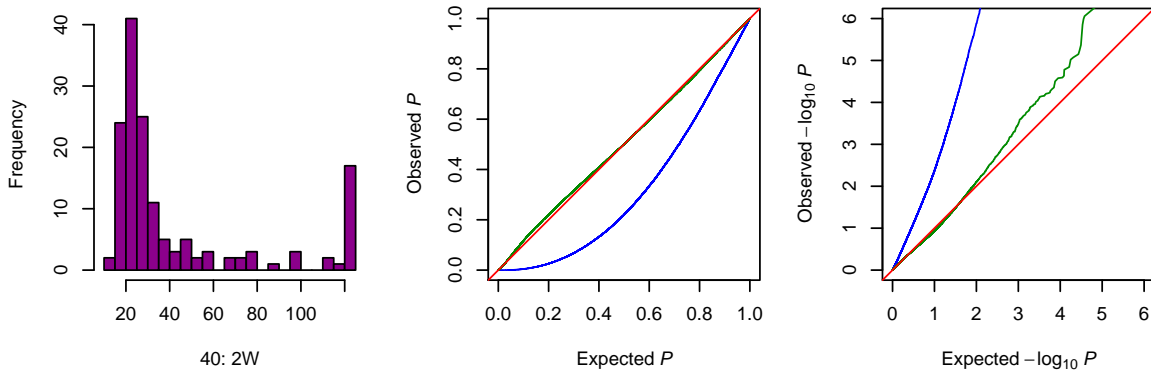

**Brown-Forsythe (colored, behind) & Wilcoxon (yellow, in front) results, genomic controlled**

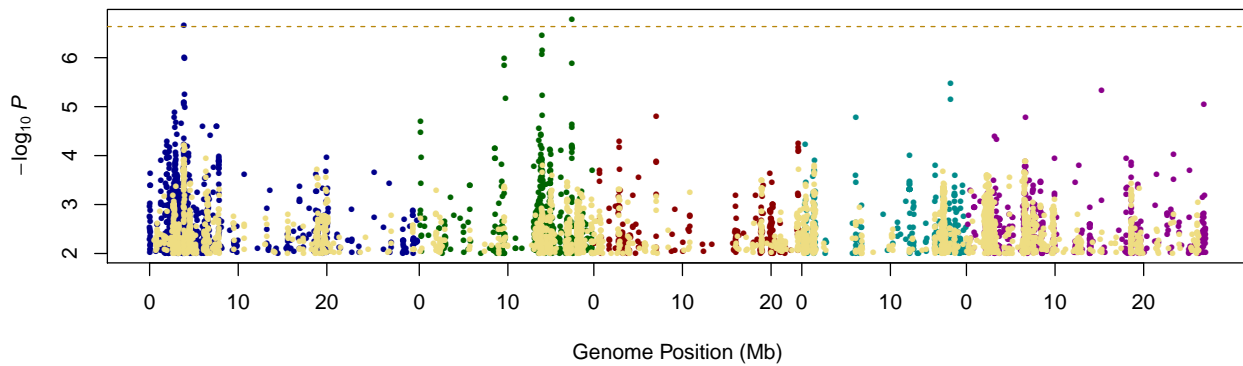

**Comparison of Brown-Forsythe & Wilcoxon  $p$ -values (MAF: minor allele frequency)**

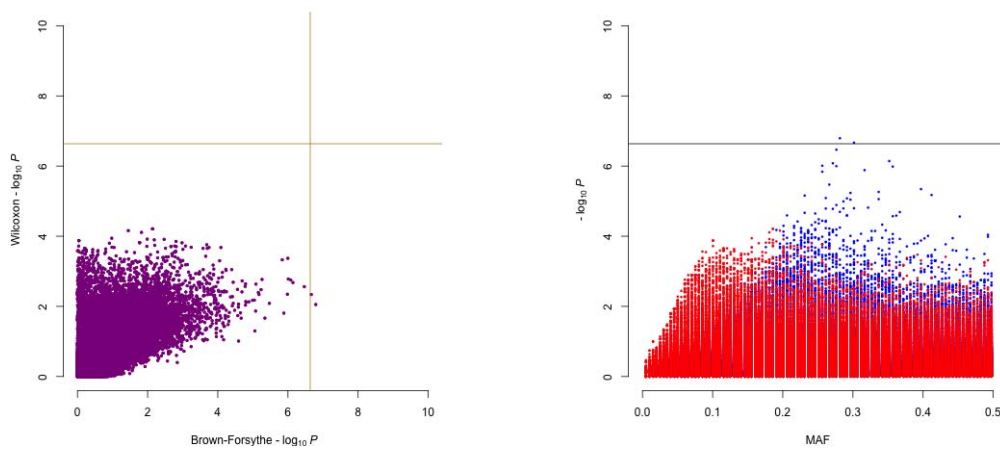

**Supplementary Figure B28 - Summary of vGWA results for 40: 2W**

**Histogram of the phenotype & QQ plots of the Brown-Forsythe  $p$ -values  
(blue: nominal  $p$ -values, green: genomic controlled)**

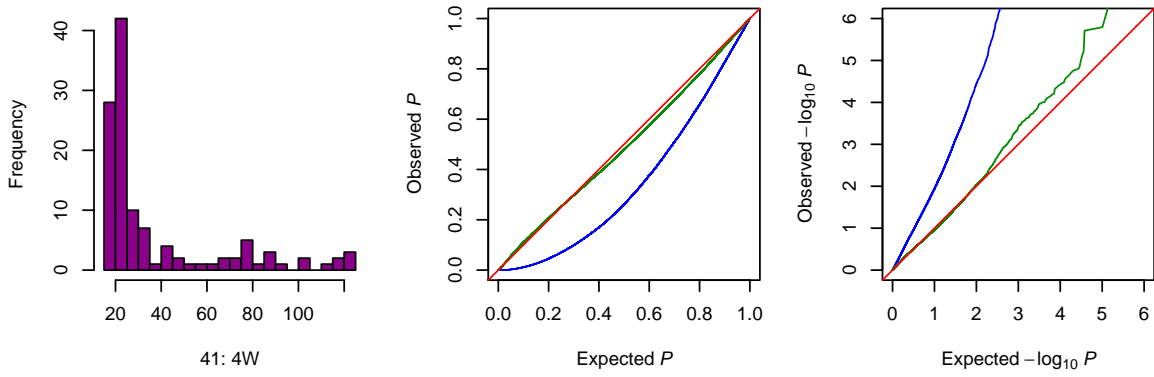

**Brown-Forsythe (colored, behind) & Wilcoxon (yellow, in front) results, genomic controlled**

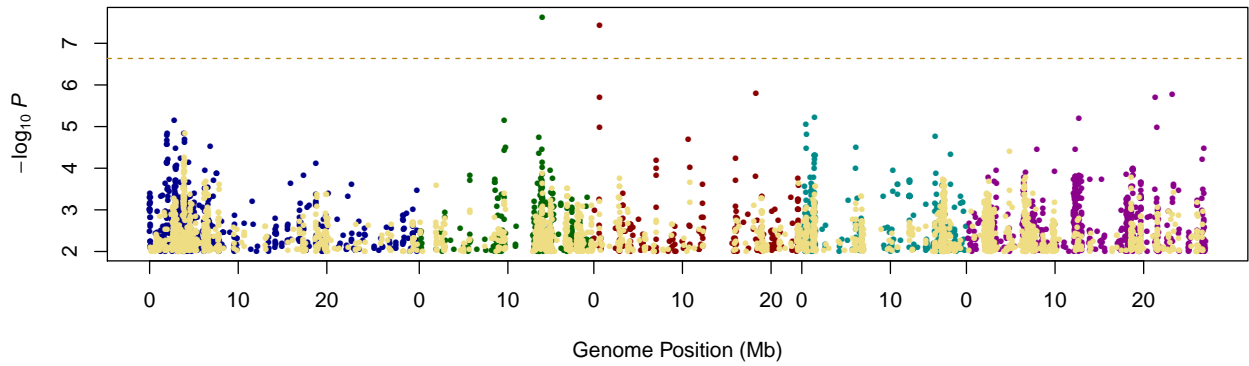

**Comparison of Brown-Forsythe & Wilcoxon  $p$ -values (MAF: minor allele frequency)**

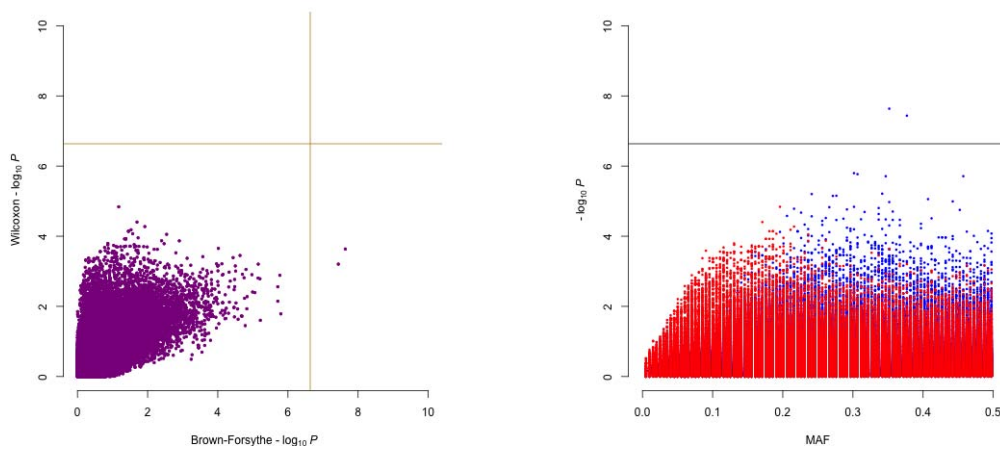

**Supplementary Figure B29 - Summary of vGWA results for 41: 4W**

**Histogram of the phenotype & QQ plots of the Brown-Forsythe  $p$ -values  
(blue: nominal  $p$ -values, green: genomic controlled)**

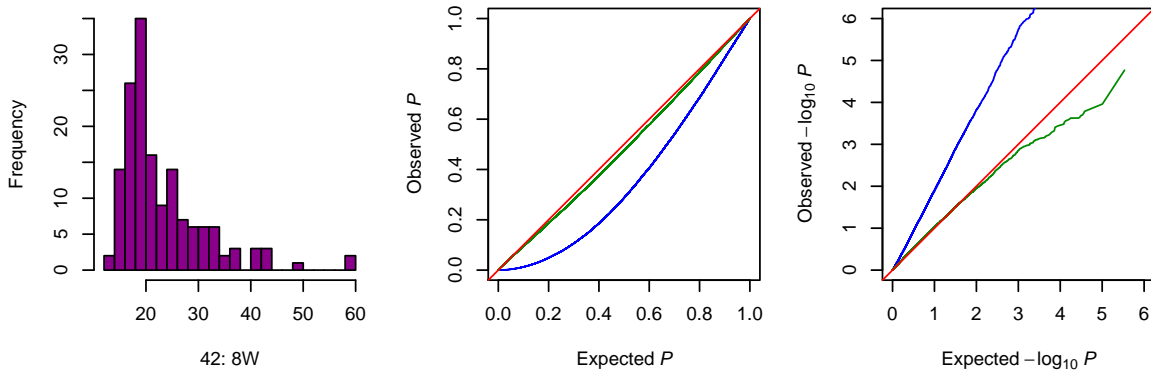

**Brown-Forsythe (colored, behind) & Wilcoxon (yellow, in front) results, genomic controlled**

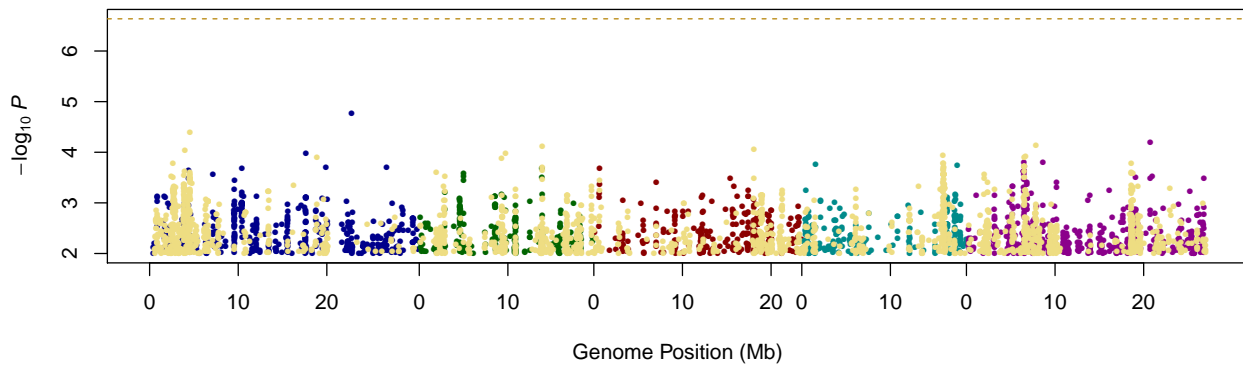

**Comparison of Brown-Forsythe & Wilcoxon  $p$ -values (MAF: minor allele frequency)**

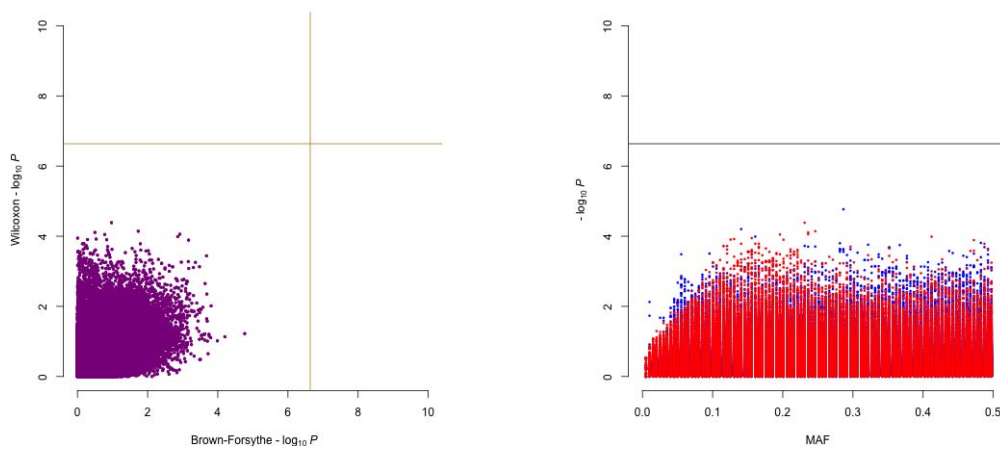

**Supplementary Figure B30 - Summary of vGWA results for 42: 8W**

**Histogram of the phenotype & QQ plots of the Brown-Forsythe  $p$ -values  
(blue: nominal  $p$ -values, green: genomic controlled)**

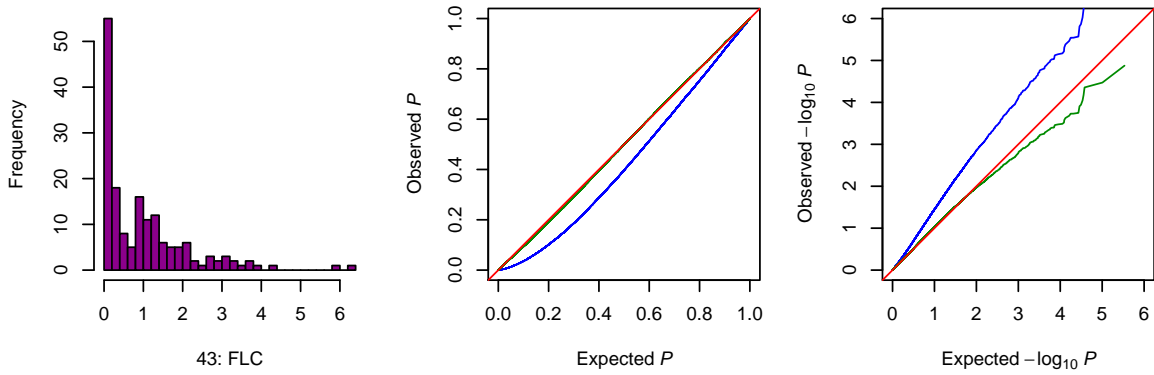

**Brown-Forsythe (colored, behind) & Wilcoxon (yellow, in front) results, genomic controlled**

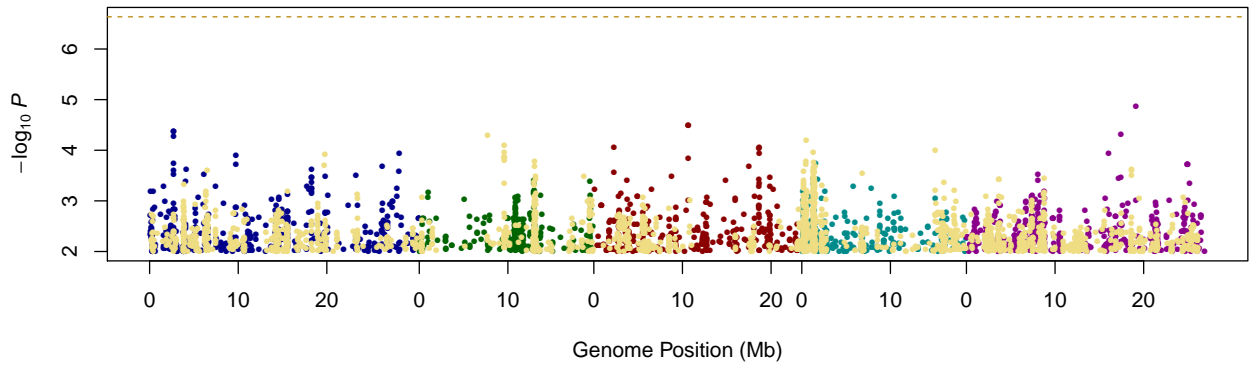

**Comparison of Brown-Forsythe & Wilcoxon  $p$ -values (MAF: minor allele frequency)**

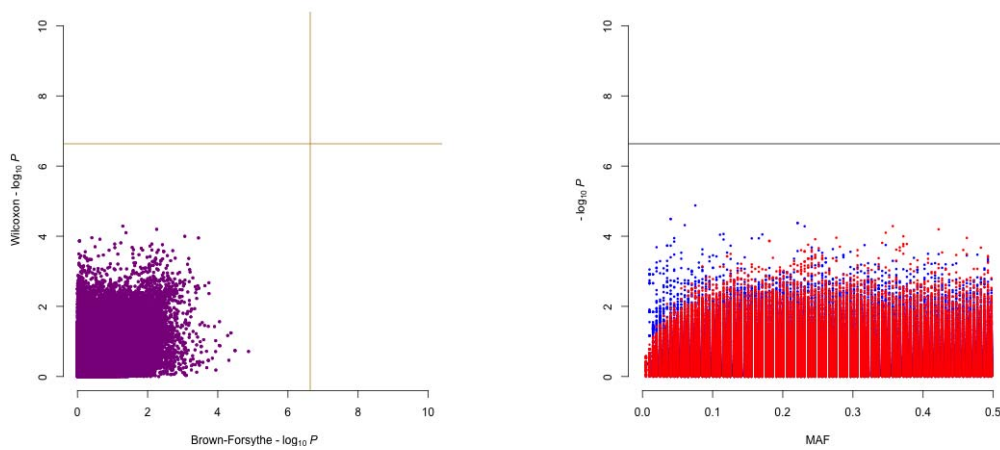

**Supplementary Figure B31 - Summary of vGWA results for 43: FLC**

**Histogram of the phenotype & QQ plots of the Brown-Forsythe  $p$ -values  
(blue: nominal  $p$ -values, green: genomic controlled)**

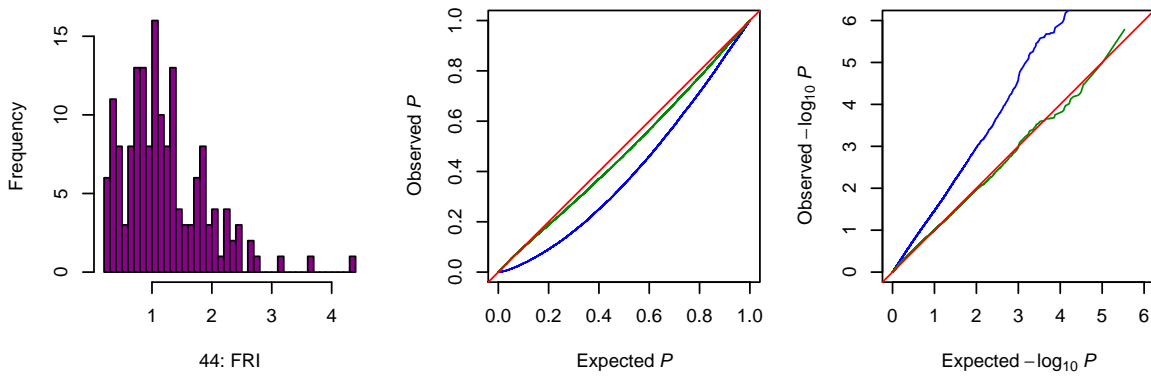

**Brown-Forsythe (colored, behind) & Wilcoxon (yellow, in front) results, genomic controlled**

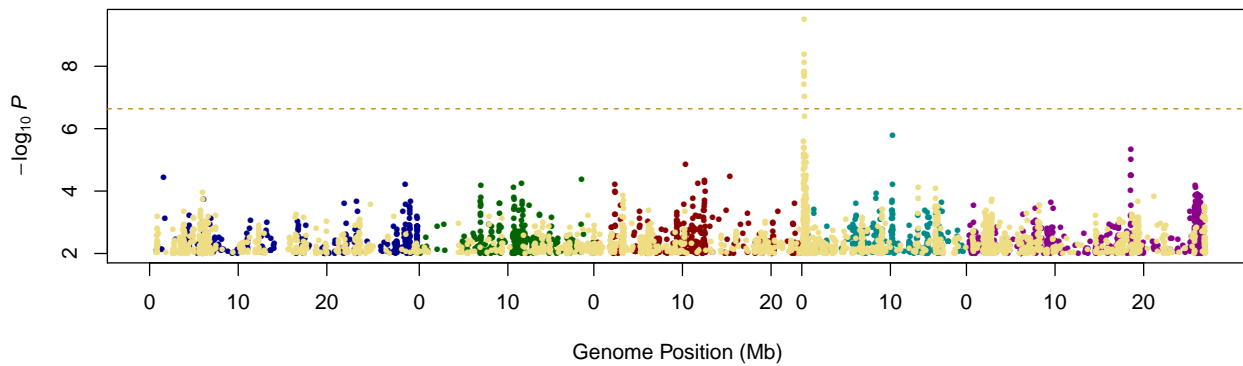

**Comparison of Brown-Forsythe & Wilcoxon  $p$ -values (MAF: minor allele frequency)**

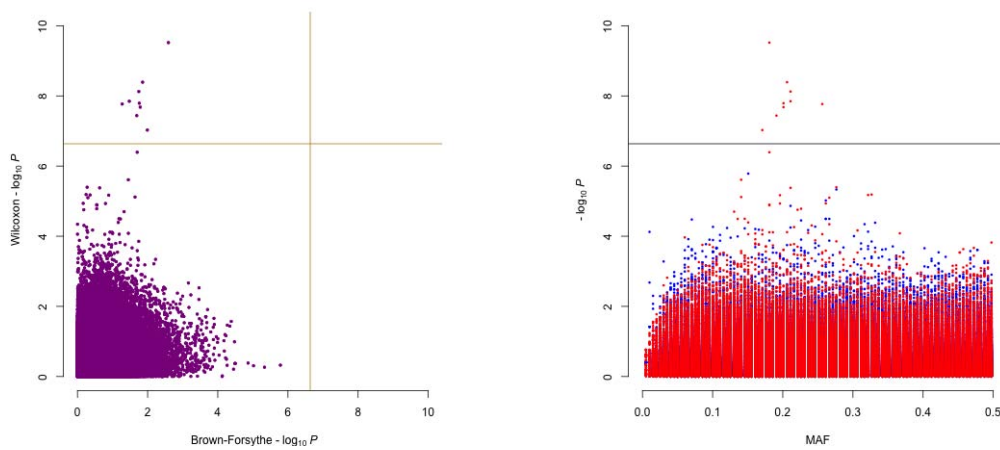

**Supplementary Figure B32 - Summary of vGWA results for 44: FRI**



**Histogram of the phenotype & QQ plots of the Brown-Forsythe  $p$ -values  
(blue: nominal  $p$ -values, green: genomic controlled)**

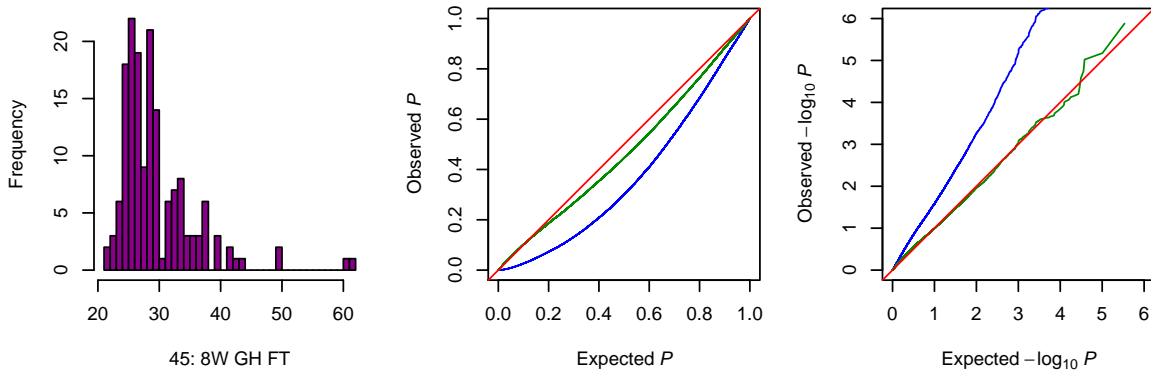

**Brown-Forsythe (colored, behind) & Wilcoxon (yellow, in front) results, genomic controlled**

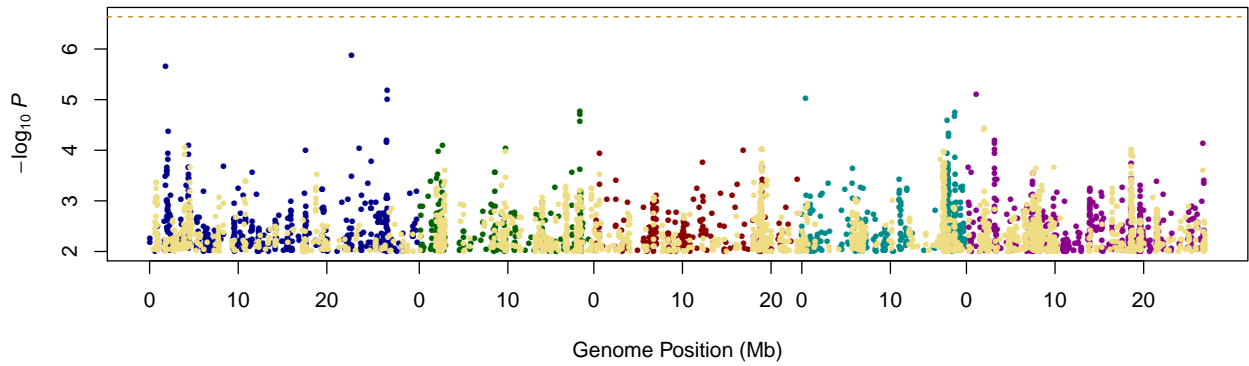

**Comparison of Brown-Forsythe & Wilcoxon  $p$ -values (MAF: minor allele frequency)**

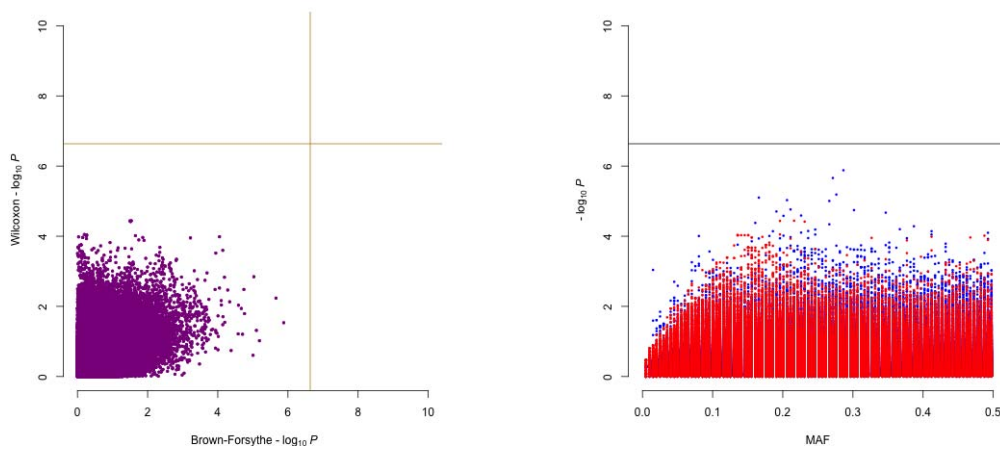

**Supplementary Figure B33 - Summary of vGWA results for 45: 8W GH FT**

**Histogram of the phenotype & QQ plots of the Brown-Forsythe  $p$ -values  
(blue: nominal  $p$ -values, green: genomic controlled)**

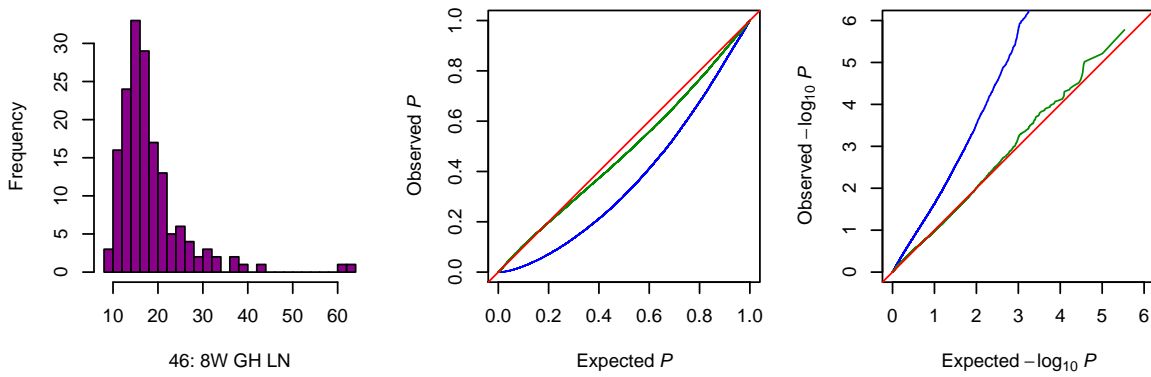

**Brown-Forsythe (colored, behind) & Wilcoxon (yellow, in front) results, genomic controlled**

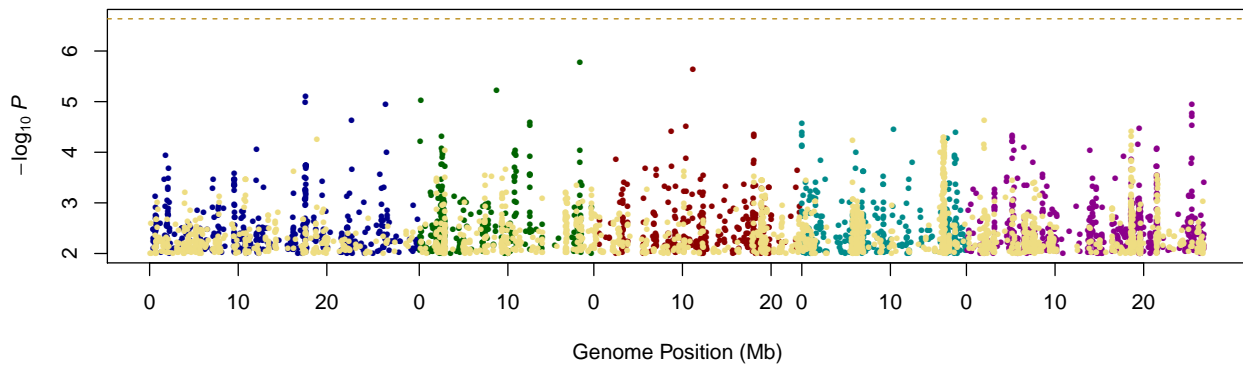

**Comparison of Brown-Forsythe & Wilcoxon  $p$ -values (MAF: minor allele frequency)**

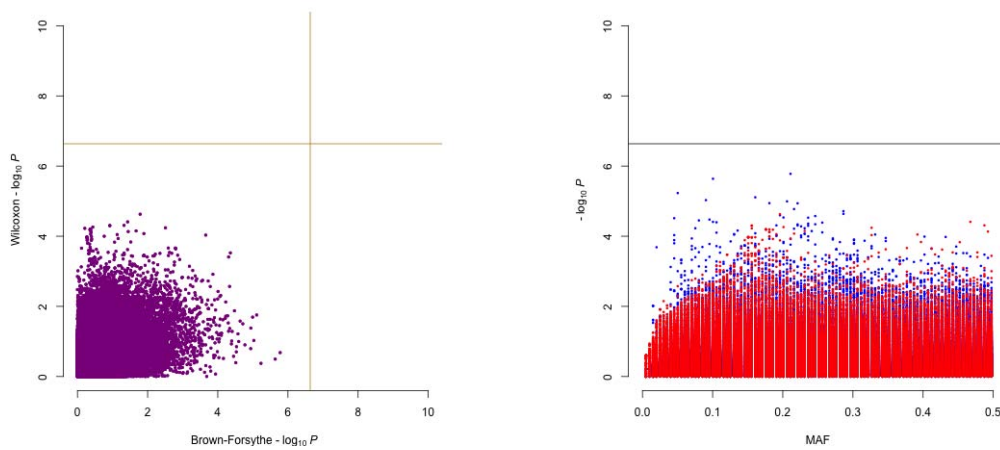

**Supplementary Figure B34 - Summary of vGWA results for 46: 8W GH LN**

**Histogram of the phenotype & QQ plots of the Brown-Forsythe  $p$ -values  
(blue: nominal  $p$ -values, green: genomic controlled)**

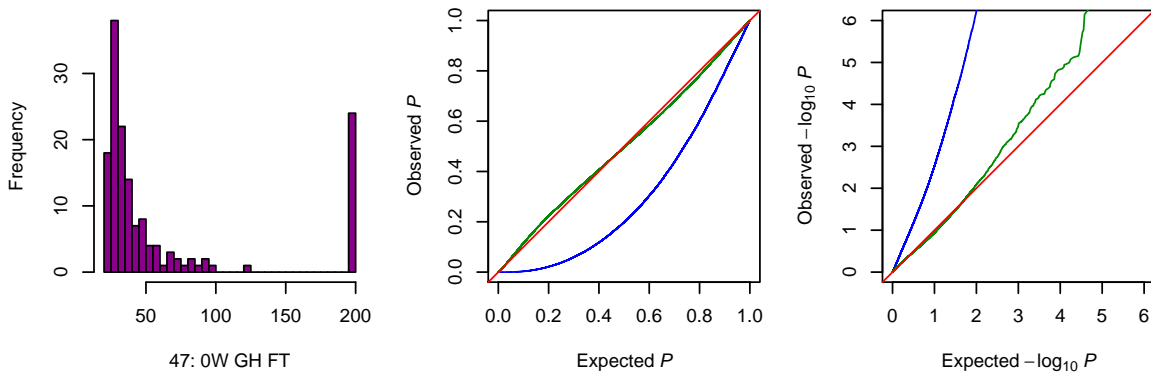

**Brown-Forsythe (colored, behind) & Wilcoxon (yellow, in front) results, genomic controlled**

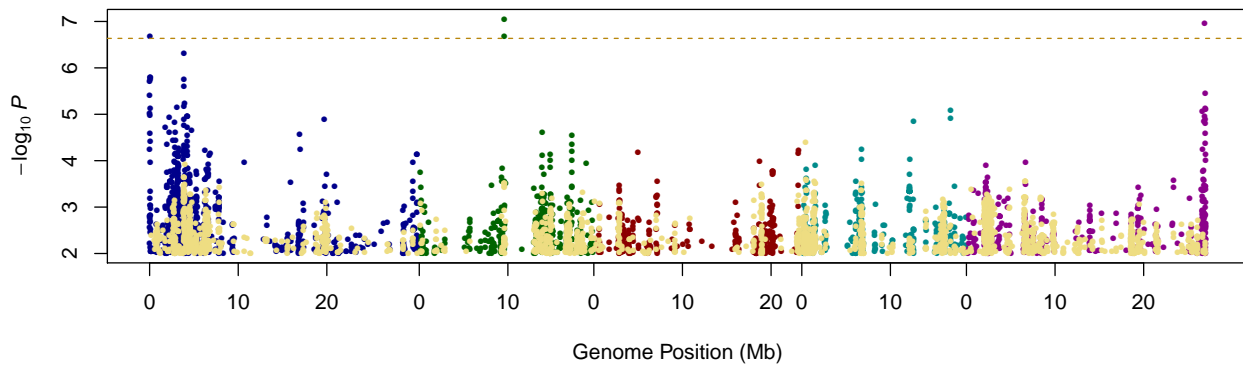

**Comparison of Brown-Forsythe & Wilcoxon  $p$ -values (MAF: minor allele frequency)**

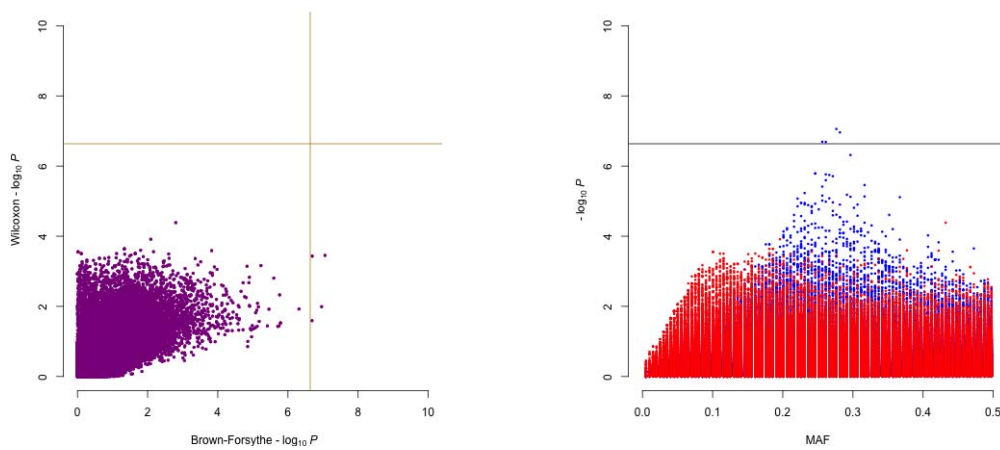

**Supplementary Figure B35 - Summary of vGWA results for 47: 0W GH FT**

**Histogram of the phenotype & QQ plots of the Brown-Forsythe  $p$ -values  
(blue: nominal  $p$ -values, green: genomic controlled)**

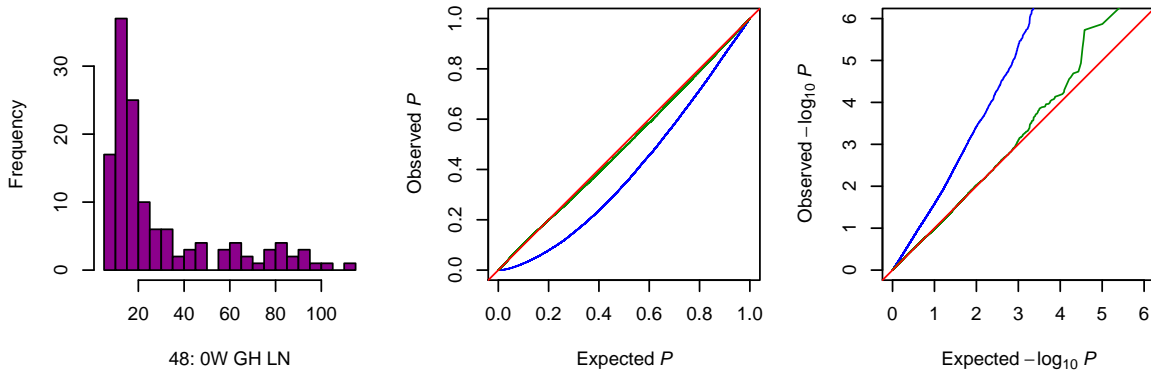

**Brown-Forsythe (colored, behind) & Wilcoxon (yellow, in front) results, genomic controlled**

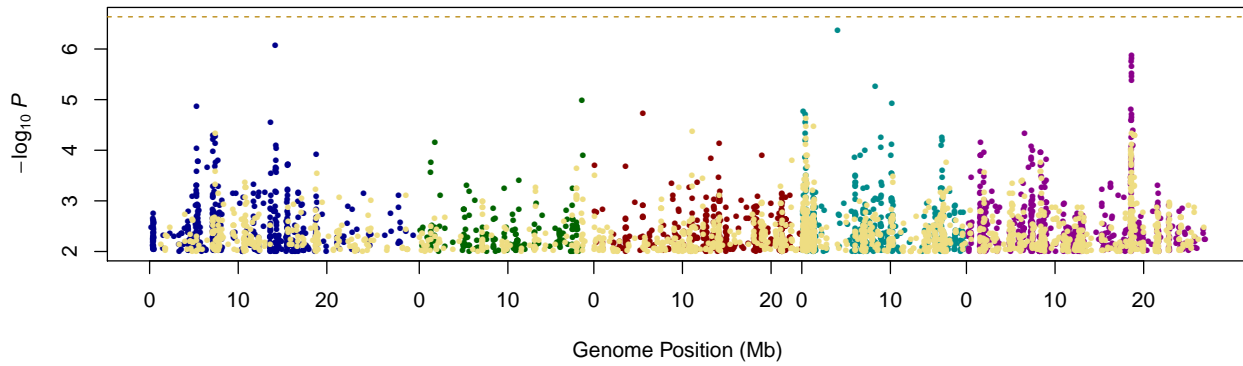

**Comparison of Brown-Forsythe & Wilcoxon  $p$ -values (MAF: minor allele frequency)**

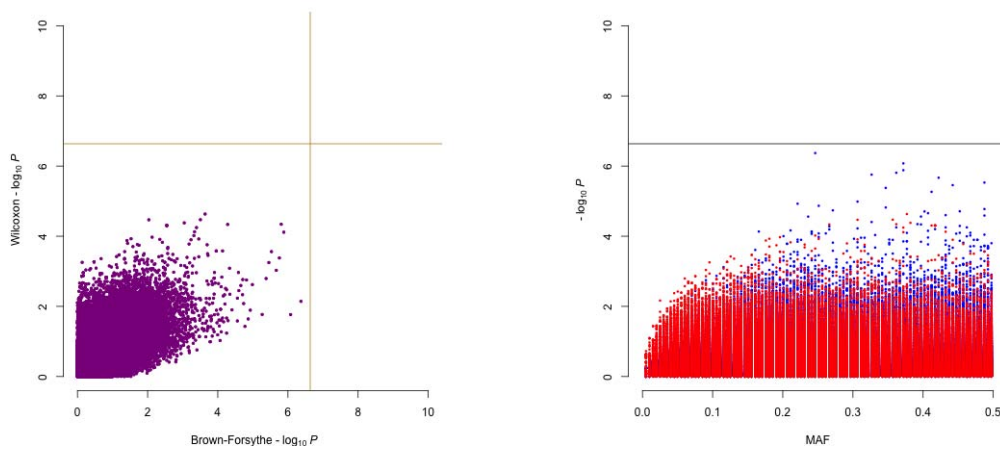

**Supplementary Figure B36 - Summary of vGWA results for 48: 0W GH LN**

**Histogram of the phenotype & QQ plots of the Brown-Forsythe  $p$ -values  
(blue: nominal  $p$ -values, green: genomic controlled)**

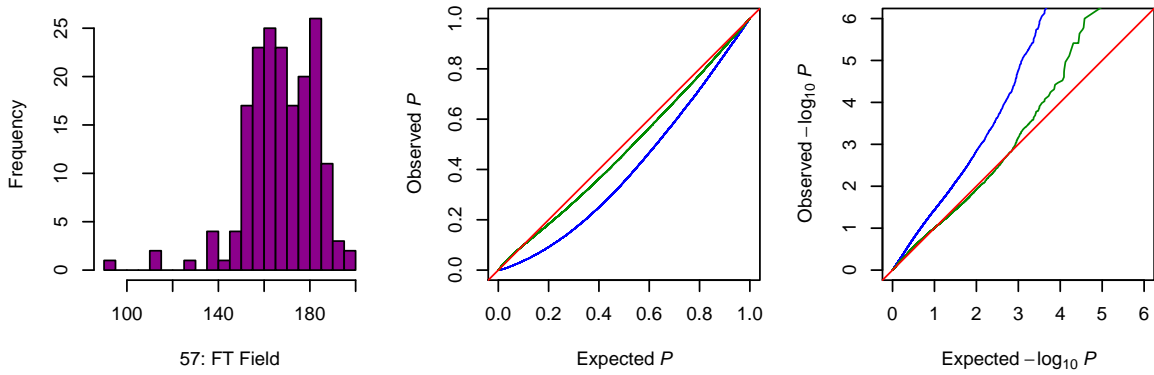

**Brown-Forsythe (colored, behind) & Wilcoxon (yellow, in front) results, genomic controlled**

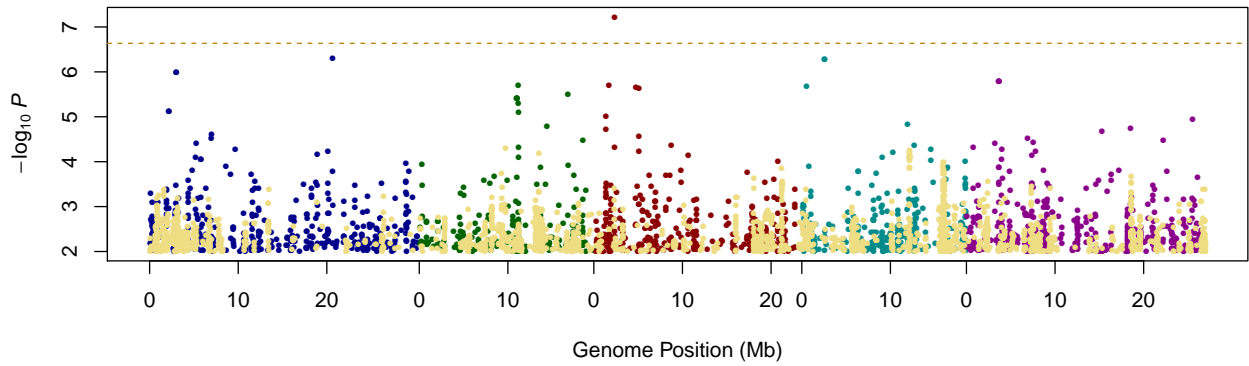

**Comparison of Brown-Forsythe & Wilcoxon  $p$ -values (MAF: minor allele frequency)**

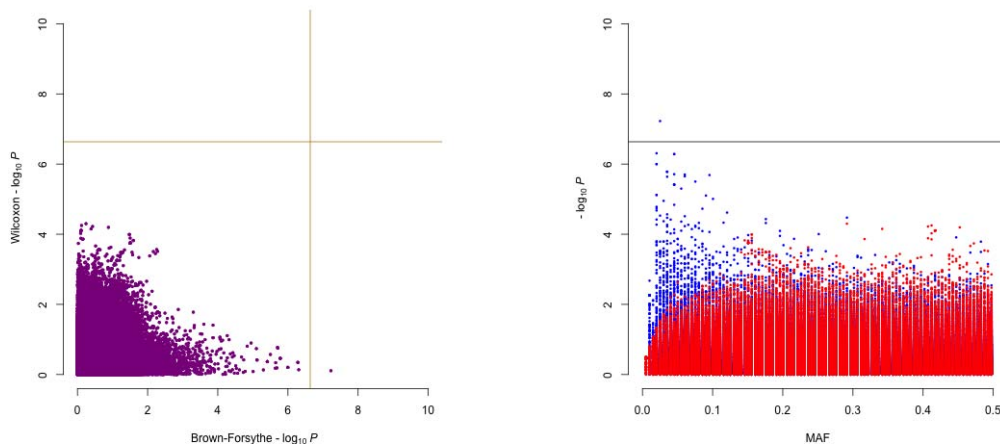

**Supplementary Figure B37 - Summary of vGWA results for 57: FT Field**

**Histogram of the phenotype & QQ plots of the Brown-Forsythe  $p$ -values  
(blue: nominal  $p$ -values, green: genomic controlled)**

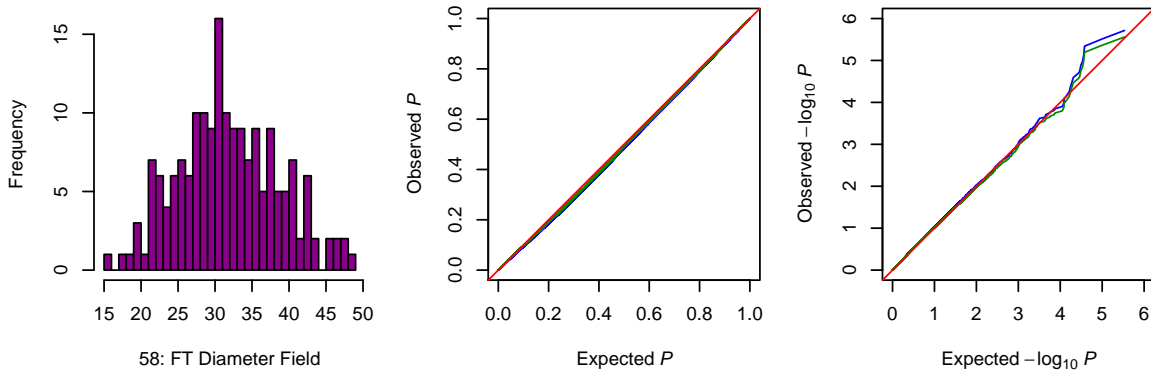

**Brown-Forsythe (colored, behind) & Wilcoxon (yellow, in front) results, genomic controlled**

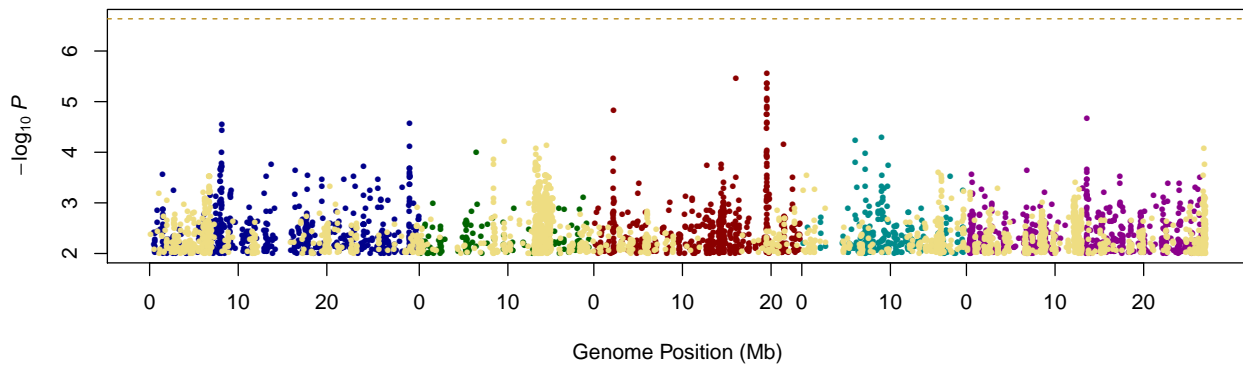

**Comparison of Brown-Forsythe & Wilcoxon  $p$ -values (MAF: minor allele frequency)**

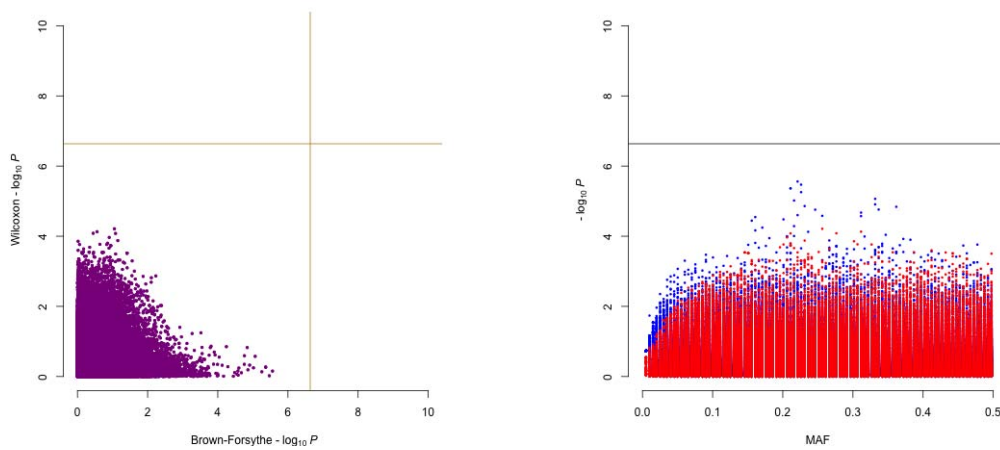

**Supplementary Figure B38 - Summary of vGWA results for 58: FT Diameter Field**

**Histogram of the phenotype & QQ plots of the Brown-Forsythe  $p$ -values (blue: nominal  $p$ -values, green: genomic controlled)**

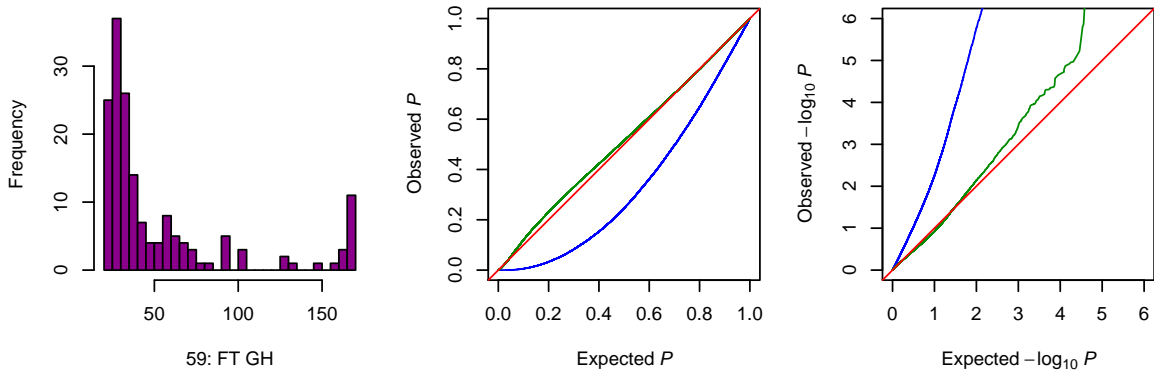

**Brown-Forsythe (colored, behind) & Wilcoxon (yellow, in front) results, genomic controlled**

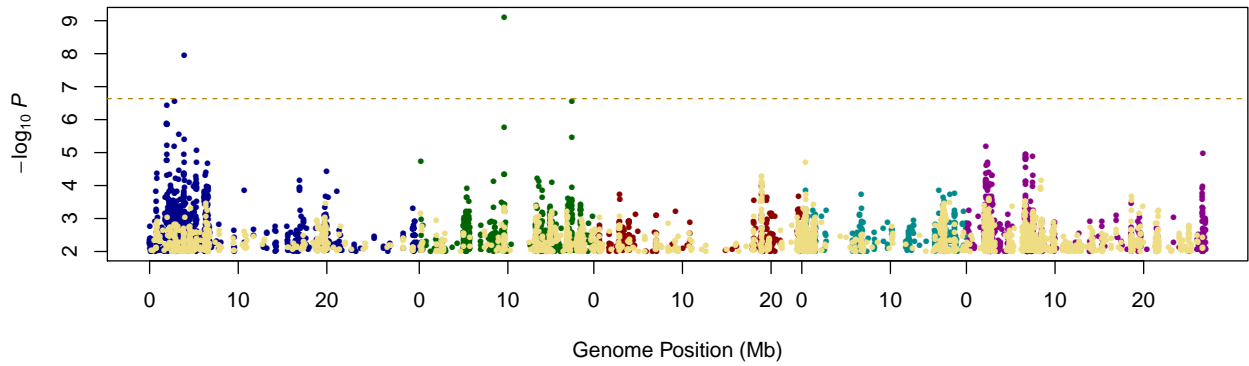

**Comparison of Brown-Forsythe & Wilcoxon  $p$ -values (MAF: minor allele frequency)**

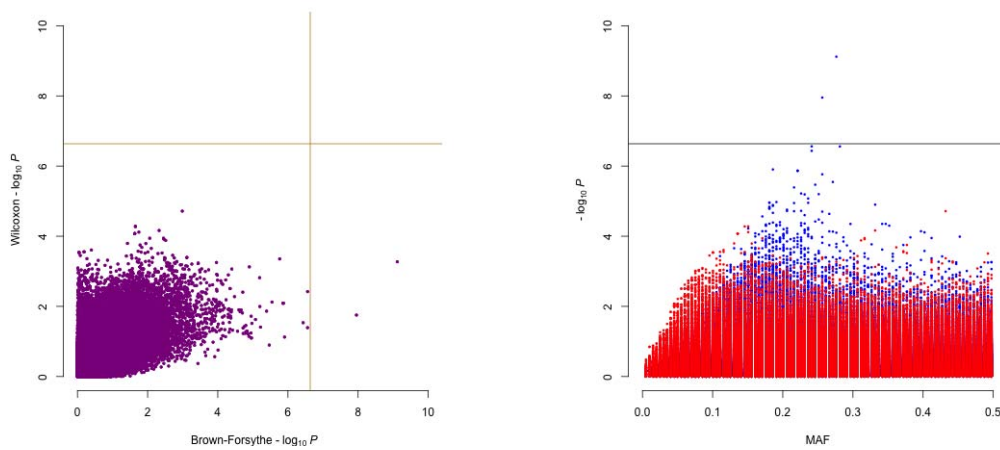

**Supplementary Figure B39 - Summary of vGWA results for 59: FT GH**

**Histogram of the phenotype & QQ plots of the Brown-Forsythe  $p$ -values  
(blue: nominal  $p$ -values, green: genomic controlled)**

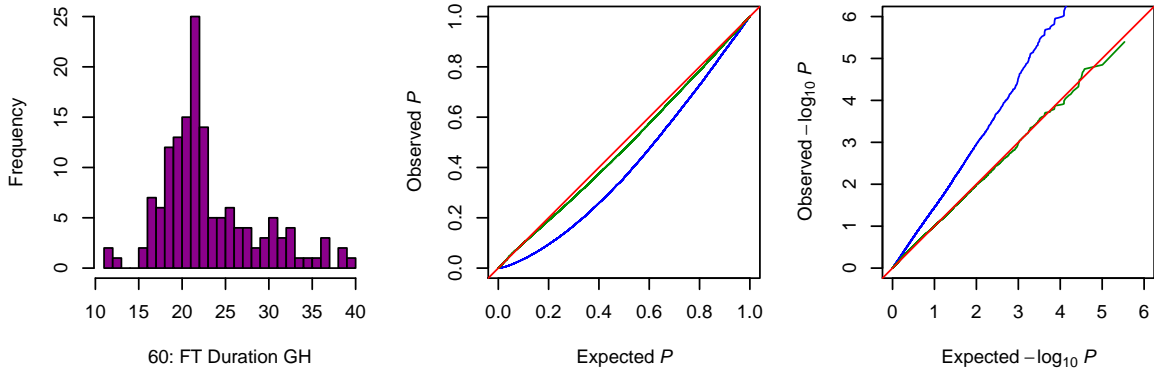

**Brown-Forsythe (colored, behind) & Wilcoxon (yellow, in front) results, genomic controlled**

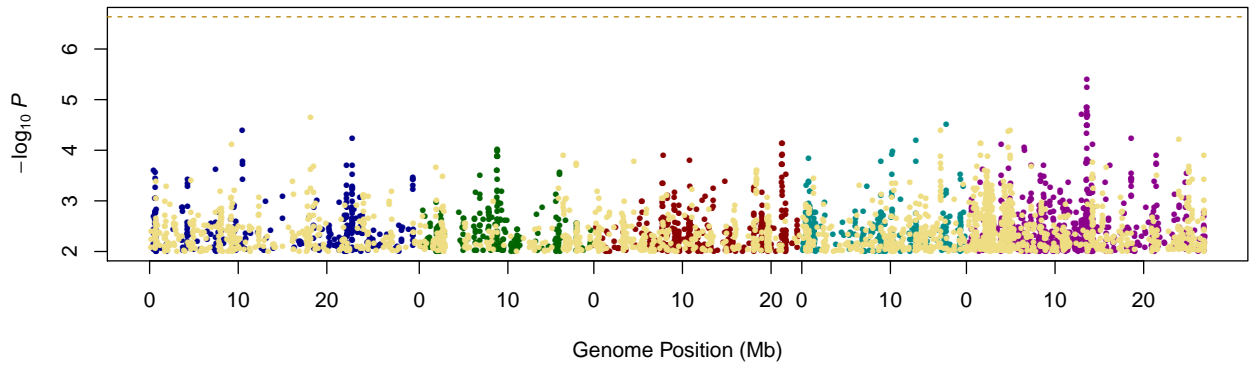

**Comparison of Brown-Forsythe & Wilcoxon  $p$ -values (MAF: minor allele frequency)**

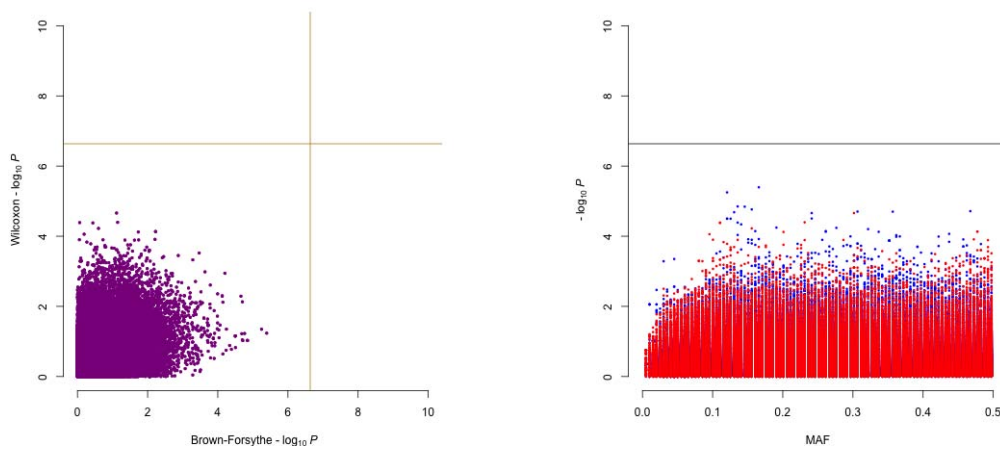

**Supplementary Figure B40 - Summary of vGWA results for 60: FT Duration GH**



**Histogram of the phenotype & QQ plots of the Brown-Forsythe  $p$ -values  
(blue: nominal  $p$ -values, green: genomic controlled)**

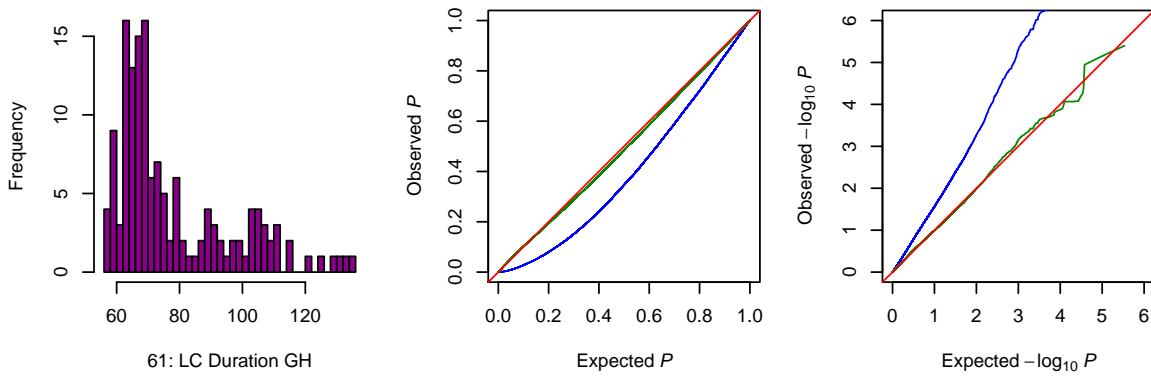

**Brown-Forsythe (colored, behind) & Wilcoxon (yellow, in front) results, genomic controlled**

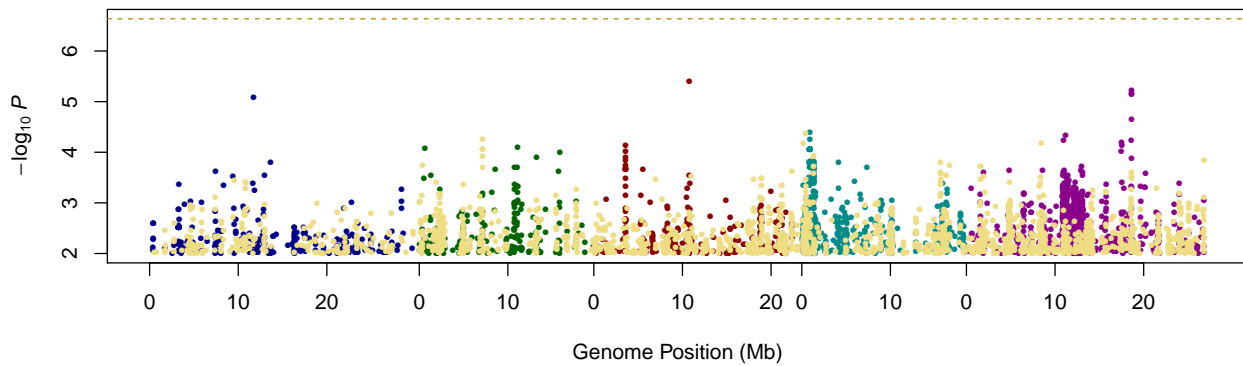

**Comparison of Brown-Forsythe & Wilcoxon  $p$ -values (MAF: minor allele frequency)**

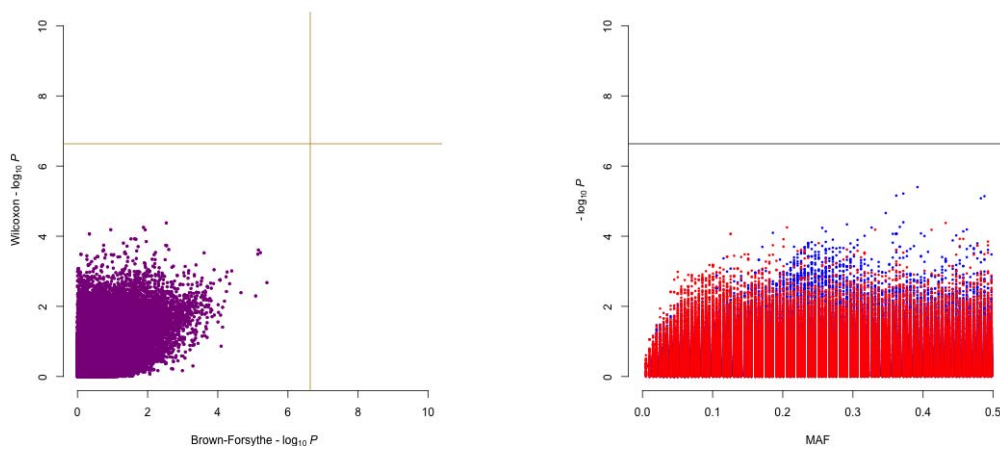

**Supplementary Figure B41 - Summary of vGWA results for 61: LC Duration GH**

**Histogram of the phenotype & QQ plots of the Brown-Forsythe  $p$ -values  
(blue: nominal  $p$ -values, green: genomic controlled)**

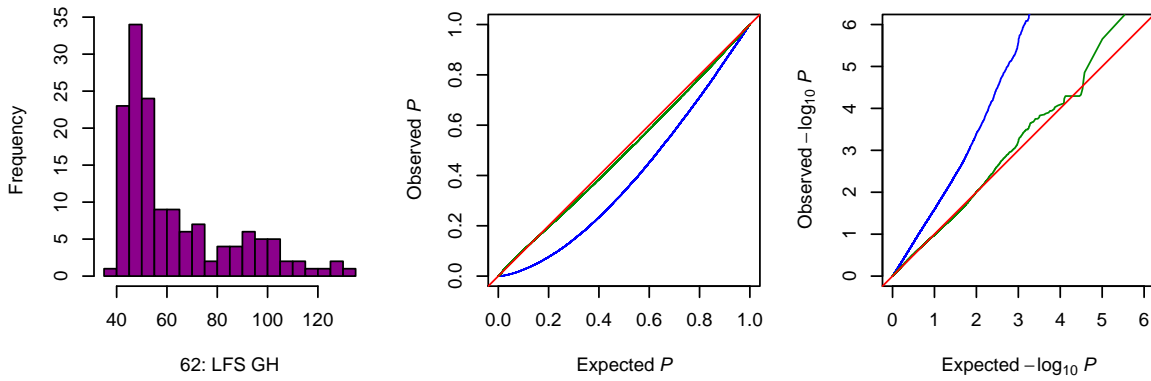

**Brown-Forsythe (colored, behind) & Wilcoxon (yellow, in front) results, genomic controlled**

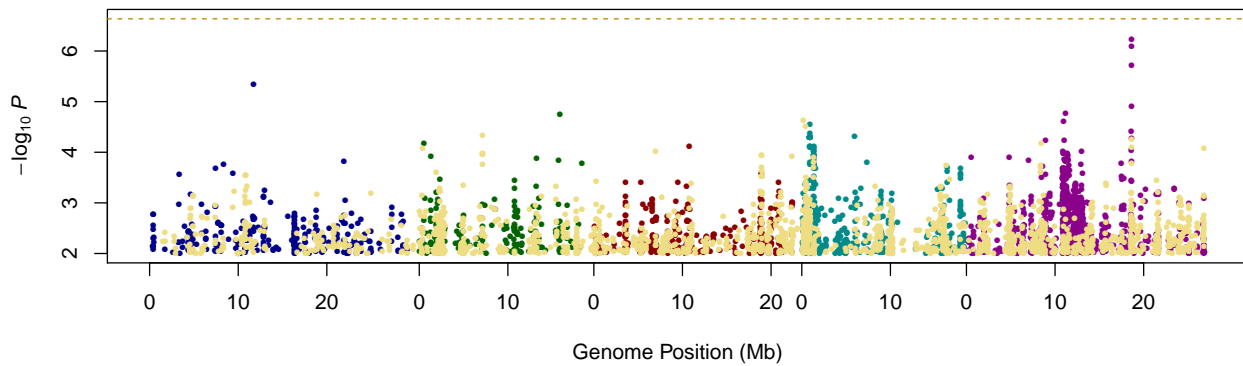

**Comparison of Brown-Forsythe & Wilcoxon  $p$ -values (MAF: minor allele frequency)**

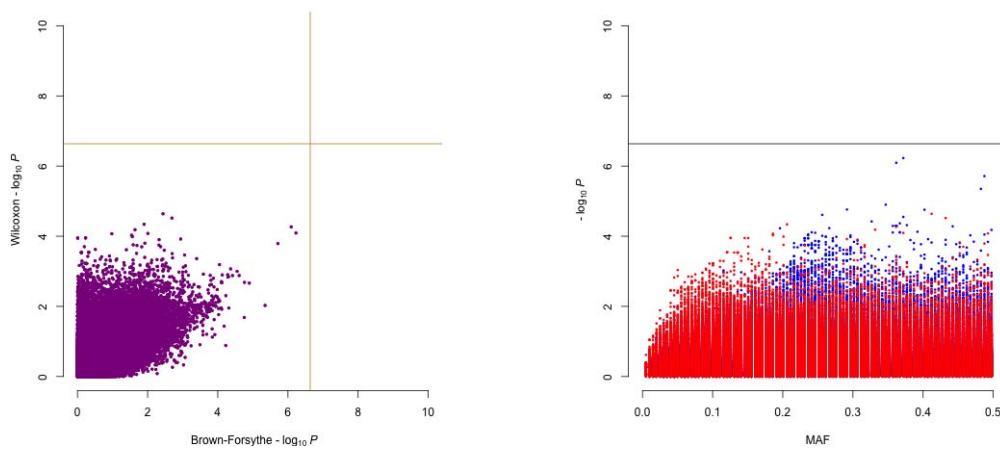

**Supplementary Figure B42 - Summary of vGWA results for 62: LFS GH**

**Histogram of the phenotype & QQ plots of the Brown-Forsythe  $p$ -values  
(blue: nominal  $p$ -values, green: genomic controlled)**

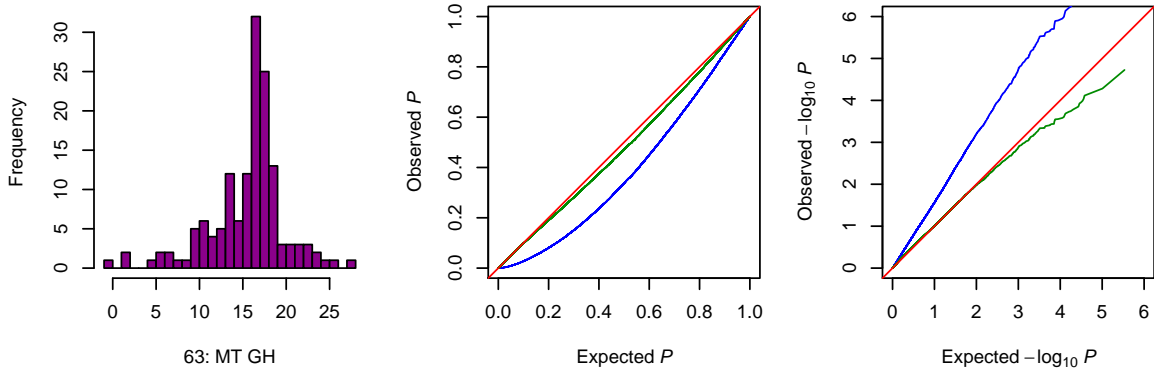

**Brown-Forsythe (colored, behind) & Wilcoxon (yellow, in front) results, genomic controlled**

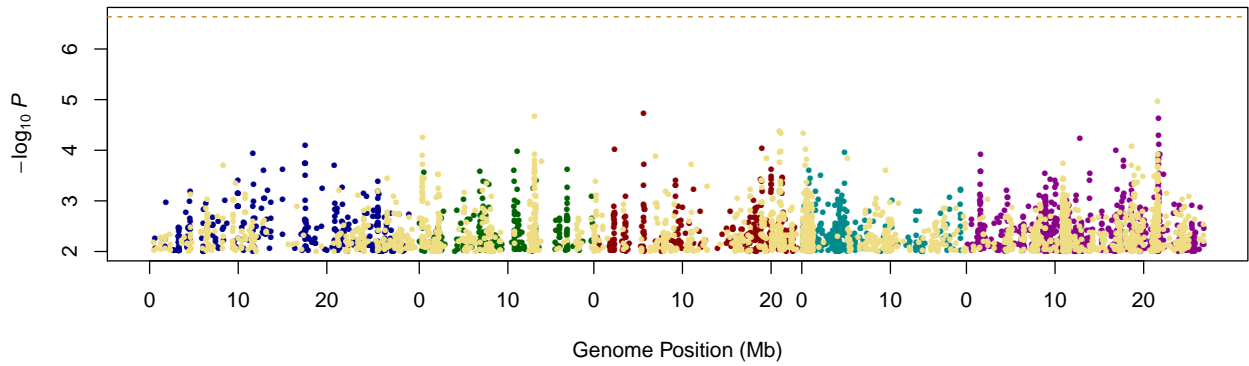

**Comparison of Brown-Forsythe & Wilcoxon  $p$ -values (MAF: minor allele frequency)**

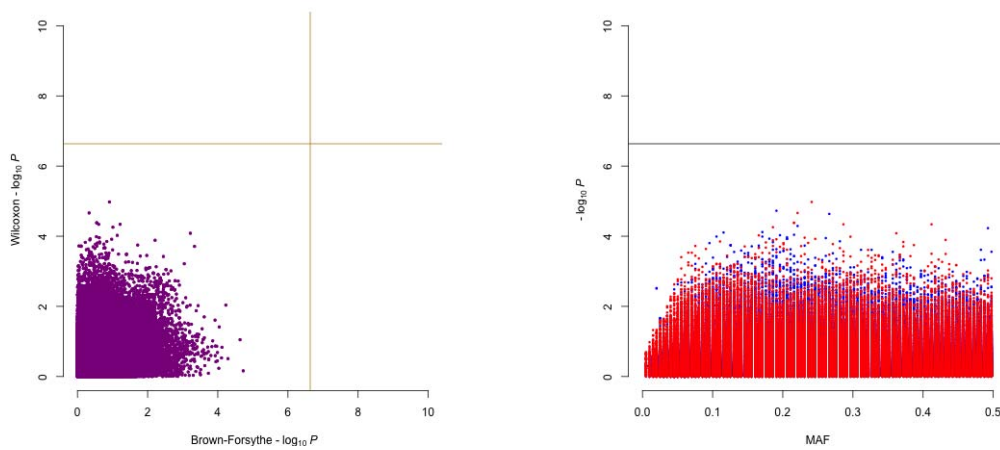

**Supplementary Figure B43 - Summary of vGWA results for 63: MT GH**

**Histogram of the phenotype & QQ plots of the Brown-Forsythe  $p$ -values  
(blue: nominal  $p$ -values, green: genomic controlled)**

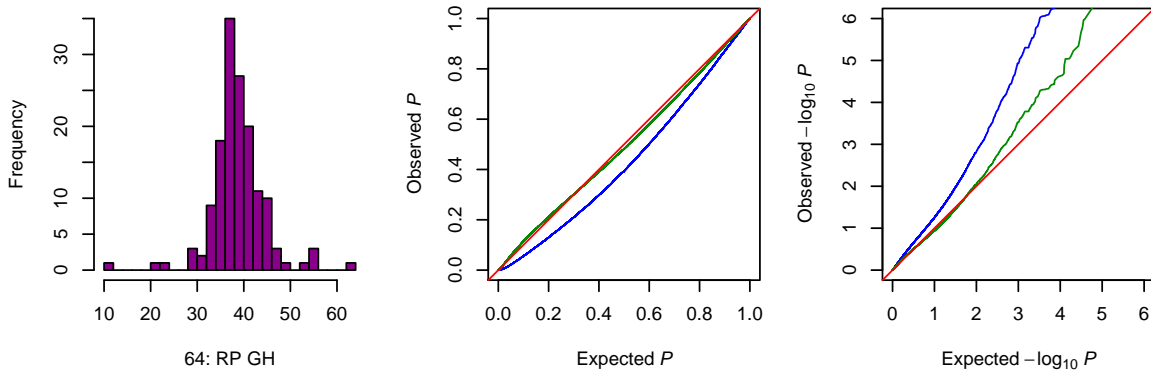

**Brown-Forsythe (colored, behind) & Wilcoxon (yellow, in front) results, genomic controlled**

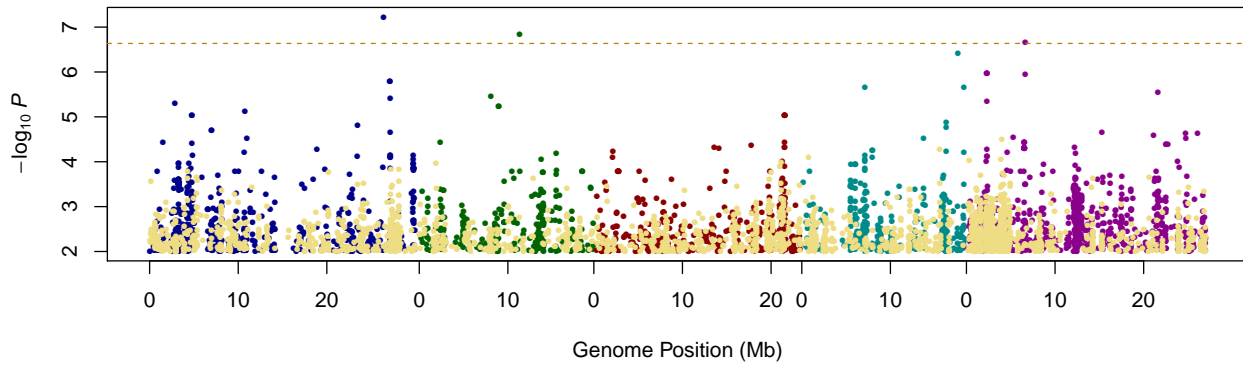

**Comparison of Brown-Forsythe & Wilcoxon  $p$ -values (MAF: minor allele frequency)**

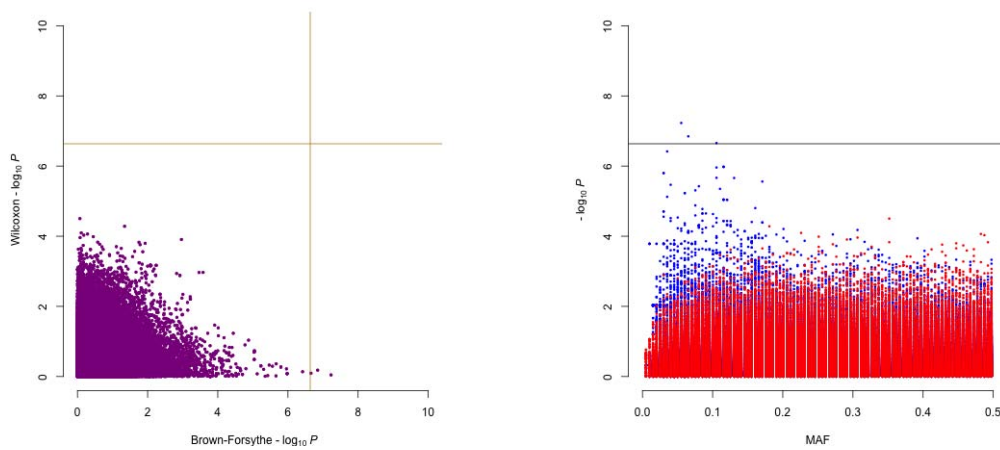

**Supplementary Figure B44 - Summary of vGWA results for 64: RP GH**

**Histogram of the phenotype & QQ plots of the Brown-Forsythe  $p$ -values  
(blue: nominal  $p$ -values, green: genomic controlled)**

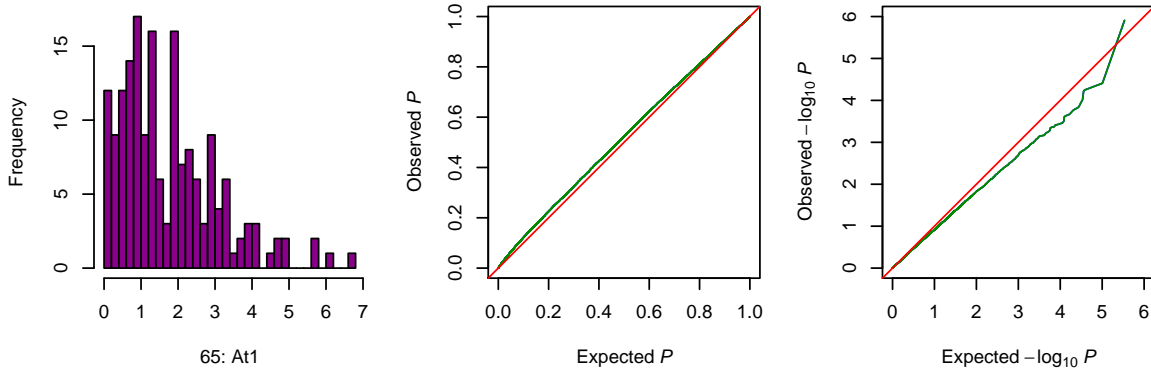

**Brown-Forsythe (colored, behind) & Wilcoxon (yellow, in front) results, genomic controlled**

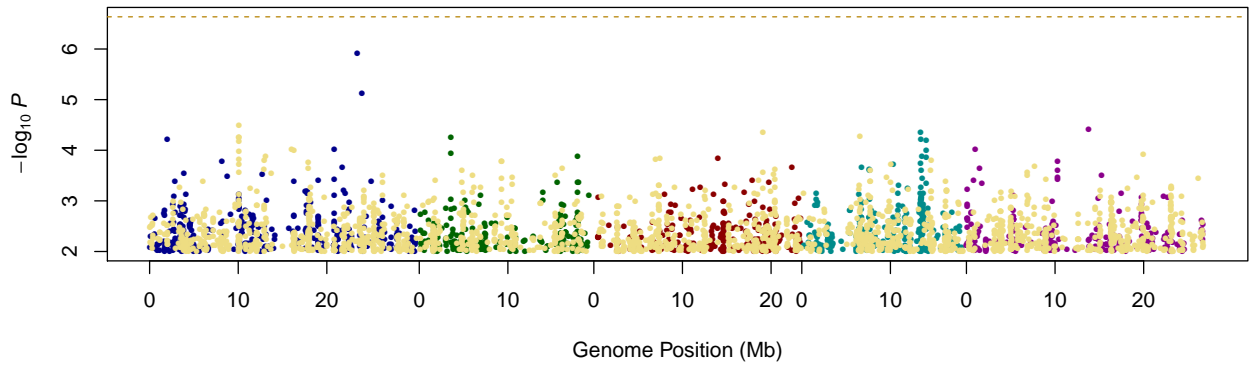

**Comparison of Brown-Forsythe & Wilcoxon  $p$ -values (MAF: minor allele frequency)**

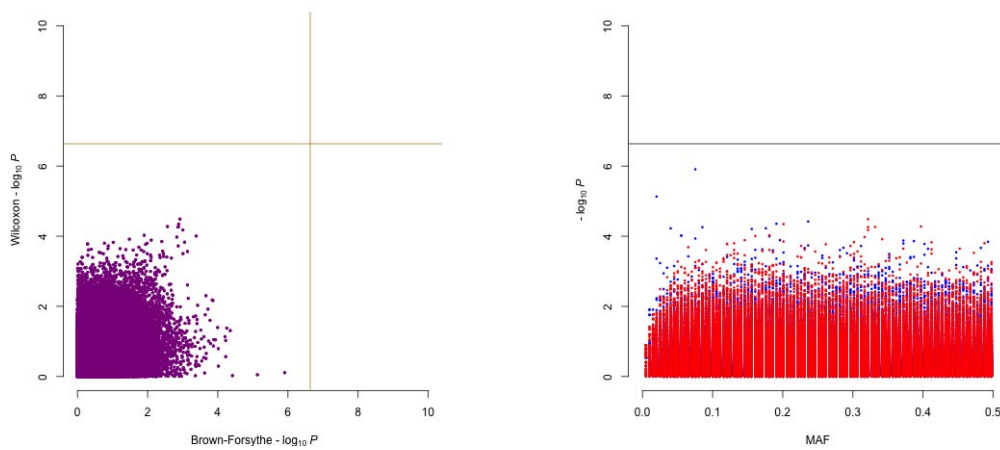

**Supplementary Figure B45 - Summary of vGWA results for 65: At1**

**Histogram of the phenotype & QQ plots of the Brown-Forsythe  $p$ -values  
(blue: nominal  $p$ -values, green: genomic controlled)**

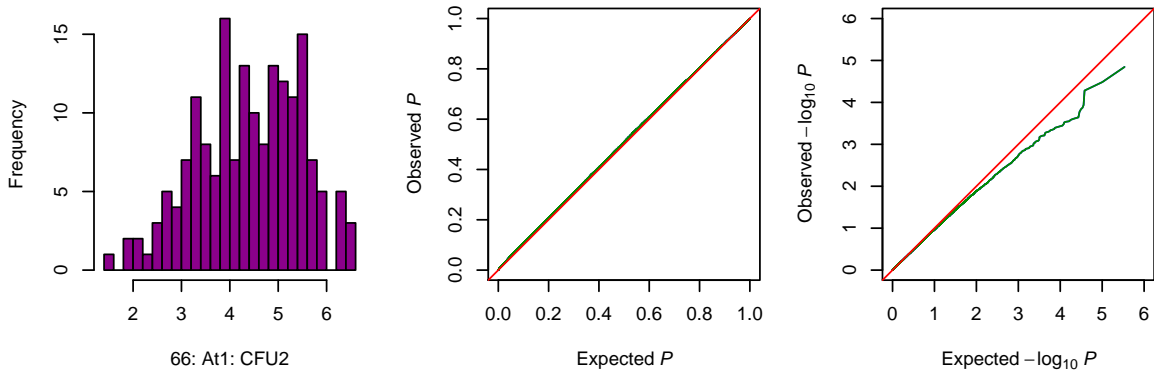

**Brown-Forsythe (colored, behind) & Wilcoxon (yellow, in front) results, genomic controlled**

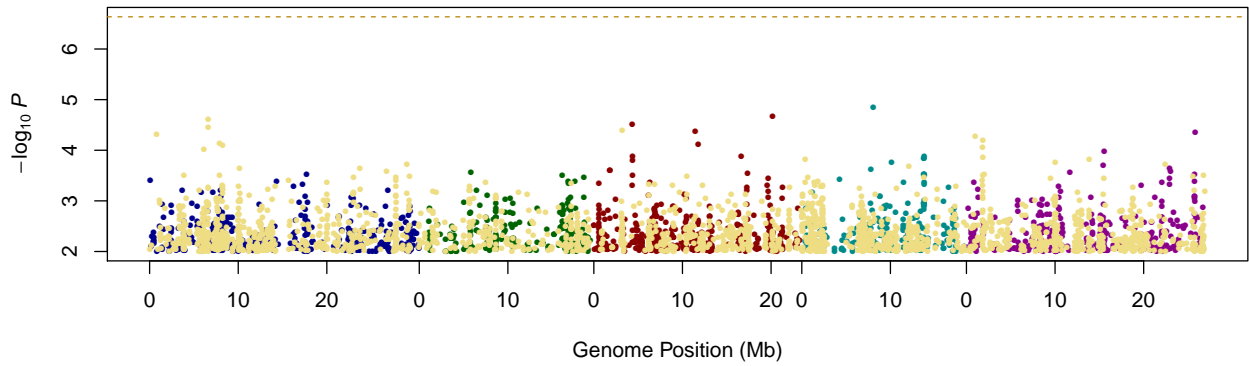

**Comparison of Brown-Forsythe & Wilcoxon  $p$ -values (MAF: minor allele frequency)**

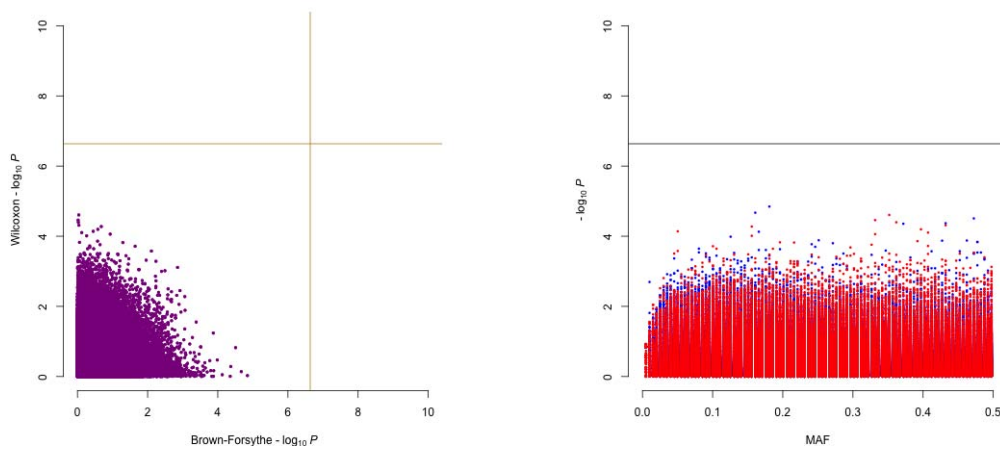

**Supplementary Figure B46 - Summary of vGWA results for 66: At1: CFU2**

**Histogram of the phenotype & QQ plots of the Brown-Forsythe  $p$ -values  
(blue: nominal  $p$ -values, green: genomic controlled)**

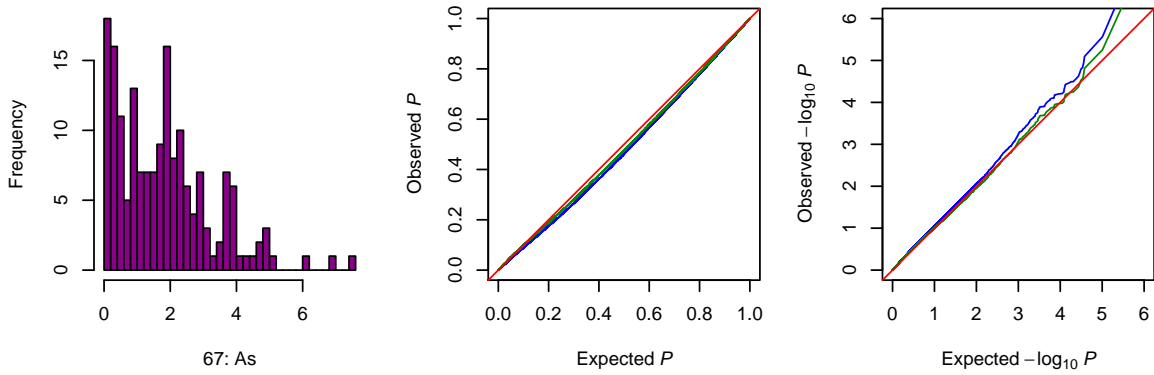

**Brown-Forsythe (colored, behind) & Wilcoxon (yellow, in front) results, genomic controlled**

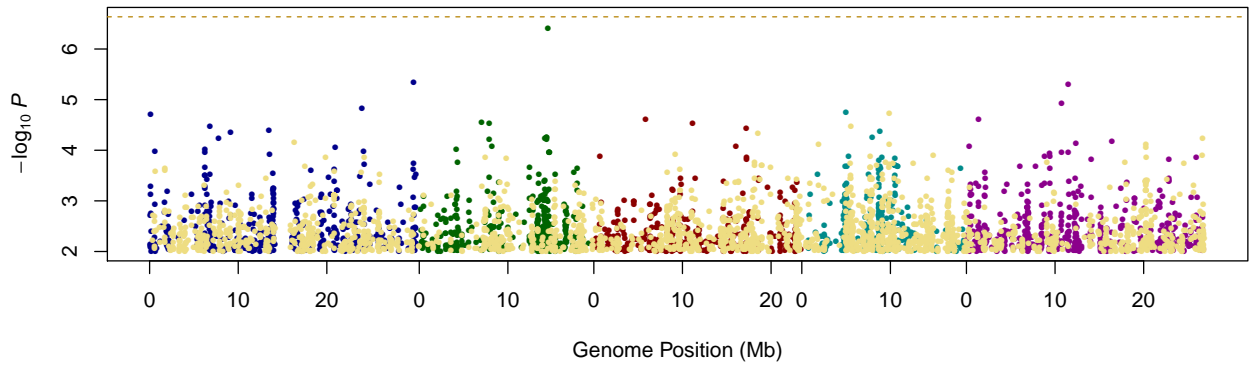

**Comparison of Brown-Forsythe & Wilcoxon  $p$ -values (MAF: minor allele frequency)**

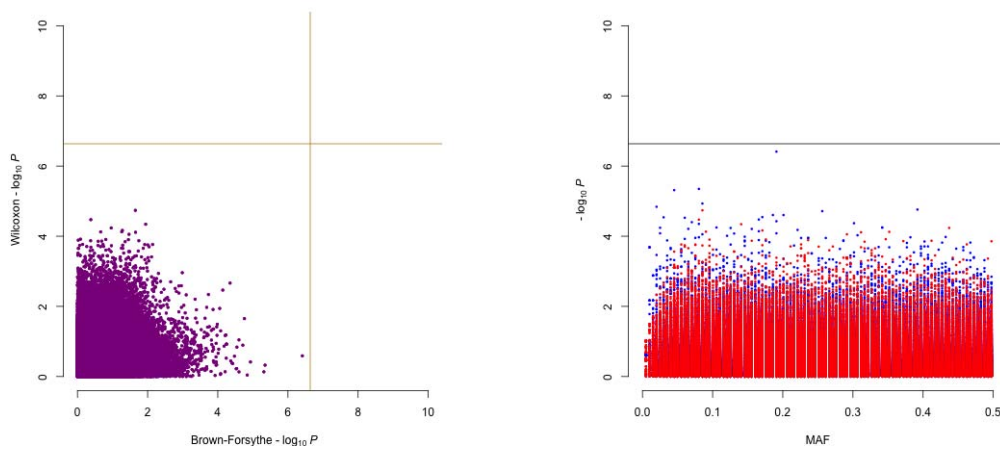

**Supplementary Figure B47 - Summary of vGWA results for 67: As**

**Histogram of the phenotype & QQ plots of the Brown-Forsythe  $p$ -values  
(blue: nominal  $p$ -values, green: genomic controlled)**

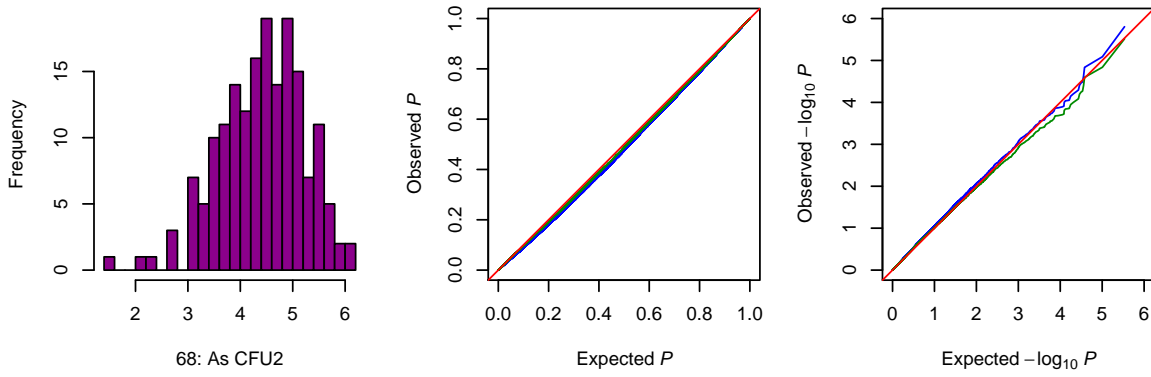

**Brown-Forsythe (colored, behind) & Wilcoxon (yellow, in front) results, genomic controlled**

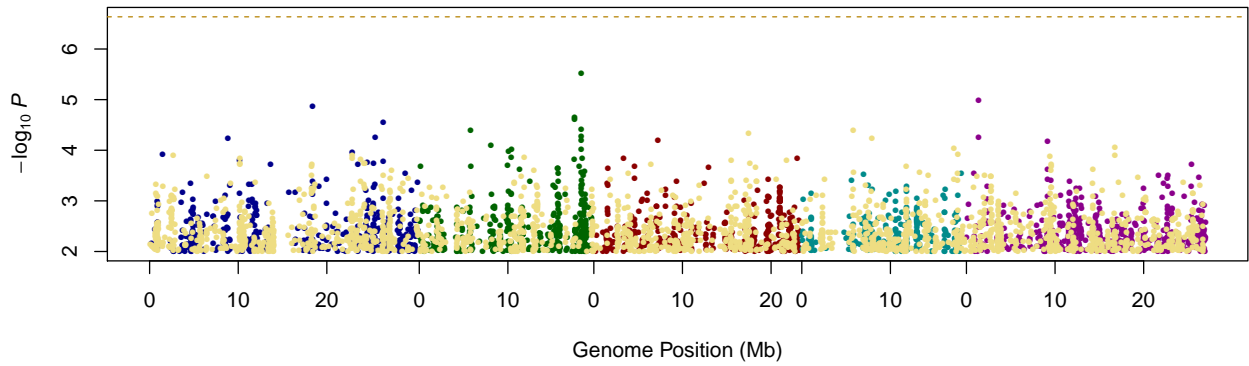

**Comparison of Brown-Forsythe & Wilcoxon  $p$ -values (MAF: minor allele frequency)**

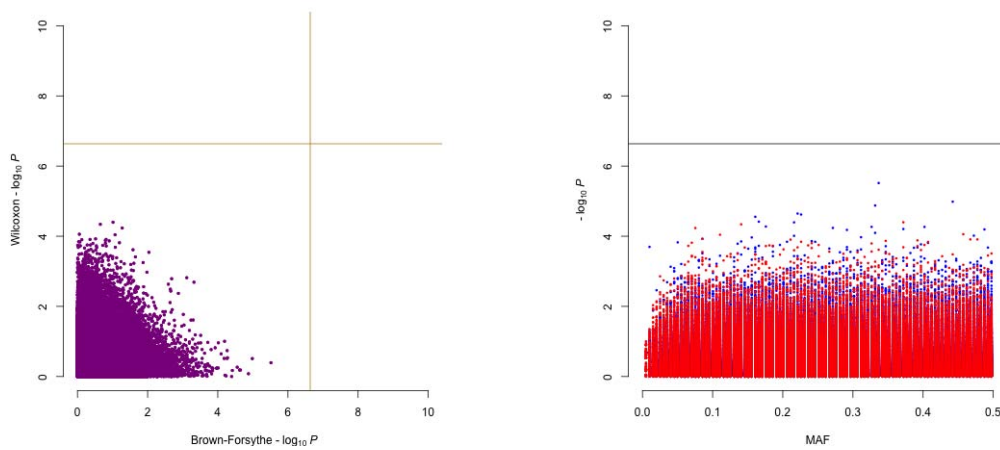

**Supplementary Figure B48 - Summary of vGWA results for 68: As CFU2**



**Histogram of the phenotype & QQ plots of the Brown-Forsythe  $p$ -values  
(blue: nominal  $p$ -values, green: genomic controlled)**

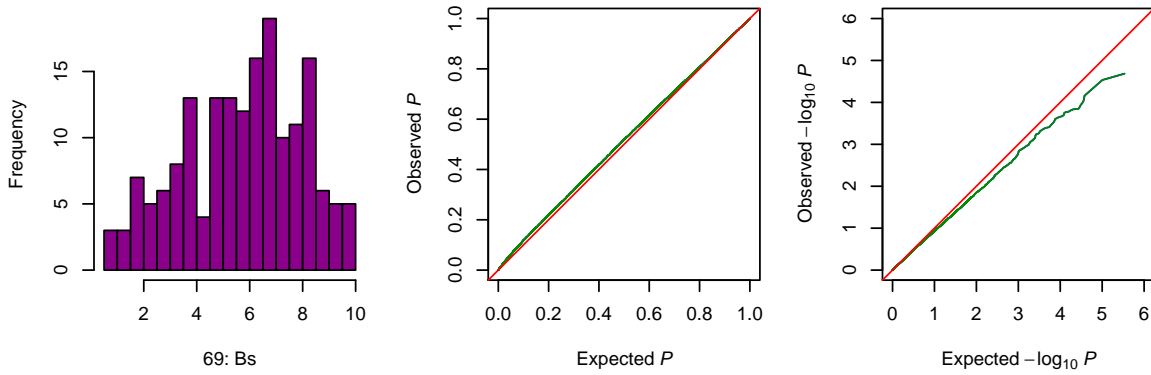

**Brown-Forsythe (colored, behind) & Wilcoxon (yellow, in front) results, genomic controlled**

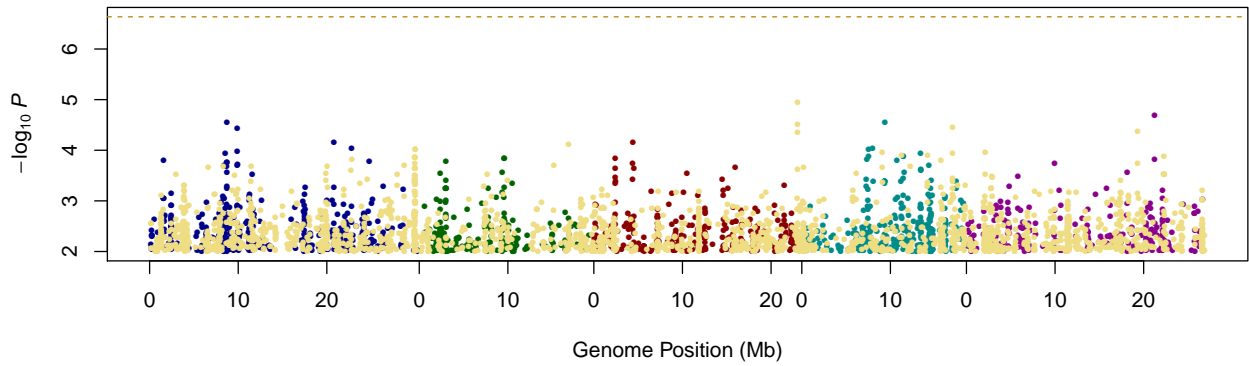

**Comparison of Brown-Forsythe & Wilcoxon  $p$ -values (MAF: minor allele frequency)**

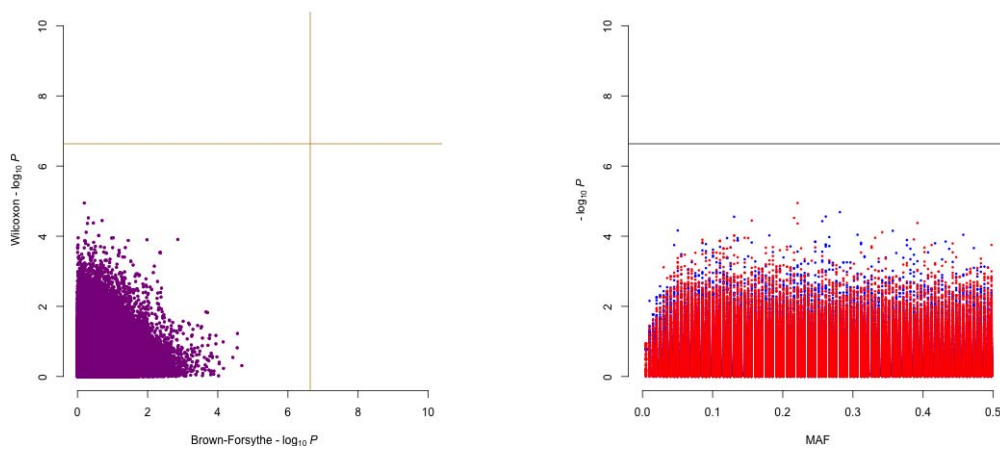

**Supplementary Figure B49 - Summary of vGWA results for 69: Bs**

**Histogram of the phenotype & QQ plots of the Brown-Forsythe  $p$ -values  
(blue: nominal  $p$ -values, green: genomic controlled)**

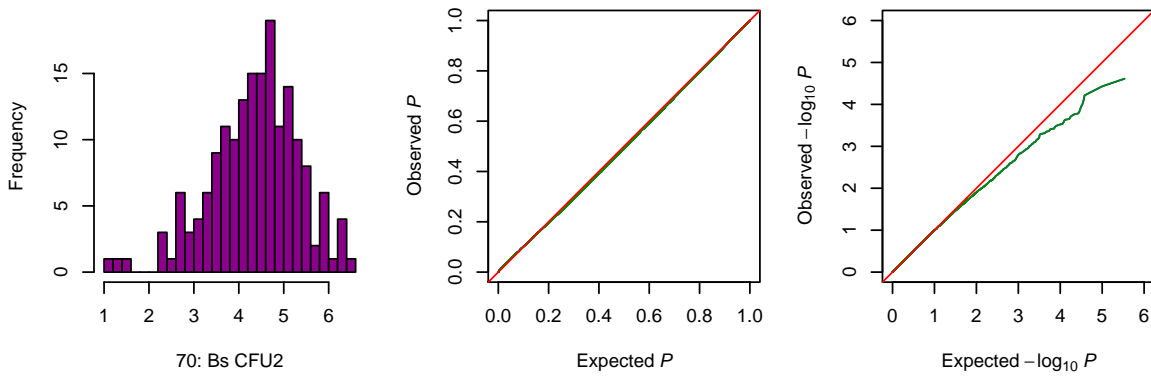

**Brown-Forsythe (colored, behind) & Wilcoxon (yellow, in front) results, genomic controlled**

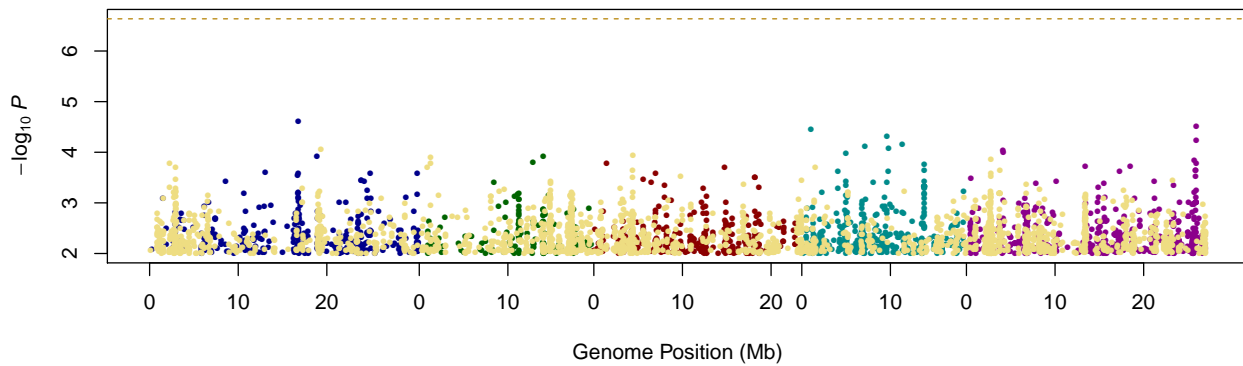

**Comparison of Brown-Forsythe & Wilcoxon  $p$ -values (MAF: minor allele frequency)**

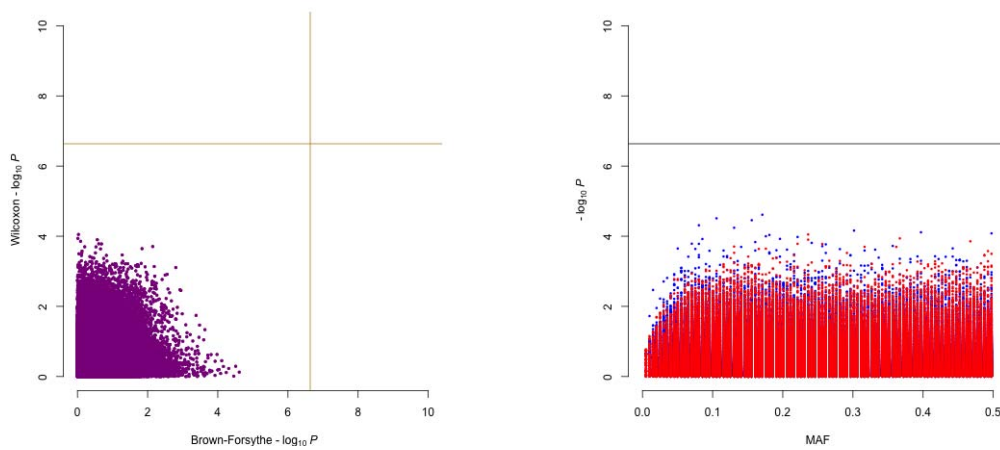

**Supplementary Figure B50 - Summary of vGWA results for 70: Bs CFU2**

**Histogram of the phenotype & QQ plots of the Brown-Forsythe  $p$ -values  
(blue: nominal  $p$ -values, green: genomic controlled)**

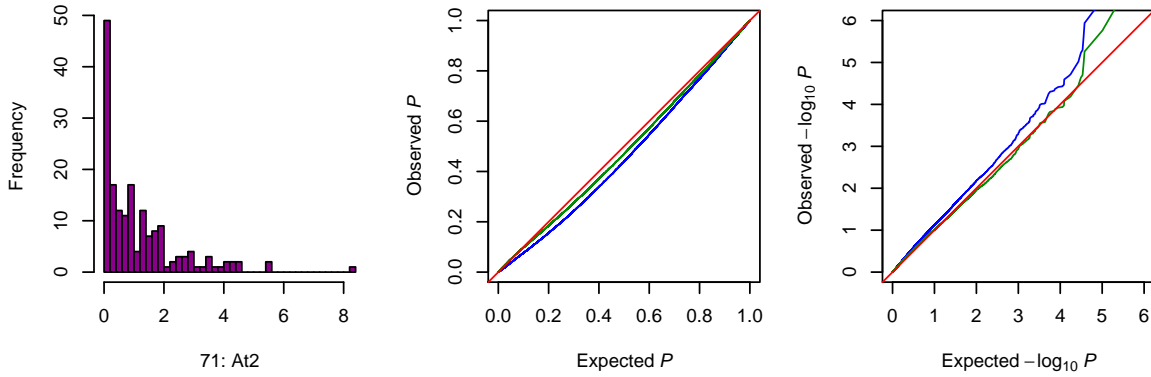

**Brown-Forsythe (colored, behind) & Wilcoxon (yellow, in front) results, genomic controlled**

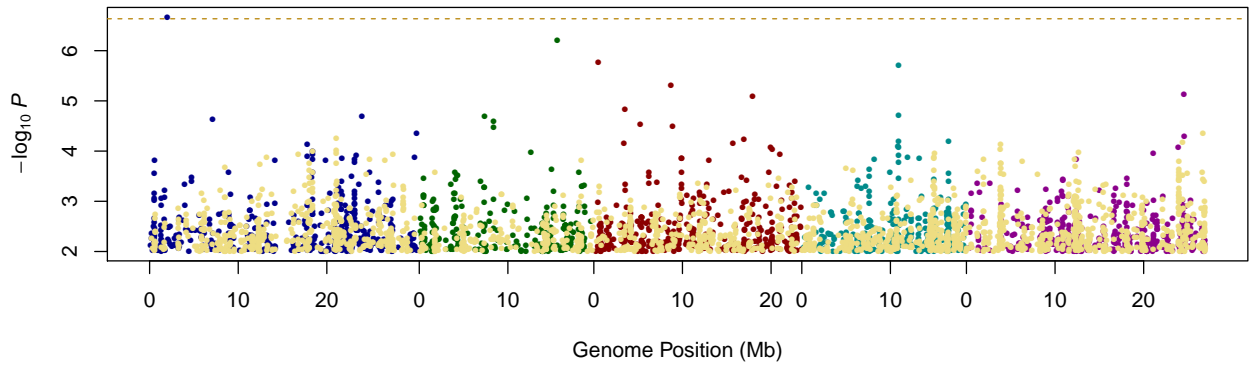

**Comparison of Brown-Forsythe & Wilcoxon  $p$ -values (MAF: minor allele frequency)**

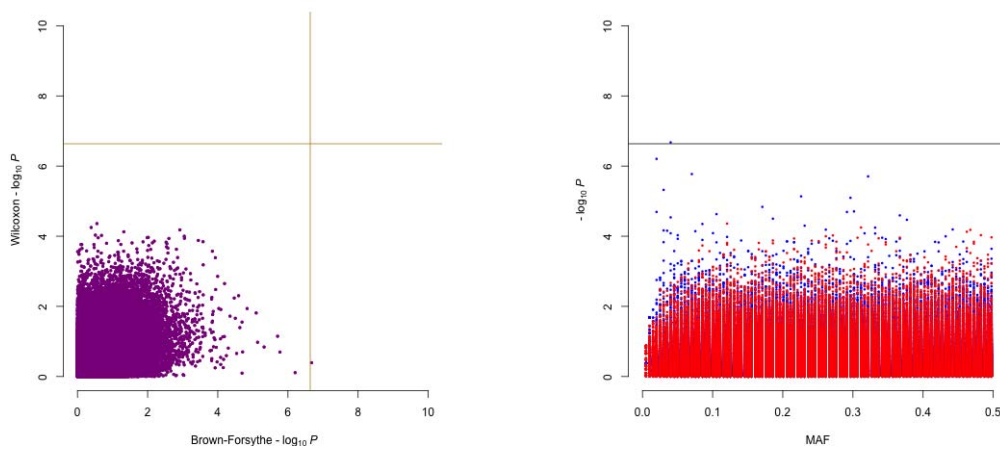

**Supplementary Figure B51 - Summary of vGWA results for 71: At2**

**Histogram of the phenotype & QQ plots of the Brown-Forsythe  $p$ -values  
(blue: nominal  $p$ -values, green: genomic controlled)**

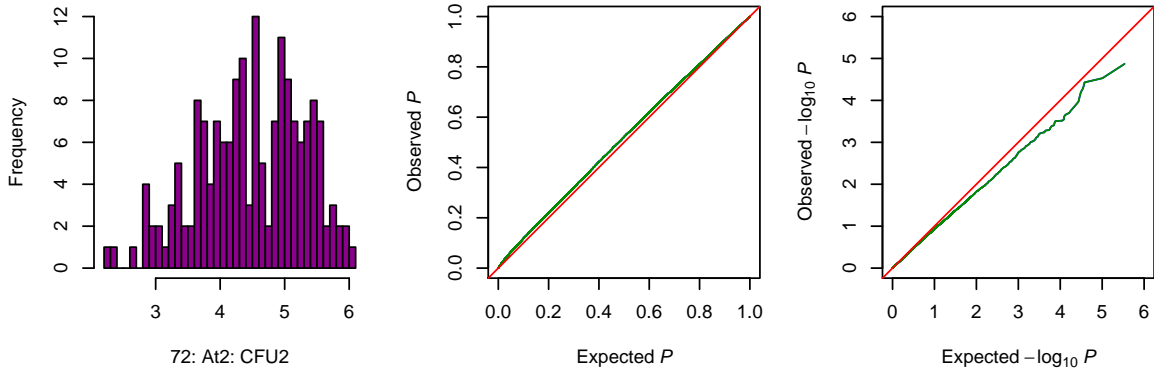

**Brown-Forsythe (colored, behind) & Wilcoxon (yellow, in front) results, genomic controlled**

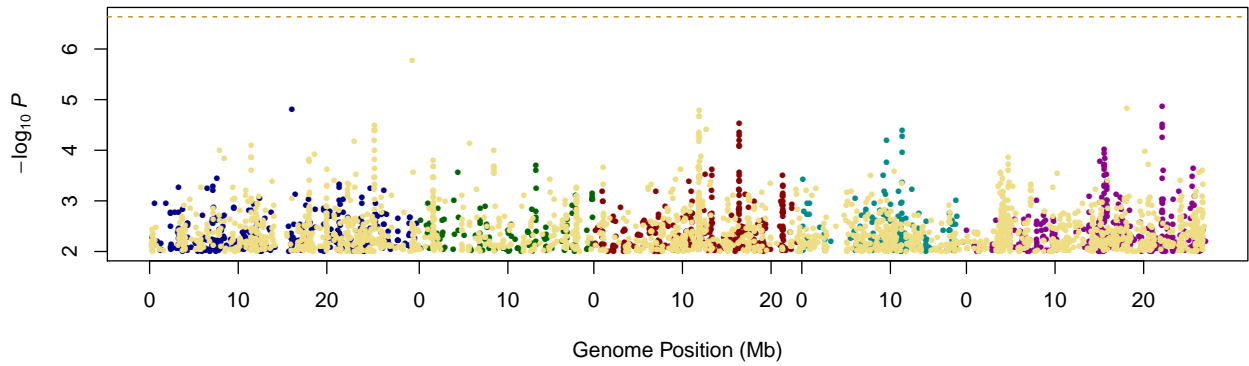

**Comparison of Brown-Forsythe & Wilcoxon  $p$ -values (MAF: minor allele frequency)**

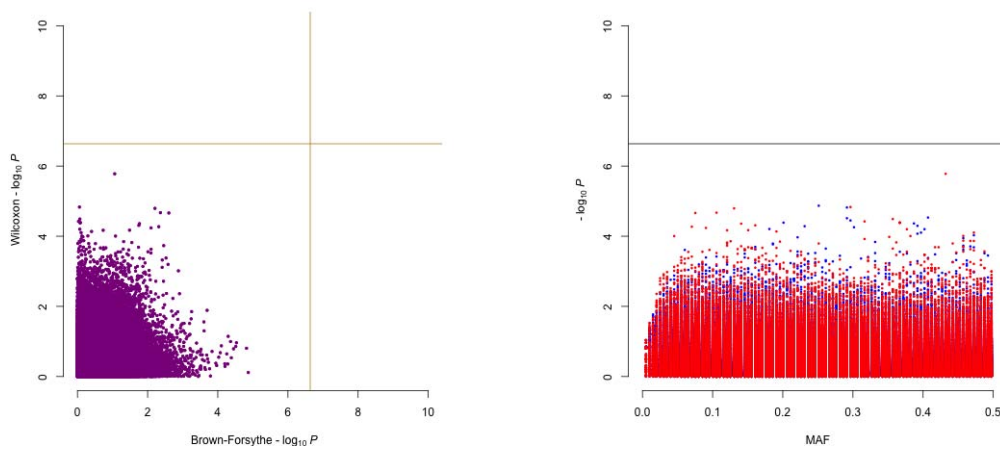

**Supplementary Figure B52 - Summary of vGWA results for 72: At2: CFU2**

**Histogram of the phenotype & QQ plots of the Brown-Forsythe  $p$ -values  
(blue: nominal  $p$ -values, green: genomic controlled)**

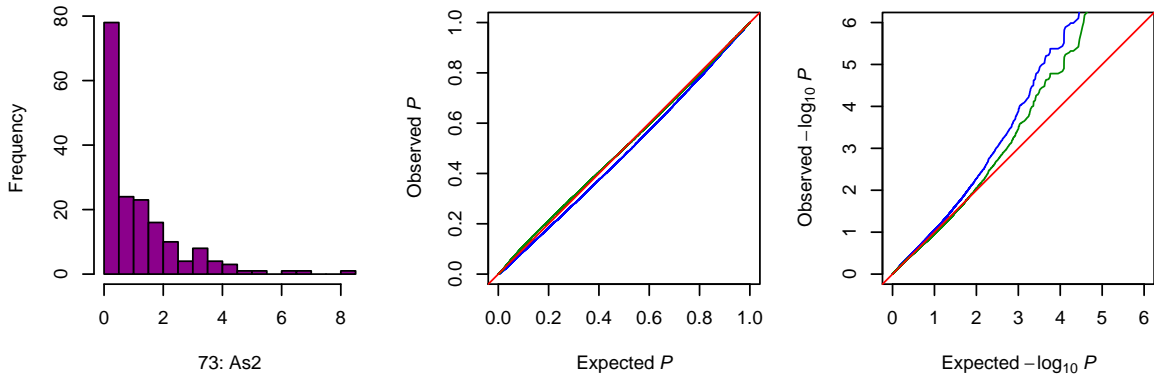

**Brown-Forsythe (colored, behind) & Wilcoxon (yellow, in front) results, genomic controlled**

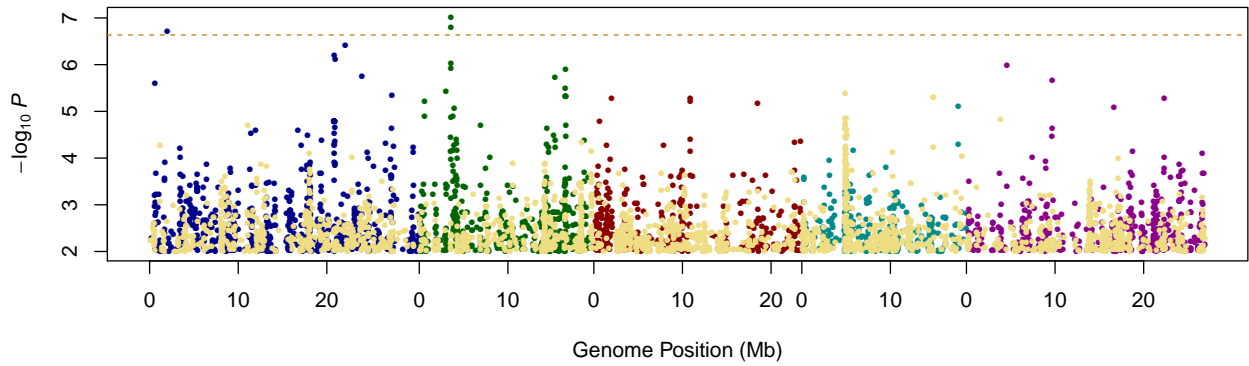

**Comparison of Brown-Forsythe & Wilcoxon  $p$ -values (MAF: minor allele frequency)**

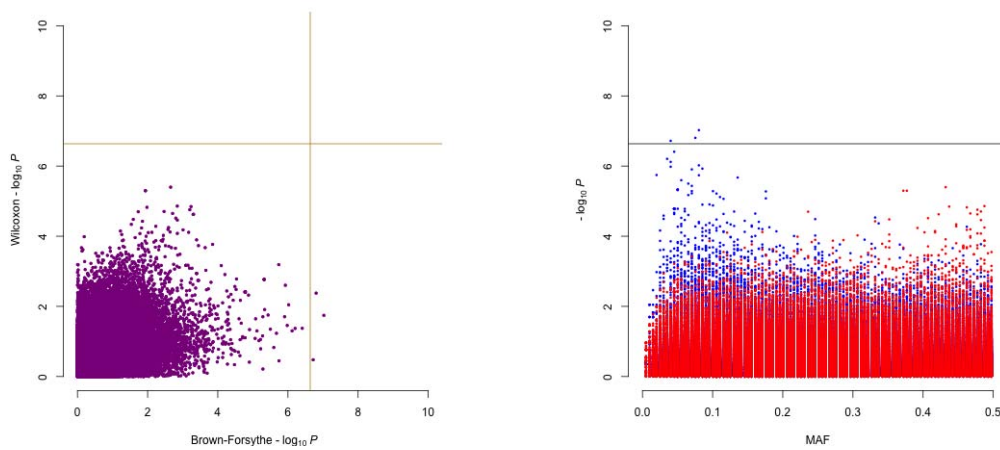

**Supplementary Figure B53 - Summary of vGWA results for 73: As2**

**Histogram of the phenotype & QQ plots of the Brown-Forsythe  $p$ -values  
(blue: nominal  $p$ -values, green: genomic controlled)**

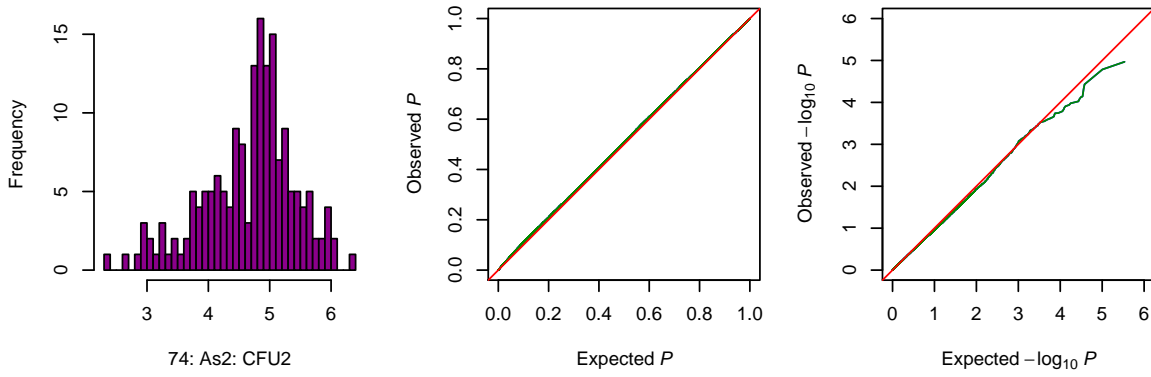

**Brown-Forsythe (colored, behind) & Wilcoxon (yellow, in front) results, genomic controlled**

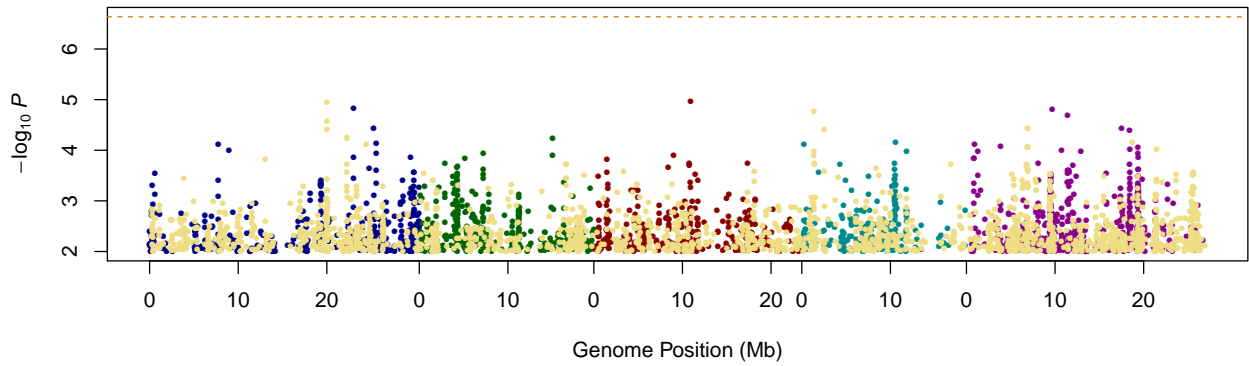

**Comparison of Brown-Forsythe & Wilcoxon  $p$ -values (MAF: minor allele frequency)**

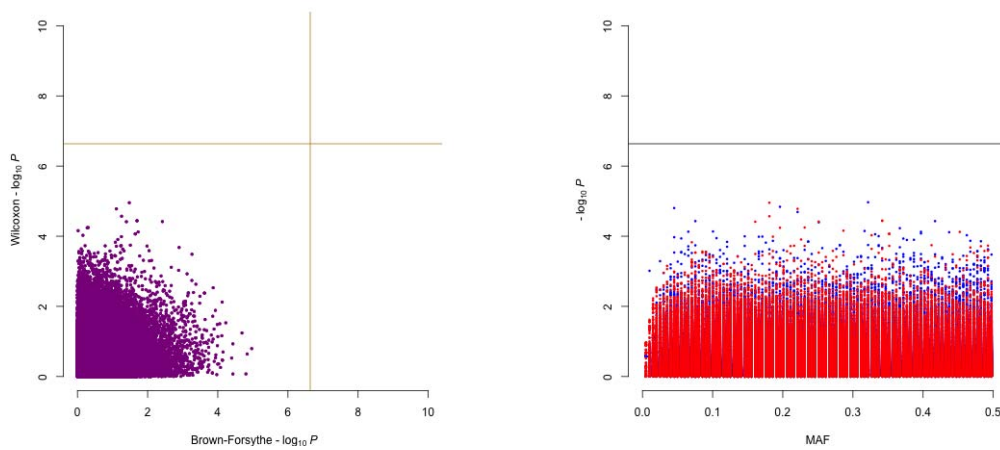

**Supplementary Figure B54 - Summary of vGWA results for 74: As2: CFU2**

**Histogram of the phenotype & QQ plots of the Brown-Forsythe  $p$ -values  
(blue: nominal  $p$ -values, green: genomic controlled)**

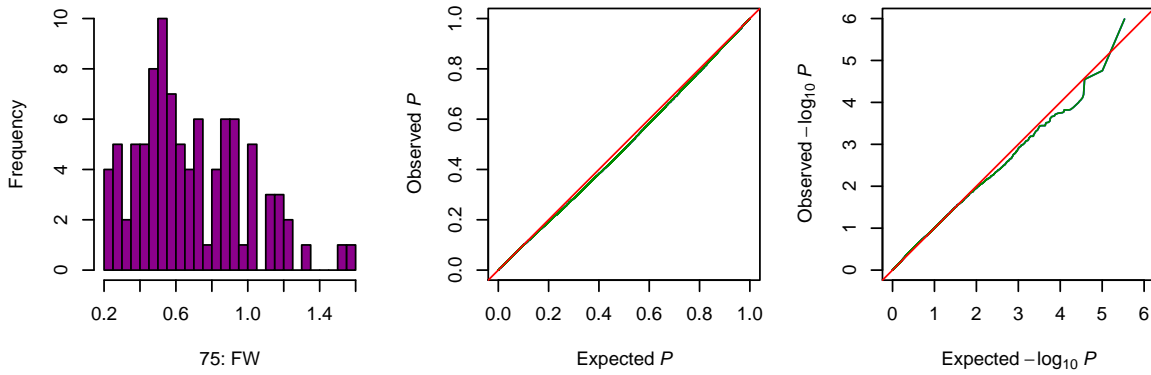

**Brown-Forsythe (colored, behind) & Wilcoxon (yellow, in front) results, genomic controlled**

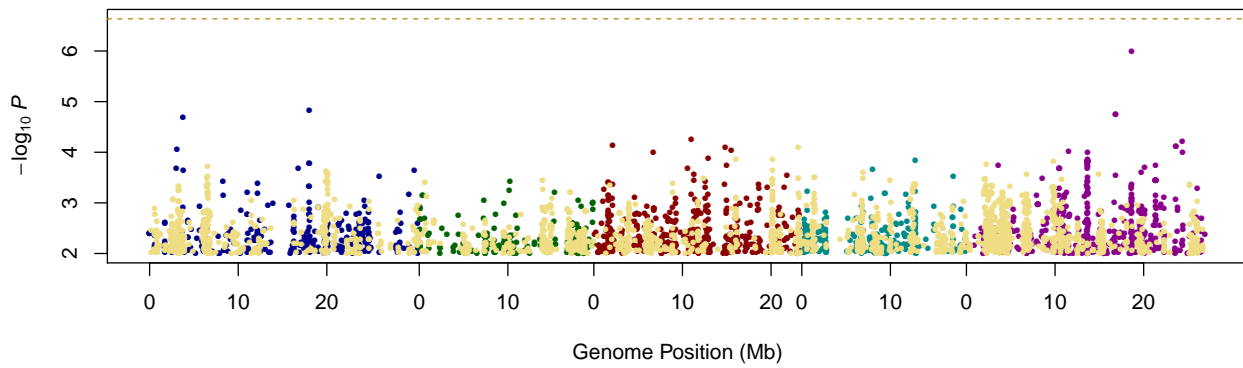

**Comparison of Brown-Forsythe & Wilcoxon  $p$ -values (MAF: minor allele frequency)**

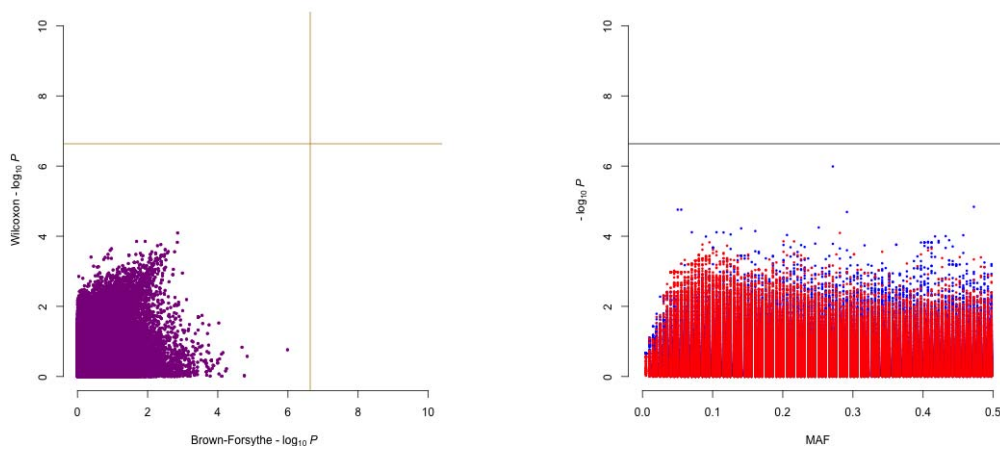

**Supplementary Figure B55 - Summary of vGWA results for 75: FW**

**Histogram of the phenotype & QQ plots of the Brown-Forsythe  $p$ -values  
(blue: nominal  $p$ -values, green: genomic controlled)**

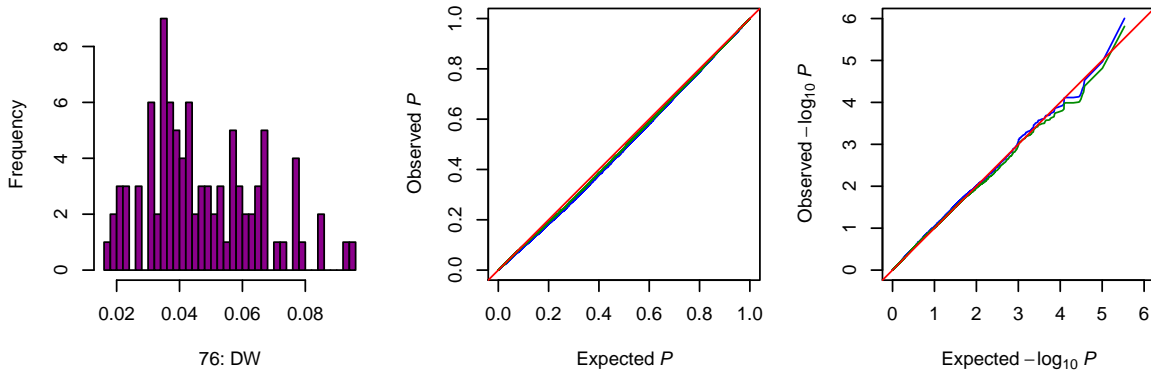

**Brown-Forsythe (colored, behind) & Wilcoxon (yellow, in front) results, genomic controlled**

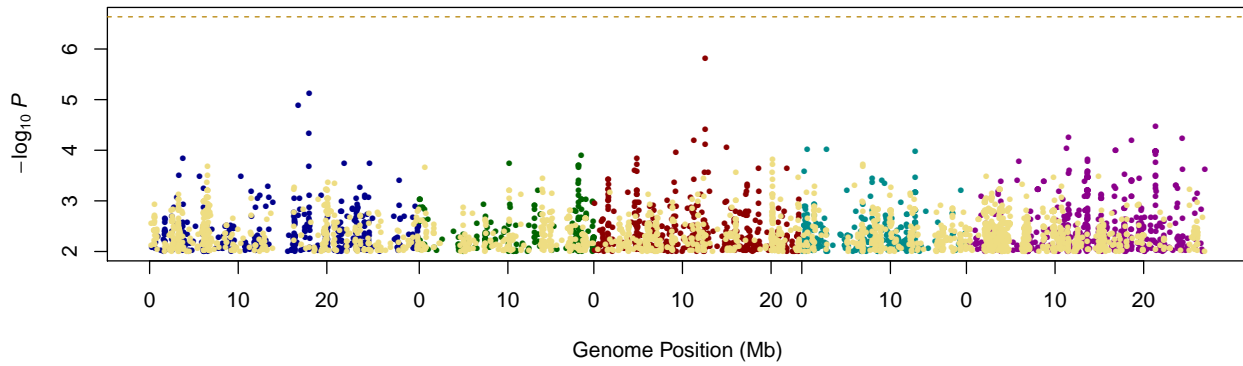

**Comparison of Brown-Forsythe & Wilcoxon  $p$ -values (MAF: minor allele frequency)**

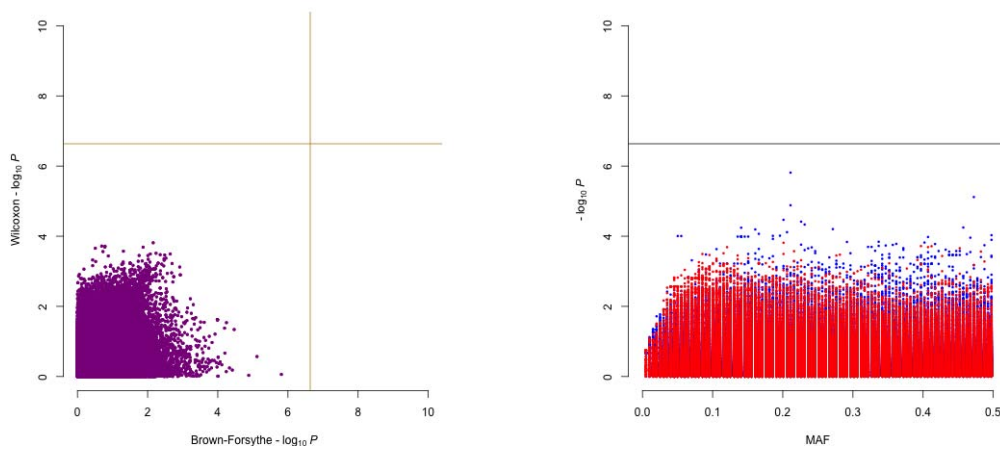

**Supplementary Figure B56 - Summary of vGWA results for 76: DW**



**Histogram of the phenotype & QQ plots of the Brown-Forsythe  $p$ -values  
(blue: nominal  $p$ -values, green: genomic controlled)**

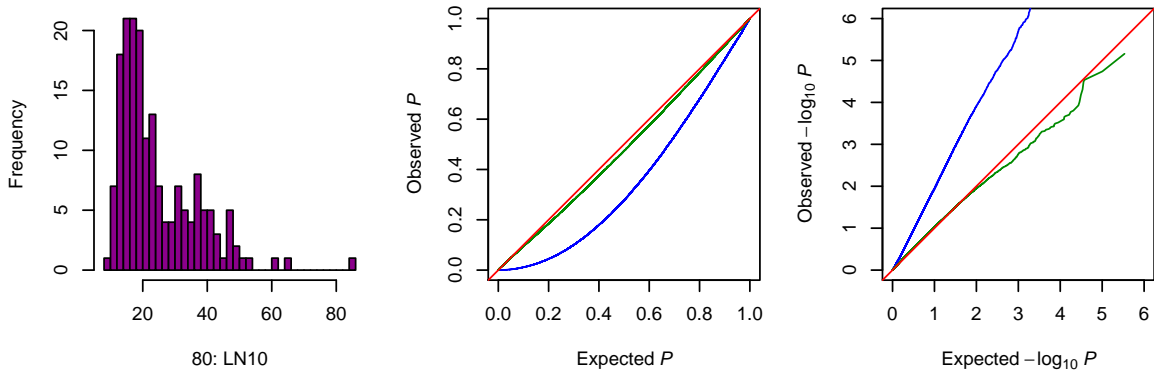

**Brown-Forsythe (colored, behind) & Wilcoxon (yellow, in front) results, genomic controlled**

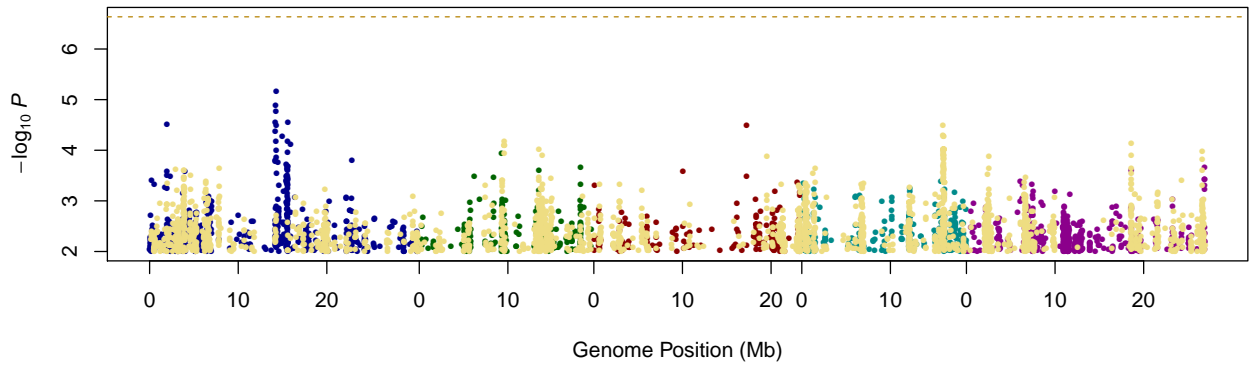

**Comparison of Brown-Forsythe & Wilcoxon  $p$ -values (MAF: minor allele frequency)**

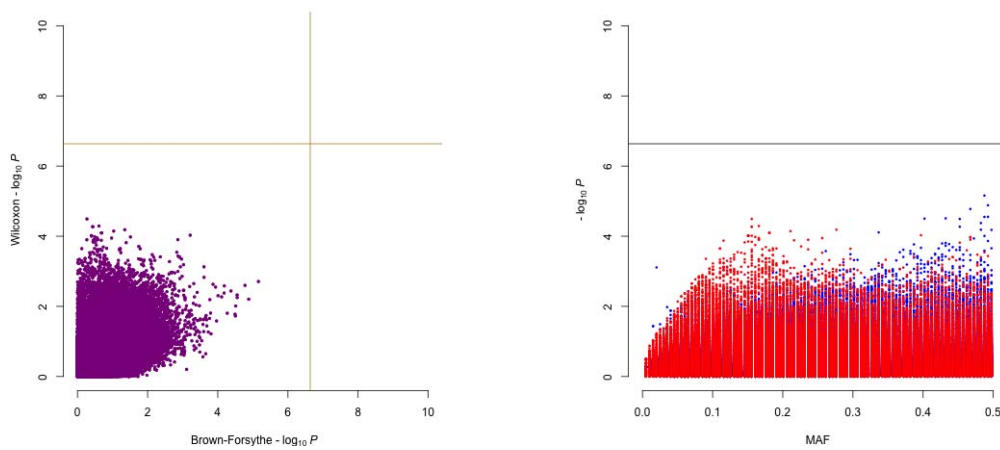

**Supplementary Figure B57 - Summary of vGWA results for 80: LN10**

**Histogram of the phenotype & QQ plots of the Brown-Forsythe  $p$ -values  
(blue: nominal  $p$ -values, green: genomic controlled)**

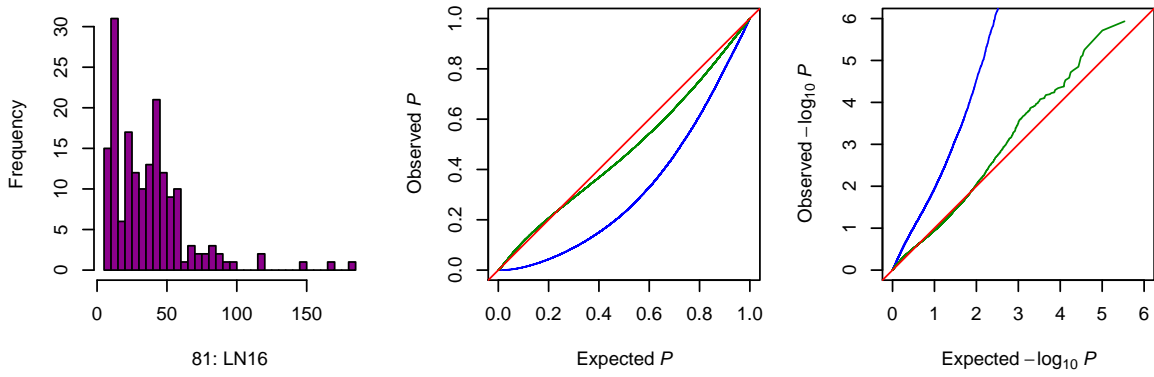

**Brown-Forsythe (colored, behind) & Wilcoxon (yellow, in front) results, genomic controlled**

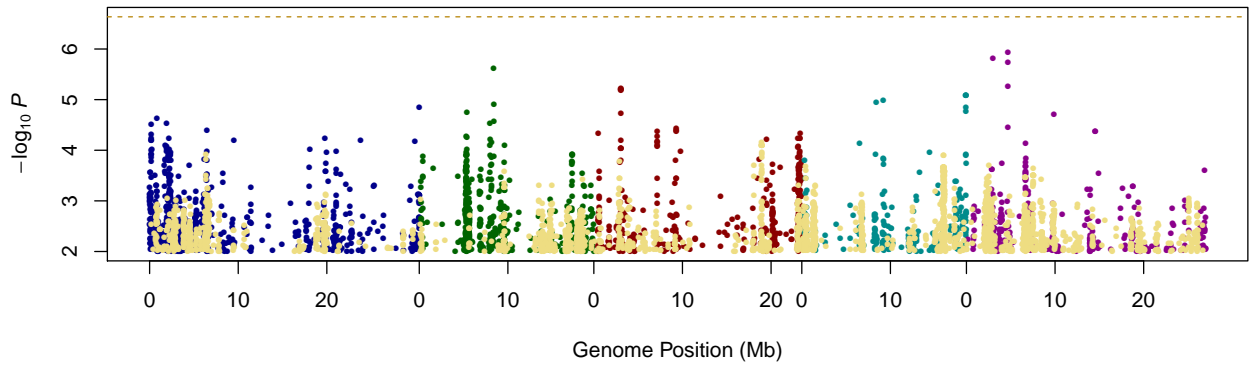

**Comparison of Brown-Forsythe & Wilcoxon  $p$ -values (MAF: minor allele frequency)**

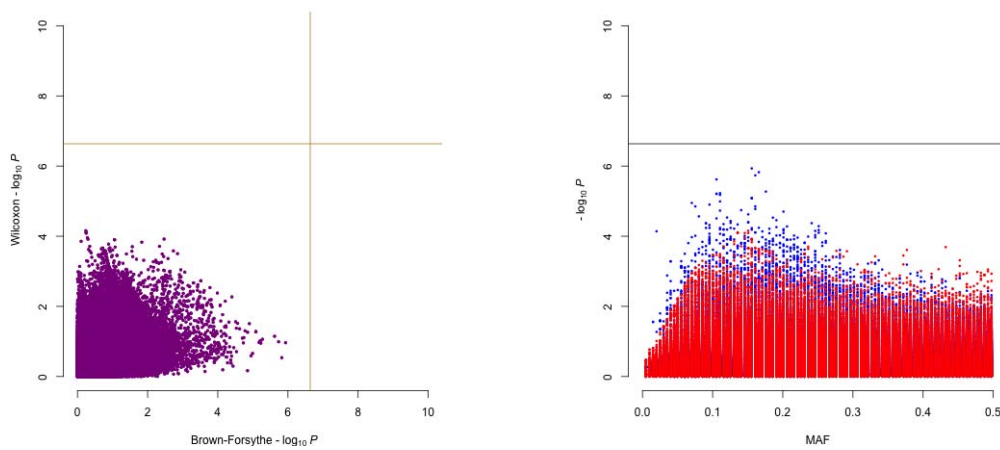

**Supplementary Figure B58 - Summary of vGWA results for 81: LN16**

**Histogram of the phenotype & QQ plots of the Brown-Forsythe  $p$ -values  
(blue: nominal  $p$ -values, green: genomic controlled)**

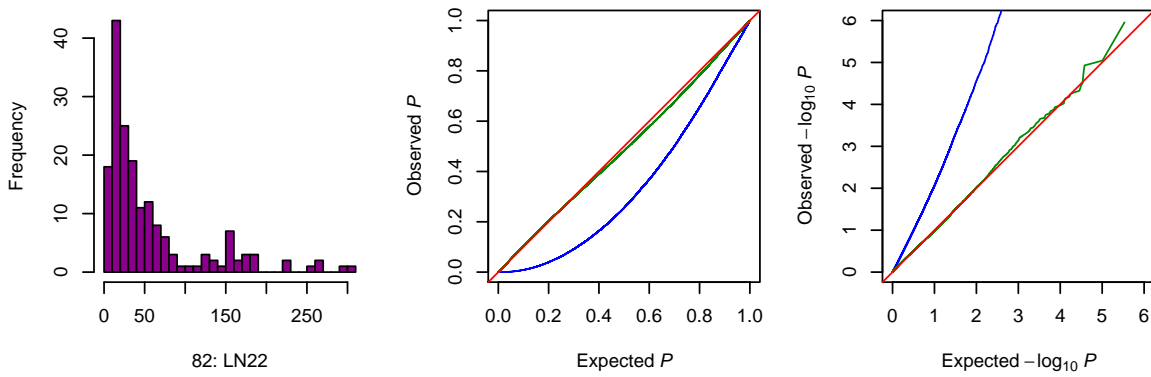

**Brown-Forsythe (colored, behind) & Wilcoxon (yellow, in front) results, genomic controlled**

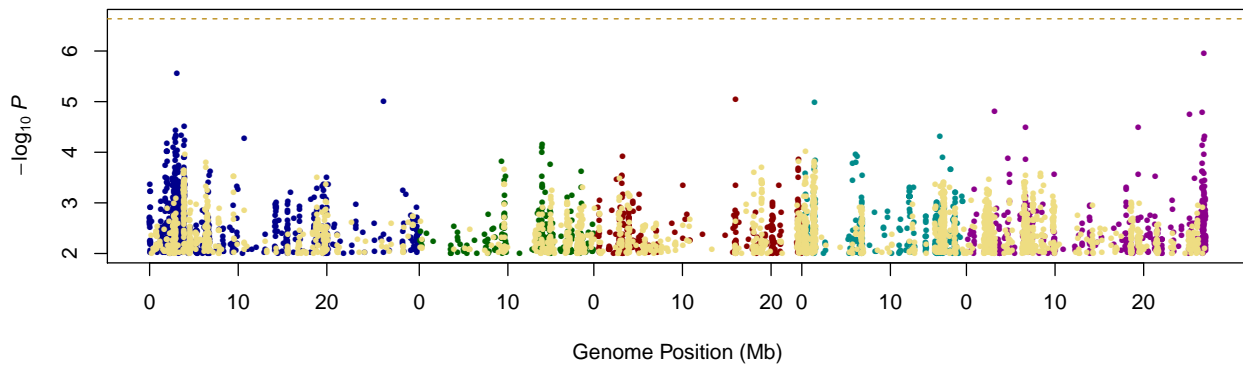

**Comparison of Brown-Forsythe & Wilcoxon  $p$ -values (MAF: minor allele frequency)**

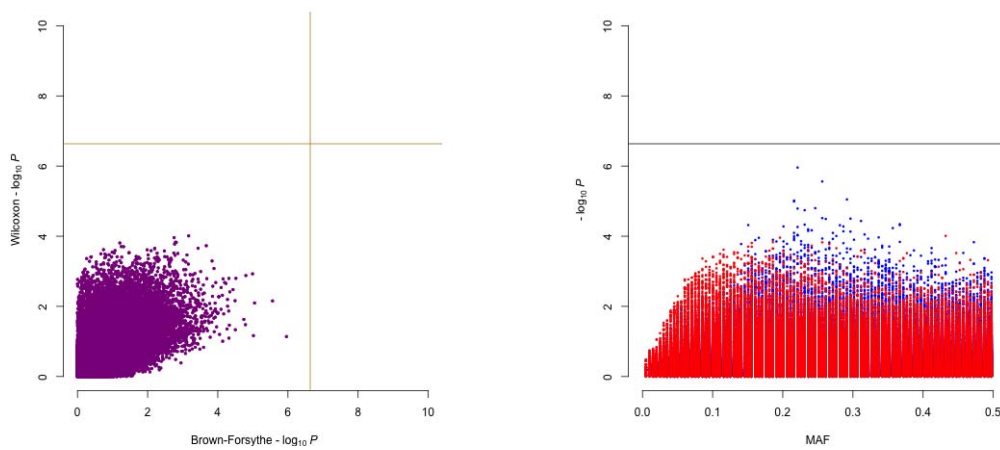

**Supplementary Figure B59 - Summary of vGWA results for 82: LN22**

**Histogram of the phenotype & QQ plots of the Brown-Forsythe  $p$ -values  
(blue: nominal  $p$ -values, green: genomic controlled)**

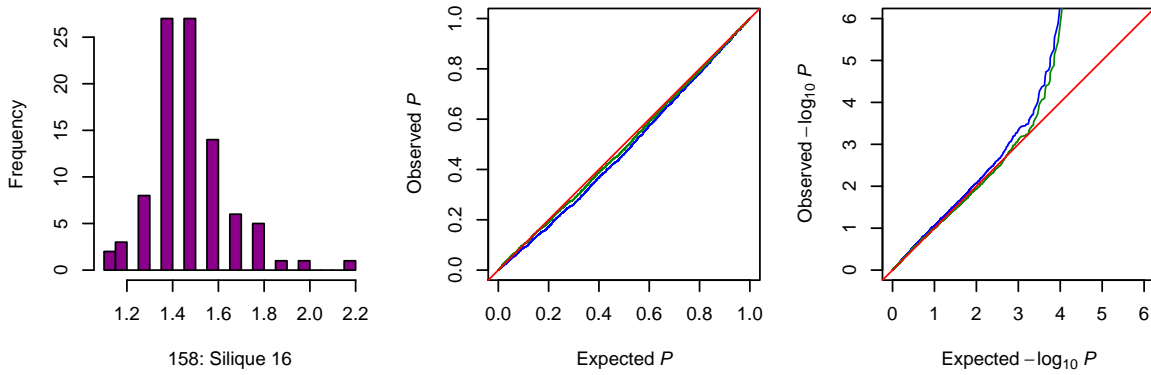

**Brown-Forsythe (colored, behind) & Wilcoxon (yellow, in front) results, genomic controlled**

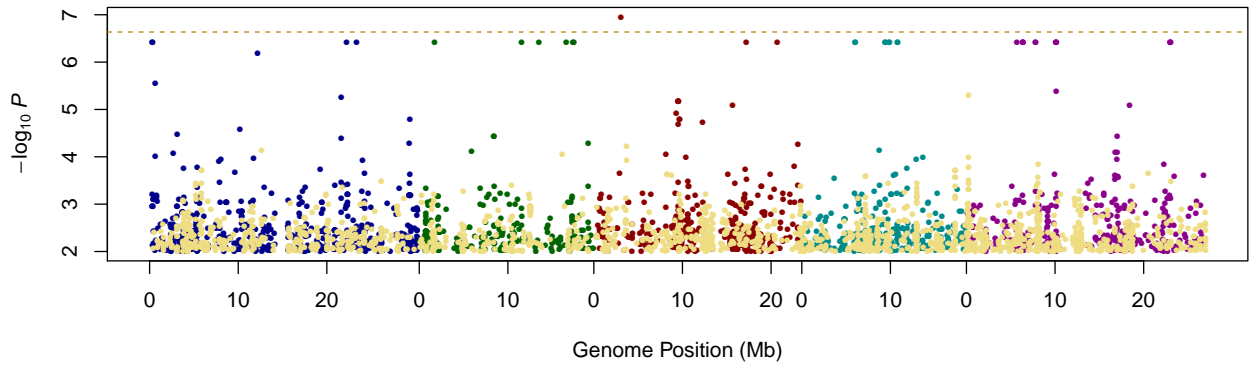

**Comparison of Brown-Forsythe & Wilcoxon  $p$ -values (MAF: minor allele frequency)**

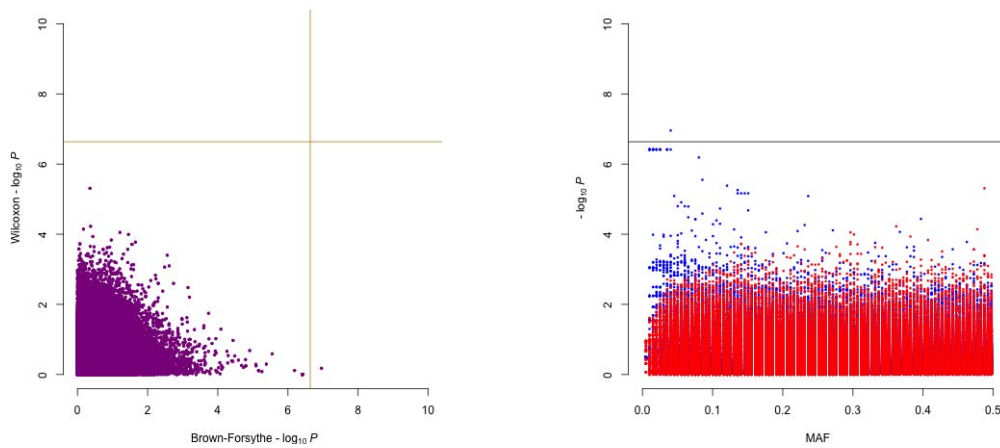

**Supplementary Figure B60 - Summary of vGWA results for 158: Silique 16**

**Histogram of the phenotype & QQ plots of the Brown-Forsythe  $p$ -values  
(blue: nominal  $p$ -values, green: genomic controlled)**

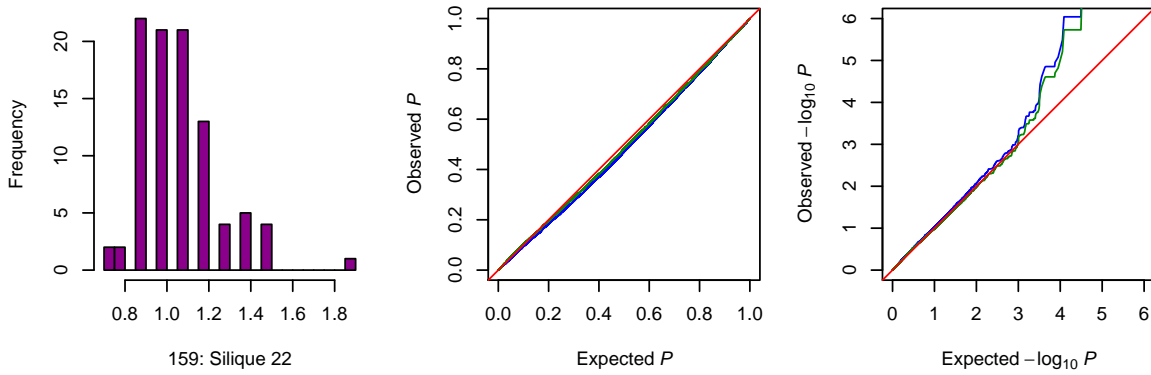

**Brown-Forsythe (colored, behind) & Wilcoxon (yellow, in front) results, genomic controlled**

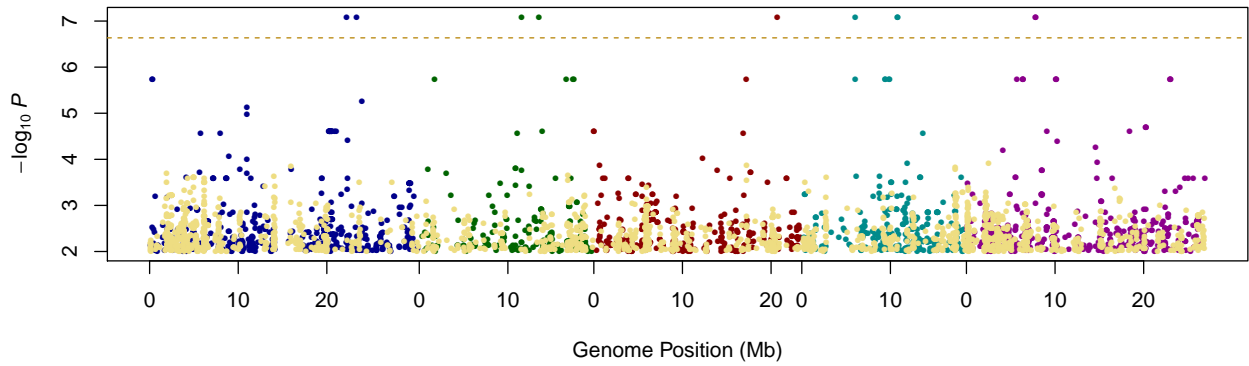

**Comparison of Brown-Forsythe & Wilcoxon  $p$ -values (MAF: minor allele frequency)**

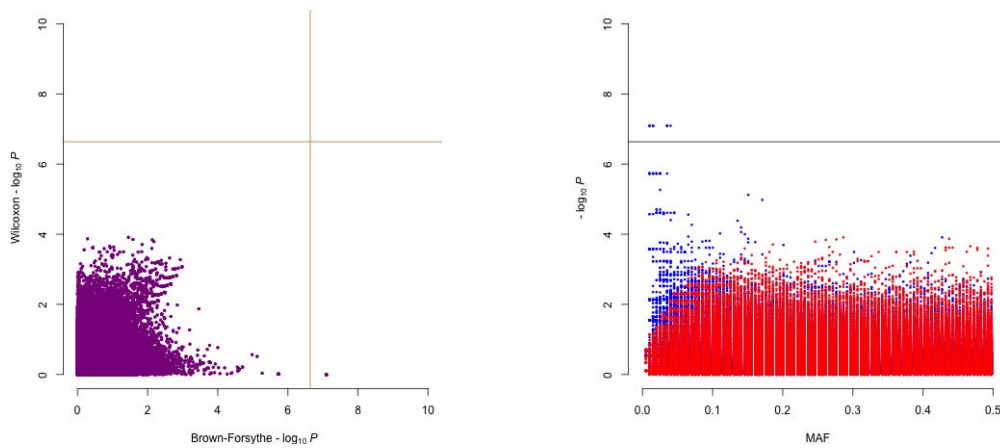

**Supplementary Figure B61 - Summary of vGWA results for 159: Silique 22**

**Histogram of the phenotype & QQ plots of the Brown-Forsythe  $p$ -values  
(blue: nominal  $p$ -values, green: genomic controlled)**

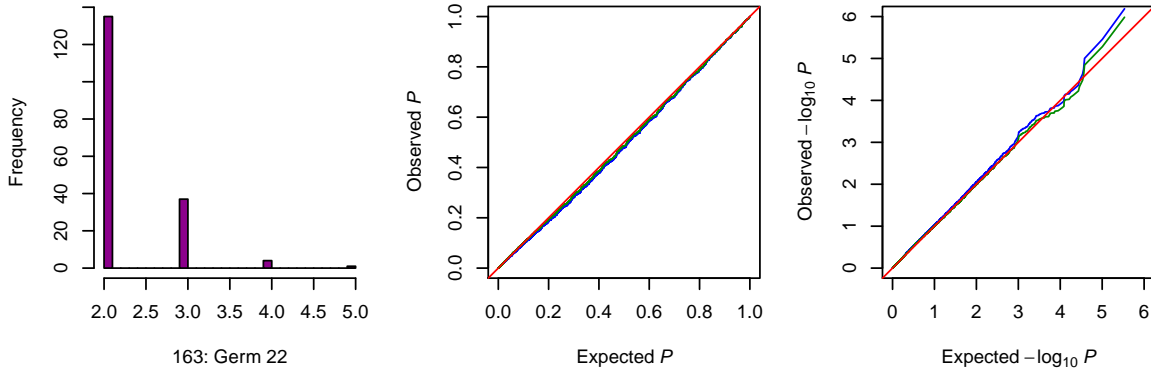

**Brown-Forsythe (colored, behind) & Wilcoxon (yellow, in front) results, genomic controlled**

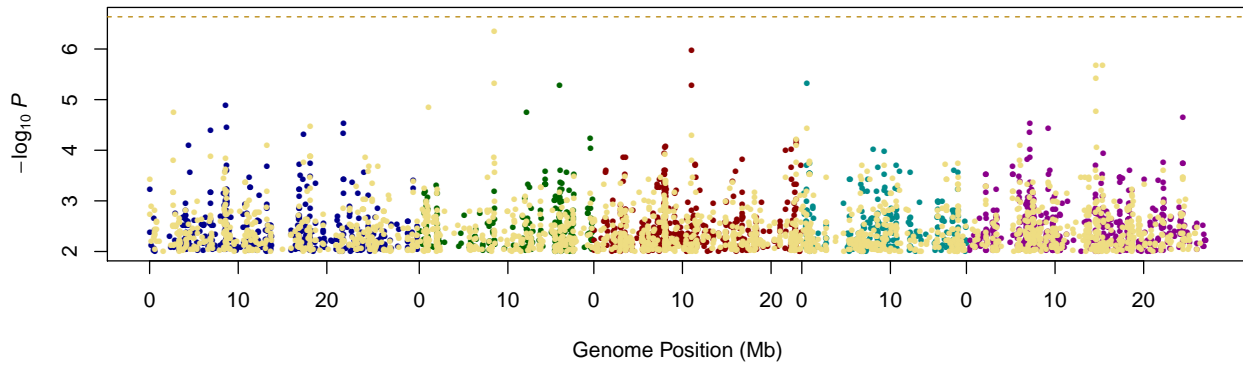

**Comparison of Brown-Forsythe & Wilcoxon  $p$ -values (MAF: minor allele frequency)**

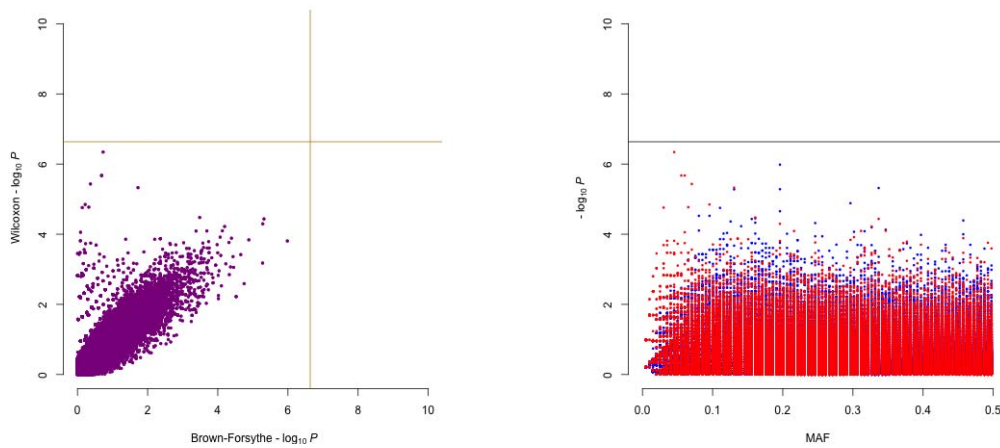

**Supplementary Figure B62 - Summary of vGWA results for 163: Germ 22**

**Histogram of the phenotype & QQ plots of the Brown-Forsythe  $p$ -values  
(blue: nominal  $p$ -values, green: genomic controlled)**

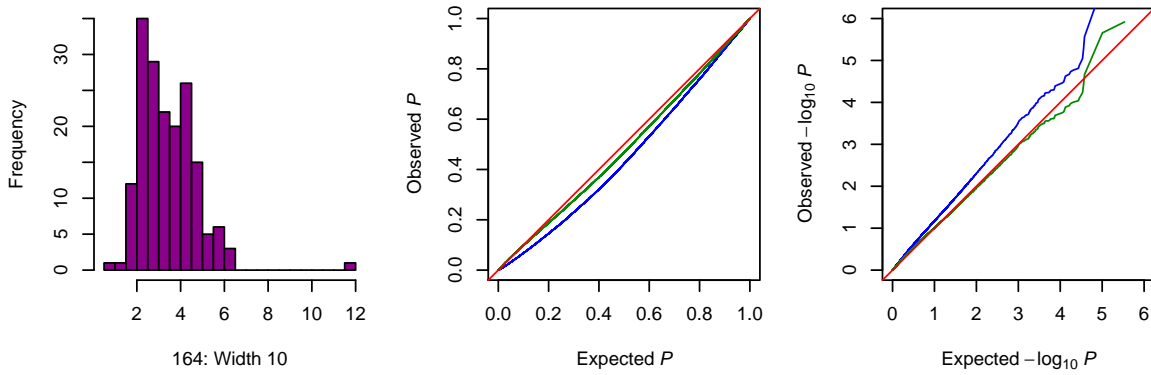

**Brown-Forsythe (colored, behind) & Wilcoxon (yellow, in front) results, genomic controlled**

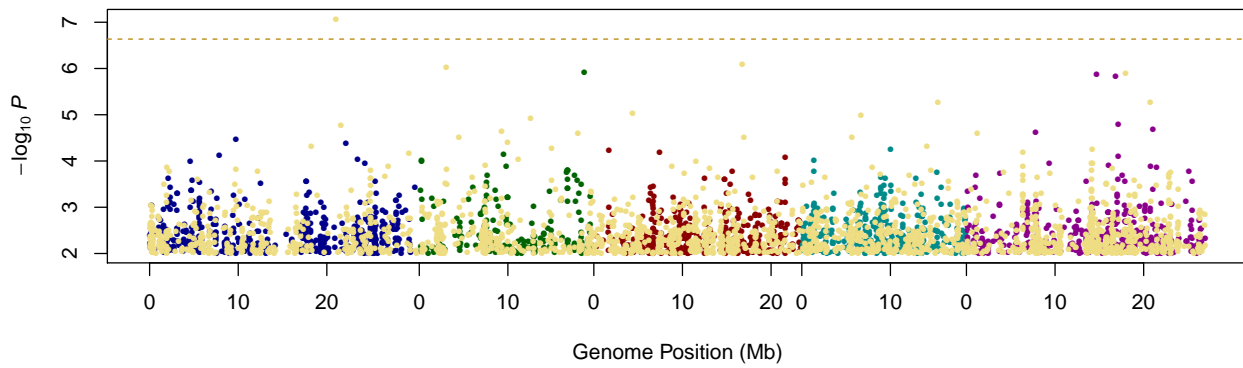

**Comparison of Brown-Forsythe & Wilcoxon  $p$ -values (MAF: minor allele frequency)**

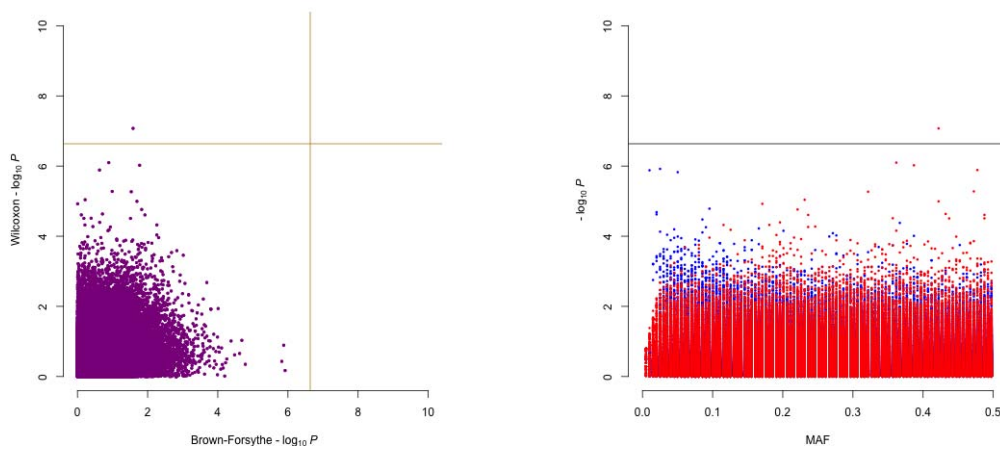

**Supplementary Figure B63 - Summary of vGWA results for 164: Width 10**

**Histogram of the phenotype & QQ plots of the Brown-Forsythe  $p$ -values  
(blue: nominal  $p$ -values, green: genomic controlled)**

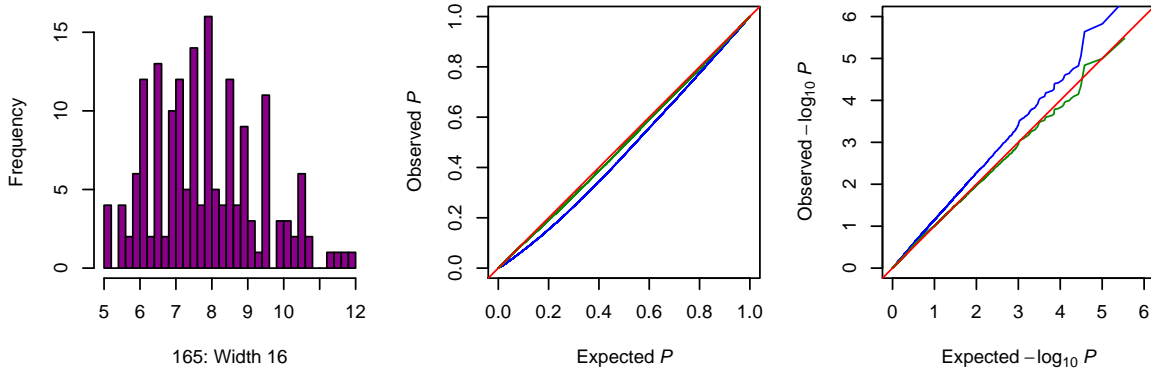

**Brown-Forsythe (colored, behind) & Wilcoxon (yellow, in front) results, genomic controlled**

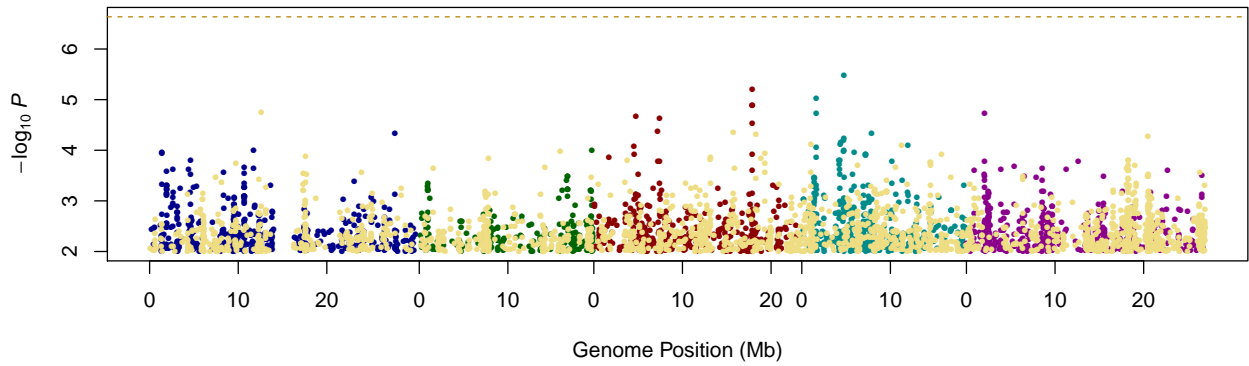

**Comparison of Brown-Forsythe & Wilcoxon  $p$ -values (MAF: minor allele frequency)**

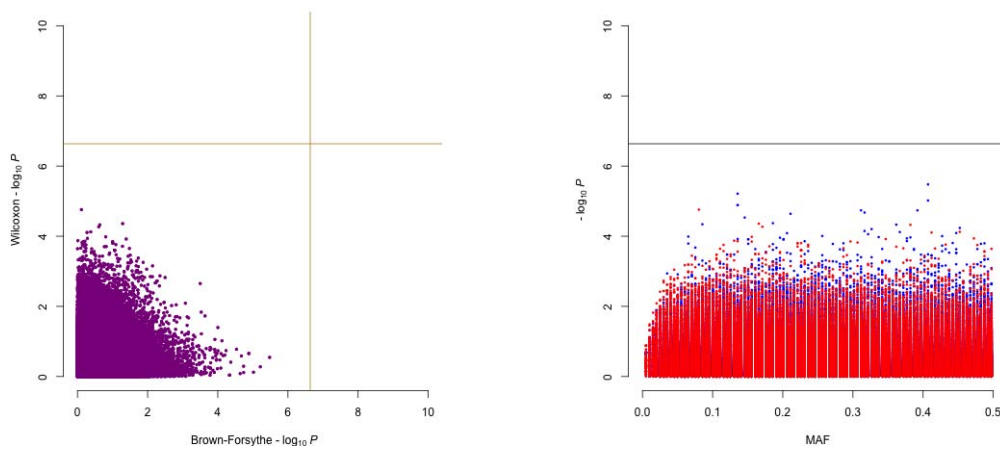

**Supplementary Figure B64 - Summary of vGWA results for 165: Width 16**



**Histogram of the phenotype & QQ plots of the Brown-Forsythe  $p$ -values  
(blue: nominal  $p$ -values, green: genomic controlled)**

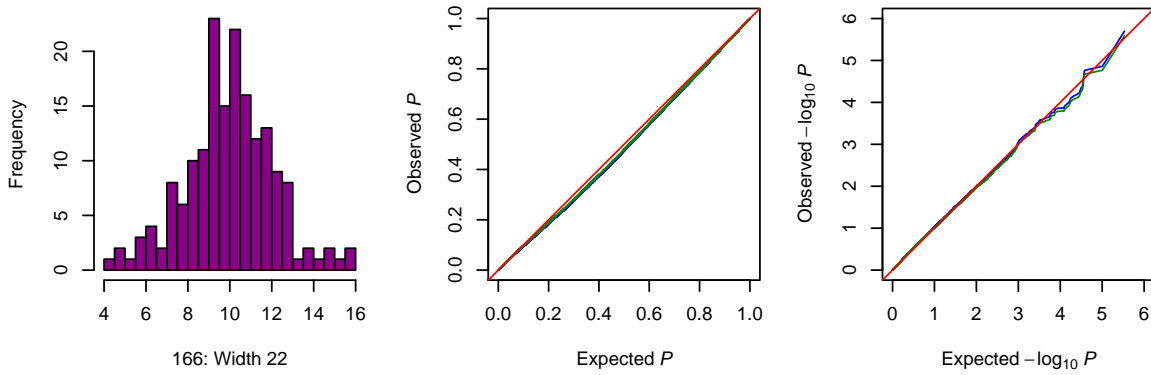

**Brown-Forsythe (colored, behind) & Wilcoxon (yellow, in front) results, genomic controlled**

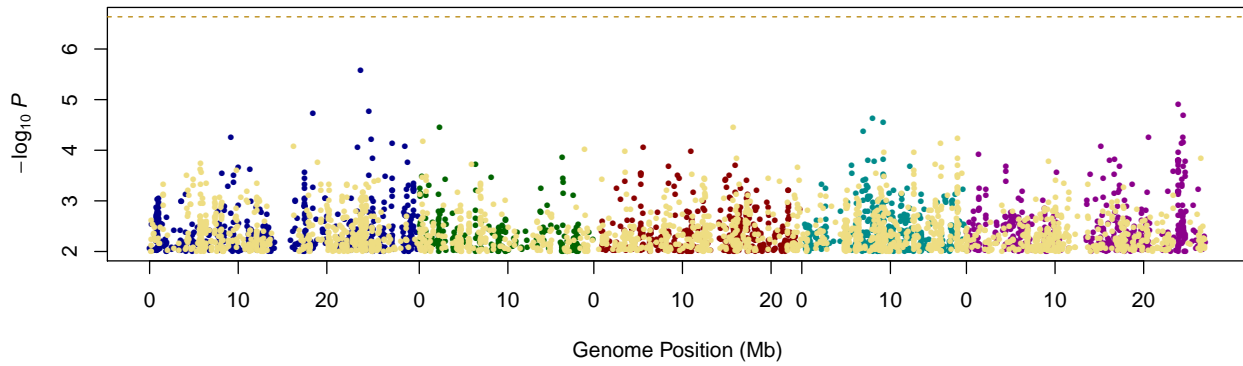

**Comparison of Brown-Forsythe & Wilcoxon  $p$ -values (MAF: minor allele frequency)**

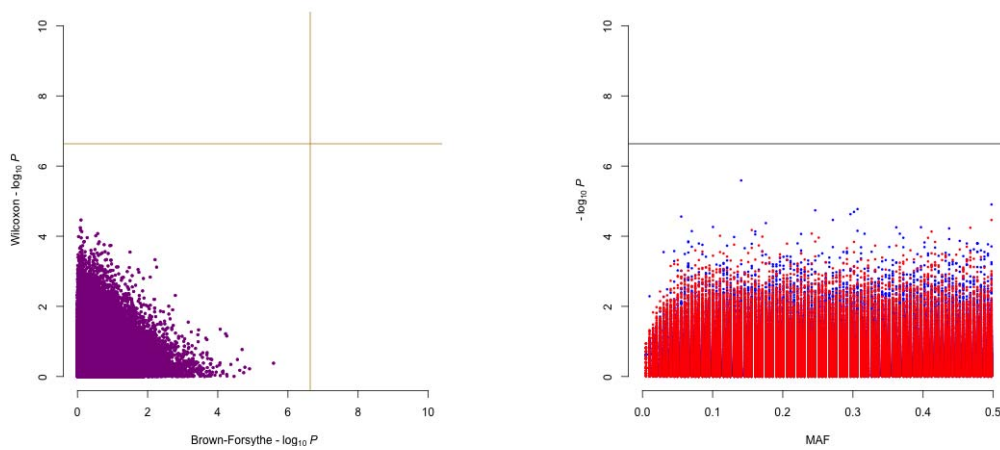

**Supplementary Figure B65 - Summary of vGWA results for 166: Width 22**

**Histogram of the phenotype & QQ plots of the Brown-Forsythe  $p$ -values  
(blue: nominal  $p$ -values, green: genomic controlled)**

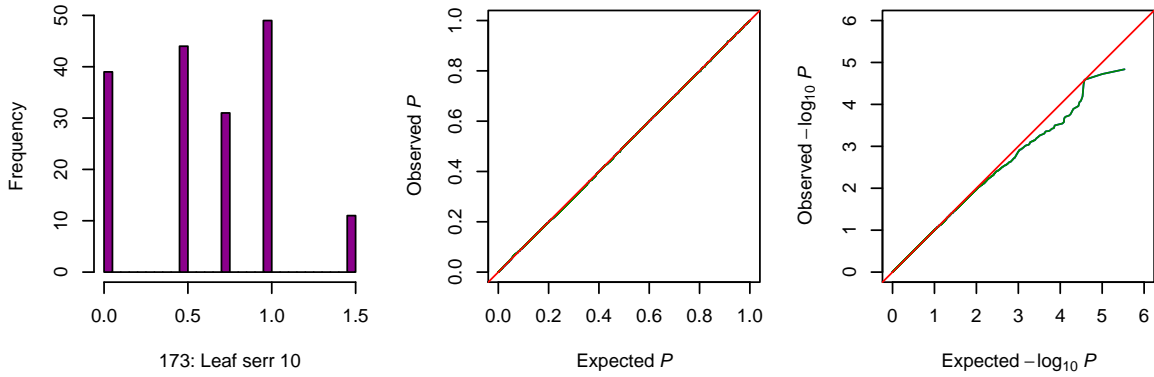

**Brown-Forsythe (colored, behind) & Wilcoxon (yellow, in front) results, genomic controlled**

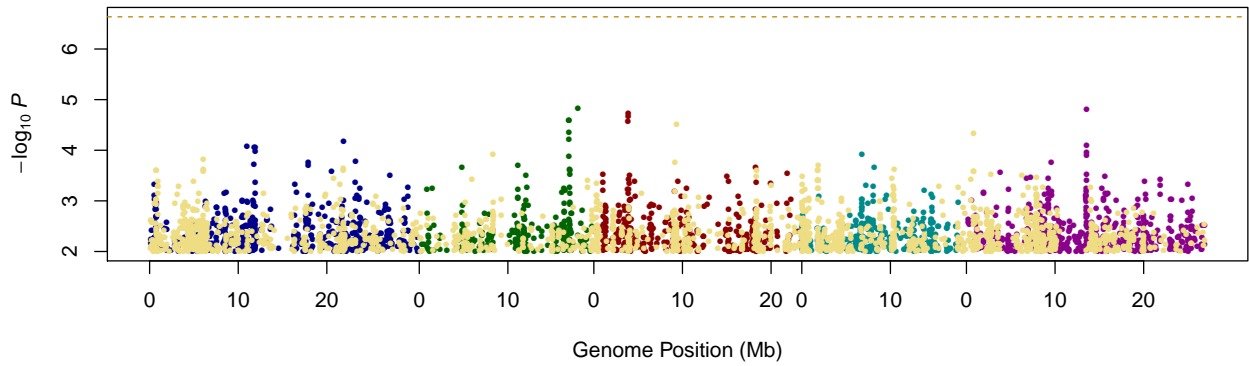

**Comparison of Brown-Forsythe & Wilcoxon  $p$ -values (MAF: minor allele frequency)**

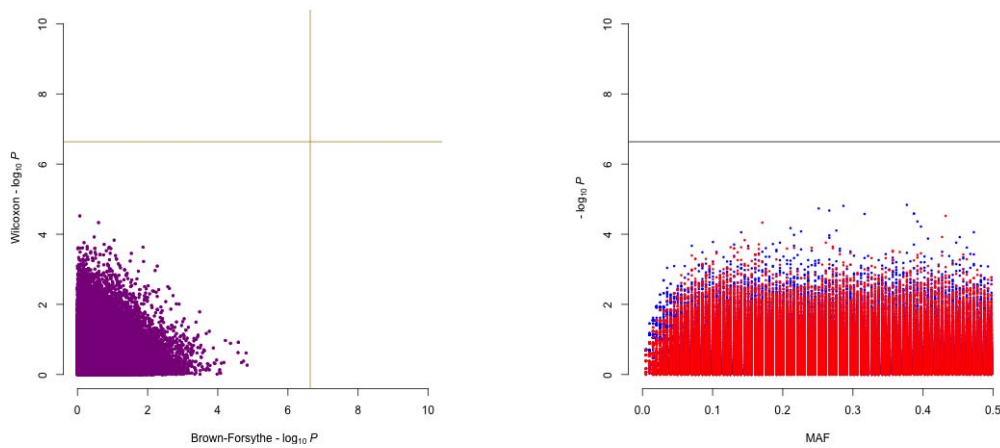

**Supplementary Figure B66 - Summary of vGWA results for 173: Leaf serr 10**

**Histogram of the phenotype & QQ plots of the Brown-Forsythe  $p$ -values  
(blue: nominal  $p$ -values, green: genomic controlled)**

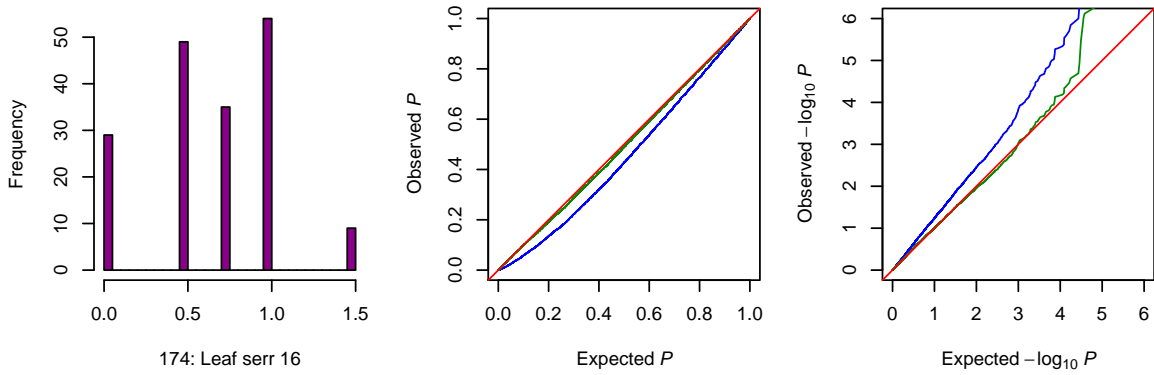

**Brown-Forsythe (colored, behind) & Wilcoxon (yellow, in front) results, genomic controlled**

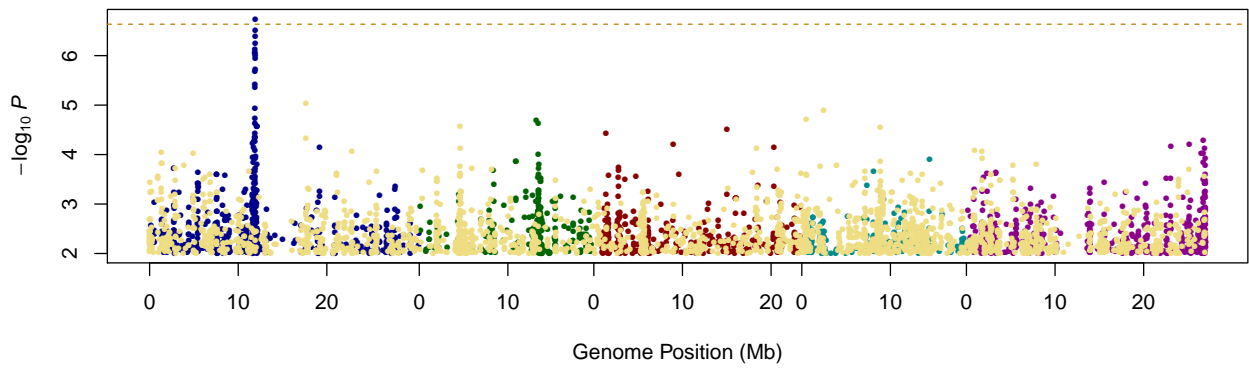

**Comparison of Brown-Forsythe & Wilcoxon  $p$ -values (MAF: minor allele frequency)**

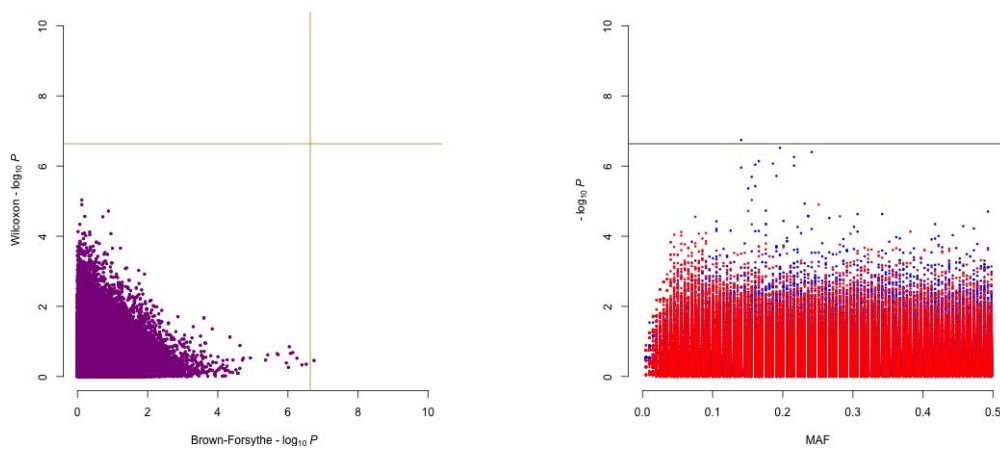

**Supplementary Figure B67 - Summary of vGWA results for 174: Leaf serr 16**

**Histogram of the phenotype & QQ plots of the Brown-Forsythe  $p$ -values  
(blue: nominal  $p$ -values, green: genomic controlled)**

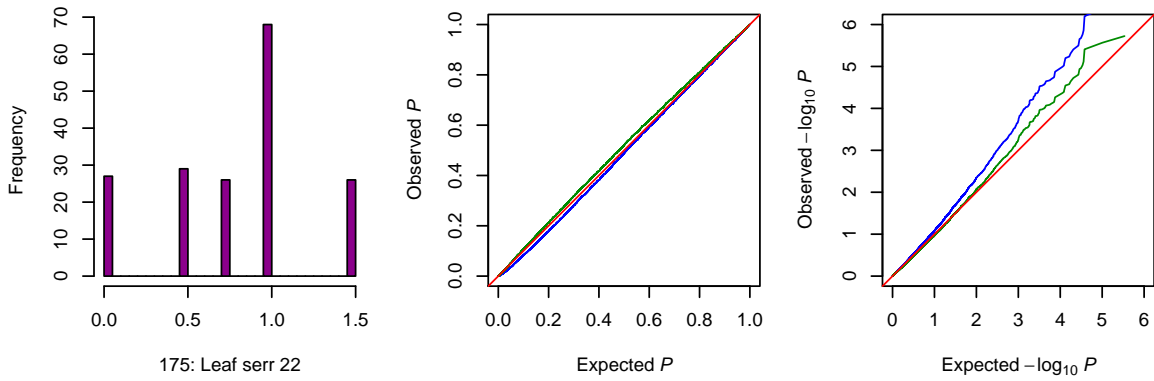

**Brown-Forsythe (colored, behind) & Wilcoxon (yellow, in front) results, genomic controlled**

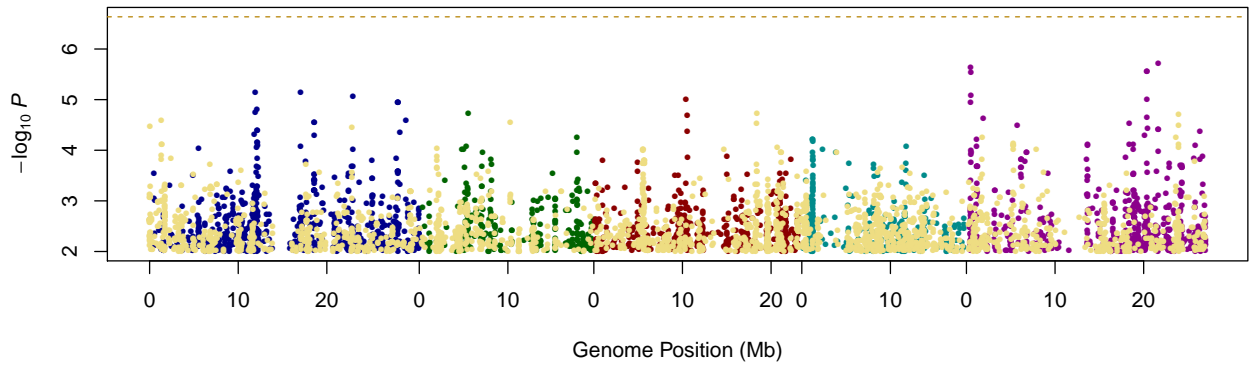

**Comparison of Brown-Forsythe & Wilcoxon  $p$ -values (MAF: minor allele frequency)**

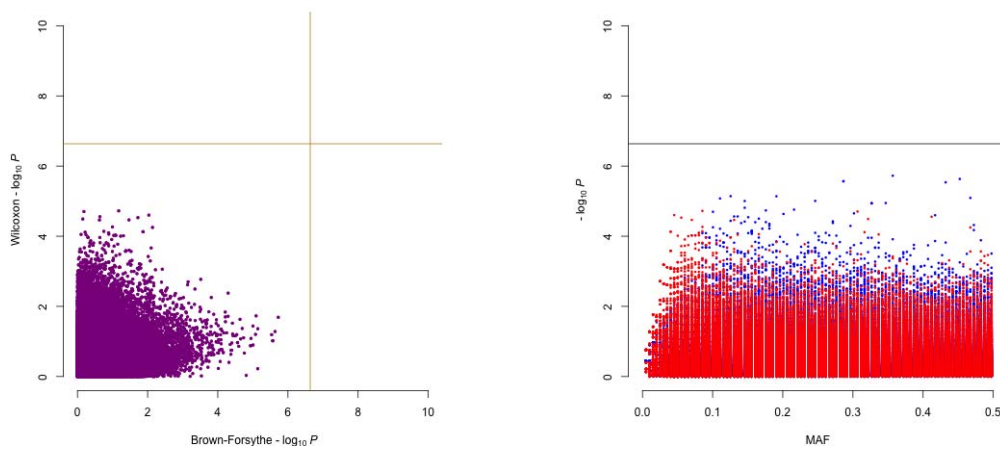

**Supplementary Figure B68 - Summary of vGWA results for 175: Leaf serr 22**

**Histogram of the phenotype & QQ plots of the Brown-Forsythe  $p$ -values  
(blue: nominal  $p$ -values, green: genomic controlled)**

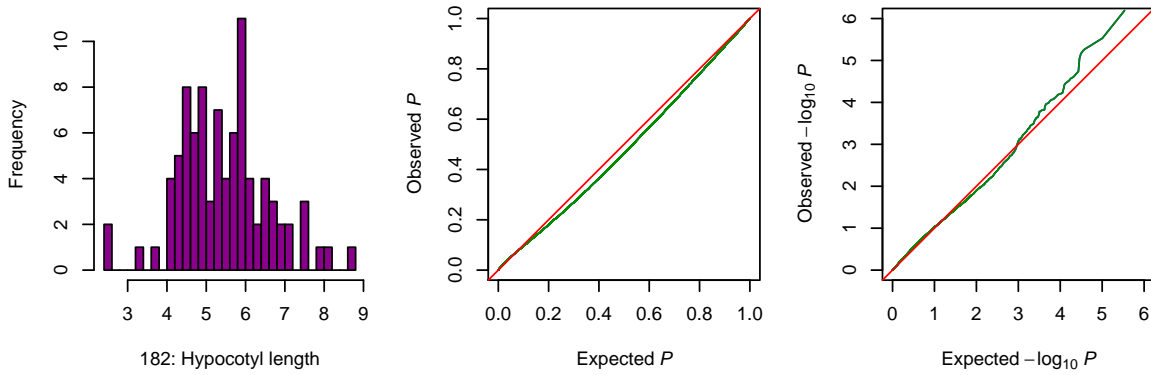

**Brown-Forsythe (colored, behind) & Wilcoxon (yellow, in front) results, genomic controlled**

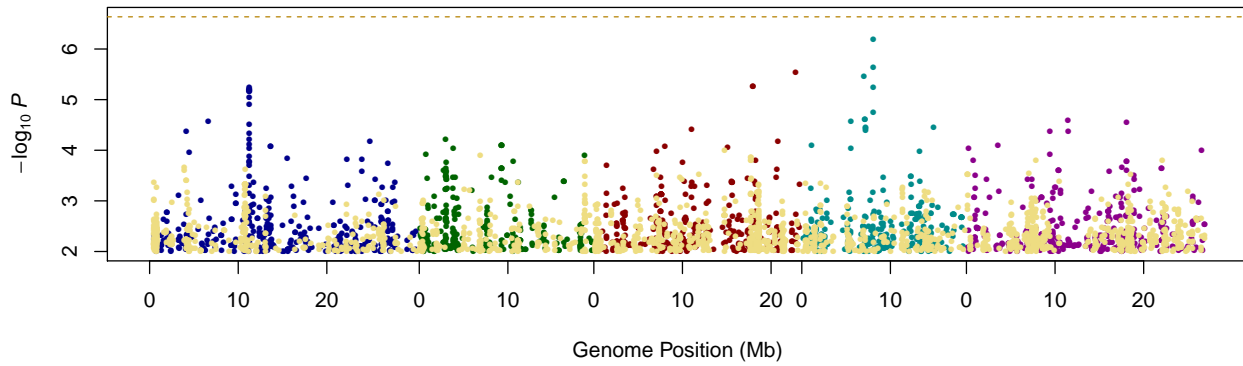

**Comparison of Brown-Forsythe & Wilcoxon  $p$ -values (MAF: minor allele frequency)**

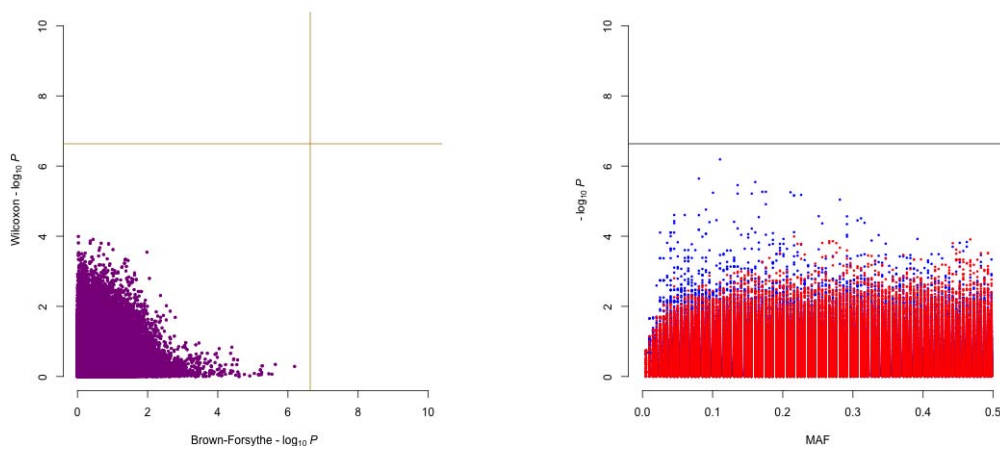

**Supplementary Figure B69 - Summary of vGWA results for 182: Hypocotyl length**

**Histogram of the phenotype & QQ plots of the Brown-Forsythe  $p$ -values  
(blue: nominal  $p$ -values, green: genomic controlled)**

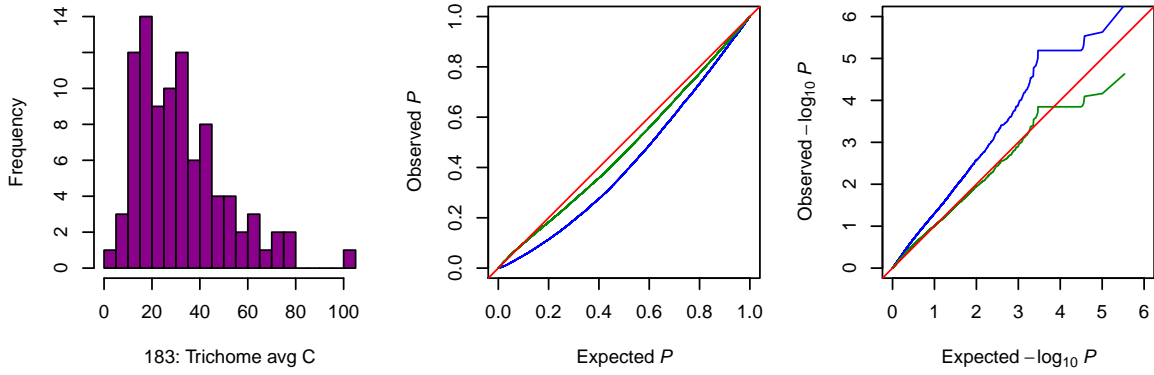

**Brown-Forsythe (colored, behind) & Wilcoxon (yellow, in front) results, genomic controlled**

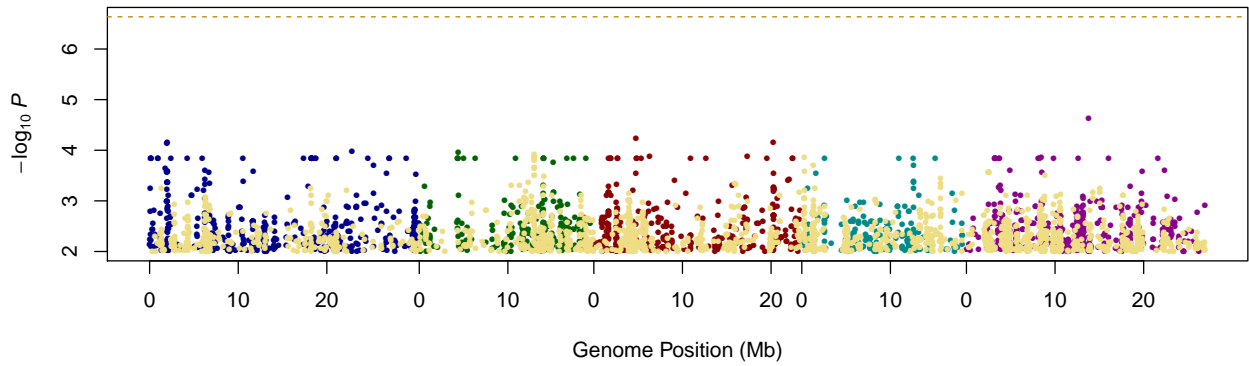

**Comparison of Brown-Forsythe & Wilcoxon  $p$ -values (MAF: minor allele frequency)**

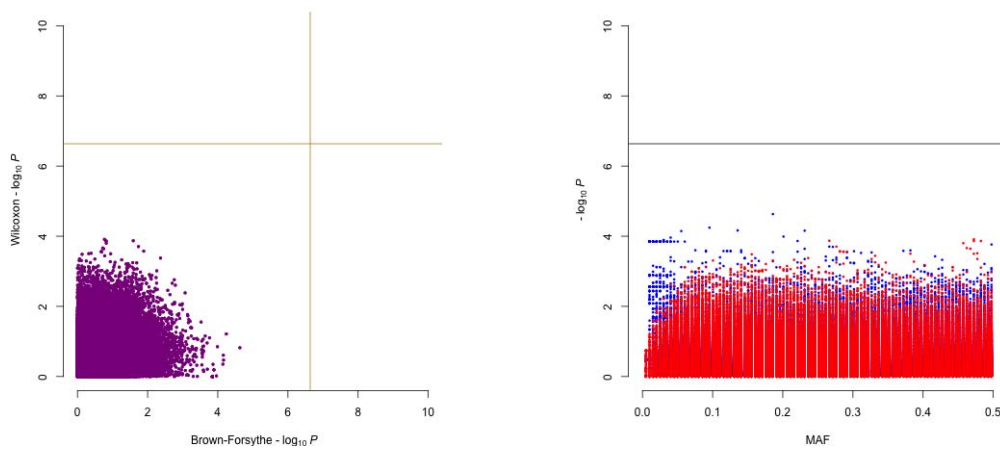

**Supplementary Figure B70 - Summary of vGWA results for 183: Trichome avg C**

**Histogram of the phenotype & QQ plots of the Brown-Forsythe  $p$ -values  
(blue: nominal  $p$ -values, green: genomic controlled)**

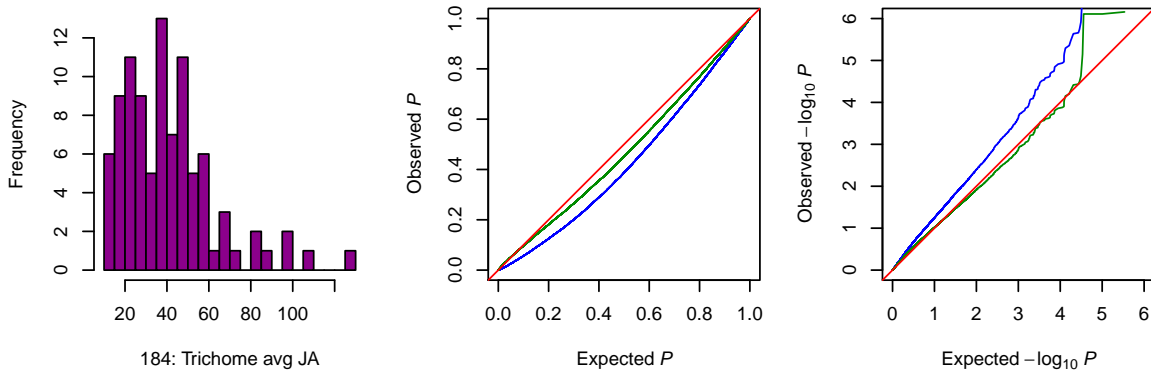

**Brown-Forsythe (colored, behind) & Wilcoxon (yellow, in front) results, genomic controlled**

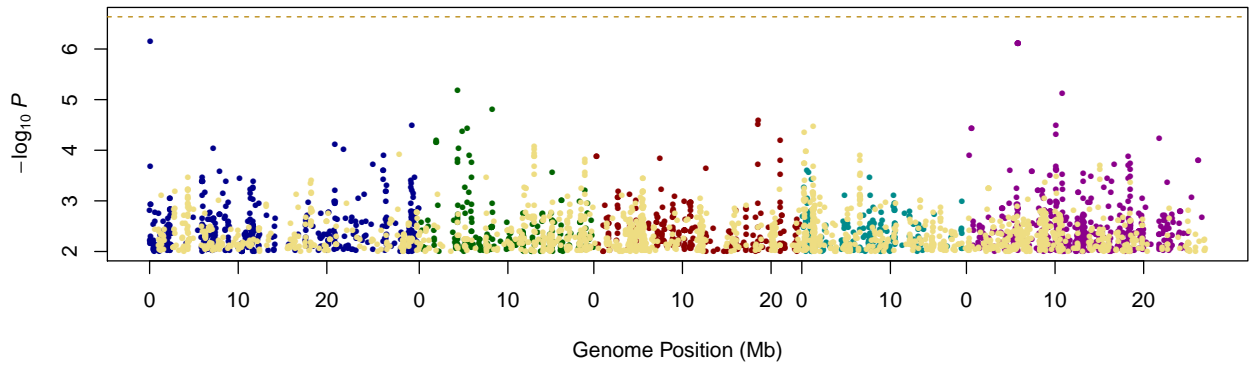

**Comparison of Brown-Forsythe & Wilcoxon  $p$ -values (MAF: minor allele frequency)**

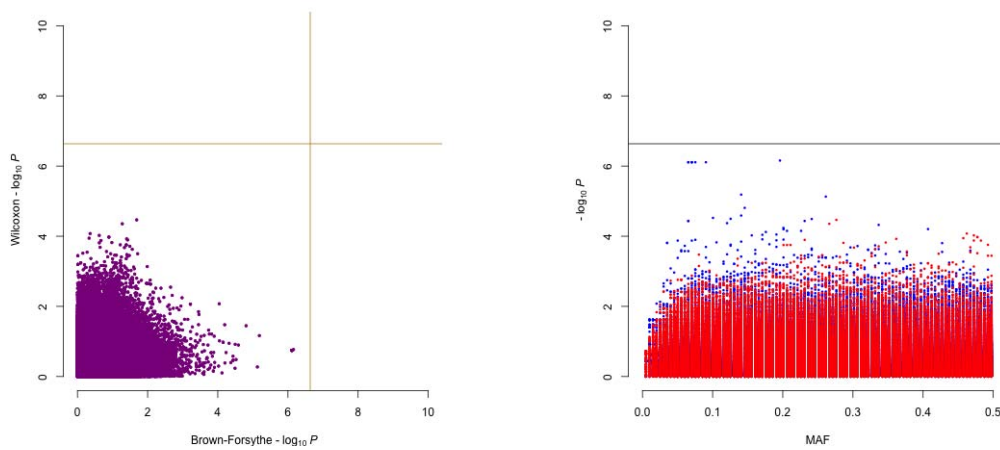

**Supplementary Figure B71 - Summary of vGWA results for 184: Trichome avg JA**

**Histogram of the phenotype & QQ plots of the Brown-Forsythe  $p$ -values  
(blue: nominal  $p$ -values, green: genomic controlled)**

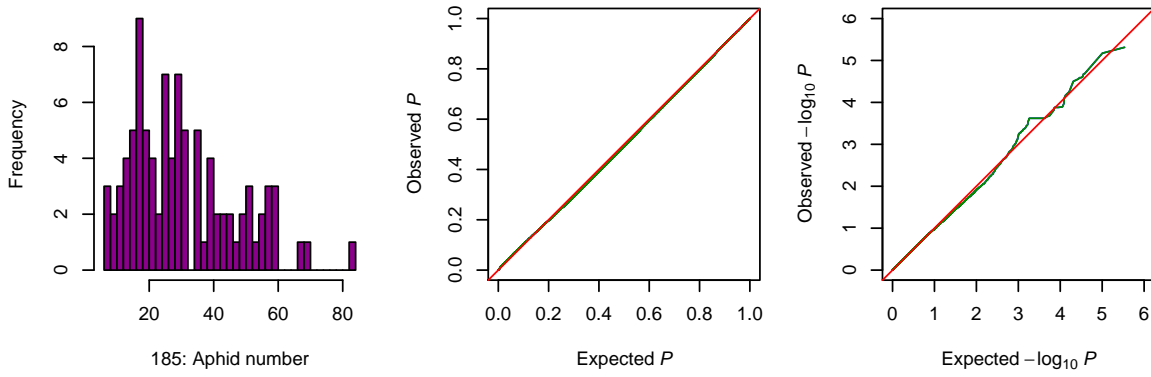

**Brown-Forsythe (colored, behind) & Wilcoxon (yellow, in front) results, genomic controlled**

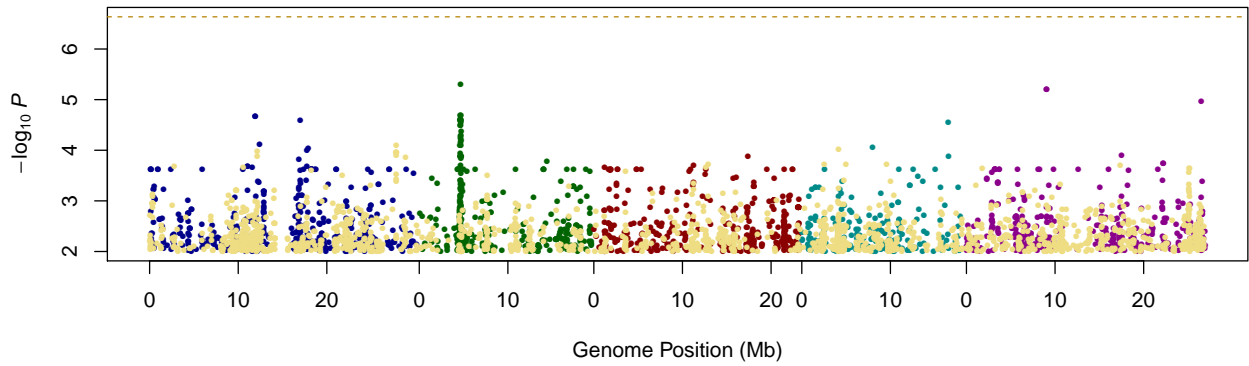

**Comparison of Brown-Forsythe & Wilcoxon  $p$ -values (MAF: minor allele frequency)**

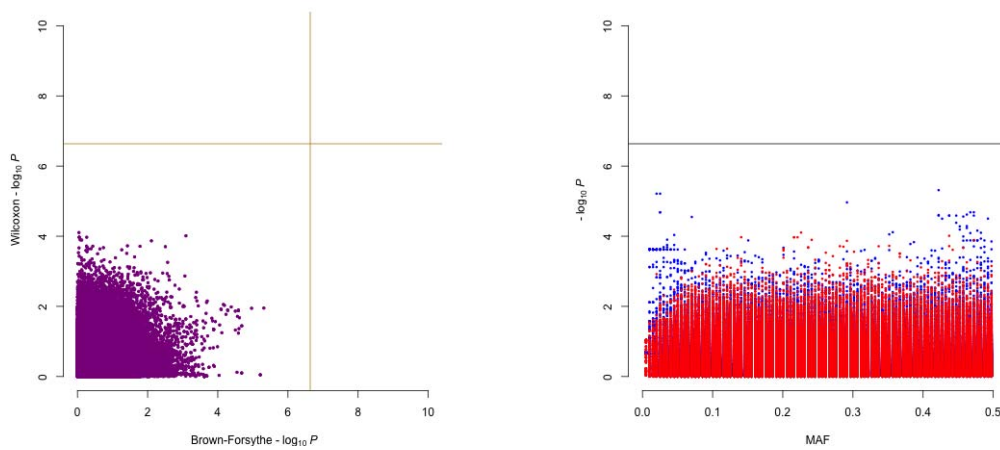

**Supplementary Figure B72 - Summary of vGWA results for 185: Aphid number**



**Histogram of the phenotype & QQ plots of the Brown-Forsythe  $p$ -values  
(blue: nominal  $p$ -values, green: genomic controlled)**

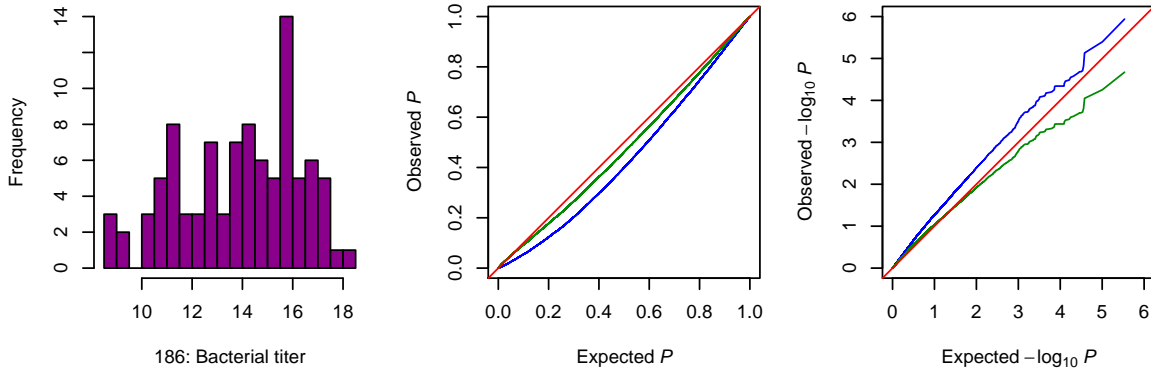

**Brown-Forsythe (colored, behind) & Wilcoxon (yellow, in front) results, genomic controlled**

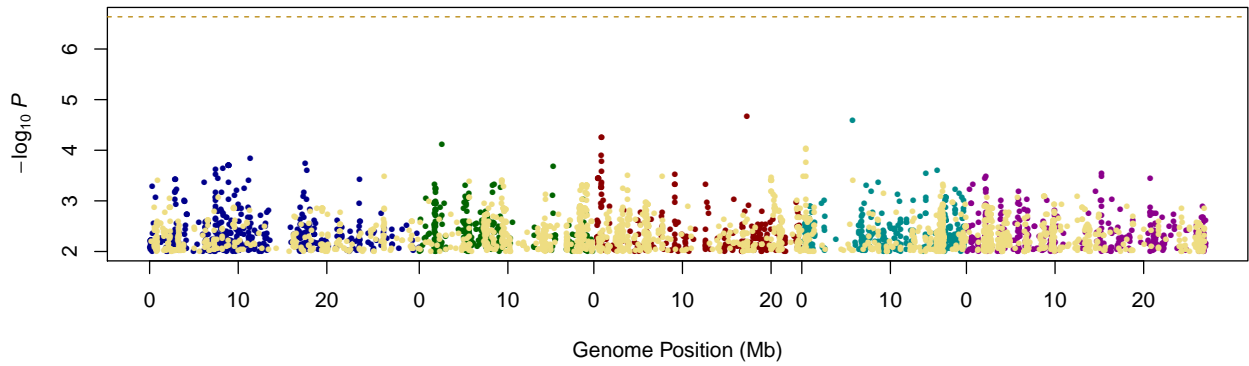

**Comparison of Brown-Forsythe & Wilcoxon  $p$ -values (MAF: minor allele frequency)**

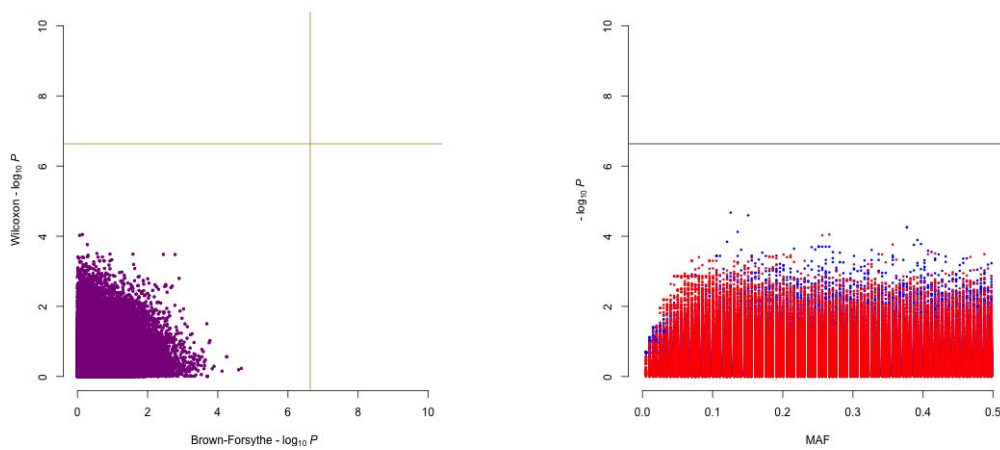

**Supplementary Figure B73 - Summary of vGWA results for 186: Bacterial titer**

**Histogram of the phenotype & QQ plots of the Brown-Forsythe  $p$ -values  
(blue: nominal  $p$ -values, green: genomic controlled)**

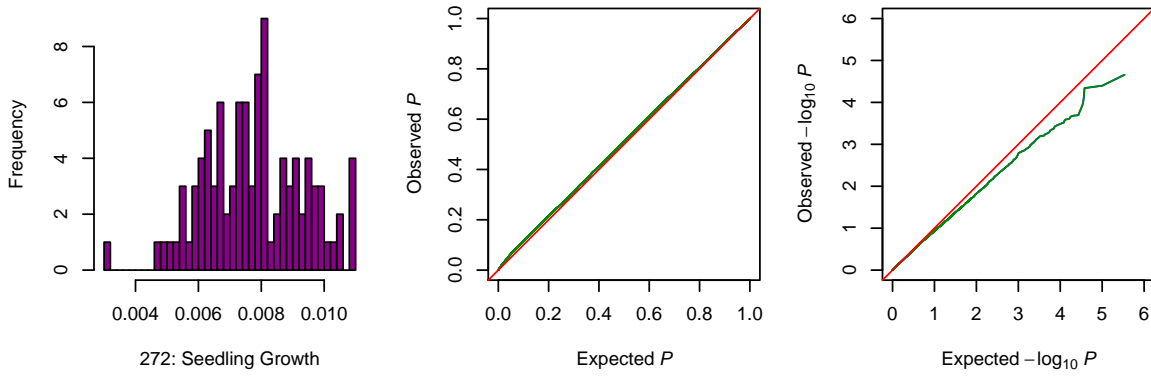

**Brown-Forsythe (colored, behind) & Wilcoxon (yellow, in front) results, genomic controlled**

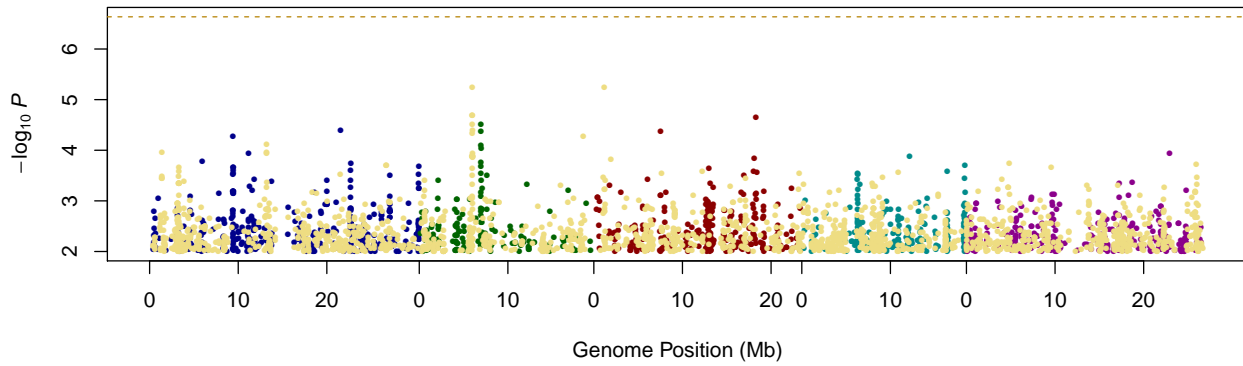

**Comparison of Brown-Forsythe & Wilcoxon  $p$ -values (MAF: minor allele frequency)**

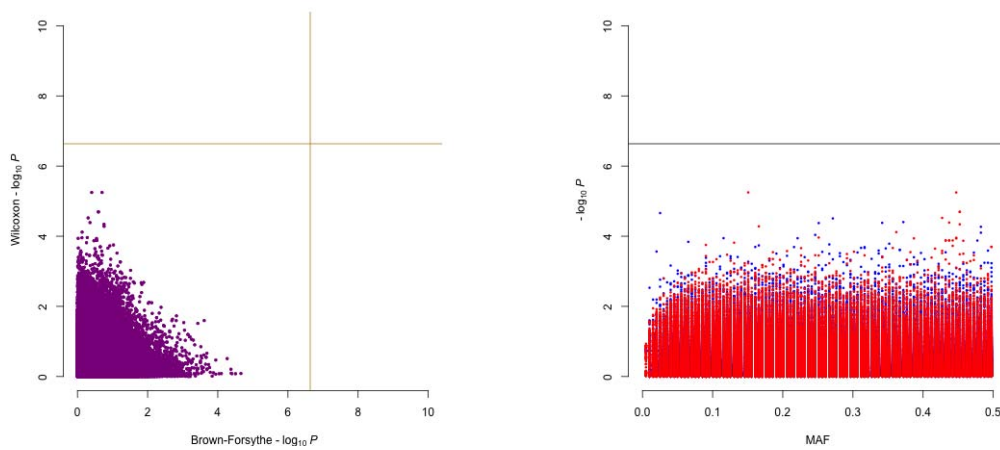

**Supplementary Figure B74 - Summary of vGWA results for 272: Seedling Growth**

**Histogram of the phenotype & QQ plots of the Brown-Forsythe  $p$ -values  
(blue: nominal  $p$ -values, green: genomic controlled)**

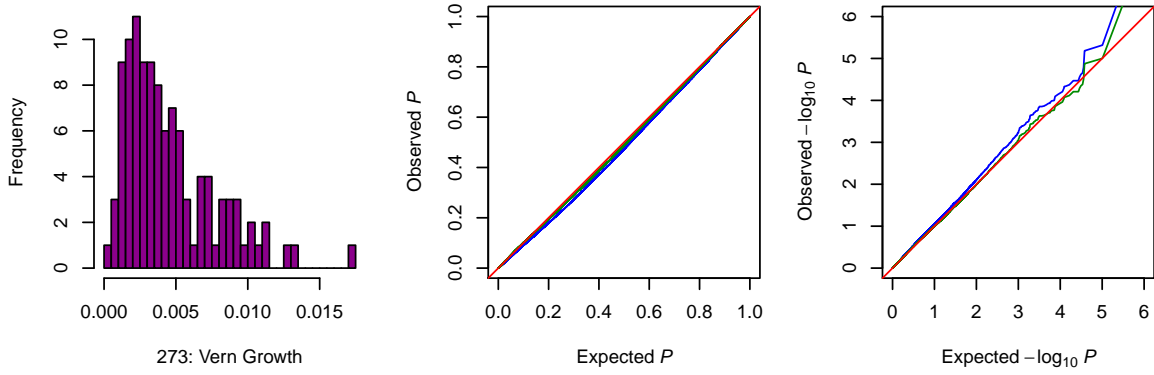

**Brown-Forsythe (colored, behind) & Wilcoxon (yellow, in front) results, genomic controlled**

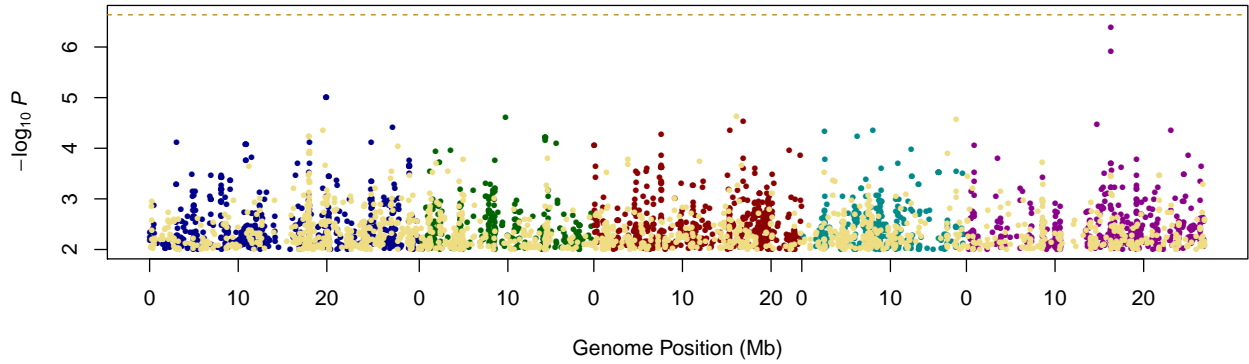

**Comparison of Brown-Forsythe & Wilcoxon  $p$ -values (MAF: minor allele frequency)**

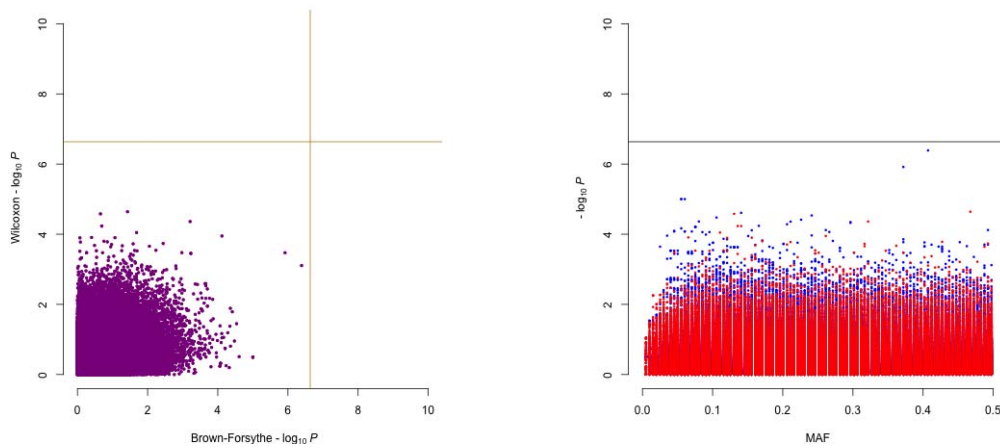

**Supplementary Figure B75 - Summary of vGWA results for 273: Vern Growth**

**Histogram of the phenotype & QQ plots of the Brown-Forsythe  $p$ -values  
(blue: nominal  $p$ -values, green: genomic controlled)**

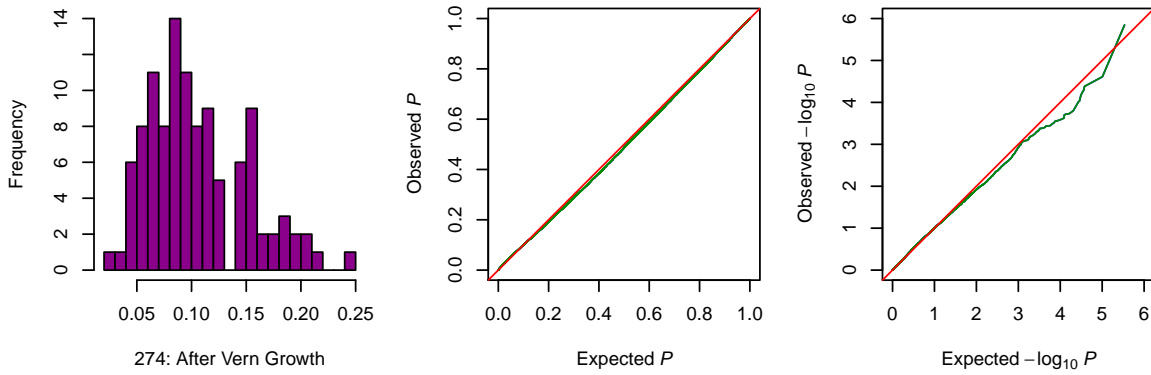

**Brown-Forsythe (colored, behind) & Wilcoxon (yellow, in front) results, genomic controlled**

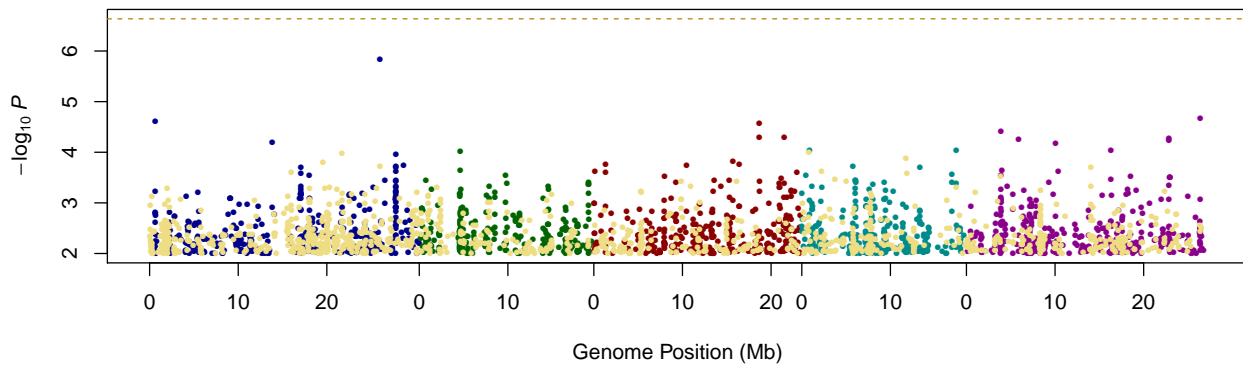

**Comparison of Brown-Forsythe & Wilcoxon  $p$ -values (MAF: minor allele frequency)**

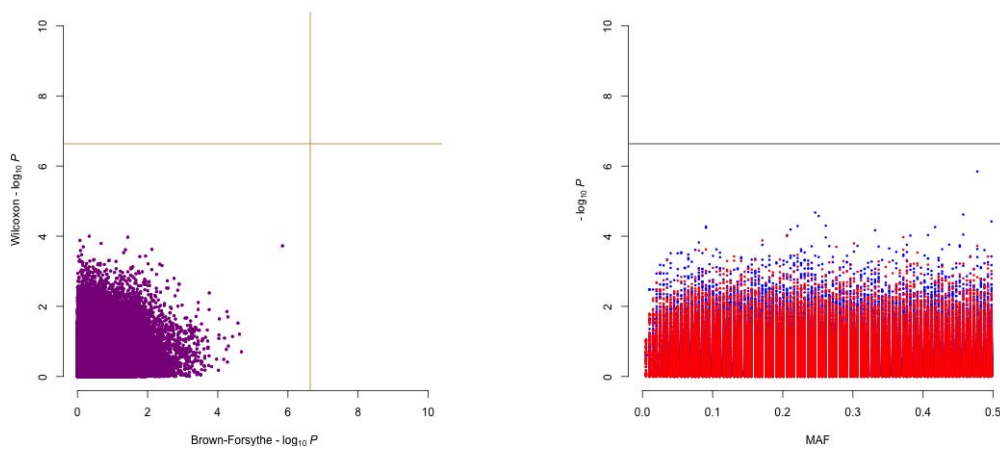

**Supplementary Figure B76 - Summary of vGWA results for 274: After Vern Growth**

**Histogram of the phenotype & QQ plots of the Brown-Forsythe  $p$ -values  
(blue: nominal  $p$ -values, green: genomic controlled)**

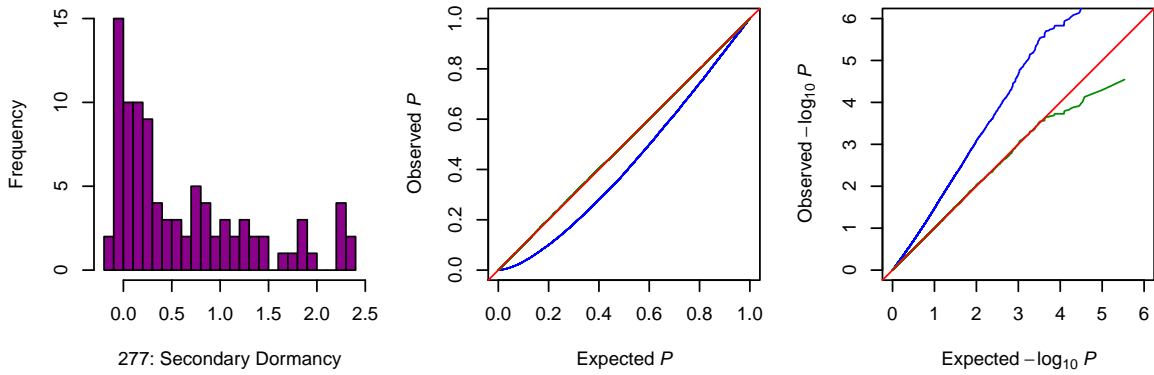

**Brown-Forsythe (colored, behind) & Wilcoxon (yellow, in front) results, genomic controlled**

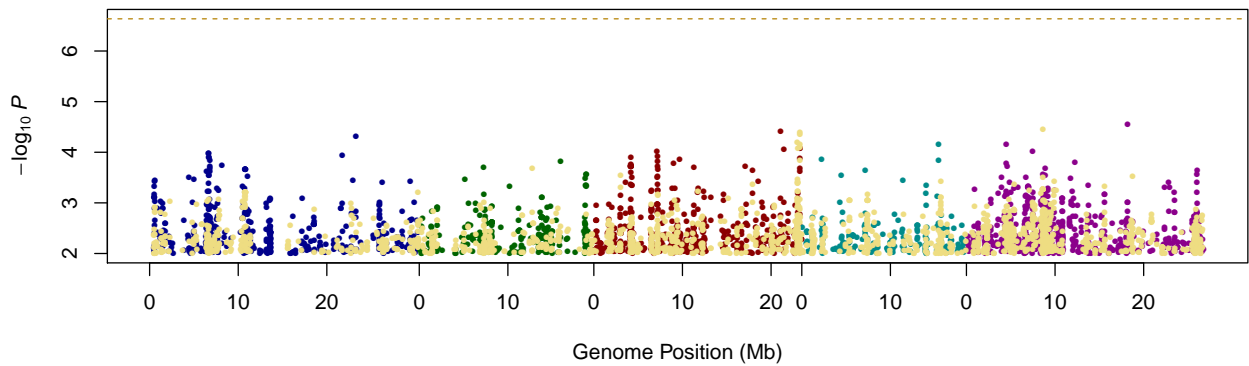

**Comparison of Brown-Forsythe & Wilcoxon  $p$ -values (MAF: minor allele frequency)**

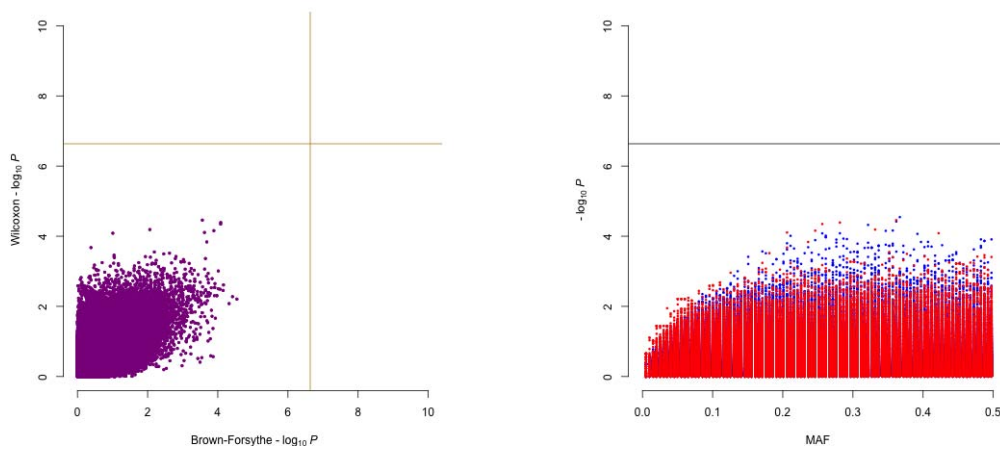

**Supplementary Figure B77 - Summary of vGWA results for 277: Secondary Dormancy**

**Histogram of the phenotype & QQ plots of the Brown-Forsythe  $p$ -values  
(blue: nominal  $p$ -values, green: genomic controlled)**

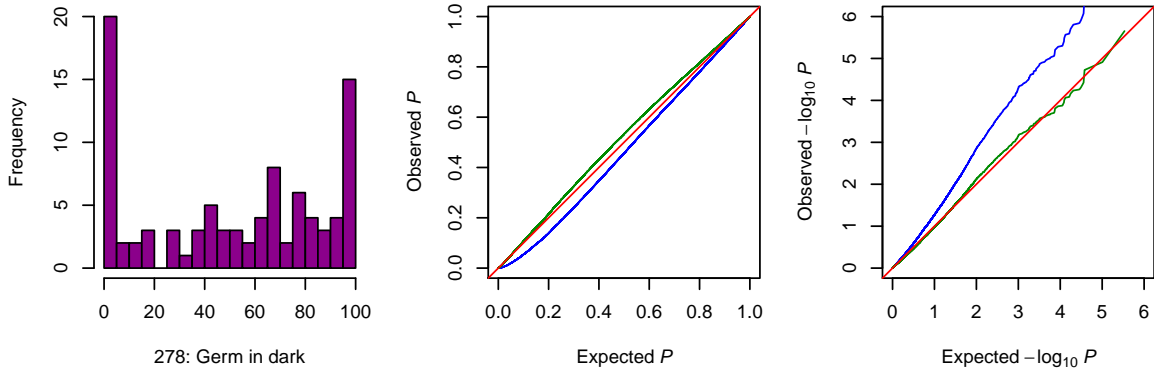

**Brown-Forsythe (colored, behind) & Wilcoxon (yellow, in front) results, genomic controlled**

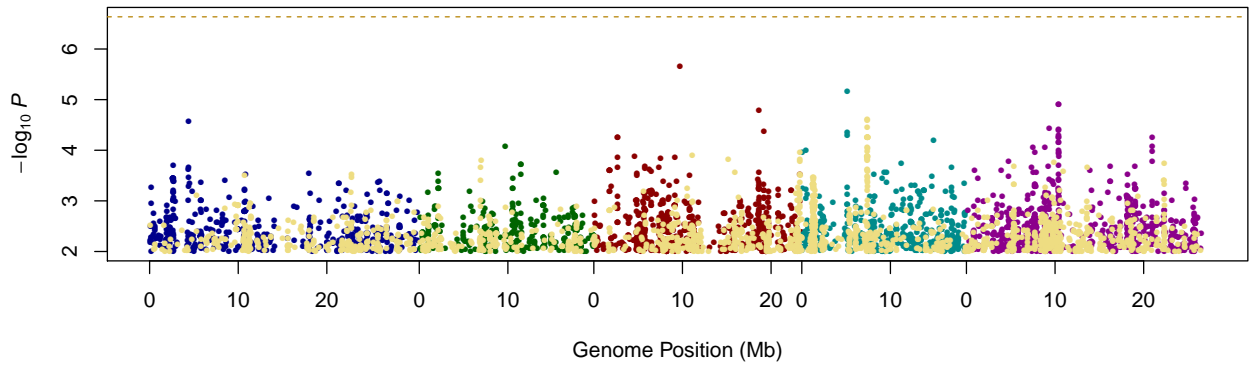

**Comparison of Brown-Forsythe & Wilcoxon  $p$ -values (MAF: minor allele frequency)**

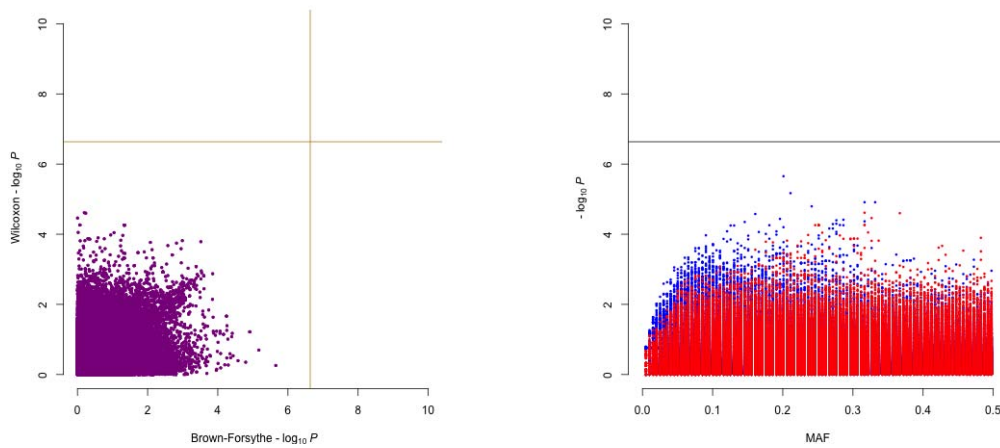

**Supplementary Figure B78 - Summary of vGWA results for 278: Germ in dark**

**Histogram of the phenotype & QQ plots of the Brown-Forsythe  $p$ -values  
(blue: nominal  $p$ -values, green: genomic controlled)**

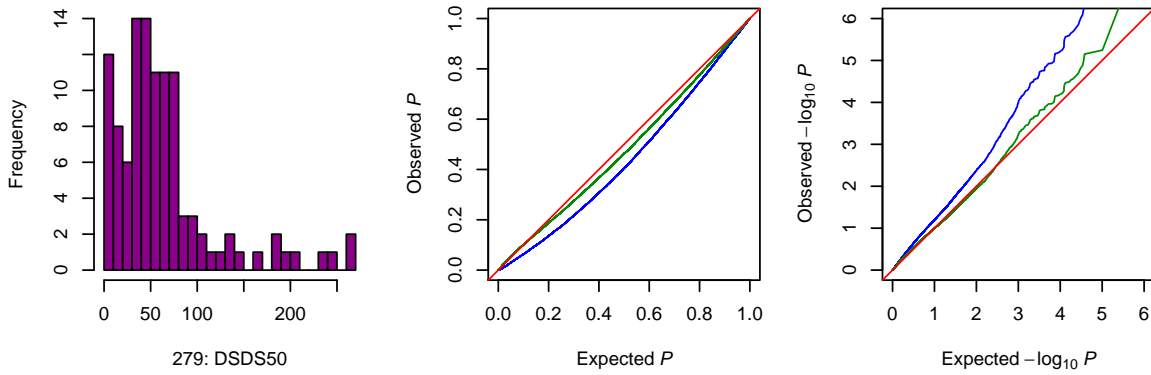

**Brown-Forsythe (colored, behind) & Wilcoxon (yellow, in front) results, genomic controlled**

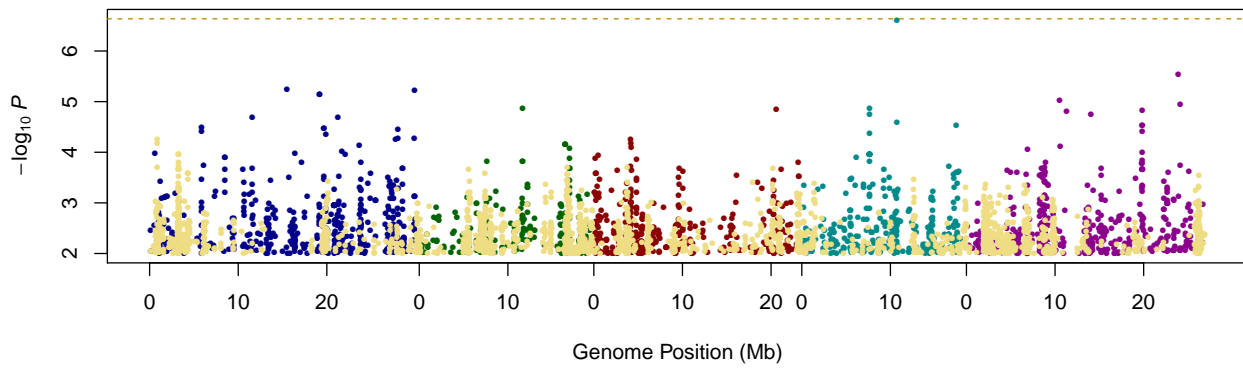

**Comparison of Brown-Forsythe & Wilcoxon  $p$ -values (MAF: minor allele frequency)**

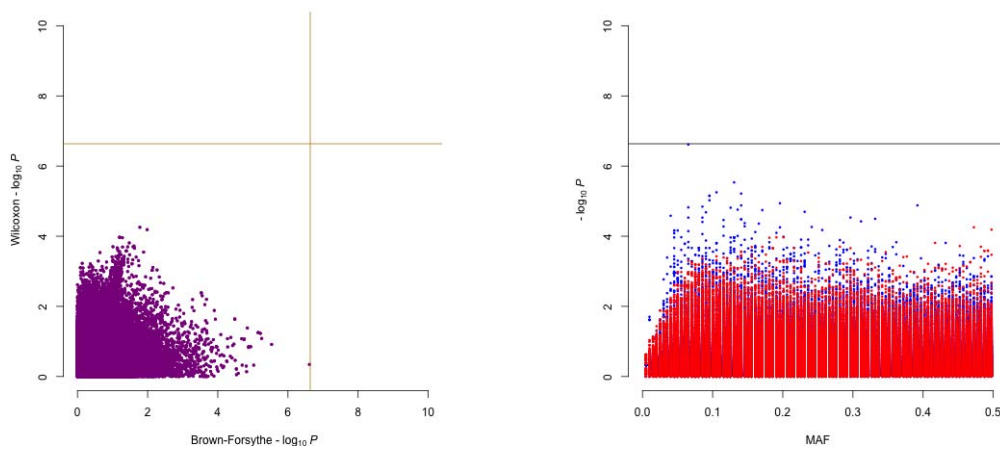

**Supplementary Figure B79 - Summary of vGWA results for 279: DSDS50**

**Histogram of the phenotype & QQ plots of the Brown-Forsythe  $p$ -values  
(blue: nominal  $p$ -values, green: genomic controlled)**

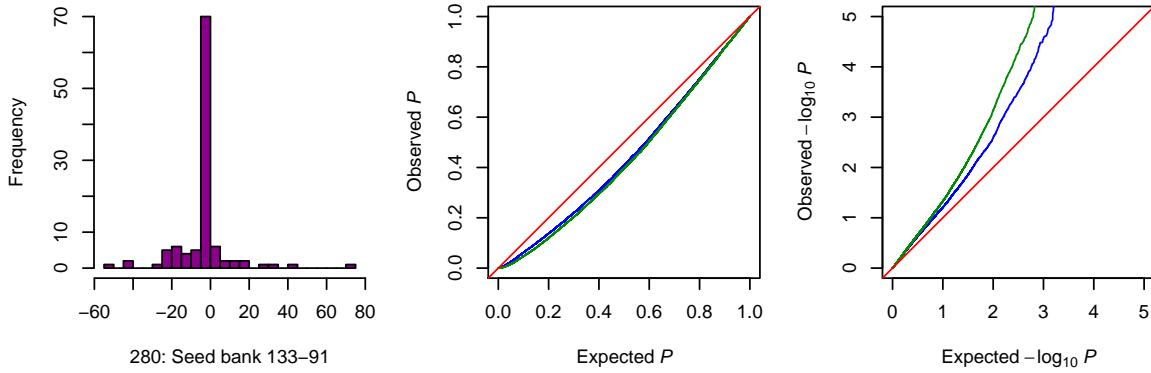

**Brown-Forsythe (colored, behind) & Wilcoxon (yellow, in front) results, genomic controlled**

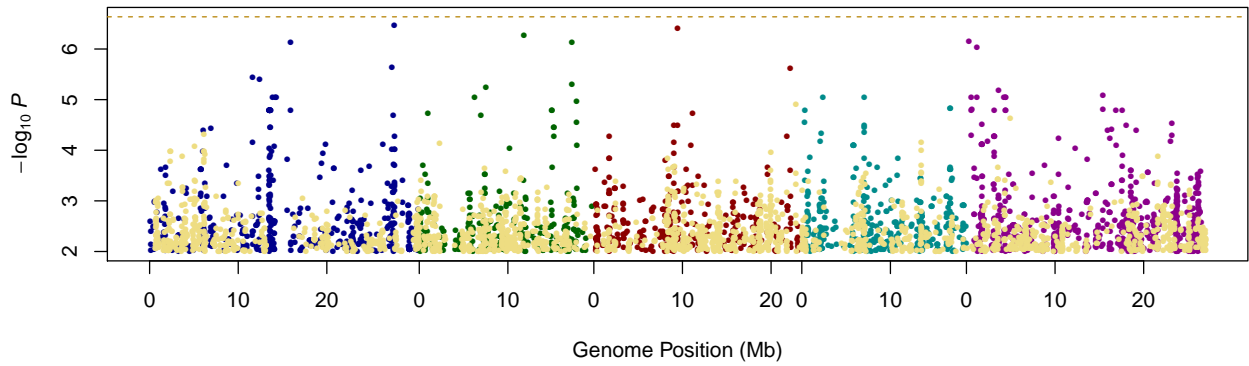

**Comparison of Brown-Forsythe & Wilcoxon  $p$ -values (MAF: minor allele frequency)**

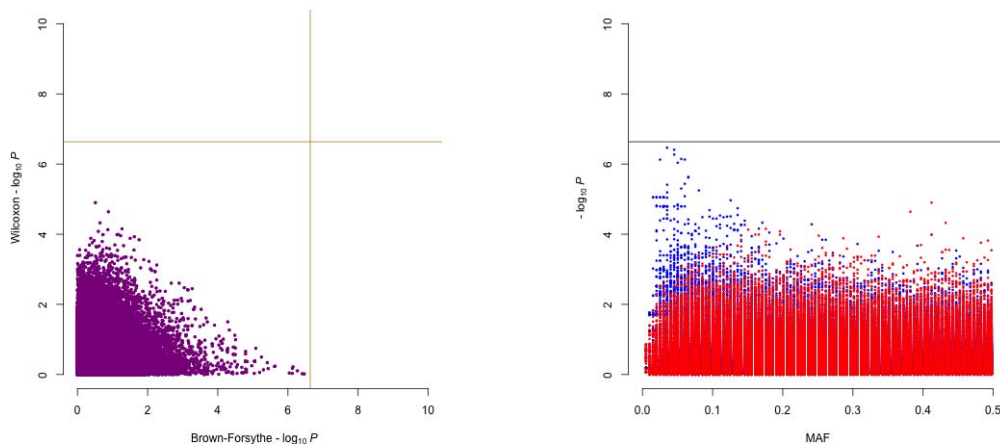

**Supplementary Figure B80 - Summary of vGWA results for 280: Seed bank 133-91**



**Histogram of the phenotype & QQ plots of the Brown-Forsythe  $p$ -values  
(blue: nominal  $p$ -values, green: genomic controlled)**

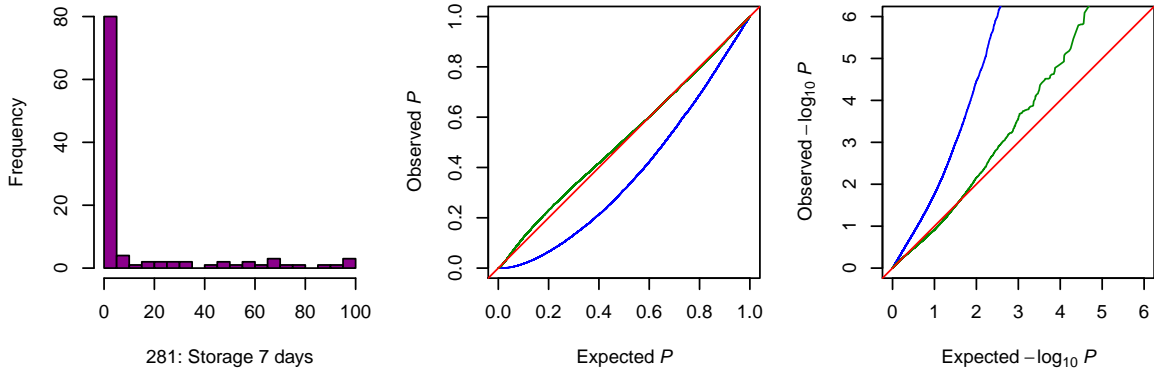

**Brown-Forsythe (colored, behind) & Wilcoxon (yellow, in front) results, genomic controlled**

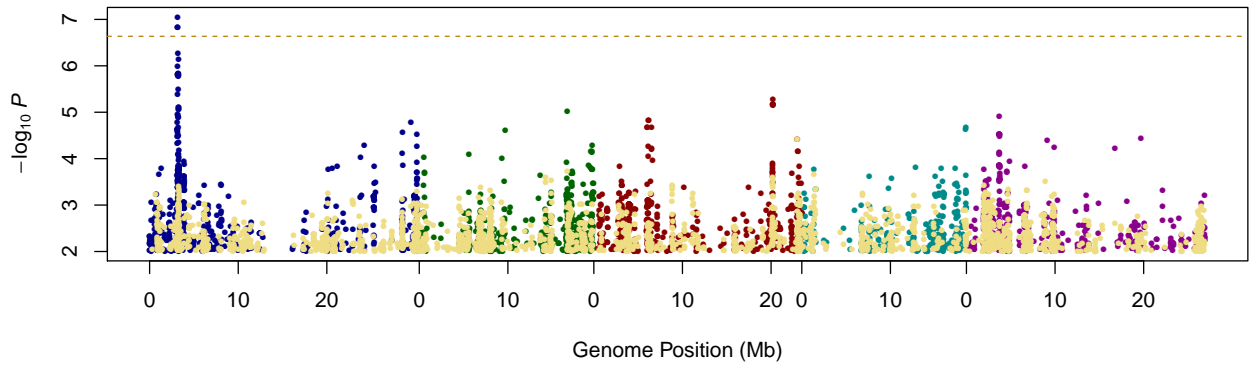

**Comparison of Brown-Forsythe & Wilcoxon  $p$ -values (MAF: minor allele frequency)**

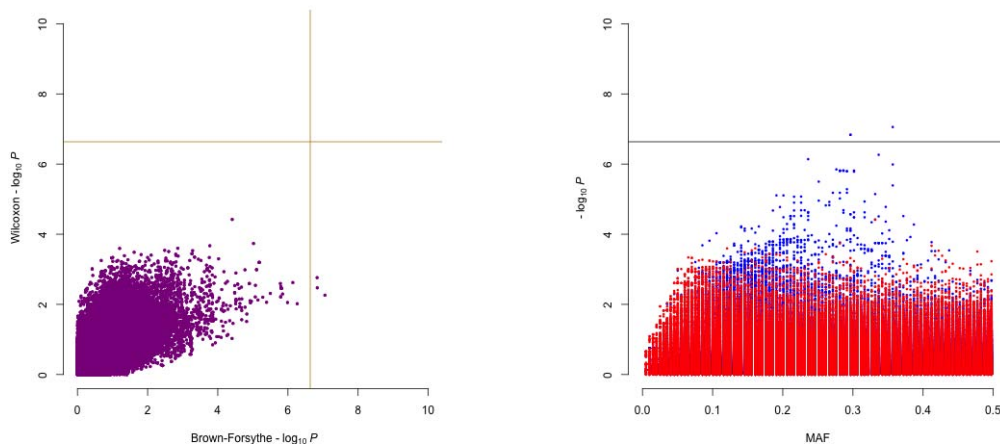

**Supplementary Figure B81 - Summary of vGWA results for 281: Storage 7 days**

**Histogram of the phenotype & QQ plots of the Brown-Forsythe  $p$ -values  
(blue: nominal  $p$ -values, green: genomic controlled)**

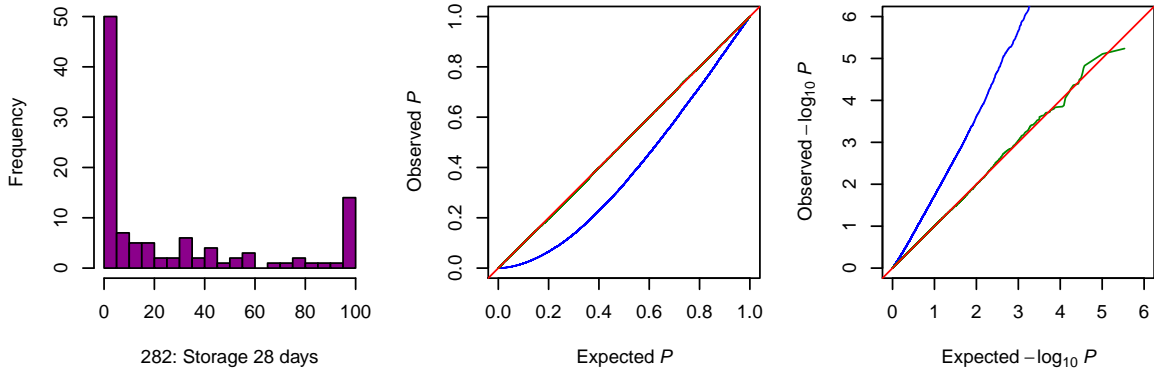

**Brown-Forsythe (colored, behind) & Wilcoxon (yellow, in front) results, genomic controlled**

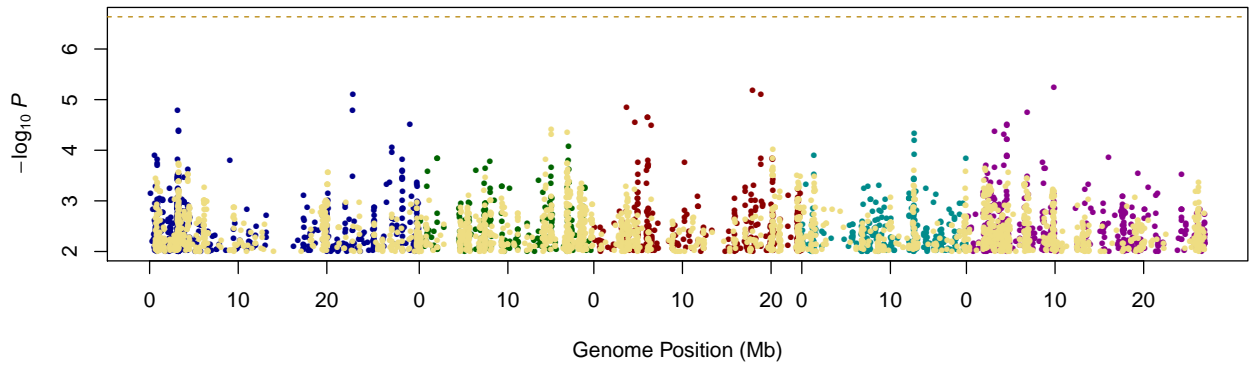

**Comparison of Brown-Forsythe & Wilcoxon  $p$ -values (MAF: minor allele frequency)**

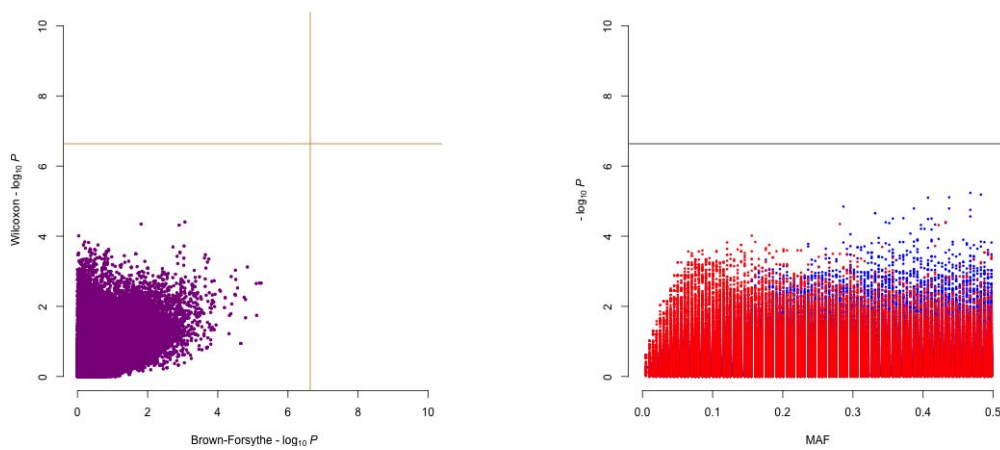

**Supplementary Figure B82 - Summary of vGWA results for 282: Storage 28 days**

**Histogram of the phenotype & QQ plots of the Brown-Forsythe  $p$ -values  
(blue: nominal  $p$ -values, green: genomic controlled)**

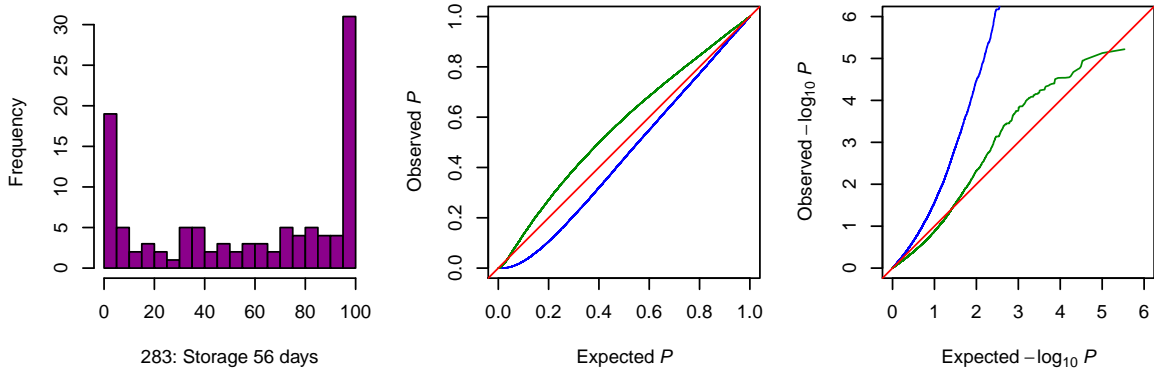

**Brown-Forsythe (colored, behind) & Wilcoxon (yellow, in front) results, genomic controlled**

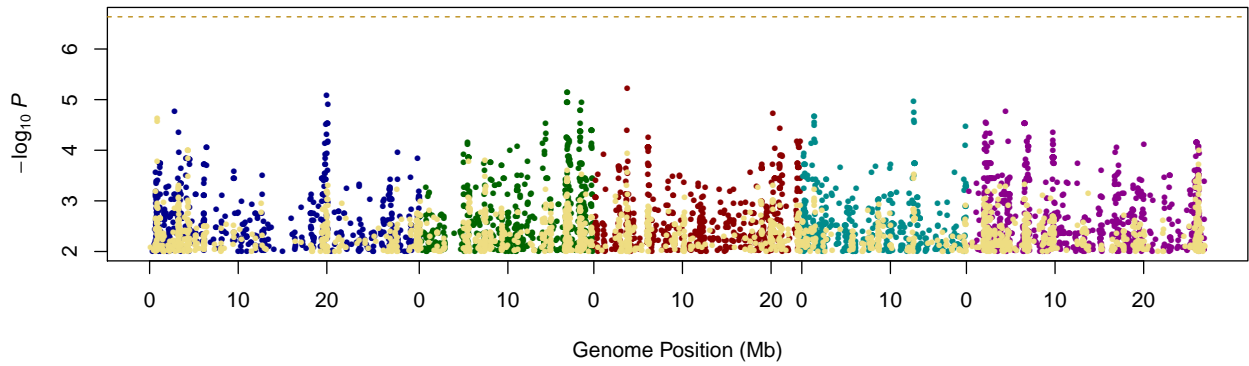

**Comparison of Brown-Forsythe & Wilcoxon  $p$ -values (MAF: minor allele frequency)**

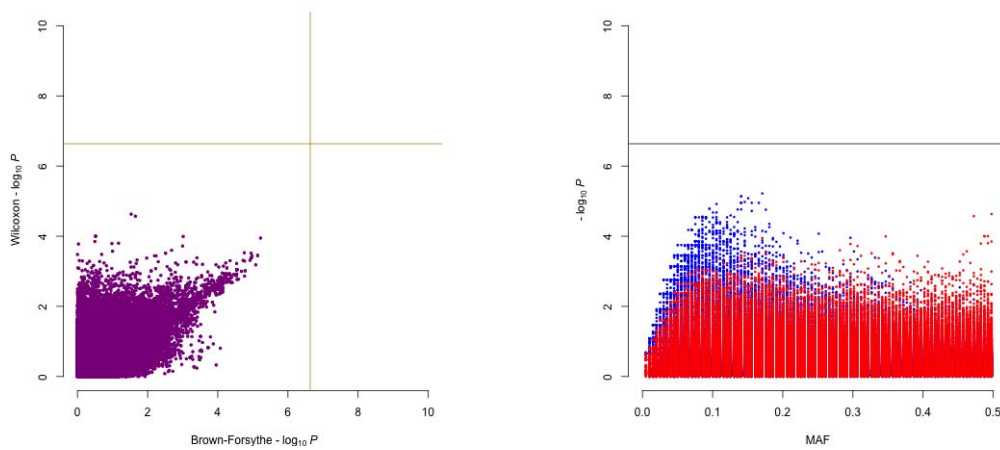

**Supplementary Figure B83 - Summary of vGWA results for 283: Storage 56 days**

**Supplementary Table 1 - GWA (M) and vGWA (V) scores and ranks of trait 1: LD**

| Gene        | Gene ID   | Chr | Rank (M) | Score (M) | Test (M) | Rank (V) | Score (V) | Test (V)       |
|-------------|-----------|-----|----------|-----------|----------|----------|-----------|----------------|
| ETC3        | AT4G01060 | 4   | 2        | 11.7406   | Wilcoxon | 1208     | 6.8571    | Brown-Forsythe |
| SVP         | AT2G22540 | 2   | 3        | 11.298    | Wilcoxon | 5        | 17.96364  | Brown-Forsythe |
| ATARP4      | AT1G18450 | 1   | 5        | 10.4959   | Wilcoxon | 3606     | 4.93442   | Brown-Forsythe |
| DFL2        | AT4G03400 | 4   | 8        | 10.0205   | Wilcoxon | 8        | 16.88891  | Brown-Forsythe |
| ATH1        | AT4G32980 | 4   | 13       | 9.95211   | Wilcoxon | 1246     | 6.77968   | Brown-Forsythe |
| AGL17       | AT2G22630 | 2   | 15       | 9.84147   | Wilcoxon | 817      | 7.62161   | Brown-Forsythe |
| PAT1        | AT5G48150 | 5   | 30       | 9.35821   | Wilcoxon | 852      | 7.56549   | Brown-Forsythe |
| DOG1        | AT5G45830 | 5   | 47       | 8.90731   | Wilcoxon | 48       | 14.00288  | Brown-Forsythe |
| sim-to-VRN1 | AT4G33280 | 4   | 52       | 8.90358   | Wilcoxon | 215      | 10.50571  | Brown-Forsythe |
| ATGA2OX7    | AT1G50960 | 1   | 105      | 8.3998    | Wilcoxon | 619      | 8.23201   | Brown-Forsythe |
| SVP         | AT2G22540 | 2   | 1        | 8.57121   | EMMA     | 5        | 17.96364  | Brown-Forsythe |
| FLC         | AT5G10140 | 5   | 2        | 6.24143   | EMMA     | 1220     | 6.83578   | Brown-Forsythe |
| AGL17       | AT2G22630 | 2   | 4        | 6.12352   | EMMA     | 817      | 7.62161   | Brown-Forsythe |
| GI          | AT1G22770 | 1   | 10       | 5.54344   | EMMA     | 1999     | 5.90781   | Brown-Forsythe |
| ETC3        | AT4G01060 | 4   | 11       | 5.47408   | EMMA     | 1208     | 6.8571    | Brown-Forsythe |
| SPA4        | AT1G53090 | 1   | 17       | 5.30428   | EMMA     | 717      | 7.9423    | Brown-Forsythe |
| SPL4        | AT1G53160 | 1   | 17       | 5.30428   | EMMA     | 717      | 7.9423    | Brown-Forsythe |
| PAT1        | AT5G48150 | 5   | 21       | 5.09294   | EMMA     | 852      | 7.56549   | Brown-Forsythe |
| AT2G30810   | AT2G30810 | 2   | 24       | 4.88787   | EMMA     | 752      | 7.83378   | Brown-Forsythe |
| GA1         | AT4G02780 | 4   | 37       | 4.6557    | EMMA     | 635      | 8.18414   | Brown-Forsythe |

**Supplementary Table 2 - GWA (M) and vGWA (V) scores and ranks of trait 2: LDV**

| Gene                                                                 | Gene ID | Chr | Rank (M) | Score (M) | Test (M) | Rank (V) | Score (V) |
|----------------------------------------------------------------------|---------|-----|----------|-----------|----------|----------|-----------|
| No candidate gene suggested in Atwell et al. (2010), <i>Nature</i> . |         |     |          |           |          |          |           |

**Supplementary Table 3 - GWA (M) and vGWA (V) scores and ranks of trait 3: SD**

| Gene        | Gene ID   | Chr | Rank (M) | Score (M) | Test (M) | Rank (V) | Score (V) | Test (V)       |
|-------------|-----------|-----|----------|-----------|----------|----------|-----------|----------------|
| ATGA2OX7    | AT1G50960 | 1   | 6        | 10.8001   | Wilcoxon | 249      | 7.36712   | Brown-Forsythe |
| sim-to-VRN1 | AT4G33280 | 4   | 9        | 10.7614   | Wilcoxon | 837      | 5.82012   | Brown-Forsythe |
| ATH1        | AT4G32980 | 4   | 17       | 10.1598   | Wilcoxon | 885      | 5.77272   | Brown-Forsythe |
| DOG1        | AT5G45830 | 5   | 23       | 9.38477   | Wilcoxon | 2        | 17.93296  | Brown-Forsythe |
| RAV1        | AT1G13260 | 1   | 44       | 8.96423   | Wilcoxon | 165      | 7.99892   | Brown-Forsythe |
| DFL2        | AT4G03400 | 4   | 53       | 8.84692   | Wilcoxon | 877      | 5.77889   | Brown-Forsythe |
| PAT1        | AT5G48150 | 5   | 108      | 8.15704   | Wilcoxon | 58       | 9.45668   | Brown-Forsythe |
| ATARP4      | AT1G18450 | 1   | 115      | 8.02712   | Wilcoxon | 608      | 6.21521   | Brown-Forsythe |
| SPA2        | AT4G11110 | 4   | 133      | 7.88967   | Wilcoxon | 1123     | 5.53711   | Brown-Forsythe |
| DDF1        | AT1G12610 | 1   | 138      | 7.83315   | Wilcoxon | 19       | 10.93332  | Brown-Forsythe |
| ETC3        | AT4G01060 | 4   | 3        | 5.7025    | EMMA     | 310      | 7.10878   | Brown-Forsythe |
| HEN2        | AT2G06990 | 2   | 4        | 5.13541   | EMMA     | 8        | 12.36783  | Brown-Forsythe |
| ATGA2OX7    | AT1G50960 | 1   | 5        | 5.12315   | EMMA     | 249      | 7.36712   | Brown-Forsythe |
| SVP         | AT2G22540 | 2   | 17       | 4.6684    | EMMA     | 52       | 9.68714   | Brown-Forsythe |
| DOG1        | AT5G45830 | 5   | 20       | 4.53821   | EMMA     | 2        | 17.93296  | Brown-Forsythe |
| PAT1        | AT5G48150 | 5   | 30       | 4.25684   | EMMA     | 58       | 9.45668   | Brown-Forsythe |
| ATH1        | AT4G32980 | 4   | 34       | 4.19098   | EMMA     | 885      | 5.77272   | Brown-Forsythe |
| SPA2        | AT4G11110 | 4   | 51       | 4.06349   | EMMA     | 1123     | 5.53711   | Brown-Forsythe |
| sim-to-VRN1 | AT4G33280 | 4   | 61       | 4.00216   | EMMA     | 837      | 5.82012   | Brown-Forsythe |
| LKP2        | AT2G18915 | 2   | 84       | 3.85566   | EMMA     | 1493     | 5.20564   | Brown-Forsythe |

**Supplementary Table 4 - GWA (M) and vGWA (V) scores and ranks of trait 4: SDV**

| Gene          | Gene ID   | Chr | Rank (M) | Score (M) | Test (M) | Rank (V) | Score (V) | Test (V)       |
|---------------|-----------|-----|----------|-----------|----------|----------|-----------|----------------|
| ATGA2OX7      | AT1G50960 | 1   | 4        | 9.15154   | Wilcoxon | 187      | 5.24066   | Brown-Forsythe |
| sim-to-VRN1   | AT4G33280 | 4   | 17       | 8.32555   | Wilcoxon | 3676     | 2.65252   | Brown-Forsythe |
| DOG1          | AT5G45830 | 5   | 43       | 7.88579   | Wilcoxon | 40       | 6.52089   | Brown-Forsythe |
| DFL2          | AT4G03400 | 4   | 44       | 7.87713   | Wilcoxon | 111      | 5.72668   | Brown-Forsythe |
| ATH1          | AT4G32980 | 4   | 59       | 7.59222   | Wilcoxon | 1855     | 3.20412   | Brown-Forsythe |
| FD            | AT4G35900 | 4   | 93       | 7.21393   | Wilcoxon | 1326     | 3.46732   | Brown-Forsythe |
| DDF1          | AT1G12610 | 1   | 105      | 7.11653   | Wilcoxon | 2841     | 2.8674    | Brown-Forsythe |
| HOS1          | AT2G39810 | 2   | 107      | 7.10616   | Wilcoxon | 6690     | 2.1969    | Brown-Forsythe |
| SPA2          | AT4G11110 | 4   | 122      | 6.9728    | Wilcoxon | 3197     | 2.76528   | Brown-Forsythe |
| RAV1          | AT1G13260 | 1   | 149      | 6.81923   | Wilcoxon | 1429     | 3.39975   | Brown-Forsythe |
| ICU2          | AT5G67100 | 5   | 5        | 6.87858   | EMMA     | 185      | 5.2498    | Brown-Forsythe |
| AT3G10185     | AT3G10185 | 3   | 84       | 4.21087   | EMMA     | 1266     | 3.5054    | Brown-Forsythe |
| AGL15         | AT5G13790 | 5   | 102      | 4.0192    | EMMA     | 1063     | 3.65279   | Brown-Forsythe |
| AGL20         | AT2G45660 | 2   | 117      | 3.91362   | EMMA     | 1980     | 3.15135   | Brown-Forsythe |
| AGL6          | AT2G45650 | 2   | 117      | 3.91362   | EMMA     | 1980     | 3.15135   | Brown-Forsythe |
| ELF6          | AT5G04240 | 5   | 120      | 3.89624   | EMMA     | 1231     | 3.52576   | Brown-Forsythe |
| ATGID1B/GID1B | AT3G63010 | 3   | 121      | 3.89149   | EMMA     | 2166     | 3.08735   | Brown-Forsythe |
| VIN3          | AT5G57380 | 5   | 143      | 3.80016   | EMMA     | 28       | 6.89848   | Brown-Forsythe |
| ZTL           | AT5G57360 | 5   | 143      | 3.80016   | EMMA     | 28       | 6.89848   | Brown-Forsythe |
| AGL19         | AT4G22950 | 4   | 153      | 3.75152   | EMMA     | 5344     | 2.36615   | Brown-Forsythe |

**Supplementary Table 5 - GWA (M) and vGWA (V) scores and ranks of trait 5: FT10**

| Gene        | Gene ID   | Chr | Rank (M) | Score (M) | Test (M) | Rank (V) | Score (V) | Test (V)       |
|-------------|-----------|-----|----------|-----------|----------|----------|-----------|----------------|
| ATH1        | AT4G32980 | 4   | 1        | 11.3864   | Wilcoxon | 1143     | 5.03736   | Brown-Forsythe |
| SVP         | AT2G22540 | 2   | 2        | 11.3786   | Wilcoxon | 518      | 5.84446   | Brown-Forsythe |
| AGL17       | AT2G22630 | 2   | 5        | 10.8544   | Wilcoxon | 518      | 5.84446   | Brown-Forsythe |
| sim-to-VRN1 | AT4G33280 | 4   | 25       | 9.92236   | Wilcoxon | 428      | 6.07322   | Brown-Forsythe |
| FES1        | AT2G33835 | 2   | 36       | 9.7753    | Wilcoxon | 121      | 7.33393   | Brown-Forsythe |
| SPL3        | AT2G33810 | 2   | 36       | 9.7753    | Wilcoxon | 2430     | 4.29587   | Brown-Forsythe |
| DOG1        | AT5G45830 | 5   | 40       | 9.62578   | Wilcoxon | 49       | 8.46759   | Brown-Forsythe |
| DFL2        | AT4G03400 | 4   | 58       | 9.19259   | Wilcoxon | 142      | 7.16822   | Brown-Forsythe |
| GASA5       | AT3G02885 | 3   | 59       | 9.17769   | Wilcoxon | 138      | 7.18925   | Brown-Forsythe |
| ATARP4      | AT1G18450 | 1   | 76       | 8.92443   | Wilcoxon | 1577     | 4.72381   | Brown-Forsythe |
| FLC         | AT5G10140 | 5   | 4        | 5.83594   | EMMA     | 623      | 5.64974   | Brown-Forsythe |
| sim-to-ESD4 | AT4G00690 | 4   | 21       | 5.14093   | EMMA     | 140      | 7.17166   | Brown-Forsythe |
| FRI         | AT4G00650 | 4   | 21       | 5.14093   | EMMA     | 348      | 6.29783   | Brown-Forsythe |
| DOG1        | AT5G45830 | 5   | 30       | 4.73222   | EMMA     | 49       | 8.46759   | Brown-Forsythe |
| FT          | AT1G65480 | 1   | 32       | 4.65948   | EMMA     | 3437     | 3.95529   | Brown-Forsythe |
| BAS1        | AT2G26710 | 2   | 52       | 4.10145   | EMMA     | 25513    | 2.00598   | Brown-Forsythe |
| NUA         | AT1G79280 | 1   | 53       | 4.09725   | EMMA     | 2793     | 4.15388   | Brown-Forsythe |
| SVP         | AT2G22540 | 2   | 61       | 3.98117   | EMMA     | 518      | 5.84446   | Brown-Forsythe |
| LD          | AT4G02560 | 4   | 80       | 3.83659   | EMMA     | 2570     | 4.24839   | Brown-Forsythe |
| CRP         | AT4G00450 | 4   | 135      | 3.42989   | EMMA     | 167      | 6.99894   | Brown-Forsythe |

**Supplementary Table 6 - GWA (M) and vGWA (V) scores and ranks of trait 6: FT16**

| Gene        | Gene ID   | Chr | Rank (M) | Score (M) | Test (M) | Rank (V) | Score (V) | Test (V)       |
|-------------|-----------|-----|----------|-----------|----------|----------|-----------|----------------|
| ETC3        | AT4G01060 | 4   | 2        | 11.69     | Wilcoxon | 378      | 11.1057   | Brown-Forsythe |
| AGL17       | AT2G22630 | 2   | 4        | 11.4261   | Wilcoxon | 3        | 20.57433  | Brown-Forsythe |
| ATH1        | AT4G32980 | 4   | 5        | 11.3772   | Wilcoxon | 1233     | 8.83944   | Brown-Forsythe |
| ATARP4      | AT1G18450 | 1   | 7        | 11.0602   | Wilcoxon | 111      | 13.92466  | Brown-Forsythe |
| SVP         | AT2G22540 | 2   | 8        | 11.0553   | Wilcoxon | 3        | 20.57433  | Brown-Forsythe |
| sim-to-VRN1 | AT4G33280 | 4   | 10       | 11.0289   | Wilcoxon | 944      | 9.36459   | Brown-Forsythe |
| DFL2        | AT4G03400 | 4   | 20       | 10.7701   | Wilcoxon | 129      | 13.57847  | Brown-Forsythe |
| FPF1        | AT5G24860 | 5   | 54       | 10.1493   | Wilcoxon | 368      | 11.20233  | Brown-Forsythe |
| FLC         | AT5G10140 | 5   | 71       | 10.0034   | Wilcoxon | 325      | 11.43774  | Brown-Forsythe |
| GASA5       | AT3G02885 | 3   | 147      | 9.16419   | Wilcoxon | 1435     | 8.51077   | Brown-Forsythe |
| FLC         | AT5G10140 | 5   | 1        | 6.76866   | EMMA     | 325      | 11.43774  | Brown-Forsythe |
| sim-to-EDS4 | AT4G00690 | 4   | 6        | 5.15681   | EMMA     | 450      | 10.73309  | Brown-Forsythe |
| FRI         | AT4G00650 | 4   | 6        | 5.15681   | EMMA     | 2303     | 7.53779   | Brown-Forsythe |
| DOG1        | AT5G45830 | 5   | 20       | 4.5821    | EMMA     | 1926     | 7.93548   | Brown-Forsythe |
| FT          | AT1G65480 | 1   | 54       | 4.33335   | EMMA     | 4848     | 5.8215    | Brown-Forsythe |
| CRP         | AT4G00450 | 4   | 59       | 4.25287   | EMMA     | 3106     | 6.83924   | Brown-Forsythe |
| ATARP4      | AT1G18450 | 1   | 68       | 4.205     | EMMA     | 111      | 13.92466  | Brown-Forsythe |
| LD          | AT4G02560 | 4   | 82       | 4.02845   | EMMA     | 827      | 9.60077   | Brown-Forsythe |
| BAS1        | AT2G26710 | 2   | 85       | 4.02267   | EMMA     | 25167    | 2.63759   | Brown-Forsythe |
| AGL17       | AT2G22630 | 2   | 87       | 4.01148   | EMMA     | 3        | 20.57433  | Brown-Forsythe |

**Supplementary Table 7 - GWA (M) and vGWA (V) scores and ranks of trait 7: FT22**

| Gene        | Gene ID   | Chr | Rank (M) | Score (M) | Test (M) | Rank (V) | Score (V) | Test (V)       |
|-------------|-----------|-----|----------|-----------|----------|----------|-----------|----------------|
| ATARP4      | AT1G18450 | 1   | 4        | 11.6112   | Wilcoxon | 231      | 11.99001  | Brown-Forsythe |
| DFL2        | AT4G03400 | 4   | 16       | 10.824    | Wilcoxon | 197      | 12.31583  | Brown-Forsythe |
| AGL17       | AT2G22630 | 2   | 19       | 10.6444   | Wilcoxon | 10       | 19.636    | Brown-Forsythe |
| SVP         | AT2G22540 | 2   | 43       | 9.88639   | Wilcoxon | 10       | 19.636    | Brown-Forsythe |
| ATH1        | AT4G32980 | 4   | 52       | 9.74982   | Wilcoxon | 1295     | 8.06517   | Brown-Forsythe |
| sim-to-VRN1 | AT4G33280 | 4   | 97       | 9.14786   | Wilcoxon | 813      | 9.24459   | Brown-Forsythe |
| ATGA2OX7    | AT1G50960 | 1   | 103      | 9.14404   | Wilcoxon | 2395     | 6.71931   | Brown-Forsythe |
| RAV1        | AT1G13260 | 1   | 138      | 8.93617   | Wilcoxon | 705      | 9.46755   | Brown-Forsythe |
| ETC3        | AT4G01060 | 4   | 139      | 8.90838   | Wilcoxon | 809      | 9.253     | Brown-Forsythe |
| FLC         | AT5G10140 | 5   | 153      | 8.79855   | Wilcoxon | 98       | 14.04109  | Brown-Forsythe |
| FLC         | AT5G10140 | 5   | 1        | 7.35652   | EMMA     | 98       | 14.04109  | Brown-Forsythe |
| sim-to-ESD4 | AT4G00690 | 4   | 21       | 6.02586   | EMMA     | 967      | 8.7682    | Brown-Forsythe |
| FRI         | AT4G00650 | 4   | 21       | 6.02586   | EMMA     | 2165     | 6.94445   | Brown-Forsythe |
| DOG1        | AT5G45830 | 5   | 39       | 4.95198   | EMMA     | 651      | 9.64474   | Brown-Forsythe |
| CDF1        | AT5G62430 | 5   | 80       | 4.31728   | EMMA     | 6141     | 4.85826   | Brown-Forsythe |
| ATARP4      | AT1G18450 | 1   | 98       | 4.18876   | EMMA     | 231      | 11.99001  | Brown-Forsythe |
| CRP         | AT4G00450 | 4   | 180      | 3.62105   | EMMA     | 3976     | 5.68902   | Brown-Forsythe |
| SPA4        | AT1G53090 | 1   | 188      | 3.58201   | EMMA     | 749      | 9.39523   | Brown-Forsythe |
| SPL4        | AT1G53160 | 1   | 188      | 3.58201   | EMMA     | 1515     | 7.69001   | Brown-Forsythe |
| RGA1        | AT2G01570 | 2   | 199      | 3.54707   | EMMA     | 2248     | 6.85811   | Brown-Forsythe |

**Supplementary Table 8 - GWA (M) and vGWA (V) scores and ranks of trait 8: Seed Dormancy**

| Gene    | Gene ID   | Chr | Rank (M) | Score (M) | Test (M) | Rank (V) | Score (V) | Test (V)       |
|---------|-----------|-----|----------|-----------|----------|----------|-----------|----------------|
| ATMYB65 | AT3G11440 | 3   | 7        | 5.84953   | Wilcoxon | 1258     | 3.1394    | Brown-Forsythe |
| ATCUL1  | AT4G02570 | 4   | 12       | 5.65225   | Wilcoxon | 922      | 3.3557    | Brown-Forsythe |
| LD      | AT4G02560 | 4   | 12       | 5.65225   | Wilcoxon | 922      | 3.3557    | Brown-Forsythe |
| CYCD4;1 | AT5G65420 | 5   | 18       | 5.58598   | Wilcoxon | 1877     | 2.84571   | Brown-Forsythe |
| AGL15   | AT5G13790 | 5   | 19       | 5.54763   | Wilcoxon | 3047     | 2.50943   | Brown-Forsythe |
| SPA4    | AT1G53090 | 1   | 27       | 5.35615   | Wilcoxon | 1132     | 3.20495   | Brown-Forsythe |
| PIL5    | AT2G20180 | 2   | 34       | 5.2128    | Wilcoxon | 3483     | 2.42171   | Brown-Forsythe |
| WER1    | AT5G14750 | 5   | 73       | 4.92847   | Wilcoxon | 1128     | 3.2085    | Brown-Forsythe |
| HBT     | AT2G20000 | 2   | 99       | 4.79737   | Wilcoxon | 4090     | 2.32518   | Brown-Forsythe |
| SDP1    | AT5G04040 | 5   | 106      | 4.7611    | Wilcoxon | 693      | 3.57518   | Brown-Forsythe |
| BME3    | AT3G54810 | 3   | 3        | 5.58007   | EMMA     | 498      | 3.80075   | Brown-Forsythe |
| PSD     | AT1G72560 | 1   | 19       | 5.16262   | EMMA     | 3141     | 2.48768   | Brown-Forsythe |
| FRS2    | AT2G32250 | 2   | 23       | 5.02769   | EMMA     | 3716     | 2.38276   | Brown-Forsythe |
| PIL6    | AT3G59060 | 3   | 29       | 4.68931   | EMMA     | 327      | 4.15792   | Brown-Forsythe |
| TT12    | AT3G59030 | 3   | 29       | 4.68931   | EMMA     | 327      | 4.15792   | Brown-Forsythe |
| PIN8    | AT5G15100 | 5   | 30       | 4.6591    | EMMA     | 971      | 3.30759   | Brown-Forsythe |
| HOS1    | AT2G39810 | 2   | 35       | 4.4622    | EMMA     | 322      | 4.1704    | Brown-Forsythe |
| HUA2    | AT5G23150 | 5   | 39       | 4.41261   | EMMA     | 138      | 4.79807   | Brown-Forsythe |
| SMZ     | AT3G54990 | 3   | 54       | 4.23509   | EMMA     | 248      | 4.33995   | Brown-Forsythe |
| OLEO1   | AT4G25140 | 4   | 56       | 4.21585   | EMMA     | 1821     | 2.86409   | Brown-Forsythe |

**Supplementary Table 9** - GWA (M) and vGWA (V) scores and ranks of trait 14: Li7

| Gene                                                                 | Gene ID | Chr | Rank (M) | Score (M) | Test (M) | Rank (V) | Score (V) |
|----------------------------------------------------------------------|---------|-----|----------|-----------|----------|----------|-----------|
| No candidate gene suggested in Atwell et al. (2010), <i>Nature</i> . |         |     |          |           |          |          |           |

**Supplementary Table 10** - GWA (M) and vGWA (V) scores and ranks of trait 15: B11

| Gene                                                                 | Gene ID | Chr | Rank (M) | Score (M) | Test (M) | Rank (V) | Score (V) |
|----------------------------------------------------------------------|---------|-----|----------|-----------|----------|----------|-----------|
| No candidate gene suggested in Atwell et al. (2010), <i>Nature</i> . |         |     |          |           |          |          |           |

**Supplementary Table 11** - GWA (M) and vGWA (V) scores and ranks of trait 16: Na23

| Gene | Gene ID   | Chr | Rank (M) | Score (M) | Test (M) | Rank (V) | Score (V) | Test (V)       |
|------|-----------|-----|----------|-----------|----------|----------|-----------|----------------|
| HKT1 | AT4G10310 | 4   | 1        | 6.24769   | Wilcoxon | 6        | 6.15284   | Brown-Forsythe |
| HKT1 | AT4G10310 | 4   | 1        | 8.3708    | EMMA     | 6        | 6.15284   | Brown-Forsythe |

**Supplementary Table 12** - GWA (M) and vGWA (V) scores and ranks of trait 17: Mg25

| Gene                                                                 | Gene ID | Chr | Rank (M) | Score (M) | Test (M) | Rank (V) | Score (V) |
|----------------------------------------------------------------------|---------|-----|----------|-----------|----------|----------|-----------|
| No candidate gene suggested in Atwell et al. (2010), <i>Nature</i> . |         |     |          |           |          |          |           |

**Supplementary Table 13** - GWA (M) and vGWA (V) scores and ranks of trait 18: P31

| Gene                                                                 | Gene ID | Chr | Rank (M) | Score (M) | Test (M) | Rank (V) | Score (V) |
|----------------------------------------------------------------------|---------|-----|----------|-----------|----------|----------|-----------|
| No candidate gene suggested in Atwell et al. (2010), <i>Nature</i> . |         |     |          |           |          |          |           |

**Supplementary Table 14** - GWA (M) and vGWA (V) scores and ranks of trait 19: S34

| Gene     | Gene ID   | Chr | Rank (M) | Score (M) | Test (M) | Rank (V) | Score (V) | Test (V)       |
|----------|-----------|-----|----------|-----------|----------|----------|-----------|----------------|
| SULTR1;1 | AT4G08620 | 4   | 44       | 3.69288   | Wilcoxon | 1569     | 1.95634   | Brown-Forsythe |
| SULTR1;2 | AT1G78000 | 1   | 140      | 3.17072   | Wilcoxon | 1107     | 2.0791    | Brown-Forsythe |
| SULTR1;2 | AT1G78000 | 1   | 157      | 3.33987   | EMMA     | 1107     | 2.0791    | Brown-Forsythe |



**Supplementary Table 15** - GWA (M) and vGWA (V) scores and ranks of trait 20: K39

| Gene                                                                 | Gene ID | Chr | Rank (M) | Score (M) | Test (M) | Rank (V) | Score (V) |
|----------------------------------------------------------------------|---------|-----|----------|-----------|----------|----------|-----------|
| No candidate gene suggested in Atwell et al. (2010), <i>Nature</i> . |         |     |          |           |          |          |           |

**Supplementary Table 16** - GWA (M) and vGWA (V) scores and ranks of trait 21: Ca43

| Gene                                                                 | Gene ID | Chr | Rank (M) | Score (M) | Test (M) | Rank (V) | Score (V) |
|----------------------------------------------------------------------|---------|-----|----------|-----------|----------|----------|-----------|
| No candidate gene suggested in Atwell et al. (2010), <i>Nature</i> . |         |     |          |           |          |          |           |

**Supplementary Table 17** - GWA (M) and vGWA (V) scores and ranks of trait 22: Mn55

| Gene                                                                 | Gene ID | Chr | Rank (M) | Score (M) | Test (M) | Rank (V) | Score (V) |
|----------------------------------------------------------------------|---------|-----|----------|-----------|----------|----------|-----------|
| No candidate gene suggested in Atwell et al. (2010), <i>Nature</i> . |         |     |          |           |          |          |           |

**Supplementary Table 18** - GWA (M) and vGWA (V) scores and ranks of trait 23: Fe56

| Gene                                                                 | Gene ID | Chr | Rank (M) | Score (M) | Test (M) | Rank (V) | Score (V) |
|----------------------------------------------------------------------|---------|-----|----------|-----------|----------|----------|-----------|
| No candidate gene suggested in Atwell et al. (2010), <i>Nature</i> . |         |     |          |           |          |          |           |

**Supplementary Table 19** - GWA (M) and vGWA (V) scores and ranks of trait 24: Co59

| Gene                                                                 | Gene ID | Chr | Rank (M) | Score (M) | Test (M) | Rank (V) | Score (V) |
|----------------------------------------------------------------------|---------|-----|----------|-----------|----------|----------|-----------|
| No candidate gene suggested in Atwell et al. (2010), <i>Nature</i> . |         |     |          |           |          |          |           |

**Supplementary Table 20** - GWA (M) and vGWA (V) scores and ranks of trait 25: Ni60

| Gene                                                                 | Gene ID | Chr | Rank (M) | Score (M) | Test (M) | Rank (V) | Score (V) |
|----------------------------------------------------------------------|---------|-----|----------|-----------|----------|----------|-----------|
| No candidate gene suggested in Atwell et al. (2010), <i>Nature</i> . |         |     |          |           |          |          |           |

**Supplementary Table 21** - GWA (M) and vGWA (V) scores and ranks of trait 26: Cu65

| Gene                                                                 | Gene ID | Chr | Rank (M) | Score (M) | Test (M) | Rank (V) | Score (V) |
|----------------------------------------------------------------------|---------|-----|----------|-----------|----------|----------|-----------|
| No candidate gene suggested in Atwell et al. (2010), <i>Nature</i> . |         |     |          |           |          |          |           |

**Supplementary Table 22** - GWA (M) and vGWA (V) scores and ranks of trait 27: Zn66

| Gene                                                                 | Gene ID | Chr | Rank (M) | Score (M) | Test (M) | Rank (V) | Score (V) |
|----------------------------------------------------------------------|---------|-----|----------|-----------|----------|----------|-----------|
| No candidate gene suggested in Atwell et al. (2010), <i>Nature</i> . |         |     |          |           |          |          |           |

**Supplementary Table 23** - GWA (M) and vGWA (V) scores and ranks of trait 28: As75

| Gene                                                                 | Gene ID | Chr | Rank (M) | Score (M) | Test (M) | Rank (V) | Score (V) |
|----------------------------------------------------------------------|---------|-----|----------|-----------|----------|----------|-----------|
| No candidate gene suggested in Atwell et al. (2010), <i>Nature</i> . |         |     |          |           |          |          |           |

**Supplementary Table 24** - GWA (M) and vGWA (V) scores and ranks of trait 29: Se82

| Gene     | Gene ID   | Chr | Rank (M) | Score (M) | Test (M) | Rank (V) | Score (V) | Test (V)       |
|----------|-----------|-----|----------|-----------|----------|----------|-----------|----------------|
| SULTR3;4 | AT3G15990 | 3   | 74       | 3.6625    | Wilcoxon | 2665     | 1.74448   | Brown-Forsythe |
| SULTR1;2 | AT1G78000 | 1   | 154      | 3.15122   | EMMA     | 1113     | 2.13141   | Brown-Forsythe |

**Supplementary Table 25** - GWA (M) and vGWA (V) scores and ranks of trait 30: Mo98

| Gene | Gene ID   | Chr | Rank (M) | Score (M) | Test (M) | Rank (V) | Score (V) | Test (V)       |
|------|-----------|-----|----------|-----------|----------|----------|-----------|----------------|
| MOT1 | AT2G25680 | 2   | 31       | 4.3145    | Wilcoxon | 1        | 9.23419   | Brown-Forsythe |

**Supplementary Table 26** - GWA (M) and vGWA (V) scores and ranks of trait 31: Cd114

| Gene | Gene ID   | Chr | Rank (M) | Score (M) | Test (M) | Rank (V) | Score (V) | Test (V)       |
|------|-----------|-----|----------|-----------|----------|----------|-----------|----------------|
| HMA3 | AT4G30120 | 4   | 13       | 4.86761   | Wilcoxon | 59       | 3.45119   | Brown-Forsythe |
| HMA2 | AT4G30110 | 4   | 17       | 4.77198   | Wilcoxon | 59       | 3.45119   | Brown-Forsythe |
| HMA3 | AT4G30120 | 4   | 131      | 3.29429   | EMMA     | 59       | 3.45119   | Brown-Forsythe |
| HMA2 | AT4G30110 | 4   | 131      | 3.29429   | EMMA     | 59       | 3.45119   | Brown-Forsythe |

**Supplementary Table 27** - GWA (M) and vGWA (V) scores and ranks of trait 39: 0W

| Gene        | Gene ID   | Chr | Rank (M) | Score (M) | Test (M) | Rank (V) | Score (V) | Test (V)       |
|-------------|-----------|-----|----------|-----------|----------|----------|-----------|----------------|
| DOG1        | AT5G45830 | 5   | 5        | 8.64406   | Wilcoxon | 20       | 9.37409   | Brown-Forsythe |
| AGL17       | AT2G22630 | 2   | 11       | 7.63685   | Wilcoxon | 618      | 5.18233   | Brown-Forsythe |
| SVP         | AT2G22540 | 2   | 11       | 7.63685   | Wilcoxon | 657      | 5.1129    | Brown-Forsythe |
| ATARP4      | AT1G18450 | 1   | 16       | 7.42352   | Wilcoxon | 753      | 4.98139   | Brown-Forsythe |
| ETC3        | AT4G01060 | 4   | 30       | 7.00318   | Wilcoxon | 732      | 5.00204   | Brown-Forsythe |
| GA1         | AT4G02780 | 4   | 34       | 6.85811   | Wilcoxon | 21       | 9.29584   | Brown-Forsythe |
| ATGA2OX7    | AT1G50960 | 1   | 46       | 6.6054    | Wilcoxon | 2199     | 3.97899   | Brown-Forsythe |
| DFL2        | AT4G03400 | 4   | 51       | 6.5377    | Wilcoxon | 16       | 9.92376   | Brown-Forsythe |
| PAT1        | AT5G48150 | 5   | 63       | 6.38646   | Wilcoxon | 1672     | 4.25584   | Brown-Forsythe |
| RAV1        | AT1G13260 | 1   | 91       | 6.13445   | Wilcoxon | 8        | 10.4829   | Brown-Forsythe |
| DOG1        | AT5G45830 | 5   | 5        | 5.51136   | EMMA     | 20       | 9.37409   | Brown-Forsythe |
| ETC3        | AT4G01060 | 4   | 23       | 4.50434   | EMMA     | 732      | 5.00204   | Brown-Forsythe |
| GA1         | AT4G02780 | 4   | 26       | 4.46126   | EMMA     | 21       | 9.29584   | Brown-Forsythe |
| ATARP4      | AT1G18450 | 1   | 27       | 4.42836   | EMMA     | 753      | 4.98139   | Brown-Forsythe |
| SVP         | AT2G22540 | 2   | 55       | 4.00266   | EMMA     | 657      | 5.1129    | Brown-Forsythe |
| LD          | AT4G02560 | 4   | 57       | 3.9937    | EMMA     | 3619     | 3.45828   | Brown-Forsythe |
| CRP         | AT4G00450 | 4   | 94       | 3.69007   | EMMA     | 1283     | 4.49229   | Brown-Forsythe |
| AGL17       | AT2G22630 | 2   | 108      | 3.60569   | EMMA     | 618      | 5.18233   | Brown-Forsythe |
| sim-to-EDS4 | AT4G00690 | 4   | 129      | 3.48307   | EMMA     | 842      | 4.87748   | Brown-Forsythe |
| FRI         | AT4G00650 | 4   | 129      | 3.48307   | EMMA     | 842      | 4.87748   | Brown-Forsythe |

**Supplementary Table 28** - GWA (M) and vGWA (V) scores and ranks of trait 40: 2W

| Gene       | Gene ID   | Chr | Rank (M) | Score (M) | Test (M) | Rank (V) | Score (V) | Test (V)       |
|------------|-----------|-----|----------|-----------|----------|----------|-----------|----------------|
| ETC3       | AT4G01060 | 4   | 3        | 6.08452   | Wilcoxon | 224      | 10.09748  | Brown-Forsythe |
| SVP        | AT2G22540 | 2   | 8        | 5.55105   | Wilcoxon | 7        | 18.27943  | Brown-Forsythe |
| ATARP4     | AT1G18450 | 1   | 18       | 5.1009    | Wilcoxon | 1036     | 7.17769   | Brown-Forsythe |
| FLC        | AT5G10140 | 5   | 21       | 5.037     | Wilcoxon | 43       | 13.13255  | Brown-Forsythe |
| ATGA2OX7   | AT1G50960 | 1   | 37       | 4.66299   | Wilcoxon | 298      | 9.53877   | Brown-Forsythe |
| PAT1       | AT5G48150 | 5   | 46       | 4.49465   | Wilcoxon | 6313     | 4.08418   | Brown-Forsythe |
| FHL        | AT5G02200 | 5   | 52       | 4.34154   | Wilcoxon | 292      | 9.58921   | Brown-Forsythe |
| DOG1       | AT5G45830 | 5   | 57       | 4.26302   | Wilcoxon | 117      | 11.42124  | Brown-Forsythe |
| sim-to-FCA | AT2G47310 | 2   | 85       | 4.01878   | Wilcoxon | 1455     | 6.53021   | Brown-Forsythe |
| AGL17      | AT2G22630 | 2   | 89       | 3.98623   | Wilcoxon | 7        | 18.27943  | Brown-Forsythe |
| ETC3       | AT4G01060 | 4   | 3        | 6.08452   | EMMA     | 224      | 10.09748  | Brown-Forsythe |
| SVP        | AT2G22540 | 2   | 8        | 5.55105   | EMMA     | 7        | 18.27943  | Brown-Forsythe |
| ATARP4     | AT1G18450 | 1   | 18       | 5.1009    | EMMA     | 1036     | 7.17769   | Brown-Forsythe |
| FLC        | AT5G10140 | 5   | 21       | 5.037     | EMMA     | 43       | 13.13255  | Brown-Forsythe |
| ATGA2OX7   | AT1G50960 | 1   | 37       | 4.66299   | EMMA     | 298      | 9.53877   | Brown-Forsythe |
| PAT1       | AT5G48150 | 5   | 45       | 4.49465   | EMMA     | 6313     | 4.08418   | Brown-Forsythe |
| FHL        | AT5G02200 | 5   | 50       | 4.34154   | EMMA     | 292      | 9.58921   | Brown-Forsythe |
| DOG1       | AT5G45830 | 5   | 54       | 4.26302   | EMMA     | 117      | 11.42124  | Brown-Forsythe |
| AGL17      | AT2G22630 | 2   | 83       | 3.98623   | EMMA     | 7        | 18.27943  | Brown-Forsythe |
| PIF4       | AT2G43010 | 2   | 114      | 3.73038   | EMMA     | 2390     | 5.6462    | Brown-Forsythe |

**Supplementary Table 29** - GWA (M) and vGWA (V) scores and ranks of trait 41: 4W

| Gene        | Gene ID   | Chr | Rank (M) | Score (M) | Test (M) | Rank (V) | Score (V) | Test (V)       |
|-------------|-----------|-----|----------|-----------|----------|----------|-----------|----------------|
| DOG1        | AT5G45830 | 5   | 18       | 8.10388   | Wilcoxon | 151      | 8.1055    | Brown-Forsythe |
| ATH1        | AT4G32980 | 4   | 21       | 7.99396   | Wilcoxon | 1174     | 5.12309   | Brown-Forsythe |
| ATARP4      | AT1G18450 | 1   | 33       | 7.89219   | Wilcoxon | 1723     | 4.64796   | Brown-Forsythe |
| sim-to-VRN1 | AT4G33280 | 4   | 52       | 7.59895   | Wilcoxon | 1009     | 5.3955    | Brown-Forsythe |
| DFL2        | AT4G03400 | 4   | 60       | 7.59393   | Wilcoxon | 39       | 9.90224   | Brown-Forsythe |
| SVP         | AT2G22540 | 2   | 98       | 7.20296   | Wilcoxon | 9        | 11.95759  | Brown-Forsythe |
| RAV1        | AT1G13260 | 1   | 100      | 7.19271   | Wilcoxon | 1016     | 5.38472   | Brown-Forsythe |
| ATGA2OX7    | AT1G50960 | 1   | 112      | 7.14885   | Wilcoxon | 1719     | 4.65136   | Brown-Forsythe |
| ELF4        | AT2G40080 | 2   | 136      | 7.04275   | Wilcoxon | 394      | 6.81857   | Brown-Forsythe |
| PAT1        | AT5G48150 | 5   | 139      | 7.00863   | Wilcoxon | 1876     | 4.55392   | Brown-Forsythe |
| SVP         | AT2G22540 | 2   | 1        | 7.83035   | EMMA     | 9        | 11.95759  | Brown-Forsythe |
| DOG1        | AT5G45830 | 5   | 5        | 5.89822   | EMMA     | 151      | 8.1055    | Brown-Forsythe |
| PAT1        | AT5G48150 | 5   | 8        | 5.66563   | EMMA     | 1876     | 4.55392   | Brown-Forsythe |
| ETC3        | AT4G01060 | 4   | 12       | 5.1676    | EMMA     | 11       | 11.72007  | Brown-Forsythe |
| AGL17       | AT2G22630 | 2   | 14       | 5.16114   | EMMA     | 9        | 11.95759  | Brown-Forsythe |
| PIL2        | AT3G62090 | 3   | 40       | 4.47289   | EMMA     | 309      | 7.20881   | Brown-Forsythe |
| ATARP4      | AT1G18450 | 1   | 41       | 4.47006   | EMMA     | 1723     | 4.64796   | Brown-Forsythe |
| VIN3        | AT5G57380 | 5   | 42       | 4.46738   | EMMA     | 4        | 13.46556  | Brown-Forsythe |
| ZTL         | AT5G57360 | 5   | 42       | 4.46738   | EMMA     | 4        | 13.46556  | Brown-Forsythe |
| DFL2        | AT4G03400 | 4   | 82       | 3.9455    | EMMA     | 39       | 9.90224   | Brown-Forsythe |

**Supplementary Table 30** - GWA (M) and vGWA (V) scores and ranks of trait 42: 8W

| Gene        | Gene ID   | Chr | Rank (M) | Score (M) | Test (M) | Rank (V) | Score (V) | Test (V)       |
|-------------|-----------|-----|----------|-----------|----------|----------|-----------|----------------|
| RAV1        | AT1G13260 | 1   | 1        | 10.3023   | Wilcoxon | 758      | 4.67703   | Brown-Forsythe |
| ATH1        | AT4G32980 | 4   | 7        | 9.20954   | Wilcoxon | 430      | 5.16467   | Brown-Forsythe |
| ATGA2OX7    | AT1G50960 | 1   | 10       | 9.09475   | Wilcoxon | 2315     | 3.73016   | Brown-Forsythe |
| DOG1        | AT5G45830 | 5   | 15       | 8.80655   | Wilcoxon | 242      | 5.61266   | Brown-Forsythe |
| CUL4        | AT5G46210 | 5   | 30       | 8.3178    | Wilcoxon | 3497     | 3.41771   | Brown-Forsythe |
| sim-to-VRN1 | AT4G33280 | 4   | 39       | 8.25028   | Wilcoxon | 4472     | 3.21927   | Brown-Forsythe |
| HEN2        | AT2G06990 | 2   | 48       | 8.18372   | Wilcoxon | 54       | 6.47746   | Brown-Forsythe |
| GASA5       | AT3G02885 | 3   | 67       | 7.95567   | Wilcoxon | 13       | 7.50691   | Brown-Forsythe |
| sim-to-FCA  | AT2G47310 | 2   | 84       | 7.66337   | Wilcoxon | 3638     | 3.38856   | Brown-Forsythe |
| FLC         | AT5G10140 | 5   | 107      | 7.55465   | Wilcoxon | 61       | 6.38903   | Brown-Forsythe |
| FLC         | AT5G10140 | 5   | 21       | 4.46966   | EMMA     | 61       | 6.38903   | Brown-Forsythe |
| ATH1        | AT4G32980 | 4   | 27       | 4.30108   | EMMA     | 430      | 5.16467   | Brown-Forsythe |
| TFL2        | AT5G17690 | 5   | 29       | 4.28395   | EMMA     | 158      | 5.91751   | Brown-Forsythe |
| CO          | AT5G15840 | 5   | 31       | 4.19141   | EMMA     | 160      | 5.91409   | Brown-Forsythe |
| COL1        | AT5G15850 | 5   | 31       | 4.19141   | EMMA     | 43       | 6.732     | Brown-Forsythe |
| PHYB        | AT2G18790 | 2   | 42       | 3.94036   | EMMA     | 505      | 5.04122   | Brown-Forsythe |
| HEN2        | AT2G06990 | 2   | 57       | 3.81037   | EMMA     | 54       | 6.47746   | Brown-Forsythe |
| RAV1        | AT1G13260 | 1   | 58       | 3.80001   | EMMA     | 758      | 4.67703   | Brown-Forsythe |
| sim-to-FCA  | AT2G47310 | 2   | 61       | 3.77858   | EMMA     | 3638     | 3.38856   | Brown-Forsythe |
| sim-to-VRN1 | AT4G33280 | 4   | 130      | 3.43423   | EMMA     | 4472     | 3.21927   | Brown-Forsythe |

**Supplementary Table 31 - GWA (M) and vGWA (V) scores and ranks of trait 43: FLC**

| Gene        | Gene ID   | Chr | Rank (M) | Score (M) | Test (M) | Rank (V) | Score (V) | Test (V)       |
|-------------|-----------|-----|----------|-----------|----------|----------|-----------|----------------|
| SVP         | AT2G22540 | 2   | 3        | 8.9246    | Wilcoxon | 3281     | 2.59967   | Brown-Forsythe |
| AGL17       | AT2G22630 | 2   | 5        | 8.59608   | Wilcoxon | 3281     | 2.59967   | Brown-Forsythe |
| SPA4        | AT1G53090 | 1   | 7        | 8.49959   | Wilcoxon | 33       | 5.17117   | Brown-Forsythe |
| SPL4        | AT1G53160 | 1   | 7        | 8.49959   | Wilcoxon | 33       | 5.17117   | Brown-Forsythe |
| ETC3        | AT4G01060 | 4   | 12       | 8.18367   | Wilcoxon | 983      | 3.27492   | Brown-Forsythe |
| DFL2        | AT4G03400 | 4   | 17       | 7.96135   | Wilcoxon | 541      | 3.60023   | Brown-Forsythe |
| DOG1        | AT5G45830 | 5   | 20       | 7.81214   | Wilcoxon | 11700    | 1.83836   | Brown-Forsythe |
| CRP         | AT4G00450 | 4   | 25       | 7.74903   | Wilcoxon | 152      | 4.28631   | Brown-Forsythe |
| EMF1        | AT5G11530 | 5   | 40       | 7.37903   | Wilcoxon | 446      | 3.71607   | Brown-Forsythe |
| sim-to-VRN1 | AT4G33280 | 4   | 47       | 7.24378   | Wilcoxon | 2524     | 2.74382   | Brown-Forsythe |
| ETC3        | AT4G01060 | 4   | 16       | 4.84345   | EMMA     | 983      | 3.27492   | Brown-Forsythe |
| SPA4        | AT1G53090 | 1   | 35       | 4.56274   | EMMA     | 33       | 5.17117   | Brown-Forsythe |
| SPL4        | AT1G53160 | 1   | 35       | 4.56274   | EMMA     | 33       | 5.17117   | Brown-Forsythe |
| CRP         | AT4G00450 | 4   | 39       | 4.49707   | EMMA     | 152      | 4.28631   | Brown-Forsythe |
| DFL2        | AT4G03400 | 4   | 41       | 4.42654   | EMMA     | 541      | 3.60023   | Brown-Forsythe |
| sim-to-EDS4 | AT4G00690 | 4   | 71       | 3.90626   | EMMA     | 249      | 4.01486   | Brown-Forsythe |
| FRI         | AT4G00650 | 4   | 71       | 3.90626   | EMMA     | 391      | 3.79432   | Brown-Forsythe |
| SVP         | AT2G22540 | 2   | 72       | 3.9053    | EMMA     | 3281     | 2.59967   | Brown-Forsythe |
| RGA1        | AT2G01570 | 2   | 101      | 3.62535   | EMMA     | 3297     | 2.59765   | Brown-Forsythe |
| DOG1        | AT5G45830 | 5   | 113      | 3.56265   | EMMA     | 11700    | 1.83836   | Brown-Forsythe |

**Supplementary Table 32 - GWA (M) and vGWA (V) scores and ranks of trait 44: FRI**

| Gene        | Gene ID   | Chr | Rank (M) | Score (M) | Test (M) | Rank (V) | Score (V) | Test (V)       |
|-------------|-----------|-----|----------|-----------|----------|----------|-----------|----------------|
| FRI         | AT4G00650 | 4   | 1        | 14.291    | Wilcoxon | 475      | 3.96965   | Brown-Forsythe |
| sim-to-ESD4 | AT4G00690 | 4   | 1        | 14.291    | Wilcoxon | 475      | 3.96965   | Brown-Forsythe |
| CRP         | AT4G00450 | 4   | 11       | 8.32062   | Wilcoxon | 1646     | 3.13048   | Brown-Forsythe |
| ETC3        | AT4G01060 | 4   | 36       | 6.04476   | Wilcoxon | 687      | 3.69518   | Brown-Forsythe |
| YAP169      | AT5G07200 | 5   | 93       | 4.9258    | Wilcoxon | 2183     | 2.94368   | Brown-Forsythe |
| ESD4        | AT4G15880 | 4   | 114      | 4.75766   | Wilcoxon | 484      | 3.95061   | Brown-Forsythe |
| SPA1        | AT2G46340 | 2   | 120      | 4.70695   | Wilcoxon | 4447     | 2.4814    | Brown-Forsythe |
| CUL4        | AT5G46210 | 5   | 136      | 4.64302   | Wilcoxon | 10146    | 1.94423   | Brown-Forsythe |
| SKB1        | AT4G31120 | 4   | 189      | 4.42435   | Wilcoxon | 129      | 5.10225   | Brown-Forsythe |
| ATARP4      | AT1G18450 | 1   | 201      | 4.3737    | Wilcoxon | 5151     | 2.38273   | Brown-Forsythe |
| FRI         | AT4G00650 | 4   | 1        | 23.4027   | EMMA     | 475      | 3.96965   | Brown-Forsythe |
| sim-to-ESD4 | AT4G00690 | 4   | 1        | 23.4027   | EMMA     | 475      | 3.96965   | Brown-Forsythe |
| CRP         | AT4G00450 | 4   | 11       | 11.1729   | EMMA     | 1646     | 3.13048   | Brown-Forsythe |
| ETC3        | AT4G01060 | 4   | 38       | 6.28005   | EMMA     | 687      | 3.69518   | Brown-Forsythe |
| SKB1        | AT4G31120 | 4   | 88       | 4.291     | EMMA     | 129      | 5.10225   | Brown-Forsythe |
| CUL4        | AT5G46210 | 5   | 99       | 4.15739   | EMMA     | 10146    | 1.94423   | Brown-Forsythe |
| AGL18       | AT3G57390 | 3   | 141      | 3.76624   | EMMA     | 15010    | 1.69333   | Brown-Forsythe |
| ATGID1B     | AT3G63010 | 3   | 170      | 3.52783   | EMMA     | 1676     | 3.11698   | Brown-Forsythe |
| sim-to-REF6 | AT5G46910 | 5   | 233      | 3.27626   | EMMA     | 550      | 3.84155   | Brown-Forsythe |
| AGL8        | AT5G60910 | 5   | 234      | 3.27625   | EMMA     | 7079     | 2.17991   | Brown-Forsythe |

**Supplementary Table 33** - GWA (M) and vGWA (V) scores and ranks of trait 45: 8W GH FT

| Gene        | Gene ID   | Chr | Rank (M) | Score (M) | Test (M) | Rank (V) | Score (V) | Test (V)       |
|-------------|-----------|-----|----------|-----------|----------|----------|-----------|----------------|
| DOG1        | AT5G45830 | 5   | 13       | 9.45204   | Wilcoxon | 38       | 6.43965   | Brown-Forsythe |
| sim-to-VRN1 | AT4G33280 | 4   | 27       | 8.78487   | Wilcoxon | 12128    | 1.97819   | Brown-Forsythe |
| HEN2        | AT2G06990 | 2   | 48       | 8.41001   | Wilcoxon | 958      | 3.84241   | Brown-Forsythe |
| ATGA2OX7    | AT1G50960 | 1   | 58       | 8.23991   | Wilcoxon | 1878     | 3.32826   | Brown-Forsythe |
| GASA5       | AT3G02885 | 3   | 60       | 8.21011   | Wilcoxon | 30       | 6.79464   | Brown-Forsythe |
| ATH1        | AT4G32980 | 4   | 63       | 8.08653   | Wilcoxon | 1881     | 3.32809   | Brown-Forsythe |
| RAV1        | AT1G13260 | 1   | 87       | 7.84994   | Wilcoxon | 2918     | 3.00696   | Brown-Forsythe |
| sim-to-FCA  | AT2G47310 | 2   | 100      | 7.55871   | Wilcoxon | 4902     | 2.62122   | Brown-Forsythe |
| SH2         | AT2G42830 | 2   | 158      | 7.09915   | Wilcoxon | 4060     | 2.75258   | Brown-Forsythe |
| AGL17       | AT2G22630 | 2   | 216      | 6.78661   | Wilcoxon | 504      | 4.42976   | Brown-Forsythe |
| DOG1        | AT5G45830 | 5   | 3        | 5.68175   | EMMA     | 38       | 6.43965   | Brown-Forsythe |
| FLC         | AT5G10140 | 5   | 10       | 4.92142   | EMMA     | 17       | 7.24092   | Brown-Forsythe |
| ELF8        | AT2G06210 | 2   | 37       | 4.30737   | EMMA     | 653      | 4.17646   | Brown-Forsythe |
| LDL1        | AT1G62830 | 1   | 62       | 3.96084   | EMMA     | 3843     | 2.79563   | Brown-Forsythe |
| PAT1        | AT5G48150 | 5   | 71       | 3.89735   | EMMA     | 722      | 4.08351   | Brown-Forsythe |
| SVP         | AT2G22540 | 2   | 92       | 3.83531   | EMMA     | 504      | 4.42976   | Brown-Forsythe |
| GASA5       | AT3G02885 | 3   | 95       | 3.82346   | EMMA     | 30       | 6.79464   | Brown-Forsythe |
| VIP5        | AT1G61040 | 1   | 124      | 3.61616   | EMMA     | 1025     | 3.77736   | Brown-Forsythe |
| FES1        | AT2G33835 | 2   | 133      | 3.58601   | EMMA     | 24289    | 1.50854   | Brown-Forsythe |
| SPL3        | AT2G33810 | 2   | 133      | 3.58601   | EMMA     | 24289    | 1.50854   | Brown-Forsythe |

**Supplementary Table 34** - GWA (M) and vGWA (V) scores and ranks of trait 46: 8W GH LN

| Gene        | Gene ID   | Chr | Rank (M) | Score (M) | Test (M) | Rank (V) | Score (V) | Test (V)       |
|-------------|-----------|-----|----------|-----------|----------|----------|-----------|----------------|
| DOG1        | AT5G45830 | 5   | 2        | 9.12376   | Wilcoxon | 61       | 7.03691   | Brown-Forsythe |
| ATGA2OX7    | AT1G50960 | 1   | 6        | 8.80264   | Wilcoxon | 6462     | 2.56899   | Brown-Forsythe |
| CRY1        | AT4G08920 | 4   | 7        | 8.75653   | Wilcoxon | 570      | 4.72558   | Brown-Forsythe |
| ATH1        | AT4G32980 | 4   | 8        | 8.72322   | Wilcoxon | 1809     | 3.68375   | Brown-Forsythe |
| sim-to-VRN1 | AT4G33280 | 4   | 12       | 8.65723   | Wilcoxon | 5350     | 2.72149   | Brown-Forsythe |
| HEN2        | AT2G06990 | 2   | 22       | 8.33749   | Wilcoxon | 81       | 6.75967   | Brown-Forsythe |
| PHYB        | AT2G18790 | 2   | 65       | 7.19898   | Wilcoxon | 402      | 5.04094   | Brown-Forsythe |
| ETC3        | AT4G01060 | 4   | 78       | 7.04572   | Wilcoxon | 881      | 4.36149   | Brown-Forsythe |
| CO          | AT5G15840 | 5   | 87       | 7.02188   | Wilcoxon | 24       | 7.94591   | Brown-Forsythe |
| COL1        | AT5G15850 | 5   | 87       | 7.02188   | Wilcoxon | 24       | 7.94591   | Brown-Forsythe |
| FRI         | AT4G00650 | 4   | 2        | 6.8722    | EMMA     | 15114    | 1.89774   | Brown-Forsythe |
| sim-to-ESD4 | AT4G00690 | 4   | 2        | 6.8722    | EMMA     | 14403    | 1.93338   | Brown-Forsythe |
| AGL15       | AT5G13790 | 5   | 7        | 5.55414   | EMMA     | 6596     | 2.55154   | Brown-Forsythe |
| DOG1        | AT5G45830 | 5   | 9        | 5.02585   | EMMA     | 61       | 7.03691   | Brown-Forsythe |
| HEN2        | AT2G06990 | 2   | 13       | 4.75819   | EMMA     | 81       | 6.75967   | Brown-Forsythe |
| CRY1        | AT4G08920 | 4   | 31       | 4.37153   | EMMA     | 570      | 4.72558   | Brown-Forsythe |
| ATH1        | AT4G32980 | 4   | 32       | 4.35096   | EMMA     | 1809     | 3.68375   | Brown-Forsythe |
| CO          | AT5G15840 | 5   | 36       | 4.19578   | EMMA     | 24       | 7.94591   | Brown-Forsythe |
| COL1        | AT5G15850 | 5   | 36       | 4.19578   | EMMA     | 24       | 7.94591   | Brown-Forsythe |
| FRL1        | AT5G16320 | 5   | 39       | 4.13468   | EMMA     | 41       | 7.38796   | Brown-Forsythe |

**Supplementary Table 35** - GWA (M) and vGWA (V) scores and ranks of trait 47: 0W GH FT

| Gene        | Gene ID   | Chr | Rank (M) | Score (M) | Test (M) | Rank (V) | Score (V) | Test (V)       |
|-------------|-----------|-----|----------|-----------|----------|----------|-----------|----------------|
| ETC3        | AT4G01060 | 4   | 6        | 9.51193   | Wilcoxon | 1058     | 7.52981   | Brown-Forsythe |
| AGL17       | AT2G22630 | 2   | 13       | 9.25378   | Wilcoxon | 1        | 23.22219  | Brown-Forsythe |
| SVP         | AT2G22540 | 2   | 13       | 9.25378   | Wilcoxon | 1        | 23.22219  | Brown-Forsythe |
| DFL2        | AT4G03400 | 4   | 17       | 9.24797   | Wilcoxon | 109      | 12.3346   | Brown-Forsythe |
| ATARP4      | AT1G18450 | 1   | 30       | 8.85728   | Wilcoxon | 2833     | 5.67523   | Brown-Forsythe |
| RAV1        | AT1G13260 | 1   | 48       | 8.58298   | Wilcoxon | 152      | 11.55033  | Brown-Forsythe |
| ATH1        | AT4G32980 | 4   | 77       | 8.27901   | Wilcoxon | 2536     | 5.87017   | Brown-Forsythe |
| FRI         | AT4G00650 | 4   | 86       | 8.21846   | Wilcoxon | 459      | 9.38768   | Brown-Forsythe |
| GASA5       | AT3G02885 | 3   | 110      | 8.07613   | Wilcoxon | 433      | 9.4811    | Brown-Forsythe |
| PAT1        | AT5G48150 | 5   | 123      | 7.96829   | Wilcoxon | 1129     | 7.41232   | Brown-Forsythe |
| SVP         | AT2G22540 | 2   | 10       | 5.81731   | EMMA     | 1        | 23.22219  | Brown-Forsythe |
| AGL17       | AT2G22630 | 2   | 10       | 5.81731   | EMMA     | 1        | 23.22219  | Brown-Forsythe |
| FRI         | AT4G00650 | 4   | 24       | 5.26745   | EMMA     | 459      | 9.38768   | Brown-Forsythe |
| sim-to-ESD4 | AT4G00690 | 4   | 24       | 5.26745   | EMMA     | 459      | 9.38768   | Brown-Forsythe |
| AT2G30810   | AT2G30810 | 2   | 35       | 4.98061   | EMMA     | 723      | 8.30233   | Brown-Forsythe |
| SPA4        | AT1G53090 | 1   | 39       | 4.85632   | EMMA     | 218      | 10.77637  | Brown-Forsythe |
| SPL4        | AT1G53160 | 1   | 39       | 4.85632   | EMMA     | 218      | 10.77637  | Brown-Forsythe |
| SMZ         | AT3G54990 | 3   | 49       | 4.68024   | EMMA     | 4156     | 5.00853   | Brown-Forsythe |
| ETC3        | AT4G01060 | 4   | 54       | 4.56776   | EMMA     | 1058     | 7.52981   | Brown-Forsythe |
| ATARP4      | AT1G18450 | 1   | 60       | 4.48035   | EMMA     | 2833     | 5.67523   | Brown-Forsythe |

**Supplementary Table 36** - GWA (M) and vGWA (V) scores and ranks of trait 48: 0W GH LN

| Gene        | Gene ID   | Chr | Rank (M) | Score (M) | Test (M) | Rank (V) | Score (V) | Test (V)       |
|-------------|-----------|-----|----------|-----------|----------|----------|-----------|----------------|
| ETC3        | AT4G01060 | 4   | 1        | 7.21016   | Wilcoxon | 96       | 6.34154   | Brown-Forsythe |
| DOG1        | AT5G45830 | 5   | 5        | 6.74401   | Wilcoxon | 5        | 10.22745  | Brown-Forsythe |
| FRI         | AT4G00650 | 4   | 47       | 5.27161   | Wilcoxon | 2226     | 3.37527   | Brown-Forsythe |
| sim-to-ESD4 | AT4G00690 | 4   | 47       | 5.27161   | Wilcoxon | 2226     | 3.37527   | Brown-Forsythe |
| CO          | AT5G15840 | 5   | 61       | 5.13955   | Wilcoxon | 3262     | 3.07667   | Brown-Forsythe |
| COL1        | AT5G15850 | 5   | 61       | 5.13955   | Wilcoxon | 3262     | 3.07667   | Brown-Forsythe |
| ATH1        | AT4G32980 | 4   | 100      | 4.74291   | Wilcoxon | 850      | 4.10764   | Brown-Forsythe |
| VIM1        | AT1G57820 | 1   | 106      | 4.70271   | Wilcoxon | 1907     | 3.49043   | Brown-Forsythe |
| sim-to-VRN1 | AT4G33280 | 4   | 198      | 4.3151    | Wilcoxon | 1002     | 3.98791   | Brown-Forsythe |
| FHL         | AT5G02200 | 5   | 207      | 4.30446   | Wilcoxon | 2584     | 3.25611   | Brown-Forsythe |
| FRI         | AT4G00650 | 4   | 8        | 4.40313   | EMMA     | 2226     | 3.37527   | Brown-Forsythe |
| sim-to-ESD4 | AT4G00690 | 4   | 8        | 4.40313   | EMMA     | 2226     | 3.37527   | Brown-Forsythe |
| FCA         | AT4G16280 | 4   | 107      | 3.29776   | EMMA     | 970      | 4.00956   | Brown-Forsythe |
| PHYD        | AT4G16250 | 4   | 107      | 3.29776   | EMMA     | 970      | 4.00956   | Brown-Forsythe |
| ETC3        | AT4G01060 | 4   | 119      | 3.24721   | EMMA     | 96       | 6.34154   | Brown-Forsythe |
| AGL24       | AT4G24540 | 4   | 151      | 3.1231    | EMMA     | 10427    | 2.12234   | Brown-Forsythe |
| AGL14       | AT4G11880 | 4   | 156      | 3.09849   | EMMA     | 50       | 7.00588   | Brown-Forsythe |
| SEPALLATA2  | AT3G02310 | 3   | 189      | 3.00315   | EMMA     | 9267     | 2.22001   | Brown-Forsythe |
| COL2        | AT3G02380 | 3   | 189      | 3.00315   | EMMA     | 9267     | 2.22001   | Brown-Forsythe |
| FD          | AT4G35900 | 4   | 204      | 2.97328   | EMMA     | 6782     | 2.46747   | Brown-Forsythe |

**Supplementary Table 37** - GWA (M) and vGWA (V) scores and ranks of trait 57: FT Field

| Gene        | Gene ID   | Chr | Rank (M) | Score (M) | Test (M) | Rank (V) | Score (V) | Test (V)       |
|-------------|-----------|-----|----------|-----------|----------|----------|-----------|----------------|
| ATH1        | AT4G32980 | 4   | 19       | 10.1569   | Wilcoxon | 5710     | 2.18997   | Brown-Forsythe |
| AGL16       | AT3G57230 | 3   | 21       | 10.0736   | Wilcoxon | 1999     | 2.86774   | Brown-Forsythe |
| sim-to-VRN1 | AT4G33280 | 4   | 29       | 9.76096   | Wilcoxon | 4600     | 2.32342   | Brown-Forsythe |
| DOG1        | AT5G45830 | 5   | 35       | 9.5235    | Wilcoxon | 610      | 3.73985   | Brown-Forsythe |
| AGL18       | AT3G57390 | 3   | 39       | 9.24223   | Wilcoxon | 947      | 3.39753   | Brown-Forsythe |
| ETC3        | AT4G01060 | 4   | 68       | 8.73049   | Wilcoxon | 5185     | 2.25158   | Brown-Forsythe |
| MMP         | AT1G70170 | 1   | 90       | 8.33638   | Wilcoxon | 12733    | 1.72854   | Brown-Forsythe |
| LKP2        | AT2G18915 | 2   | 94       | 8.25415   | Wilcoxon | 6968     | 2.07529   | Brown-Forsythe |
| FY          | AT5G13480 | 5   | 100      | 8.16873   | Wilcoxon | 17701    | 1.54699   | Brown-Forsythe |
| ATGA2OX7    | AT1G50960 | 1   | 117      | 7.96492   | Wilcoxon | 7885     | 2.0019    | Brown-Forsythe |
| TSF         | AT4G20370 | 4   | 3        | 5.7133    | EMMA     | 564      | 3.79348   | Brown-Forsythe |
| APRR5       | AT5G24470 | 5   | 8        | 4.99778   | EMMA     | 3426     | 2.50235   | Brown-Forsythe |
| ATHAP2B     | AT3G05690 | 3   | 12       | 4.57815   | EMMA     | 11       | 8.76338   | Brown-Forsythe |
| HEN2        | AT2G06990 | 2   | 17       | 4.41825   | EMMA     | 1886     | 2.91227   | Brown-Forsythe |
| DOG1        | AT5G45830 | 5   | 31       | 4.10872   | EMMA     | 610      | 3.73985   | Brown-Forsythe |
| ELF5        | AT5G62640 | 5   | 33       | 4.04498   | EMMA     | 4820     | 2.29623   | Brown-Forsythe |
| LD          | AT4G02560 | 4   | 50       | 3.92096   | EMMA     | 4751     | 2.30544   | Brown-Forsythe |
| GI          | AT1G22770 | 1   | 100      | 3.485     | EMMA     | 3579     | 2.47414   | Brown-Forsythe |
| DDF2        | AT1G63030 | 1   | 102      | 3.47798   | EMMA     | 7770     | 2.0099    | Brown-Forsythe |
| sim-to-VRN1 | AT4G33280 | 4   | 121      | 3.41989   | EMMA     | 4600     | 2.32342   | Brown-Forsythe |

**Supplementary Table 38** - GWA (M) and vGWA (V) scores and ranks of trait 58: FT Diameter Field

| Gene   | Gene ID   | Chr | Rank (M) | Score (M) | Test (M) | Rank (V) | Score (V) | Test (V)       |
|--------|-----------|-----|----------|-----------|----------|----------|-----------|----------------|
| SVP    | AT2G22540 | 2   | 1        | 9.74548   | Wilcoxon | 826      | 2.41492   | Brown-Forsythe |
| ICU2   | AT5G67100 | 5   | 3        | 9.4309    | Wilcoxon | 1008     | 2.32701   | Brown-Forsythe |
| FHL    | AT5G02200 | 5   | 82       | 7.30149   | Wilcoxon | 320      | 2.82008   | Brown-Forsythe |
| FPF1   | AT5G24860 | 5   | 143      | 6.80907   | Wilcoxon | 1298     | 2.22148   | Brown-Forsythe |
| GA4H   | AT1G80340 | 1   | 187      | 6.5702    | Wilcoxon | 593      | 2.57027   | Brown-Forsythe |
| DDF1   | AT1G12610 | 1   | 237      | 6.40908   | Wilcoxon | 1687     | 2.11484   | Brown-Forsythe |
| ELF5   | AT5G62640 | 5   | 253      | 6.35884   | Wilcoxon | 19213    | 1.0854    | Brown-Forsythe |
| FES1   | AT2G33835 | 2   | 257      | 6.35111   | Wilcoxon | 7466     | 1.48621   | Brown-Forsythe |
| SPL3   | AT2G33810 | 2   | 257      | 6.35111   | Wilcoxon | 14189    | 1.21289   | Brown-Forsythe |
| FWA    | AT4G25530 | 4   | 316      | 6.11017   | Wilcoxon | 17150    | 1.13242   | Brown-Forsythe |
| ETC3   | AT4G01060 | 4   | 16       | 8.70176   | EMMA     | 5719     | 1.59997   | Brown-Forsythe |
| DOG1   | AT5G45830 | 5   | 17       | 8.53689   | EMMA     | 692      | 2.49891   | Brown-Forsythe |
| ATARP4 | AT1G18450 | 1   | 31       | 7.98428   | EMMA     | 5157     | 1.63877   | Brown-Forsythe |
| CO     | AT5G15840 | 5   | 40       | 7.789     | EMMA     | 7481     | 1.48494   | Brown-Forsythe |
| COL1   | AT5G15850 | 5   | 40       | 7.789     | EMMA     | 7481     | 1.48494   | Brown-Forsythe |
| SVP    | AT2G22540 | 2   | 45       | 7.72477   | EMMA     | 826      | 2.41492   | Brown-Forsythe |
| ATH1   | AT4G32980 | 4   | 46       | 7.68272   | EMMA     | 1099     | 2.29132   | Brown-Forsythe |
| FRI    | AT4G00650 | 4   | 47       | 7.64895   | EMMA     | 2895     | 1.88172   | Brown-Forsythe |
| AGL17  | AT2G22630 | 2   | 54       | 7.52425   | EMMA     | 3272     | 1.83549   | Brown-Forsythe |
| YAP169 | AT5G07200 | 5   | 58       | 7.47533   | EMMA     | 665      | 2.51972   | Brown-Forsythe |



**Supplementary Table 39 - GWA (M) and vGWA (V) scores and ranks of trait 59: FT GH**

| Gene   | Gene ID   | Chr | Rank (M) | Score (M) | Test (M) | Rank (V) | Score (V) | Test (V)       |
|--------|-----------|-----|----------|-----------|----------|----------|-----------|----------------|
| ICU2   | AT5G67100 | 5   | 5        | 4.99591   | Wilcoxon | 929      | 7.06528   | Brown-Forsythe |
| SVP    | AT2G22540 | 2   | 19       | 4.21499   | Wilcoxon | 1        | 27.22107  | Brown-Forsythe |
| FHL    | AT5G02200 | 5   | 33       | 3.95209   | Wilcoxon | 4749     | 4.46467   | Brown-Forsythe |
| DDF2   | AT1G63030 | 1   | 59       | 3.6236    | Wilcoxon | 10291    | 3.28968   | Brown-Forsythe |
| FLP1   | AT4G31380 | 4   | 143      | 3.26417   | Wilcoxon | 2585     | 5.42501   | Brown-Forsythe |
| SAR3   | AT1G80680 | 1   | 215      | 3.07062   | Wilcoxon | 2320     | 5.61479   | Brown-Forsythe |
| PHYD   | AT4G16250 | 4   | 245      | 3.01107   | Wilcoxon | 750      | 7.43897   | Brown-Forsythe |
| LIP1   | AT5G64813 | 5   | 278      | 2.96784   | Wilcoxon | 16410    | 2.62288   | Brown-Forsythe |
| DDF1   | AT1G12610 | 1   | 304      | 2.91061   | Wilcoxon | 1196     | 6.67191   | Brown-Forsythe |
| VIM1   | AT1G57820 | 1   | 321      | 2.88968   | Wilcoxon | 838      | 7.24963   | Brown-Forsythe |
| ATARP4 | AT1G18450 | 1   | 1        | 7.02089   | EMMA     | 41       | 12.59875  | Brown-Forsythe |
| AGL17  | AT2G22630 | 2   | 15       | 5.14164   | EMMA     | 1        | 27.22107  | Brown-Forsythe |
| SVP    | AT2G22540 | 2   | 17       | 5.1299    | EMMA     | 1        | 27.22107  | Brown-Forsythe |
| YAP169 | AT5G07200 | 5   | 19       | 5.11259   | EMMA     | 37       | 13.21657  | Brown-Forsythe |
| ETC3   | AT4G01060 | 4   | 30       | 4.73865   | EMMA     | 260      | 9.17287   | Brown-Forsythe |
| DOG1   | AT5G45830 | 5   | 31       | 4.7336    | EMMA     | 199      | 9.75233   | Brown-Forsythe |
| FRI    | AT4G00650 | 4   | 36       | 4.47972   | EMMA     | 1113     | 6.78325   | Brown-Forsythe |
| DFL2   | AT4G03400 | 4   | 37       | 4.47586   | EMMA     | 355      | 8.6994    | Brown-Forsythe |
| PAT1   | AT5G48150 | 5   | 58       | 3.9579    | EMMA     | 995      | 6.961     | Brown-Forsythe |
| SPA4   | AT1G53090 | 1   | 66       | 3.9173    | EMMA     | 242      | 9.32867   | Brown-Forsythe |

**Supplementary Table 40 - GWA (M) and vGWA (V) scores and ranks of trait 60: FT Duration GH**

| Gene      | Gene ID   | Chr | Rank (M) | Score (M) | Test (M) | Rank (V) | Score (V) | Test (V)       |
|-----------|-----------|-----|----------|-----------|----------|----------|-----------|----------------|
| GASA4     | AT5G15230 | 5   | 3        | 6.06219   | Wilcoxon | 273      | 4.30491   | Brown-Forsythe |
| ICU2      | AT5G67100 | 5   | 12       | 5.36677   | Wilcoxon | 323      | 4.2072    | Brown-Forsythe |
| ELF6      | AT5G04240 | 5   | 23       | 5.07589   | Wilcoxon | 3168     | 2.68453   | Brown-Forsythe |
| EMS1      | AT5G07280 | 5   | 40       | 4.82342   | Wilcoxon | 911      | 3.52167   | Brown-Forsythe |
| TFL1      | AT5G03840 | 5   | 44       | 4.73743   | Wilcoxon | 260      | 4.33155   | Brown-Forsythe |
| ATHB51    | AT5G03790 | 5   | 99       | 4.4044    | Wilcoxon | 260      | 4.33155   | Brown-Forsythe |
| CO        | AT5G15840 | 5   | 116      | 4.31182   | Wilcoxon | 547      | 3.83505   | Brown-Forsythe |
| COL1      | AT5G15850 | 5   | 116      | 4.31182   | Wilcoxon | 547      | 3.83505   | Brown-Forsythe |
| ULT1      | AT4G28190 | 4   | 170      | 4.17324   | Wilcoxon | 2231     | 2.90888   | Brown-Forsythe |
| AT2G39540 | AT2G39540 | 2   | 175      | 4.14769   | Wilcoxon | 469      | 3.94993   | Brown-Forsythe |
| GASA4     | AT5G15230 | 5   | 2        | 7.72389   | EMMA     | 273      | 4.30491   | Brown-Forsythe |
| TFL1      | AT5G03840 | 5   | 30       | 4.89038   | EMMA     | 260      | 4.33155   | Brown-Forsythe |
| ICU2      | AT5G67100 | 5   | 31       | 4.85869   | EMMA     | 323      | 4.2072    | Brown-Forsythe |
| ELF6      | AT5G04240 | 5   | 37       | 4.63856   | EMMA     | 3168     | 2.68453   | Brown-Forsythe |
| EMS1      | AT5G07280 | 5   | 48       | 4.34813   | EMMA     | 911      | 3.52167   | Brown-Forsythe |
| CO        | AT5G15840 | 5   | 65       | 4.05765   | EMMA     | 547      | 3.83505   | Brown-Forsythe |
| COL1      | AT5G15850 | 5   | 65       | 4.05765   | EMMA     | 547      | 3.83505   | Brown-Forsythe |
| GCR1      | AT1G48270 | 1   | 71       | 4.00853   | EMMA     | 3251     | 2.66861   | Brown-Forsythe |
| HUA2      | AT5G23150 | 5   | 83       | 3.89486   | EMMA     | 7170     | 2.14691   | Brown-Forsythe |
| ETC3      | AT4G01060 | 4   | 125      | 3.67675   | EMMA     | 317      | 4.21319   | Brown-Forsythe |

**Supplementary Table 41 - GWA (M) and vGWA (V) scores and ranks of trait 61: LC Duration GH**

| Gene        | Gene ID   | Chr | Rank (M) | Score (M) | Test (M) | Rank (V) | Score (V) | Test (V)       |
|-------------|-----------|-----|----------|-----------|----------|----------|-----------|----------------|
| ICU2        | AT5G67100 | 5   | 10       | 6.60842   | Wilcoxon | 252      | 5.1213    | Brown-Forsythe |
| ETC3        | AT4G01060 | 4   | 37       | 5.91516   | Wilcoxon | 816      | 4.16175   | Brown-Forsythe |
| AGL18       | AT3G57390 | 3   | 48       | 5.70703   | Wilcoxon | 536      | 4.51159   | Brown-Forsythe |
| SRR1        | AT5G59560 | 5   | 61       | 5.41654   | Wilcoxon | 124      | 5.71056   | Brown-Forsythe |
| GASA4       | AT5G15230 | 5   | 90       | 5.18667   | Wilcoxon | 3084     | 2.95986   | Brown-Forsythe |
| EZA1        | AT4G02020 | 4   | 98       | 5.11184   | Wilcoxon | 7        | 7.51537   | Brown-Forsythe |
| FAR1        | AT4G15090 | 4   | 100      | 5.10149   | Wilcoxon | 2142     | 3.25091   | Brown-Forsythe |
| ATGA2OX7    | AT1G50960 | 1   | 107      | 5.0705    | Wilcoxon | 3435     | 2.87576   | Brown-Forsythe |
| AGL14       | AT4G11880 | 4   | 124      | 5.003     | Wilcoxon | 328      | 4.89805   | Brown-Forsythe |
| APRR3       | AT5G60100 | 5   | 133      | 4.94209   | Wilcoxon | 6489     | 2.40776   | Brown-Forsythe |
| AGL14       | AT4G11880 | 4   | 4        | 5.5404    | EMMA     | 328      | 4.89805   | Brown-Forsythe |
| ETC3        | AT4G01060 | 4   | 12       | 4.77407   | EMMA     | 816      | 4.16175   | Brown-Forsythe |
| sim-to-VRN1 | AT4G33280 | 4   | 40       | 4.00147   | EMMA     | 397      | 4.77173   | Brown-Forsythe |
| FAR1        | AT4G15090 | 4   | 83       | 3.56067   | EMMA     | 2142     | 3.25091   | Brown-Forsythe |
| FT          | AT1G65480 | 1   | 132      | 3.31958   | EMMA     | 1800     | 3.39503   | Brown-Forsythe |
| AGL18       | AT3G57390 | 3   | 158      | 3.23721   | EMMA     | 536      | 4.51159   | Brown-Forsythe |
| CUL4        | AT5G46210 | 5   | 171      | 3.19609   | EMMA     | 1333     | 3.68188   | Brown-Forsythe |
| AT5G59570   | AT5G59570 | 5   | 174      | 3.19111   | EMMA     | 124      | 5.71056   | Brown-Forsythe |
| SRR1        | AT5G59560 | 5   | 174      | 3.19111   | EMMA     | 124      | 5.71056   | Brown-Forsythe |
| SKB1        | AT4G31120 | 4   | 188      | 3.16607   | EMMA     | 4354     | 2.68994   | Brown-Forsythe |

**Supplementary Table 42 - GWA (M) and vGWA (V) scores and ranks of trait 62: LFS GH**

| Gene        | Gene ID   | Chr | Rank (M) | Score (M) | Test (M) | Rank (V) | Score (V) | Test (V)       |
|-------------|-----------|-----|----------|-----------|----------|----------|-----------|----------------|
| ICU2        | AT5G67100 | 5   | 7        | 7.04614   | Wilcoxon | 258      | 5.33472   | Brown-Forsythe |
| ETC3        | AT4G01060 | 4   | 41       | 5.85085   | Wilcoxon | 596      | 4.64015   | Brown-Forsythe |
| GASA4       | AT5G15230 | 5   | 57       | 5.63531   | Wilcoxon | 3487     | 2.92405   | Brown-Forsythe |
| ATGA2OX7    | AT1G50960 | 1   | 74       | 5.42484   | Wilcoxon | 890      | 4.21286   | Brown-Forsythe |
| SRR1        | AT5G59560 | 5   | 92       | 5.31907   | Wilcoxon | 298      | 5.2176    | Brown-Forsythe |
| EZA1        | AT4G02020 | 4   | 100      | 5.23133   | Wilcoxon | 9        | 8.01982   | Brown-Forsythe |
| FAR1        | AT4G15090 | 4   | 106      | 5.19726   | Wilcoxon | 3600     | 2.90005   | Brown-Forsythe |
| AT5G59570   | AT5G59570 | 5   | 125      | 5.0691    | Wilcoxon | 298      | 5.2176    | Brown-Forsythe |
| AGL18       | AT3G57390 | 3   | 126      | 5.06899   | Wilcoxon | 1630     | 3.61929   | Brown-Forsythe |
| APRR3       | AT5G60100 | 5   | 133      | 5.03744   | Wilcoxon | 4877     | 2.6529    | Brown-Forsythe |
| AGL15       | AT5G13790 | 5   | 20       | 4.33222   | EMMA     | 3390     | 2.94533   | Brown-Forsythe |
| ETC3        | AT4G01060 | 4   | 30       | 4.11271   | EMMA     | 596      | 4.64015   | Brown-Forsythe |
| sim-to-VRN1 | AT4G33280 | 4   | 32       | 4.10289   | EMMA     | 355      | 5.11159   | Brown-Forsythe |
| AGL14       | AT4G11880 | 4   | 36       | 3.99126   | EMMA     | 1087     | 4.01876   | Brown-Forsythe |
| FT          | AT1G65480 | 1   | 48       | 3.88101   | EMMA     | 1252     | 3.8963    | Brown-Forsythe |
| SKB1        | AT4G31120 | 4   | 57       | 3.83013   | EMMA     | 4099     | 2.78869   | Brown-Forsythe |
| FPF1        | AT5G24860 | 5   | 70       | 3.67151   | EMMA     | 1910     | 3.46686   | Brown-Forsythe |
| YAP169      | AT5G07200 | 5   | 149      | 3.27233   | EMMA     | 2651     | 3.1734    | Brown-Forsythe |
| FRI         | AT4G00650 | 4   | 155      | 3.25513   | EMMA     | 848      | 4.26303   | Brown-Forsythe |
| PHYB        | AT2G18790 | 2   | 169      | 3.216     | EMMA     | 4546     | 2.70421   | Brown-Forsythe |

**Supplementary Table 43 - GWA (M) and vGWA (V) scores and ranks of trait 63: MT GH**

| Gene    | Gene ID   | Chr | Rank (M) | Score (M) | Test (M) | Rank (V) | Score (V) | Test (V)       |
|---------|-----------|-----|----------|-----------|----------|----------|-----------|----------------|
| INO     | AT1G23420 | 1   | 26       | 5.52847   | Wilcoxon | 592      | 4.04437   | Brown-Forsythe |
| ATHB-2  | AT4G16780 | 4   | 35       | 5.37416   | Wilcoxon | 547      | 4.09856   | Brown-Forsythe |
| MBD9    | AT3G01460 | 3   | 64       | 5.04365   | Wilcoxon | 10262    | 2.08803   | Brown-Forsythe |
| VIM1    | AT1G57820 | 1   | 95       | 4.74992   | Wilcoxon | 1668     | 3.34231   | Brown-Forsythe |
| FRI     | AT4G00650 | 4   | 108      | 4.66187   | Wilcoxon | 4196     | 2.72816   | Brown-Forsythe |
| PHYB    | AT2G18790 | 2   | 129      | 4.5873    | Wilcoxon | 1224     | 3.55423   | Brown-Forsythe |
| CDF1    | AT5G62430 | 5   | 138      | 4.56465   | Wilcoxon | 2935     | 2.96632   | Brown-Forsythe |
| ELIP2   | AT4G14690 | 4   | 148      | 4.50558   | Wilcoxon | 5712     | 2.50627   | Brown-Forsythe |
| ATFYPP3 | AT3G19980 | 3   | 185      | 4.35604   | Wilcoxon | 1157     | 3.59144   | Brown-Forsythe |
| LD      | AT4G02560 | 4   | 193      | 4.33028   | Wilcoxon | 9163     | 2.17147   | Brown-Forsythe |
| ATFYPP3 | AT3G19980 | 3   | 32       | 4.28567   | EMMA     | 1157     | 3.59144   | Brown-Forsythe |
| ATHB-2  | AT4G16780 | 4   | 33       | 4.19755   | EMMA     | 547      | 4.09856   | Brown-Forsythe |
| TOC1    | AT5G61380 | 5   | 50       | 3.80929   | EMMA     | 1115     | 3.61704   | Brown-Forsythe |
| PHYC    | AT5G35840 | 5   | 62       | 3.67719   | EMMA     | 321      | 4.44172   | Brown-Forsythe |
| PGI1    | AT4G24620 | 4   | 73       | 3.58915   | EMMA     | 9258     | 2.163     | Brown-Forsythe |
| GASA2   | AT4G09610 | 4   | 85       | 3.51907   | EMMA     | 450      | 4.23022   | Brown-Forsythe |
| FKF1    | AT1G68050 | 1   | 97       | 3.46113   | EMMA     | 10595    | 2.06648   | Brown-Forsythe |
| FRI     | AT4G00650 | 4   | 107      | 3.43311   | EMMA     | 4196     | 2.72816   | Brown-Forsythe |
| CIP1    | AT5G41790 | 5   | 149      | 3.21648   | EMMA     | 7213     | 2.34032   | Brown-Forsythe |
| VIM1    | AT1G57820 | 1   | 188      | 3.11331   | EMMA     | 1668     | 3.34231   | Brown-Forsythe |

**Supplementary Table 44 - GWA (M) and vGWA (V) scores and ranks of trait 64: RP GH**

| Gene   | Gene ID   | Chr | Rank (M) | Score (M) | Test (M) | Rank (V) | Score (V) | Test (V)       |
|--------|-----------|-----|----------|-----------|----------|----------|-----------|----------------|
| DDF1   | AT1G12610 | 1   | 11       | 5.09769   | Wilcoxon | 251      | 4.78225   | Brown-Forsythe |
| GASA   | AT5G15230 | 5   | 29       | 4.70264   | Wilcoxon | 1806     | 2.94381   | Brown-Forsythe |
| ELF6   | AT5G04240 | 5   | 49       | 4.49959   | Wilcoxon | 2274     | 2.78546   | Brown-Forsythe |
| ICU2   | AT5G67100 | 5   | 52       | 4.46503   | Wilcoxon | 1076     | 3.40069   | Brown-Forsythe |
| FY     | AT5G13480 | 5   | 58       | 4.38313   | Wilcoxon | 3105     | 2.54577   | Brown-Forsythe |
| YAP169 | AT5G07200 | 5   | 66       | 4.31713   | Wilcoxon | 94       | 5.61808   | Brown-Forsythe |
| AGL18  | AT3G57390 | 3   | 75       | 4.23367   | Wilcoxon | 91       | 5.64237   | Brown-Forsythe |
| FLC    | AT5G10140 | 5   | 84       | 4.21793   | Wilcoxon | 2227     | 2.78758   | Brown-Forsythe |
| EMF1   | AT5G11530 | 5   | 85       | 4.21759   | Wilcoxon | 20228    | 1.29188   | Brown-Forsythe |
| ETC3   | AT4G01060 | 4   | 99       | 4.16041   | Wilcoxon | 1716     | 2.9873    | Brown-Forsythe |
| ICU2   | AT5G67100 | 5   | 11       | 4.89777   | EMMA     | 1076     | 3.40069   | Brown-Forsythe |
| GA1    | AT4G02780 | 4   | 24       | 4.36647   | EMMA     | 751      | 3.70746   | Brown-Forsythe |
| ELF6   | AT5G04240 | 5   | 58       | 3.86547   | EMMA     | 2274     | 2.78546   | Brown-Forsythe |
| YAP169 | AT5G07200 | 5   | 69       | 3.76682   | EMMA     | 94       | 5.61808   | Brown-Forsythe |
| TFL1   | AT5G03840 | 5   | 74       | 3.72861   | EMMA     | 1804     | 2.94474   | Brown-Forsythe |
| TFL2   | AT5G17690 | 5   | 93       | 3.65705   | EMMA     | 367      | 4.38413   | Brown-Forsythe |
| DDF1   | AT1G12610 | 1   | 238      | 3.1776    | EMMA     | 251      | 4.78225   | Brown-Forsythe |
| AGL18  | AT3G57390 | 3   | 244      | 3.15998   | EMMA     | 91       | 5.64237   | Brown-Forsythe |
| GASA2  | AT4G09610 | 4   | 261      | 3.118     | EMMA     | 3929     | 2.35647   | Brown-Forsythe |
| LCL1   | AT5G02840 | 5   | 302      | 3.05232   | EMMA     | 3837     | 2.3741    | Brown-Forsythe |

**Supplementary Table 45** - GWA (M) and vGWA (V) scores and ranks of trait 65: At1

| Gene      | Gene ID   | Chr | Rank (M) | Score (M) | Test (M) | Rank (V) | Score (V) | Test (V)       |
|-----------|-----------|-----|----------|-----------|----------|----------|-----------|----------------|
| AT5G49140 | AT5G49140 | 5   | 10       | 4.57388   | Wilcoxon | 6154     | 1.40568   | Brown-Forsythe |
| ATMKK5    | AT3G21220 | 3   | 12       | 4.49561   | Wilcoxon | 467      | 2.4029    | Brown-Forsythe |
| WRKY33    | AT2G38470 | 2   | 24       | 4.25497   | Wilcoxon | 292      | 2.57577   | Brown-Forsythe |
| AT4G16990 | AT4G16990 | 4   | 39       | 4.04157   | Wilcoxon | 2074     | 1.8289    | Brown-Forsythe |
| RIN4      | AT3G25070 | 3   | 63       | 3.81092   | Wilcoxon | 3064     | 1.67792   | Brown-Forsythe |
| AT5G45000 | AT5G45000 | 5   | 67       | 3.78492   | Wilcoxon | 2351     | 1.78079   | Brown-Forsythe |
| LEJ1      | AT4G34120 | 4   | 75       | 3.75061   | Wilcoxon | 1868     | 1.86807   | Brown-Forsythe |
| DND1      | AT5G15410 | 5   | 109      | 3.60025   | Wilcoxon | 6445     | 1.38796   | Brown-Forsythe |
| AT1G52900 | AT1G52900 | 1   | 114      | 3.58772   | Wilcoxon | 793      | 2.19316   | Brown-Forsythe |
| CDR1      | AT5G33340 | 5   | 287      | 3.18746   | Wilcoxon | 6326     | 1.39528   | Brown-Forsythe |
| AT5G49140 | AT5G49140 | 5   | 4        | 5.15682   | EMMA     | 6154     | 1.40568   | Brown-Forsythe |
| AT1G43180 | AT1G43180 | 1   | 23       | 4.02577   | EMMA     | 23       | 4.02577   | Brown-Forsythe |
| AT5G66640 | AT5G66640 | 5   | 43       | 3.83221   | EMMA     | 3056     | 1.67844   | Brown-Forsythe |
| ATMKK5    | AT3G21220 | 3   | 51       | 3.73997   | EMMA     | 467      | 2.4029    | Brown-Forsythe |
| AT4G19530 | AT4G19530 | 4   | 56       | 3.65164   | EMMA     | 457      | 2.41478   | Brown-Forsythe |
| AT1G52900 | AT1G52900 | 1   | 58       | 3.63487   | EMMA     | 793      | 2.19316   | Brown-Forsythe |
| WRKY33    | AT2G38470 | 2   | 59       | 3.62881   | EMMA     | 292      | 2.57577   | Brown-Forsythe |
| AT5G45000 | AT5G45000 | 5   | 70       | 3.53952   | EMMA     | 2351     | 1.78079   | Brown-Forsythe |
| PLDBETA1  | AT2G42010 | 2   | 79       | 3.45365   | EMMA     | 2000     | 1.84194   | Brown-Forsythe |
| ACD6      | AT4G14400 | 4   | 93       | 3.36124   | EMMA     | 279      | 2.59933   | Brown-Forsythe |

**Supplementary Table 46** - GWA (M) and vGWA (V) scores and ranks of trait 66: At1: CFU2

| Gene      | Gene ID   | Chr | Rank (M) | Score (M) | Test (M) | Rank (V) | Score (V) | Test (V)       |
|-----------|-----------|-----|----------|-----------|----------|----------|-----------|----------------|
| AT1G19160 | AT1G19160 | 1   | 1        | 4.79892   | Wilcoxon | 8507     | 1.34115   | Brown-Forsythe |
| AT5G66910 | AT5G66910 | 5   | 24       | 3.64585   | Wilcoxon | 147      | 2.87982   | Brown-Forsythe |
| AT5G27060 | AT5G27060 | 5   | 34       | 3.58447   | Wilcoxon | 4340     | 1.60508   | Brown-Forsythe |
| MOS4      | AT3G18165 | 3   | 45       | 3.45712   | Wilcoxon | 3529     | 1.68251   | Brown-Forsythe |
| AT5G46270 | AT5G46270 | 5   | 62       | 3.39473   | Wilcoxon | 7116     | 1.41202   | Brown-Forsythe |
| NPR4      | AT4G19660 | 4   | 64       | 3.37843   | Wilcoxon | 4176     | 1.61921   | Brown-Forsythe |
| WRKY11    | AT4G31550 | 4   | 68       | 3.36308   | Wilcoxon | 3715     | 1.66487   | Brown-Forsythe |
| RLM1      | AT1G64070 | 1   | 69       | 3.35516   | Wilcoxon | 5175     | 1.53802   | Brown-Forsythe |
| ER        | AT2G26330 | 2   | 80       | 3.30235   | Wilcoxon | 1794     | 1.9371    | Brown-Forsythe |
| AT3G26470 | AT3G26470 | 3   | 83       | 3.29355   | Wilcoxon | 170      | 2.81437   | Brown-Forsythe |
| JAZ1      | AT1G19180 | 1   | 1        | 5.17929   | EMMA     | 4921     | 1.55761   | Brown-Forsythe |
| AT1G19230 | AT1G19230 | 1   | 1        | 5.17929   | EMMA     | 2393     | 1.83256   | Brown-Forsythe |
| AT5G66910 | AT5G66910 | 5   | 16       | 4.05476   | EMMA     | 147      | 2.87982   | Brown-Forsythe |
| RLM1      | AT1G64070 | 1   | 18       | 4.02563   | EMMA     | 5175     | 1.53802   | Brown-Forsythe |
| AT5G27060 | AT5G27060 | 5   | 29       | 3.77273   | EMMA     | 4340     | 1.60508   | Brown-Forsythe |
| MOS4      | AT3G18165 | 3   | 44       | 3.69117   | EMMA     | 3529     | 1.68251   | Brown-Forsythe |
| RPP13     | AT3G46530 | 3   | 54       | 3.57418   | EMMA     | 970      | 2.169     | Brown-Forsythe |
| AT1G77920 | AT1G77920 | 1   | 56       | 3.56642   | EMMA     | 406      | 2.4955    | Brown-Forsythe |
| AT4G11210 | AT4G11210 | 4   | 94       | 3.36662   | EMMA     | 5754     | 1.49595   | Brown-Forsythe |
| ER        | AT2G26330 | 2   | 98       | 3.35      | EMMA     | 1794     | 1.9371    | Brown-Forsythe |

**Supplementary Table 47** - GWA (M) and vGWA (V) scores and ranks of trait 67: As

| Gene      | Gene ID   | Chr | Rank (M) | Score (M) | Test (M) | Rank (V) | Score (V) | Test (V)       |
|-----------|-----------|-----|----------|-----------|----------|----------|-----------|----------------|
| AT5G66640 | AT5G66640 | 5   | 12       | 4.07289   | Wilcoxon | 692      | 2.59836   | Brown-Forsythe |
| AT2G17060 | AT2G17060 | 2   | 14       | 4.03954   | Wilcoxon | 557      | 2.71715   | Brown-Forsythe |
| AT3G50950 | AT3G50950 | 3   | 29       | 3.86687   | Wilcoxon | 2950     | 1.91419   | Brown-Forsythe |
| AT3G23270 | AT3G23270 | 3   | 45       | 3.71526   | Wilcoxon | 850      | 2.49296   | Brown-Forsythe |
| AT4G16095 | AT4G16095 | 4   | 47       | 3.66962   | Wilcoxon | 288      | 3.05332   | Brown-Forsythe |
| AT4G19050 | AT4G19050 | 4   | 51       | 3.59917   | Wilcoxon | 6572     | 1.56873   | Brown-Forsythe |
| AT4G19060 | AT4G19060 | 4   | 51       | 3.59917   | Wilcoxon | 9098     | 1.41968   | Brown-Forsythe |
| EDR2      | AT4G19040 | 4   | 51       | 3.59917   | Wilcoxon | 6572     | 1.56873   | Brown-Forsythe |
| HR4       | AT3G50480 | 3   | 63       | 3.56624   | Wilcoxon | 2057     | 2.06971   | Brown-Forsythe |
| ATMKK3    | AT5G40440 | 5   | 99       | 3.40708   | Wilcoxon | 1275     | 2.2887    | Brown-Forsythe |
| AT5G66640 | AT5G66640 | 5   | 2        | 5.82719   | EMMA     | 692      | 2.59836   | Brown-Forsythe |
| AT4G16095 | AT4G16095 | 4   | 14       | 4.3661    | EMMA     | 288      | 3.05332   | Brown-Forsythe |
| AT4G11340 | AT4G11340 | 4   | 40       | 3.85508   | EMMA     | 5215     | 1.66217   | Brown-Forsythe |
| JAZ7      | AT2G34600 | 2   | 61       | 3.6394    | EMMA     | 972      | 2.42538   | Brown-Forsythe |
| AT2G17060 | AT2G17060 | 2   | 62       | 3.63546   | EMMA     | 557      | 2.71715   | Brown-Forsythe |
| AT1G63730 | AT1G63730 | 1   | 79       | 3.51266   | EMMA     | 2130     | 2.0552    | Brown-Forsythe |
| AT4G08450 | AT4G08450 | 4   | 85       | 3.46815   | EMMA     | 2134     | 2.05389   | Brown-Forsythe |
| AT1G63750 | AT1G63750 | 1   | 88       | 3.44879   | EMMA     | 2130     | 2.0552    | Brown-Forsythe |
| AT3G50950 | AT3G50950 | 3   | 94       | 3.41773   | EMMA     | 2950     | 1.91419   | Brown-Forsythe |
| AT3G24020 | AT3G24020 | 3   | 106      | 3.3816    | EMMA     | 4477     | 1.72855   | Brown-Forsythe |

**Supplementary Table 48** - GWA (M) and vGWA (V) scores and ranks of trait 68: As CFU2

| Gene      | Gene ID   | Chr | Rank (M) | Score (M) | Test (M) | Rank (V) | Score (V) | Test (V)       |
|-----------|-----------|-----|----------|-----------|----------|----------|-----------|----------------|
| AT4G13580 | AT4G13580 | 4   | 3        | 4.44123   | Wilcoxon | 6981     | 1.5523    | Brown-Forsythe |
| RLM1      | AT1G64070 | 1   | 14       | 4.00032   | Wilcoxon | 964      | 2.41428   | Brown-Forsythe |
| ATPP2-A5  | AT1G65390 | 1   | 19       | 3.9191    | Wilcoxon | 5688     | 1.64216   | Brown-Forsythe |
| LACS2     | AT1G49430 | 1   | 21       | 3.90579   | Wilcoxon | 1868     | 2.11074   | Brown-Forsythe |
| SOBER1    | AT4G22300 | 4   | 25       | 3.86091   | Wilcoxon | 232      | 3.01884   | Brown-Forsythe |
| AT1G72520 | AT1G72520 | 1   | 30       | 3.78648   | Wilcoxon | 2295     | 2.02594   | Brown-Forsythe |
| AT5G27060 | AT5G27060 | 5   | 31       | 3.77779   | Wilcoxon | 62       | 3.5793    | Brown-Forsythe |
| RDR6      | AT3G49500 | 3   | 59       | 3.53862   | Wilcoxon | 3824     | 1.81065   | Brown-Forsythe |
| AT4G12010 | AT4G12010 | 4   | 71       | 3.47602   | Wilcoxon | 590      | 2.62398   | Brown-Forsythe |
| AT1G69545 | AT1G69545 | 1   | 76       | 3.44469   | Wilcoxon | 2413     | 2.00459   | Brown-Forsythe |
| SOBER1    | AT4G22300 | 4   | 5        | 4.09743   | EMMA     | 232      | 3.01884   | Brown-Forsythe |
| LACS2     | AT1G49430 | 1   | 8        | 4.0383    | EMMA     | 1868     | 2.11074   | Brown-Forsythe |
| AT5G27060 | AT5G27060 | 5   | 23       | 3.78357   | EMMA     | 62       | 3.5793    | Brown-Forsythe |
| ATPP2-A5  | AT1G65390 | 1   | 29       | 3.70066   | EMMA     | 5688     | 1.64216   | Brown-Forsythe |
| AT1G72520 | AT1G72520 | 1   | 39       | 3.56872   | EMMA     | 2295     | 2.02594   | Brown-Forsythe |
| AT5G43730 | AT5G43730 | 5   | 44       | 3.53052   | EMMA     | 317      | 2.8771    | Brown-Forsythe |
| ATTRX3    | AT5G42980 | 5   | 47       | 3.487     | EMMA     | 3545     | 1.84371   | Brown-Forsythe |
| OCP3      | AT5G11270 | 5   | 49       | 3.47673   | EMMA     | 1572     | 2.19283   | Brown-Forsythe |
| AT1G69545 | AT1G69545 | 1   | 55       | 3.40595   | EMMA     | 2413     | 2.00459   | Brown-Forsythe |
| AT5G11250 | AT5G11250 | 5   | 78       | 3.29824   | EMMA     | 1572     | 2.19283   | Brown-Forsythe |

**Supplementary Table 49** - GWA (M) and vGWA (V) scores and ranks of trait 69: Bs

| Gene      | Gene ID   | Chr | Rank (M) | Score (M) | Test (M) | Rank (V) | Score (V) | Test (V)       |
|-----------|-----------|-----|----------|-----------|----------|----------|-----------|----------------|
| AT4G16095 | AT4G16095 | 4   | 10       | 4.41328   | Wilcoxon | 4048     | 1.58729   | Brown-Forsythe |
| AT4G23440 | AT4G23440 | 4   | 27       | 4.09883   | Wilcoxon | 3871     | 1.60467   | Brown-Forsythe |
| AT1G19160 | AT1G19160 | 1   | 30       | 4.07674   | Wilcoxon | 3743     | 1.61904   | Brown-Forsythe |
| JAZ1      | AT1G19180 | 1   | 30       | 4.07674   | Wilcoxon | 3743     | 1.61904   | Brown-Forsythe |
| MLO6      | AT1G61560 | 1   | 36       | 4.01612   | Wilcoxon | 4557     | 1.53858   | Brown-Forsythe |
| AT1G53350 | AT1G53350 | 1   | 38       | 3.94515   | Wilcoxon | 3408     | 1.6548    | Brown-Forsythe |
| ATRBOHB   | AT1G09090 | 1   | 45       | 3.93928   | Wilcoxon | 5297     | 1.47691   | Brown-Forsythe |
| AT5G43310 | AT5G43310 | 5   | 58       | 3.79667   | Wilcoxon | 1109     | 2.10283   | Brown-Forsythe |
| AT4G16095 | AT4G16095 | 4   | 67       | 3.74302   | Wilcoxon | 4048     | 1.58729   | Brown-Forsythe |
| AT1G63880 | AT1G63880 | 1   | 68       | 3.72825   | Wilcoxon | 1718     | 1.91986   | Brown-Forsythe |
| AT4G16095 | AT4G16095 | 4   | 13       | 4.41998   | EMMA     | 4048     | 1.58729   | Brown-Forsythe |
| AT1G19160 | AT1G19160 | 1   | 28       | 4.09252   | EMMA     | 3743     | 1.61904   | Brown-Forsythe |
| AT1G53350 | AT1G53350 | 1   | 37       | 3.96331   | EMMA     | 3408     | 1.6548    | Brown-Forsythe |
| ATRBOHB   | AT1G09090 | 1   | 43       | 3.8499    | EMMA     | 5297     | 1.47691   | Brown-Forsythe |
| AT3G05370 | AT3G05370 | 3   | 45       | 3.84659   | EMMA     | 2315     | 1.80678   | Brown-Forsythe |
| AT4G23440 | AT4G23440 | 4   | 53       | 3.75531   | EMMA     | 3871     | 1.60467   | Brown-Forsythe |
| AT5G43310 | AT5G43310 | 5   | 54       | 3.75196   | EMMA     | 1109     | 2.10283   | Brown-Forsythe |
| AT5G66630 | AT5G66630 | 5   | 61       | 3.66655   | EMMA     | 6672     | 1.38542   | Brown-Forsythe |
| EFR       | AT5G20480 | 5   | 82       | 3.47834   | EMMA     | 4752     | 1.52068   | Brown-Forsythe |
| MLO6      | AT1G61560 | 1   | 83       | 3.44776   | EMMA     | 4557     | 1.53858   | Brown-Forsythe |

**Supplementary Table 50** - GWA (M) and vGWA (V) scores and ranks of trait 70: Bs CFU2

| Gene      | Gene ID   | Chr | Rank (M) | Score (M) | Test (M) | Rank (V) | Score (V) | Test (V)       |
|-----------|-----------|-----|----------|-----------|----------|----------|-----------|----------------|
| ATRBOHB   | AT1G09090 | 1   | 9        | 5.07903   | Wilcoxon | 187      | 2.81339   | Brown-Forsythe |
| AT3G45860 | AT3G45860 | 3   | 21       | 4.62539   | Wilcoxon | 1993     | 1.92142   | Brown-Forsythe |
| IQD1      | AT3G09710 | 3   | 26       | 4.4954    | Wilcoxon | 7614     | 1.41715   | Brown-Forsythe |
| AT2G21030 | AT2G21030 | 2   | 31       | 4.4307    | Wilcoxon | 3201     | 1.74144   | Brown-Forsythe |
| ATMKK4    | AT1G51660 | 1   | 33       | 4.41642   | Wilcoxon | 3097     | 1.75448   | Brown-Forsythe |
| AT2G34930 | AT2G34930 | 2   | 54       | 4.33938   | Wilcoxon | 3851     | 1.675     | Brown-Forsythe |
| AT5G35180 | AT5G35180 | 5   | 57       | 4.32595   | Wilcoxon | 20       | 3.71566   | Brown-Forsythe |
| AT1G69545 | AT1G69545 | 1   | 85       | 4.22319   | Wilcoxon | 3239     | 1.73768   | Brown-Forsythe |
| AT4G36150 | AT4G36150 | 4   | 101      | 4.14919   | Wilcoxon | 896      | 2.20897   | Brown-Forsythe |
| AT5G44870 | AT5G44870 | 5   | 104      | 4.13855   | Wilcoxon | 5682     | 1.53053   | Brown-Forsythe |
| ATRBOHB   | AT1G09090 | 1   | 9        | 4.28973   | EMMA     | 187      | 2.81339   | Brown-Forsythe |
| AT2G34930 | AT2G34930 | 2   | 13       | 4.20684   | EMMA     | 3851     | 1.675     | Brown-Forsythe |
| HSP81-1   | AT5G52640 | 5   | 22       | 4.10379   | EMMA     | 22       | 4.10379   | Brown-Forsythe |
| AT2G28670 | AT2G28670 | 2   | 27       | 3.99455   | EMMA     | 3934     | 1.66489   | Brown-Forsythe |
| AT1G69545 | AT1G69545 | 1   | 28       | 3.99212   | EMMA     | 3239     | 1.73768   | Brown-Forsythe |
| AT5G46270 | AT5G46270 | 5   | 29       | 3.9514    | EMMA     | 460      | 2.47384   | Brown-Forsythe |
| AT5G17890 | AT5G17890 | 5   | 87       | 3.46148   | EMMA     | 125      | 2.995     | Brown-Forsythe |
| RPP13     | AT3G46530 | 3   | 102      | 3.37514   | EMMA     | 14955    | 1.14407   | Brown-Forsythe |
| IAR3      | AT1G51760 | 1   | 174      | 3.11228   | EMMA     | 5978     | 1.51147   | Brown-Forsythe |
| PDF1.2c   | AT5G44430 | 5   | 184      | 3.08855   | EMMA     | 184      | 3.08855   | Brown-Forsythe |

**Supplementary Table 51** - GWA (M) and vGWA (V) scores and ranks of trait 71: At2

| Gene      | Gene ID   | Chr | Rank (M) | Score (M) | Test (M) | Rank (V) | Score (V) | Test (V)       |
|-----------|-----------|-----|----------|-----------|----------|----------|-----------|----------------|
| AT1G72950 | AT1G72950 | 1   | 11       | 4.85613   | Wilcoxon | 166      | 3.4232    | Brown-Forsythe |
| NHL3      | AT5G06320 | 5   | 17       | 4.7289    | Wilcoxon | 2543     | 2.08512   | Brown-Forsythe |
| AT5G66640 | AT5G66640 | 5   | 38       | 4.39514   | Wilcoxon | 527      | 2.83158   | Brown-Forsythe |
| SGT1A     | AT4G23570 | 4   | 53       | 4.20204   | Wilcoxon | 4792     | 1.80484   | Brown-Forsythe |
| CDR1      | AT5G33340 | 5   | 88       | 3.96357   | Wilcoxon | 607      | 2.75597   | Brown-Forsythe |
| AT2G38870 | AT2G38870 | 2   | 112      | 3.83425   | Wilcoxon | 411      | 2.95084   | Brown-Forsythe |
| NPR4      | AT4G19660 | 4   | 125      | 3.7961    | Wilcoxon | 1812     | 2.24134   | Brown-Forsythe |
| AT5G49040 | AT5G49040 | 5   | 130      | 3.77479   | Wilcoxon | 2271     | 2.13785   | Brown-Forsythe |
| AGB1      | AT4G34460 | 4   | 148      | 3.71499   | Wilcoxon | 379      | 2.98169   | Brown-Forsythe |
| AT1G52660 | AT1G52660 | 1   | 156      | 3.68745   | Wilcoxon | 1804     | 2.24339   | Brown-Forsythe |
| AT5G63020 | AT5G63020 | 5   | 1        | 6.60309   | EMMA     | 476      | 2.87689   | Brown-Forsythe |
| AT5G66640 | AT5G66640 | 5   | 7        | 5.32394   | EMMA     | 527      | 2.83158   | Brown-Forsythe |
| AGB1      | AT4G34460 | 4   | 10       | 5.07307   | EMMA     | 379      | 2.98169   | Brown-Forsythe |
| NPR4      | AT4G19660 | 4   | 12       | 4.98988   | EMMA     | 1812     | 2.24134   | Brown-Forsythe |
| BAP1      | AT3G61190 | 3   | 29       | 4.45171   | EMMA     | 197      | 3.32819   | Brown-Forsythe |
| ATNFXL1   | AT1G10170 | 1   | 52       | 4.0498    | EMMA     | 356      | 3.01201   | Brown-Forsythe |
| AT2G33020 | AT2G33020 | 2   | 54       | 4.04479   | EMMA     | 1583     | 2.3022    | Brown-Forsythe |
| BON1      | AT5G61900 | 5   | 81       | 3.91437   | EMMA     | 860      | 2.57479   | Brown-Forsythe |
| AT4G13820 | AT4G13820 | 4   | 85       | 3.89682   | EMMA     | 5009     | 1.78328   | Brown-Forsythe |
| RPS4      | AT5G45250 | 5   | 90       | 3.85755   | EMMA     | 1637     | 2.28505   | Brown-Forsythe |

**Supplementary Table 52** - GWA (M) and vGWA (V) scores and ranks of trait 72: At2: CFU2

| Gene      | Gene ID   | Chr | Rank (M) | Score (M) | Test (M) | Rank (V) | Score (V) | Test (V)       |
|-----------|-----------|-----|----------|-----------|----------|----------|-----------|----------------|
| AT5G66640 | AT5G66640 | 5   | 55       | 3.64309   | Wilcoxon | 1637     | 1.91458   | Brown-Forsythe |
| AT4G19050 | AT4G19050 | 4   | 58       | 3.61456   | Wilcoxon | 570      | 2.32396   | Brown-Forsythe |
| EDR2      | AT4G19040 | 4   | 58       | 3.61456   | Wilcoxon | 570      | 2.32396   | Brown-Forsythe |
| AT2G34930 | AT2G34930 | 2   | 78       | 3.45104   | Wilcoxon | 17583    | 1.01294   | Brown-Forsythe |
| AT1G61100 | AT1G61100 | 1   | 96       | 3.34982   | Wilcoxon | 3160     | 1.65708   | Brown-Forsythe |
| OCP3      | AT5G11270 | 5   | 101      | 3.32215   | Wilcoxon | 736      | 2.21983   | Brown-Forsythe |
| AT2G15010 | AT2G15010 | 2   | 115      | 3.2633    | Wilcoxon | 6064     | 1.40999   | Brown-Forsythe |
| AT5G36930 | AT5G36930 | 5   | 119      | 3.25328   | Wilcoxon | 5909     | 1.41869   | Brown-Forsythe |
| PROPEP2   | AT5G64890 | 5   | 127      | 3.22717   | Wilcoxon | 312      | 2.58244   | Brown-Forsythe |
| AT3G50950 | AT3G50950 | 3   | 138      | 3.19277   | Wilcoxon | 1512     | 1.94467   | Brown-Forsythe |
| EDR2      | AT4G19040 | 4   | 21       | 4.11656   | EMMA     | 570      | 2.32396   | Brown-Forsythe |
| AOC4      | AT1G13280 | 1   | 54       | 3.64005   | EMMA     | 7329     | 1.3393    | Brown-Forsythe |
| AT5G66640 | AT5G66640 | 5   | 57       | 3.62269   | EMMA     | 1637     | 1.91458   | Brown-Forsythe |
| AT1G61100 | AT1G61100 | 1   | 59       | 3.61226   | EMMA     | 3160     | 1.65708   | Brown-Forsythe |
| OCP3      | AT5G11270 | 5   | 70       | 3.53168   | EMMA     | 736      | 2.21983   | Brown-Forsythe |
| AT5G44870 | AT5G44870 | 5   | 81       | 3.44641   | EMMA     | 567      | 2.32615   | Brown-Forsythe |
| RRS1      | AT5G45260 | 5   | 83       | 3.44054   | EMMA     | 2578     | 1.73799   | Brown-Forsythe |
| AT1G69550 | AT1G69550 | 1   | 96       | 3.36687   | EMMA     | 495      | 2.38971   | Brown-Forsythe |
| AT2G39430 | AT2G39430 | 2   | 108      | 3.32689   | EMMA     | 10513    | 1.20379   | Brown-Forsythe |
| AT5G36930 | AT5G36930 | 5   | 140      | 3.19907   | EMMA     | 5909     | 1.41869   | Brown-Forsythe |

**Supplementary Table 53 - GWA (M) and vGWA (V) scores and ranks of trait 73: As2**

| Gene      | Gene ID   | Chr | Rank (M) | Score (M) | Test (M) | Rank (V) | Score (V) | Test (V)       |
|-----------|-----------|-----|----------|-----------|----------|----------|-----------|----------------|
| AT4G38700 | AT4G38700 | 4   | 30       | 4.41049   | Wilcoxon | 10501    | 1.39534   | Brown-Forsythe |
| AT4G13820 | AT4G13820 | 4   | 60       | 3.99506   | Wilcoxon | 3590     | 1.97181   | Brown-Forsythe |
| AT1G69710 | AT1G69710 | 1   | 76       | 3.82345   | Wilcoxon | 4734     | 1.80875   | Brown-Forsythe |
| AT1G22900 | AT1G22900 | 1   | 77       | 3.82323   | Wilcoxon | 4804     | 1.80078   | Brown-Forsythe |
| SGT1A     | AT4G23570 | 4   | 87       | 3.75712   | Wilcoxon | 1662     | 2.42533   | Brown-Forsythe |
| AT1G72950 | AT1G72950 | 1   | 106      | 3.63602   | Wilcoxon | 786      | 2.94137   | Brown-Forsythe |
| AT3G23270 | AT3G23270 | 3   | 107      | 3.61739   | Wilcoxon | 3156     | 2.04076   | Brown-Forsythe |
| ACD6      | AT4G14400 | 4   | 112      | 3.60145   | Wilcoxon | 2101     | 2.27558   | Brown-Forsythe |
| AT5G42140 | AT5G42140 | 5   | 121      | 3.55917   | Wilcoxon | 5063     | 1.77084   | Brown-Forsythe |
| AT1G12280 | AT1G12280 | 1   | 135      | 3.49843   | Wilcoxon | 2540     | 2.16262   | Brown-Forsythe |
| AT5G66640 | AT5G66640 | 5   | 1        | 7.36257   | EMMA     | 98       | 4.59999   | Brown-Forsythe |
| NPR4      | AT4G19660 | 4   | 27       | 5.00279   | EMMA     | 289      | 3.65202   | Brown-Forsythe |
| BAP1      | AT3G61190 | 3   | 29       | 4.95259   | EMMA     | 72       | 4.86886   | Brown-Forsythe |
| AT5G41550 | AT5G41550 | 5   | 42       | 4.67348   | EMMA     | 29       | 5.71197   | Brown-Forsythe |
| AOC4      | AT1G13280 | 1   | 66       | 4.34368   | EMMA     | 228      | 3.82442   | Brown-Forsythe |
| AT1G72520 | AT1G72520 | 1   | 70       | 4.33315   | EMMA     | 17       | 6.00295   | Brown-Forsythe |
| AT5G36930 | AT5G36930 | 5   | 74       | 4.31233   | EMMA     | 816      | 2.91534   | Brown-Forsythe |
| AT3G28890 | AT3G28890 | 3   | 75       | 4.30719   | EMMA     | 24       | 5.93701   | Brown-Forsythe |
| AT4G13820 | AT4G13820 | 4   | 163      | 3.78358   | EMMA     | 3590     | 1.97181   | Brown-Forsythe |
| AT1G58390 | AT1G58390 | 1   | 175      | 3.75097   | EMMA     | 805      | 2.92324   | Brown-Forsythe |

**Supplementary Table 54 - GWA (M) and vGWA (V) scores and ranks of trait 74: As2: CFU2**

| Gene      | Gene ID   | Chr | Rank (M) | Score (M) | Test (M) | Rank (V) | Score (V) | Test (V)       |
|-----------|-----------|-----|----------|-----------|----------|----------|-----------|----------------|
| EFR       | AT5G20480 | 5   | 5        | 4.67751   | Wilcoxon | 2344     | 1.87819   | Brown-Forsythe |
| CYT1      | AT2G39770 | 2   | 20       | 3.92728   | Wilcoxon | 2032     | 1.94303   | Brown-Forsythe |
| AT4G14610 | AT4G14610 | 4   | 27       | 3.82944   | Wilcoxon | 27       | 3.82944   | Brown-Forsythe |
| AT5G23400 | AT5G23400 | 5   | 63       | 3.55016   | Wilcoxon | 687      | 2.46189   | Brown-Forsythe |
| AT3G14460 | AT3G14460 | 3   | 68       | 3.51042   | Wilcoxon | 8911     | 1.3252    | Brown-Forsythe |
| AT2G32660 | AT2G32660 | 2   | 103      | 3.36218   | Wilcoxon | 4918     | 1.56897   | Brown-Forsythe |
| LSD1      | AT4G20380 | 4   | 126      | 3.2606    | Wilcoxon | 5343     | 1.53365   | Brown-Forsythe |
| AT3G23270 | AT3G23270 | 3   | 134      | 3.22429   | Wilcoxon | 2078     | 1.93458   | Brown-Forsythe |
| AT5G46260 | AT5G46260 | 5   | 143      | 3.20083   | Wilcoxon | 436      | 2.6835    | Brown-Forsythe |
| EDR3      | AT3G60190 | 3   | 202      | 3.02868   | Wilcoxon | 2661     | 1.82689   | Brown-Forsythe |
| YSL7      | AT1G65730 | 1   | 8        | 4.512     | EMMA     | 250      | 2.96168   | Brown-Forsythe |
| CYT1      | AT2G39770 | 2   | 14       | 4.20155   | EMMA     | 2032     | 1.94303   | Brown-Forsythe |
| AT3G13650 | AT3G13650 | 3   | 31       | 3.77221   | EMMA     | 1699     | 2.01256   | Brown-Forsythe |
| AT5G23400 | AT5G23400 | 5   | 44       | 3.67826   | EMMA     | 687      | 2.46189   | Brown-Forsythe |
| OCP3      | AT5G11270 | 5   | 47       | 3.65842   | EMMA     | 2485     | 1.85503   | Brown-Forsythe |
| EFR       | AT5G20480 | 5   | 51       | 3.63768   | EMMA     | 2344     | 1.87819   | Brown-Forsythe |
| AT2G32660 | AT2G32660 | 2   | 64       | 3.54676   | EMMA     | 4918     | 1.56897   | Brown-Forsythe |
| AT1G57830 | AT1G57830 | 1   | 66       | 3.51751   | EMMA     | 3654     | 1.68698   | Brown-Forsythe |
| AT3G23270 | AT3G23270 | 3   | 68       | 3.49712   | EMMA     | 2078     | 1.93458   | Brown-Forsythe |
| AT5G49040 | AT5G49040 | 5   | 71       | 3.48929   | EMMA     | 83       | 3.42965   | Brown-Forsythe |



**Supplementary Table 55** - GWA (M) and vGWA (V) scores and ranks of trait 75: FW

| Gene | Gene ID   | Chr | Rank (M) | Score (M) | Test (M) | Rank (V) | Score (V) | Test (V)       |
|------|-----------|-----|----------|-----------|----------|----------|-----------|----------------|
| ACD6 | AT4G14400 | 4   | 108      | 3.67151   | EMMA     | 317      | 2.70339   | Brown-Forsythe |

**Supplementary Table 56** - GWA (M) and vGWA (V) scores and ranks of trait 76: DW

| Gene | Gene ID   | Chr | Rank (M) | Score (M) | Test (M) | Rank (V) | Score (V) | Test (V)       |
|------|-----------|-----|----------|-----------|----------|----------|-----------|----------------|
| ACD6 | AT4G14400 | 4   | 163      | 4.07261   | Wilcoxon | 597      | 2.53351   | Brown-Forsythe |
| ACD6 | AT4G14400 | 4   | 21       | 4.71524   | EMMA     | 597      | 2.53351   | Brown-Forsythe |

**Supplementary Table 57** - GWA (M) and vGWA (V) scores and ranks of trait 80: LN10

| Gene        | Gene ID   | Chr | Rank (M) | Score (M) | Test (M) | Rank (V) | Score (V) | Test (V)       |
|-------------|-----------|-----|----------|-----------|----------|----------|-----------|----------------|
| ATH1        | AT4G32980 | 4   | 1        | 10.7383   | Wilcoxon | 196      | 5.73855   | Brown-Forsythe |
| AGL17       | AT2G22630 | 2   | 5        | 9.96091   | Wilcoxon | 307      | 5.3338    | Brown-Forsythe |
| DOG1        | AT5G45830 | 5   | 6        | 9.86254   | Wilcoxon | 29       | 7.56108   | Brown-Forsythe |
| SVP         | AT2G22540 | 2   | 8        | 9.73402   | Wilcoxon | 226      | 5.61853   | Brown-Forsythe |
| sim-to-VRN1 | AT4G33280 | 4   | 15       | 9.52932   | Wilcoxon | 92       | 6.37853   | Brown-Forsythe |
| DFL2        | AT4G03400 | 4   | 41       | 8.60168   | Wilcoxon | 97       | 6.35557   | Brown-Forsythe |
| ATARP4      | AT1G18450 | 1   | 70       | 7.9712    | Wilcoxon | 1651     | 4.10412   | Brown-Forsythe |
| GASA5       | AT3G02885 | 3   | 88       | 7.80368   | Wilcoxon | 218      | 5.65129   | Brown-Forsythe |
| ATGID1B     | AT3G63010 | 3   | 108      | 7.61248   | Wilcoxon | 3033     | 3.62857   | Brown-Forsythe |
| SPA4        | AT1G53090 | 1   | 117      | 7.54299   | Wilcoxon | 430      | 5.09252   | Brown-Forsythe |
| DOG1        | AT5G45830 | 5   | 7        | 4.96507   | EMMA     | 29       | 7.56108   | Brown-Forsythe |
| DFL1        | AT5G54510 | 5   | 10       | 4.75953   | EMMA     | 10599    | 2.57239   | Brown-Forsythe |
| sim-to-VRN1 | AT4G33280 | 4   | 11       | 4.72347   | EMMA     | 92       | 6.37853   | Brown-Forsythe |
| ATH1        | AT4G32980 | 4   | 23       | 4.37626   | EMMA     | 196      | 5.73855   | Brown-Forsythe |
| SPA4        | AT1G53090 | 1   | 24       | 4.27912   | EMMA     | 430      | 5.09252   | Brown-Forsythe |
| SPL4        | AT1G53160 | 1   | 24       | 4.27912   | EMMA     | 430      | 5.09252   | Brown-Forsythe |
| FT          | AT1G65480 | 1   | 36       | 4.16855   | EMMA     | 918      | 4.56793   | Brown-Forsythe |
| CIP7        | AT4G27430 | 4   | 94       | 3.75715   | EMMA     | 19797    | 2.02187   | Brown-Forsythe |
| SVP         | AT2G22540 | 2   | 102      | 3.72526   | EMMA     | 226      | 5.61853   | Brown-Forsythe |
| AGL17       | AT2G22630 | 2   | 110      | 3.68391   | EMMA     | 307      | 5.3338    | Brown-Forsythe |

**Supplementary Table 58 - GWA (M) and vGWA (V) scores and ranks of trait 81: LN16**

| Gene        | Gene ID   | Chr | Rank (M) | Score (M) | Test (M) | Rank (V) | Score (V) | Test (V)       |
|-------------|-----------|-----|----------|-----------|----------|----------|-----------|----------------|
| ATARP4      | AT1G18450 | 1   | 9        | 10.8254   | Wilcoxon | 406      | 6.99885   | Brown-Forsythe |
| sim-to-VRN1 | AT4G33280 | 4   | 25       | 10.0518   | Wilcoxon | 7108     | 3.04935   | Brown-Forsythe |
| ETC3        | AT4G01060 | 4   | 34       | 9.90458   | Wilcoxon | 235      | 7.93987   | Brown-Forsythe |
| AGL17       | AT2G22630 | 2   | 35       | 9.8285    | Wilcoxon | 61       | 9.57657   | Brown-Forsythe |
| ATH1        | AT4G32980 | 4   | 42       | 9.81923   | Wilcoxon | 1732     | 4.81402   | Brown-Forsythe |
| SVP         | AT2G22540 | 2   | 88       | 9.12519   | Wilcoxon | 137      | 8.72269   | Brown-Forsythe |
| DFL2        | AT4G03400 | 4   | 94       | 8.99851   | Wilcoxon | 1198     | 5.39183   | Brown-Forsythe |
| FLC         | AT5G10140 | 5   | 154      | 8.28101   | Wilcoxon | 1076     | 5.5463    | Brown-Forsythe |
| YAP169      | AT5G07200 | 5   | 162      | 8.23112   | Wilcoxon | 874      | 5.84203   | Brown-Forsythe |
| SPA2        | AT4G11110 | 4   | 199      | 8.04169   | Wilcoxon | 3082     | 3.9956    | Brown-Forsythe |
| ETC3        | AT4G01060 | 4   | 2        | 5.5663    | EMMA     | 235      | 7.93987   | Brown-Forsythe |
| sim-to-FRI  | AT4G00690 | 4   | 29       | 4.27582   | EMMA     | 127      | 8.82991   | Brown-Forsythe |
| DFL2        | AT4G00650 | 4   | 29       | 4.27582   | EMMA     | 5016     | 3.41872   | Brown-Forsythe |
| sim-to-SRR1 | AT4G03400 | 4   | 41       | 4.05769   | EMMA     | 1198     | 5.39183   | Brown-Forsythe |
| GA1         | AT5G59570 | 5   | 92       | 3.65582   | EMMA     | 4694     | 3.49108   | Brown-Forsythe |
| YAP169      | AT5G59560 | 5   | 92       | 3.65582   | EMMA     | 4694     | 3.49108   | Brown-Forsythe |
| sim-to-VRN1 | AT4G02780 | 4   | 100      | 3.61767   | EMMA     | 1931     | 4.65843   | Brown-Forsythe |
| FPF1        | AT5G07200 | 5   | 118      | 3.52327   | EMMA     | 874      | 5.84203   | Brown-Forsythe |
| ESD4        | AT4G33280 | 4   | 137      | 3.45341   | EMMA     | 7108     | 3.04935   | Brown-Forsythe |
| PCL1        | AT5G24860 | 5   | 182      | 3.26357   | EMMA     | 2752     | 4.15135   | Brown-Forsythe |

**Supplementary Table 59 - GWA (M) and vGWA (V) scores and ranks of trait 82: LN22**

| Gene        | Gene ID   | Chr | Rank (M) | Score (M) | Test (M) | Rank (V) | Score (V) | Test (V)       |
|-------------|-----------|-----|----------|-----------|----------|----------|-----------|----------------|
| ATARP4      | AT1G18450 | 1   | 5        | 10.2239   | Wilcoxon | 384      | 6.64017   | Brown-Forsythe |
| AGL17       | AT2G22630 | 2   | 10       | 9.78994   | Wilcoxon | 105      | 8.09152   | Brown-Forsythe |
| DFL2        | AT4G03400 | 4   | 13       | 9.67532   | Wilcoxon | 48       | 9.09848   | Brown-Forsythe |
| ETC3        | AT4G01060 | 4   | 24       | 9.38415   | Wilcoxon | 643      | 6.01769   | Brown-Forsythe |
| ATGA2OX7    | AT1G50960 | 1   | 25       | 9.36401   | Wilcoxon | 150      | 7.71517   | Brown-Forsythe |
| SVP         | AT2G22540 | 2   | 54       | 8.97539   | Wilcoxon | 105      | 8.09152   | Brown-Forsythe |
| ATH1        | AT4G32980 | 4   | 56       | 8.96646   | Wilcoxon | 390      | 6.61824   | Brown-Forsythe |
| sim-to-VRN1 | AT4G33280 | 4   | 97       | 8.54422   | Wilcoxon | 1211     | 5.20285   | Brown-Forsythe |
| FRI         | AT4G00650 | 4   | 137      | 8.26798   | Wilcoxon | 788      | 5.76969   | Brown-Forsythe |
| DOG1        | AT5G45830 | 5   | 179      | 7.91885   | Wilcoxon | 1171     | 5.23283   | Brown-Forsythe |
| ETC3        | AT4G01060 | 4   | 4        | 5.30509   | EMMA     | 643      | 6.01769   | Brown-Forsythe |
| ATGA2OX7    | AT1G50960 | 1   | 18       | 4.70901   | EMMA     | 150      | 7.71517   | Brown-Forsythe |
| DOG1        | AT5G45830 | 5   | 29       | 4.37363   | EMMA     | 1171     | 5.23283   | Brown-Forsythe |
| DFL2        | AT4G03400 | 4   | 37       | 4.19623   | EMMA     | 48       | 9.09848   | Brown-Forsythe |
| GA1         | AT4G02780 | 4   | 38       | 4.18079   | EMMA     | 327      | 6.85181   | Brown-Forsythe |
| sim-to-ESD4 | AT4G00690 | 4   | 47       | 4.0692    | EMMA     | 451      | 6.45105   | Brown-Forsythe |
| FRI         | AT4G00650 | 4   | 47       | 4.0692    | EMMA     | 788      | 5.76969   | Brown-Forsythe |
| FLC         | AT5G10140 | 5   | 52       | 3.96494   | EMMA     | 6        | 11.5397   | Brown-Forsythe |
| CRY1        | AT4G08920 | 4   | 67       | 3.86083   | EMMA     | 53       | 8.94445   | Brown-Forsythe |
| ATHB51      | AT5G03790 | 5   | 69       | 3.8371    | EMMA     | 6201     | 3.37727   | Brown-Forsythe |

**Supplementary Table 60** - GWA (M) and vGWA (V) scores and ranks of trait 158: Silique 16

| Gene      | Gene ID   | Chr | Rank (M) | Score (M) | Test (M) | Rank (V) | Score (V) | Test (V)       |
|-----------|-----------|-----|----------|-----------|----------|----------|-----------|----------------|
| GA5       | AT4G25420 | 4   | 28       | 4.0222    | Wilcoxon | 18970    | 1.11379   | Brown-Forsythe |
| CUL4      | AT5G46210 | 5   | 34       | 3.95142   | Wilcoxon | 344      | 3.07096   | Brown-Forsythe |
| RGA1      | AT2G01570 | 2   | 54       | 3.73416   | Wilcoxon | 4021     | 1.77721   | Brown-Forsythe |
| ATMYB65   | AT3G11440 | 3   | 64       | 3.65914   | Wilcoxon | 4162     | 1.76877   | Brown-Forsythe |
| SPY       | AT3G11540 | 3   | 64       | 3.65914   | Wilcoxon | 836      | 2.52117   | Brown-Forsythe |
| AGL15     | AT5G13790 | 5   | 88       | 3.51928   | Wilcoxon | 2064     | 2.07794   | Brown-Forsythe |
| AGL14     | AT4G11880 | 4   | 91       | 3.50155   | Wilcoxon | 1011     | 2.43534   | Brown-Forsythe |
| FUS3      | AT3G26790 | 3   | 94       | 3.49514   | Wilcoxon | 13715    | 1.25722   | Brown-Forsythe |
| LIP1      | AT5G64813 | 5   | 99       | 3.48472   | Wilcoxon | 388      | 3.00956   | Brown-Forsythe |
| SNZ       | AT2G39250 | 2   | 109      | 3.45798   | Wilcoxon | 1438     | 2.27417   | Brown-Forsythe |
| FLK       | AT3G04610 | 3   | 8        | 4.89322   | EMMA     | 2792     | 1.96129   | Brown-Forsythe |
| AGL15     | AT5G13790 | 5   | 11       | 4.86601   | EMMA     | 2064     | 2.07794   | Brown-Forsythe |
| GA5       | AT4G25420 | 4   | 19       | 4.24695   | EMMA     | 18970    | 1.11379   | Brown-Forsythe |
| DFL1      | AT5G54510 | 5   | 35       | 3.96054   | EMMA     | 758      | 2.56297   | Brown-Forsythe |
| AGL14     | AT4G11880 | 4   | 53       | 3.69279   | EMMA     | 1011     | 2.43534   | Brown-Forsythe |
| AT3G04510 | AT3G04510 | 3   | 57       | 3.65124   | EMMA     | 934      | 2.4696    | Brown-Forsythe |
| ATMYB65   | AT3G11440 | 3   | 63       | 3.56935   | EMMA     | 4162     | 1.76877   | Brown-Forsythe |
| SPY       | AT3G11540 | 3   | 63       | 3.56935   | EMMA     | 836      | 2.52117   | Brown-Forsythe |
| CUL4      | AT5G46210 | 5   | 64       | 3.56468   | EMMA     | 344      | 3.07096   | Brown-Forsythe |
| ATHXK1    | AT4G29130 | 4   | 91       | 3.44387   | EMMA     | 474      | 2.81581   | Brown-Forsythe |

**Supplementary Table 61** - GWA (M) and vGWA (V) scores and ranks of trait 159: Silique 22

| Gene       | Gene ID   | Chr | Rank (M) | Score (M) | Test (M) | Rank (V) | Score (V) | Test (V)       |
|------------|-----------|-----|----------|-----------|----------|----------|-----------|----------------|
| DDF1       | AT1G12610 | 1   | 15       | 5.9721    | Wilcoxon | 3122     | 1.89109   | Brown-Forsythe |
| CIP1       | AT5G41790 | 5   | 31       | 5.9721    | Wilcoxon | 3024     | 1.90832   | Brown-Forsythe |
| AP2        | AT4G36920 | 4   | 41       | 5.39903   | Wilcoxon | 1815     | 2.15319   | Brown-Forsythe |
| FCA        | AT4G16280 | 4   | 66       | 5.25912   | Wilcoxon | 1240     | 2.32571   | Brown-Forsythe |
| PHYD       | AT4G16250 | 4   | 66       | 5.25912   | Wilcoxon | 1240     | 2.32571   | Brown-Forsythe |
| AMP1       | AT3G54720 | 3   | 206      | 4.62771   | Wilcoxon | 800      | 2.50882   | Brown-Forsythe |
| HY5        | AT5G11260 | 5   | 210      | 4.60944   | Wilcoxon | 553      | 2.64642   | Brown-Forsythe |
| YAP169     | AT5G07200 | 5   | 222      | 4.58577   | Wilcoxon | 307      | 2.96771   | Brown-Forsythe |
| HAP2A      | AT5G12840 | 5   | 240      | 4.55483   | Wilcoxon | 801      | 2.50538   | Brown-Forsythe |
| VIP1       | AT1G43700 | 1   | 376      | 4.30731   | Wilcoxon | 3004     | 1.9095    | Brown-Forsythe |
| GA1        | AT4G02780 | 4   | 8        | 4.60044   | EMMA     | 2421     | 2.00567   | Brown-Forsythe |
| ICU2       | AT5G67100 | 5   | 23       | 4.09424   | EMMA     | 3763     | 1.79941   | Brown-Forsythe |
| DFL1       | AT5G54510 | 5   | 33       | 3.89471   | EMMA     | 5402     | 1.63757   | Brown-Forsythe |
| TCH2       | AT5G37770 | 5   | 46       | 3.81935   | EMMA     | 5518     | 1.62681   | Brown-Forsythe |
| DDF1       | AT1G12610 | 1   | 51       | 3.74794   | EMMA     | 3122     | 1.89109   | Brown-Forsythe |
| SPL4       | AT1G53160 | 1   | 58       | 3.7192    | EMMA     | 545      | 2.64769   | Brown-Forsythe |
| SEPALLATA4 | AT2G03710 | 2   | 77       | 3.68256   | EMMA     | 2513     | 1.98143   | Brown-Forsythe |
| AT3G21320  | AT3G21320 | 3   | 85       | 3.59299   | EMMA     | 2983     | 1.91      | Brown-Forsythe |
| ELF4       | AT2G40080 | 2   | 153      | 3.19364   | EMMA     | 1230     | 2.3346    | Brown-Forsythe |
| CRY1       | AT4G08920 | 4   | 171      | 3.13874   | EMMA     | 2772     | 1.95188   | Brown-Forsythe |

**Supplementary Table 62** - GWA (M) and vGWA (V) scores and ranks of trait 163: Germ 22

| Gene        | Gene ID   | Chr | Rank (M) | Score (M) | Test (M) | Rank (V) | Score (V) | Test (V)       |
|-------------|-----------|-----|----------|-----------|----------|----------|-----------|----------------|
| EER5        | AT2G19560 | 2   | 1        | 6.89057   | Wilcoxon | 171      | 3.29939   | Brown-Forsythe |
| SCD1        | AT1G49040 | 1   | 9        | 4.85116   | Wilcoxon | 39       | 3.85964   | Brown-Forsythe |
| FT          | AT1G65480 | 1   | 22       | 4.17583   | Wilcoxon | 2145     | 2.05289   | Brown-Forsythe |
| SEPALLATA3  | AT1G24260 | 1   | 24       | 4.15532   | Wilcoxon | 5        | 5.04646   | Brown-Forsythe |
| SPA2        | AT4G11110 | 4   | 37       | 4.00096   | Wilcoxon | 351      | 2.89198   | Brown-Forsythe |
| RGL1        | AT1G66350 | 1   | 39       | 3.99895   | Wilcoxon | 3258     | 1.85072   | Brown-Forsythe |
| EZA1        | AT4G02020 | 4   | 48       | 3.82397   | Wilcoxon | 38       | 3.8598    | Brown-Forsythe |
| sim-to-DOG1 | AT4G18660 | 4   | 68       | 3.73996   | Wilcoxon | 7530     | 1.47331   | Brown-Forsythe |
| LHY         | AT1G01060 | 1   | 74       | 3.70853   | Wilcoxon | 154      | 3.33482   | Brown-Forsythe |
| EER5        | AT2G19560 | 2   | 1        | 5.5983    | EMMA     | 171      | 3.29939   | Brown-Forsythe |
| SCD1        | AT1G49040 | 1   | 4        | 4.95534   | EMMA     | 39       | 3.85964   | Brown-Forsythe |
| SEPALLATA3  | AT1G24260 | 1   | 5        | 4.77771   | EMMA     | 5        | 5.04646   | Brown-Forsythe |
| SPA2        | AT4G11110 | 4   | 12       | 4.36052   | EMMA     | 351      | 2.89198   | Brown-Forsythe |
| FHY1        | AT2G37678 | 2   | 27       | 4.01556   | EMMA     | 4        | 5.45331   | Brown-Forsythe |
| TIC         | AT3G22380 | 3   | 29       | 3.99637   | EMMA     | 29       | 4.06876   | Brown-Forsythe |
| HLS1        | AT4G37580 | 4   | 34       | 3.975     | EMMA     | 64       | 3.68967   | Brown-Forsythe |
| EZA1        | AT4G02020 | 4   | 45       | 3.82084   | EMMA     | 38       | 3.8598    | Brown-Forsythe |
| LHY         | AT1G01060 | 1   | 76       | 3.57447   | EMMA     | 154      | 3.33482   | Brown-Forsythe |
| FRS1        | AT4G19990 | 4   | 85       | 3.50848   | EMMA     | 151      | 3.33993   | Brown-Forsythe |

**Supplementary Table 63** - GWA (M) and vGWA (V) scores and ranks of trait 164: Width 10

| Gene | Gene ID   | Chr | Rank (M) | Score (M) | Test (M) | Rank (V) | Score (V) | Test (V)       |
|------|-----------|-----|----------|-----------|----------|----------|-----------|----------------|
| TET3 | AT3G45600 | 3   | 2        | 7.83245   | Wilcoxon | 3358     | 2.0686    | Brown-Forsythe |
| SAB  | AT1G58250 | 1   | 10       | 6.09059   | Wilcoxon | 2868     | 2.15045   | Brown-Forsythe |
| BIN4 | AT5G24630 | 5   | 106      | 4.17852   | Wilcoxon | 3355     | 2.06912   | Brown-Forsythe |
| CCH  | AT3G56240 | 3   | 282      | 3.60952   | Wilcoxon | 2812     | 2.15914   | Brown-Forsythe |
| TIP1 | AT5G20350 | 5   | 424      | 3.3769    | Wilcoxon | 147      | 3.6826    | Brown-Forsythe |
| REM1 | AT4G31610 | 4   | 493      | 3.28949   | Wilcoxon | 118      | 3.78288   | Brown-Forsythe |
| TET3 | AT3G45600 | 3   | 5        | 6.99357   | EMMA     | 3358     | 2.0686    | Brown-Forsythe |
| SAB  | AT1G58250 | 1   | 38       | 4.13247   | EMMA     | 2868     | 2.15045   | Brown-Forsythe |

**Supplementary Table 64** - GWA (M) and vGWA (V) scores and ranks of trait 165: Width 16

| Gene | Gene ID   | Chr | Rank (M) | Score (M) | Test (M) | Rank (V) | Score (V) | Test (V)       |
|------|-----------|-----|----------|-----------|----------|----------|-----------|----------------|
| WUS  | AT2G17950 | 2   | 13       | 4.63002   | Wilcoxon | 22164    | 1.13848   | Brown-Forsythe |
| CCH  | AT3G56240 | 3   | 63       | 4.00711   | Wilcoxon | 232      | 3.36007   | Brown-Forsythe |
| CPC  | AT2G46410 | 2   | 133      | 3.65904   | Wilcoxon | 1872     | 2.32503   | Brown-Forsythe |
| BAM1 | AT5G65700 | 5   | 164      | 3.51707   | Wilcoxon | 19901    | 1.19012   | Brown-Forsythe |
| BIN4 | AT5G24630 | 5   | 202      | 3.43691   | Wilcoxon | 516      | 2.94741   | Brown-Forsythe |
| BAM2 | AT3G49670 | 3   | 245      | 3.35871   | Wilcoxon | 3942     | 1.96774   | Brown-Forsythe |
| TWD1 | AT3G21640 | 3   | 251      | 3.35373   | Wilcoxon | 727      | 2.78206   | Brown-Forsythe |
| ELO3 | AT5G50320 | 5   | 17       | 4.34187   | EMMA     | 14530    | 1.34022   | Brown-Forsythe |
| CCH  | AT3G56240 | 3   | 23       | 4.18171   | EMMA     | 232      | 3.36007   | Brown-Forsythe |
| CPC  | AT2G46410 | 2   | 50       | 3.72607   | EMMA     | 1872     | 2.32503   | Brown-Forsythe |
| BIN4 | AT5G24630 | 5   | 90       | 3.41288   | EMMA     | 516      | 2.94741   | Brown-Forsythe |
| WUS  | AT2G17950 | 2   | 260      | 2.89848   | EMMA     | 22164    | 1.13848   | Brown-Forsythe |

**Supplementary Table 65** - GWA (M) and vGWA (V) scores and ranks of trait 166: Width 22

| Gene  | Gene ID   | Chr | Rank (M) | Score (M) | Test (M) | Rank (V) | Score (V) | Test (V)       |
|-------|-----------|-----|----------|-----------|----------|----------|-----------|----------------|
| ELO1  | AT3G11220 | 3   | 7        | 4.42509   | Wilcoxon | 88       | 3.45032   | Brown-Forsythe |
| SHR   | AT4G37650 | 4   | 234      | 3.13121   | Wilcoxon | 6977     | 1.50395   | Brown-Forsythe |
| ZCW32 | AT1G59640 | 1   | 352      | 2.94932   | Wilcoxon | 5746     | 1.58302   | Brown-Forsythe |
| SMP2  | AT4G37120 | 4   | 356      | 2.93903   | Wilcoxon | 5664     | 1.58791   | Brown-Forsythe |
| BIN4  | AT5G24630 | 5   | 357      | 2.93893   | Wilcoxon | 1785     | 2.06544   | Brown-Forsythe |
| SHD   | AT4G24190 | 4   | 403      | 2.88857   | Wilcoxon | 2870     | 1.87163   | Brown-Forsythe |
| ELO1  | AT3G11220 | 3   | 52       | 3.4997    | EMMA     | 88       | 3.45032   | Brown-Forsythe |
| SHR   | AT4G37650 | 4   | 291      | 2.79222   | EMMA     | 6977     | 1.50395   | Brown-Forsythe |
| MSL3  | AT1G58200 | 1   | 363      | 2.70024   | EMMA     | 1479     | 2.13985   | Brown-Forsythe |
| SHR   | AT4G37650 | 4   | 375      | 2.68857   | EMMA     | 6977     | 1.50395   | Brown-Forsythe |
| OLEO2 | AT5G40420 | 5   | 382      | 2.67872   | EMMA     | 28       | 3.86851   | Brown-Forsythe |

**Supplementary Table 66** - GWA (M) and vGWA (V) scores and ranks of trait 173: Leaf serr 10

| Gene      | Gene ID   | Chr | Rank (M) | Score (M) | Test (M) | Rank (V) | Score (V) | Test (V)       |
|-----------|-----------|-----|----------|-----------|----------|----------|-----------|----------------|
| AT4G18390 | AT4G18390 | 4   | 24       | 5.27395   | Wilcoxon | 2467     | 1.90772   | Brown-Forsythe |
| PAS1      | AT3G54010 | 3   | 39       | 5.05486   | Wilcoxon | 2608     | 1.88206   | Brown-Forsythe |
| PTF1      | AT3G02150 | 3   | 91       | 4.56632   | Wilcoxon | 11499    | 1.26279   | Brown-Forsythe |
| SE        | AT2G27100 | 2   | 196      | 4.17463   | Wilcoxon | 1122     | 2.22147   | Brown-Forsythe |
| RPS15AD   | AT3G46040 | 3   | 197      | 4.17441   | Wilcoxon | 4739     | 1.6307    | Brown-Forsythe |
| ATS       | AT5G42630 | 5   | 205      | 4.15439   | Wilcoxon | 5437     | 1.5741    | Brown-Forsythe |
| MIR173    | AT3G23125 | 3   | 258      | 4.05334   | Wilcoxon | 258      | 4.05334   | Brown-Forsythe |
| ATL5      | AT3G25520 | 3   | 368      | 3.85108   | Wilcoxon | 2091     | 1.96603   | Brown-Forsythe |
| CYC1      | AT4G37490 | 4   | 376      | 3.84515   | Wilcoxon | 14426    | 1.16374   | Brown-Forsythe |
| RIK       | AT3G29390 | 3   | 395      | 3.81904   | Wilcoxon | 9830     | 1.33158   | Brown-Forsythe |
| AT4G18390 | AT4G18390 | 4   | 14       | 4.07285   | EMMA     | 2467     | 1.90772   | Brown-Forsythe |
| RPS15AD   | AT3G46040 | 3   | 92       | 3.25956   | EMMA     | 4739     | 1.6307    | Brown-Forsythe |
| TAS1A     | AT2G27400 | 2   | 204      | 2.95069   | EMMA     | 204      | 2.95069   | Brown-Forsythe |
| SE        | AT2G27100 | 2   | 208      | 2.94344   | EMMA     | 1122     | 2.22147   | Brown-Forsythe |
| ATS       | AT5G42630 | 5   | 221      | 2.92632   | EMMA     | 5437     | 1.5741    | Brown-Forsythe |
| AXR1      | AT1G05180 | 1   | 235      | 2.90649   | EMMA     | 2015     | 1.98904   | Brown-Forsythe |
| AT1G33140 | AT1G33140 | 1   | 269      | 2.8609    | EMMA     | 1077     | 2.23989   | Brown-Forsythe |
| AT1G29890 | AT1G29890 | 1   | 299      | 2.80461   | EMMA     | 144      | 3.01333   | Brown-Forsythe |
| PAS1      | AT3G54010 | 3   | 314      | 2.79022   | EMMA     | 2608     | 1.88206   | Brown-Forsythe |
| PTF1      | AT3G02150 | 3   | 371      | 2.71172   | EMMA     | 11499    | 1.26279   | Brown-Forsythe |

**Supplementary Table 67** - GWA (M) and vGWA (V) scores and ranks of trait 174: Leaf serr 16

| Gene      | Gene ID   | Chr | Rank (M) | Score (M) | Test (M) | Rank (V) | Score (V) | Test (V)       |
|-----------|-----------|-----|----------|-----------|----------|----------|-----------|----------------|
| AGO1      | AT1G48410 | 1   | 84       | 3.95945   | Wilcoxon | 21946    | 1.2292    | Brown-Forsythe |
| ANAC065   | AT3G56560 | 3   | 129      | 3.78797   | Wilcoxon | 3284     | 2.23167   | Brown-Forsythe |
| ANAC082   | AT5G09330 | 5   | 274      | 3.40502   | Wilcoxon | 607      | 3.1074    | Brown-Forsythe |
| AT1G29890 | AT1G29890 | 1   | 280      | 3.39571   | Wilcoxon | 1058     | 2.80565   | Brown-Forsythe |
| TCP3      | AT1G53230 | 1   | 295      | 3.36742   | Wilcoxon | 3371     | 2.21832   | Brown-Forsythe |
| AT4G32700 | AT4G32700 | 4   | 402      | 3.20388   | Wilcoxon | 4042     | 2.12273   | Brown-Forsythe |
| TCP4      | AT3G15030 | 3   | 481      | 3.11765   | Wilcoxon | 6030     | 1.92521   | Brown-Forsythe |
| CYP72C1   | AT1G17060 | 1   | 498      | 3.10215   | Wilcoxon | 3119     | 2.25445   | Brown-Forsythe |
| RIK       | AT3G29390 | 3   | 145      | 3.13165   | EMMA     | 2735     | 2.31421   | Brown-Forsythe |
| ANAC013   | AT1G32870 | 1   | 155      | 3.08794   | EMMA     | 1        | 8.67585   | Brown-Forsythe |
| ANAC065   | AT3G56560 | 3   | 204      | 2.94685   | EMMA     | 3284     | 2.23167   | Brown-Forsythe |
| CYP72C1   | AT1G17060 | 1   | 205      | 2.93996   | EMMA     | 3119     | 2.25445   | Brown-Forsythe |
| AGO1      | AT1G48410 | 1   | 230      | 2.88852   | EMMA     | 21946    | 1.2292    | Brown-Forsythe |
| ANAC079   | AT5G07680 | 5   | 264      | 2.8361    | EMMA     | 2214     | 2.42188   | Brown-Forsythe |
| ANAC074   | AT4G28530 | 4   | 288      | 2.80952   | EMMA     | 2647     | 2.32946   | Brown-Forsythe |
| AT1G33140 | AT1G33140 | 1   | 306      | 2.78485   | EMMA     | 233      | 3.74141   | Brown-Forsythe |
| CAS1      | AT2G07050 | 2   | 340      | 2.75006   | EMMA     | 3705     | 2.16549   | Brown-Forsythe |

**Supplementary Table 68** - GWA (M) and vGWA (V) scores and ranks of trait 175: Leaf serr 22

| Gene         | Gene ID   | Chr | Rank (M) | Score (M) | Test (M) | Rank (V) | Score (V) | Test (V)       |
|--------------|-----------|-----|----------|-----------|----------|----------|-----------|----------------|
| KNAT3        | AT5G25220 | 5   | 62       | 4.30933   | Wilcoxon | 1307     | 2.61596   | Brown-Forsythe |
| STV1         | AT3G53020 | 3   | 76       | 4.15559   | Wilcoxon | 2813     | 2.16822   | Brown-Forsythe |
| MIR164       | AT5G01747 | 5   | 81       | 4.07561   | Wilcoxon | 81       | 4.07561   | Brown-Forsythe |
| RIK          | AT3G29390 | 3   | 82       | 4.05479   | Wilcoxon | 6278     | 1.73208   | Brown-Forsythe |
| ANAC074      | AT4G28530 | 4   | 129      | 3.85693   | Wilcoxon | 428      | 3.25967   | Brown-Forsythe |
| NPH4         | AT5G20730 | 5   | 375      | 3.35214   | Wilcoxon | 2307     | 2.274     | Brown-Forsythe |
| KNAT3        | AT5G25220 | 5   | 4        | 5.0011    | EMMA     | 1307     | 2.61596   | Brown-Forsythe |
| STV1         | AT3G53020 | 3   | 11       | 4.36132   | EMMA     | 2813     | 2.16822   | Brown-Forsythe |
| ANAC074      | AT4G28530 | 4   | 66       | 3.42028   | EMMA     | 428      | 3.25967   | Brown-Forsythe |
| ANAC103      | AT5G64060 | 5   | 100      | 3.24533   | EMMA     | 13870    | 1.30539   | Brown-Forsythe |
| MIR164       | AT5G01747 | 5   | 104      | 3.22861   | EMMA     | 104      | 3.22861   | Brown-Forsythe |
| CUC1         | AT3G15170 | 3   | 281      | 2.79598   | EMMA     | 1072     | 2.72444   | Brown-Forsythe |
| MIR160       | AT5G46845 | 5   | 408      | 2.63898   | EMMA     | 408      | 2.63898   | Brown-Forsythe |
| AGO1         | AT1G48410 | 1   | 416      | 2.62825   | EMMA     | 2811     | 2.16862   | Brown-Forsythe |
| ANAC104/XND1 | AT5G64530 | 5   | 436      | 2.60966   | EMMA     | 414      | 3.27534   | Brown-Forsythe |
| AT1G29890    | AT1G29890 | 1   | 444      | 2.60077   | EMMA     | 245      | 3.61462   | Brown-Forsythe |

**Supplementary Table 69** - GWA (M) and vGWA (V) scores and ranks of trait 182: Hypocotyl length

| Gene    | Gene ID   | Chr | Rank (M) | Score (M) | Test (M) | Rank (V) | Score (V) | Test (V)       |
|---------|-----------|-----|----------|-----------|----------|----------|-----------|----------------|
| LSH1    | AT5G28490 | 5   | 28       | 5.12859   | Wilcoxon | 5947     | 1.49923   | Brown-Forsythe |
| HFR1    | AT1G02340 | 1   | 29       | 5.0957    | Wilcoxon | 11000    | 1.27509   | Brown-Forsythe |
| CYCD1;1 | AT1G70210 | 1   | 96       | 4.55502   | Wilcoxon | 2133     | 1.88787   | Brown-Forsythe |
| ATPSK4  | AT3G49780 | 3   | 112      | 4.46003   | Wilcoxon | 2744     | 1.78508   | Brown-Forsythe |
| DFL1    | AT5G54510 | 5   | 120      | 4.4513    | Wilcoxon | 2122     | 1.88922   | Brown-Forsythe |
| HLS1    | AT4G37580 | 4   | 148      | 4.32914   | Wilcoxon | 2651     | 1.79967   | Brown-Forsythe |
| DOG1    | AT5G45830 | 5   | 167      | 4.23165   | Wilcoxon | 2546     | 1.81422   | Brown-Forsythe |
| PKL     | AT2G25170 | 2   | 178      | 4.21388   | Wilcoxon | 1069     | 2.17219   | Brown-Forsythe |
| GA20OX2 | AT5G51810 | 5   | 191      | 4.16765   | Wilcoxon | 10266    | 1.30008   | Brown-Forsythe |
| DFL1    | AT5G54510 | 5   | 5        | 5.35688   | EMMA     | 2122     | 1.88922   | Brown-Forsythe |
| DDF1    | AT1G12610 | 1   | 31       | 4.31065   | EMMA     | 1394     | 2.06502   | Brown-Forsythe |
| VIP5    | AT1G61040 | 1   | 62       | 3.88562   | EMMA     | 2592     | 1.80652   | Brown-Forsythe |
| VRN2    | AT4G16845 | 4   | 74       | 3.873     | EMMA     | 1828     | 1.95372   | Brown-Forsythe |
| DFL2    | AT4G03400 | 4   | 93       | 3.71775   | EMMA     | 623      | 2.4259    | Brown-Forsythe |
| EMF1    | AT5G11530 | 5   | 103      | 3.65649   | EMMA     | 167      | 3.18733   | Brown-Forsythe |
| AGL15   | AT5G13790 | 5   | 109      | 3.60681   | EMMA     | 8798     | 1.35634   | Brown-Forsythe |
| LEP     | AT5G13910 | 5   | 109      | 3.60681   | EMMA     | 8798     | 1.35634   | Brown-Forsythe |
| LIP1    | AT5G64813 | 5   | 124      | 3.55111   | EMMA     | 7541     | 1.41006   | Brown-Forsythe |
| GIL1    | AT5G58960 | 5   | 125      | 3.54923   | EMMA     | 4002     | 1.63766   | Brown-Forsythe |

**Supplementary Table 70** - GWA (M) and vGWA (V) scores and ranks of trait 183: Trichome avg C

| Gene | Gene ID   | Chr | Rank (M) | Score (M) | Test (M) | Rank (V) | Score (V) | Test (V)       |
|------|-----------|-----|----------|-----------|----------|----------|-----------|----------------|
| TCL2 | AT2G30424 | 2   | 1        | 6.03849   | Wilcoxon | 6085     | 1.98674   | Brown-Forsythe |
| TCL1 | AT2G30432 | 2   | 1        | 6.03849   | Wilcoxon | 6085     | 1.98674   | Brown-Forsythe |
| ETC2 | AT2G30420 | 2   | 1        | 6.03849   | Wilcoxon | 4064     | 2.20327   | Brown-Forsythe |
| ACD6 | AT4G14400 | 4   | 66       | 4.63223   | Wilcoxon | 2111     | 2.56886   | Brown-Forsythe |
| TTG1 | AT5G24520 | 5   | 107      | 4.45996   | Wilcoxon | 3129     | 2.35108   | Brown-Forsythe |
| HDG9 | AT5G17320 | 5   | 133      | 4.3383    | Wilcoxon | 675      | 3.24627   | Brown-Forsythe |
| CPC  | AT2G46410 | 2   | 284      | 4.0376    | Wilcoxon | 1609     | 2.72076   | Brown-Forsythe |
| ELC  | AT3G12400 | 3   | 402      | 3.87148   | Wilcoxon | 836      | 3.0924    | Brown-Forsythe |
| TCL2 | AT2G30424 | 2   | 6        | 4.75326   | EMMA     | 6085     | 1.98674   | Brown-Forsythe |
| TCL1 | AT2G30432 | 2   | 6        | 4.75326   | EMMA     | 6085     | 1.98674   | Brown-Forsythe |
| ETC2 | AT2G30420 | 2   | 6        | 4.75326   | EMMA     | 4064     | 2.20327   | Brown-Forsythe |
| RHL2 | AT5G02820 | 5   | 103      | 3.24969   | EMMA     | 1928     | 2.61223   | Brown-Forsythe |
| ACD6 | AT4G14400 | 4   | 123      | 3.19616   | EMMA     | 2111     | 2.56886   | Brown-Forsythe |
| HDG1 | AT3G61150 | 3   | 219      | 2.92683   | EMMA     | 882      | 3.06287   | Brown-Forsythe |
| STI  | AT2G02480 | 2   | 253      | 2.86963   | EMMA     | 3762     | 2.24372   | Brown-Forsythe |
| GL1  | AT3G27920 | 3   | 259      | 2.85844   | EMMA     | 142      | 4.23851   | Brown-Forsythe |
| TTG1 | AT5G24520 | 5   | 469      | 2.59518   | EMMA     | 3129     | 2.35108   | Brown-Forsythe |

**Supplementary Table 71** - GWA (M) and vGWA (V) scores and ranks of trait 184: Trichome avg JA

| Gene    | Gene ID   | Chr | Rank (M) | Score (M) | Test (M) | Rank (V) | Score (V) | Test (V)       |
|---------|-----------|-----|----------|-----------|----------|----------|-----------|----------------|
| TCL2    | AT2G30424 | 2   | 3        | 6.44673   | Wilcoxon | 7902     | 1.74515   | Brown-Forsythe |
| TCL1    | AT2G30432 | 2   | 3        | 6.44673   | Wilcoxon | 7902     | 1.74515   | Brown-Forsythe |
| ETC2    | AT2G30420 | 2   | 3        | 6.44673   | Wilcoxon | 7902     | 1.74515   | Brown-Forsythe |
| ETC3    | AT4G01060 | 4   | 5        | 6.28312   | Wilcoxon | 380      | 3.30902   | Brown-Forsythe |
| HDG9    | AT5G17320 | 5   | 120      | 4.52655   | Wilcoxon | 1839     | 2.4655    | Brown-Forsythe |
| ACD6    | AT4G14400 | 4   | 174      | 4.40995   | Wilcoxon | 4225     | 2.04613   | Brown-Forsythe |
| TTG1    | AT5G24520 | 5   | 187      | 4.35215   | Wilcoxon | 4840     | 1.98879   | Brown-Forsythe |
| ELC     | AT3G12400 | 3   | 359      | 4.00356   | Wilcoxon | 5003     | 1.97207   | Brown-Forsythe |
| KINESIN | AT3G16630 | 3   | 450      | 3.87782   | Wilcoxon | 15480    | 1.41409   | Brown-Forsythe |
| TCL2    | AT2G30424 | 2   | 1        | 7.28113   | EMMA     | 7902     | 1.74515   | Brown-Forsythe |
| TCL1    | AT2G30432 | 2   | 1        | 7.28113   | EMMA     | 7902     | 1.74515   | Brown-Forsythe |
| ETC2    | AT2G30420 | 2   | 1        | 7.28113   | EMMA     | 7902     | 1.74515   | Brown-Forsythe |
| ETC3    | AT4G01060 | 4   | 30       | 4.16251   | EMMA     | 380      | 3.30902   | Brown-Forsythe |
| KINESIN | AT3G16630 | 3   | 55       | 3.70109   | EMMA     | 15480    | 1.41409   | Brown-Forsythe |
| TTG1    | AT5G24520 | 5   | 154      | 3.17772   | EMMA     | 4840     | 1.98879   | Brown-Forsythe |
| GL1     | AT3G27920 | 3   | 213      | 3.02522   | EMMA     | 6312     | 1.85371   | Brown-Forsythe |
| RHL2    | AT5G02820 | 5   | 220      | 3.01372   | EMMA     | 21909    | 1.24395   | Brown-Forsythe |
| HDG9    | AT5G17320 | 5   | 239      | 2.97729   | EMMA     | 1839     | 2.4655    | Brown-Forsythe |
| KLK     | AT5G18410 | 5   | 277      | 2.90741   | EMMA     | 3028     | 2.21072   | Brown-Forsythe |



**Supplementary Table 72** - GWA (M) and vGWA (V) scores and ranks of trait 185: Aphid number

| Gene      | Gene ID   | Chr | Rank (M) | Score (M) | Test (M) | Rank (V) | Score (V) | Test (V)       |
|-----------|-----------|-----|----------|-----------|----------|----------|-----------|----------------|
| IMS1      | AT1G74040 | 1   | 1        | 4.15926   | Wilcoxon | 3565     | 1.69682   | Brown-Forsythe |
| MOS2      | AT1G33520 | 1   | 3        | 4.02606   | Wilcoxon | 955      | 2.26378   | Brown-Forsythe |
| AT4G16990 | AT4G16990 | 4   | 10       | 3.77507   | Wilcoxon | 1567     | 2.03517   | Brown-Forsythe |
| MAM3      | AT5G23020 | 5   | 47       | 3.25185   | Wilcoxon | 1196     | 2.15197   | Brown-Forsythe |
| NPR1      | AT1G64280 | 1   | 167      | 2.85258   | Wilcoxon | 5854     | 1.49756   | Brown-Forsythe |
| NIMIN-2   | AT3G25882 | 3   | 402      | 2.53541   | Wilcoxon | 215      | 3.17022   | Brown-Forsythe |
| MAM1      | AT5G23010 | 5   | 439      | 2.5144    | Wilcoxon | 1196     | 2.15197   | Brown-Forsythe |
| MOS2      | AT1G33520 | 1   | 7        | 4.17368   | EMMA     | 955      | 2.26378   | Brown-Forsythe |
| IMS1      | AT1G74040 | 1   | 9        | 4.11427   | EMMA     | 3565     | 1.69682   | Brown-Forsythe |
| AT4G16990 | AT4G16990 | 4   | 20       | 3.84907   | EMMA     | 1567     | 2.03517   | Brown-Forsythe |
| MAM3      | AT5G23020 | 5   | 62       | 3.307     | EMMA     | 1196     | 2.15197   | Brown-Forsythe |
| NIMIN-2   | AT3G25882 | 3   | 132      | 3.05833   | EMMA     | 215      | 3.17022   | Brown-Forsythe |
| ATMYC2    | AT1G32640 | 1   | 308      | 2.71974   | EMMA     | 2726     | 1.79943   | Brown-Forsythe |
| CYP83A1   | AT4G13770 | 4   | 327      | 2.70766   | EMMA     | 29       | 4.05282   | Brown-Forsythe |
| ATTPS03   | AT4G16740 | 4   | 345      | 2.68785   | EMMA     | 1169     | 2.16164   | Brown-Forsythe |
| AT5G51630 | AT5G51630 | 5   | 410      | 2.61498   | EMMA     | 750      | 2.39705   | Brown-Forsythe |
| AT3G28740 | AT3G28740 | 3   | 500      | 2.54324   | EMMA     | 129      | 3.57823   | Brown-Forsythe |

**Supplementary Table 73** - GWA (M) and vGWA (V) scores and ranks of trait 186: Bacterial titer

| Gene      | Gene ID   | Chr | Rank (M) | Score (M) | Test (M) | Rank (V) | Score (V) | Test (V)       |
|-----------|-----------|-----|----------|-----------|----------|----------|-----------|----------------|
| ATMPK6    | AT2G43790 | 2   | 35       | 5.11922   | Wilcoxon | 13993    | 1.47872   | Brown-Forsythe |
| AT5G44870 | AT5G44870 | 5   | 105      | 4.57335   | Wilcoxon | 9011     | 1.69118   | Brown-Forsythe |
| SSI2      | AT2G43710 | 2   | 109      | 4.55281   | Wilcoxon | 1516     | 2.55933   | Brown-Forsythe |
| AT5G67160 | AT5G67160 | 5   | 119      | 4.5348    | Wilcoxon | 1646     | 2.51655   | Brown-Forsythe |
| PEN2      | AT2G44490 | 2   | 181      | 4.50298   | Wilcoxon | 1313     | 2.6287    | Brown-Forsythe |
| AT1G31540 | AT1G31540 | 1   | 192      | 4.45531   | Wilcoxon | 469      | 3.10452   | Brown-Forsythe |
| AT4G19530 | AT4G19530 | 4   | 223      | 4.37942   | Wilcoxon | 641      | 2.95146   | Brown-Forsythe |
| AT4G13880 | AT4G13880 | 4   | 259      | 4.30514   | Wilcoxon | 4009     | 2.08002   | Brown-Forsythe |
| AT2G17050 | AT2G17050 | 2   | 264      | 4.29739   | Wilcoxon | 7932     | 1.75247   | Brown-Forsythe |
| AT2G17055 | AT2G17055 | 2   | 266      | 4.2833    | Wilcoxon | 7932     | 1.75247   | Brown-Forsythe |
| AT4G19530 | AT4G19530 | 4   | 25       | 4.04952   | EMMA     | 641      | 2.95146   | Brown-Forsythe |
| AT5G46270 | AT5G46270 | 5   | 54       | 3.64599   | EMMA     | 311      | 3.28777   | Brown-Forsythe |
| AT1G31540 | AT1G31540 | 1   | 84       | 3.49207   | EMMA     | 469      | 3.10452   | Brown-Forsythe |
| AT5G44870 | AT5G44870 | 5   | 91       | 3.47703   | EMMA     | 9011     | 1.69118   | Brown-Forsythe |
| AT5G35450 | AT5G35450 | 5   | 97       | 3.44027   | EMMA     | 8877     | 1.69867   | Brown-Forsythe |
| AT4G38700 | AT4G38700 | 4   | 104      | 3.38666   | EMMA     | 99       | 3.86278   | Brown-Forsythe |
| AT4G13880 | AT4G13880 | 4   | 121      | 3.34218   | EMMA     | 4009     | 2.08002   | Brown-Forsythe |
| ST        | AT2G03760 | 2   | 122      | 3.32311   | EMMA     | 624      | 2.96126   | Brown-Forsythe |
| AT5G27060 | AT5G27060 | 5   | 123      | 3.31858   | EMMA     | 664      | 2.94061   | Brown-Forsythe |

**Supplementary Table 74 - GWA (M) and vGWA (V) scores and ranks of trait 272: Seedling Growth**

| Gene        | Gene ID   | Chr | Rank (M) | Score (M) | Test (M) | Rank (V) | Score (V) | Test (V)       |
|-------------|-----------|-----|----------|-----------|----------|----------|-----------|----------------|
| TWD1        | AT3G21640 | 3   | 7        | 4.49477   | Wilcoxon | 712      | 2.25889   | Brown-Forsythe |
| ABH1        | AT2G13540 | 2   | 56       | 3.47779   | Wilcoxon | 1377     | 1.99501   | Brown-Forsythe |
| IAA7        | AT3G23050 | 3   | 61       | 3.4256    | Wilcoxon | 814      | 2.21392   | Brown-Forsythe |
| SHD         | AT4G24190 | 4   | 62       | 3.41825   | Wilcoxon | 2544     | 1.74173   | Brown-Forsythe |
| SLY1        | AT4G24210 | 4   | 62       | 3.41825   | Wilcoxon | 2544     | 1.74173   | Brown-Forsythe |
| ABA2        | AT1G52340 | 1   | 79       | 3.3408    | Wilcoxon | 4934     | 1.49356   | Brown-Forsythe |
| BIN4        | AT5G24630 | 5   | 95       | 3.25878   | Wilcoxon | 4811     | 1.50275   | Brown-Forsythe |
| SPT         | AT4G36930 | 4   | 146      | 3.0556    | Wilcoxon | 23085    | 0.9083    | Brown-Forsythe |
| CIP1        | AT5G41790 | 5   | 173      | 3.00128   | Wilcoxon | 4741     | 1.50776   | Brown-Forsythe |
| DAG1        | AT3G61850 | 3   | 194      | 2.93296   | Wilcoxon | 707      | 2.26189   | Brown-Forsythe |
| IAA7        | AT3G23050 | 3   | 17       | 4.10221   | EMMA     | 814      | 2.21392   | Brown-Forsythe |
| CAND1       | AT2G02560 | 2   | 19       | 4.0981    | EMMA     | 199      | 2.79259   | Brown-Forsythe |
| AGL31       | AT5G65050 | 5   | 25       | 4.01706   | EMMA     | 887      | 2.18008   | Brown-Forsythe |
| NUA         | AT1G79280 | 1   | 46       | 3.61854   | EMMA     | 4569     | 1.52074   | Brown-Forsythe |
| sim-to-LSH1 | AT3G04510 | 3   | 56       | 3.54362   | EMMA     | 2008     | 1.84016   | Brown-Forsythe |
| LIP1        | AT5G64813 | 5   | 58       | 3.52199   | EMMA     | 11369    | 1.17483   | Brown-Forsythe |
| BIN4        | AT5G24630 | 5   | 62       | 3.4735    | EMMA     | 4811     | 1.50275   | Brown-Forsythe |
| ABA2        | AT1G52340 | 1   | 64       | 3.47115   | EMMA     | 4934     | 1.49356   | Brown-Forsythe |
| ABH1        | AT2G13540 | 2   | 66       | 3.46134   | EMMA     | 1377     | 1.99501   | Brown-Forsythe |
| SLY1        | AT4G24210 | 4   | 69       | 3.45162   | EMMA     | 2544     | 1.74173   | Brown-Forsythe |

**Supplementary Table 75 - GWA (M) and vGWA (V) scores and ranks of trait 273: Vern Growth**

| Gene        | Gene ID   | Chr | Rank (M) | Score (M) | Test (M) | Rank (V) | Score (V) | Test (V)       |
|-------------|-----------|-----|----------|-----------|----------|----------|-----------|----------------|
| SPT         | AT4G36930 | 4   | 2        | 4.55017   | Wilcoxon | 78       | 3.76633   | Brown-Forsythe |
| sim-to-DRM1 | AT2G33830 | 2   | 23       | 3.51761   | Wilcoxon | 20879    | 1.06264   | Brown-Forsythe |
| IMB1        | AT2G34900 | 2   | 96       | 3.0418    | Wilcoxon | 3462     | 1.868     | Brown-Forsythe |
| AT1G54070   | AT1G54070 | 1   | 132      | 2.93044   | Wilcoxon | 347      | 3.01069   | Brown-Forsythe |
| ABI1        | AT4G26080 | 4   | 140      | 2.89996   | Wilcoxon | 1858     | 2.16679   | Brown-Forsythe |
| EMS1        | AT5G07280 | 5   | 153      | 2.8754    | Wilcoxon | 11126    | 1.34195   | Brown-Forsythe |
| SPT         | AT4G36930 | 4   | 1        | 6.87733   | EMMA     | 78       | 3.76633   | Brown-Forsythe |
| ELF8        | AT2G06210 | 2   | 9        | 4.12721   | EMMA     | 271      | 3.13137   | Brown-Forsythe |
| EER5        | AT2G19560 | 2   | 19       | 3.80692   | EMMA     | 237      | 3.17178   | Brown-Forsythe |
| TWD1        | AT3G21640 | 3   | 37       | 3.64544   | EMMA     | 14       | 4.55211   | Brown-Forsythe |
| EIR1        | AT5G57090 | 5   | 42       | 3.59043   | EMMA     | 11       | 4.63103   | Brown-Forsythe |
| YAP169      | AT5G07200 | 5   | 50       | 3.50462   | EMMA     | 10258    | 1.38057   | Brown-Forsythe |
| ATS3        | AT5G07190 | 5   | 50       | 3.50462   | EMMA     | 10258    | 1.38057   | Brown-Forsythe |
| AT1G54070   | AT1G54070 | 1   | 60       | 3.4876    | EMMA     | 347      | 3.01069   | Brown-Forsythe |
| MSI1        | AT5G58230 | 5   | 64       | 3.47149   | EMMA     | 224      | 3.2008    | Brown-Forsythe |
| ZFP1        | AT1G80730 | 1   | 80       | 3.4151    | EMMA     | 1421     | 2.3175    | Brown-Forsythe |

**Supplementary Table 76** - GWA (M) and vGWA (V) scores and ranks of trait 274: After Vern Growth

| Gene  | Gene ID   | Chr | Rank (M) | Score (M) | Test (M) | Rank (V) | Score (V) | Test (V)       |
|-------|-----------|-----|----------|-----------|----------|----------|-----------|----------------|
| ATS3  | AT5G07190 | 5   | 7        | 4.11622   | Wilcoxon | 4233     | 1.64064   | Brown-Forsythe |
| VIN3  | AT5G57380 | 5   | 23       | 3.53972   | Wilcoxon | 4244     | 1.63846   | Brown-Forsythe |
| CLV2  | AT1G65380 | 1   | 29       | 3.44251   | Wilcoxon | 249      | 2.84795   | Brown-Forsythe |
| GA4H  | AT1G80340 | 1   | 30       | 3.44061   | Wilcoxon | 910      | 2.24929   | Brown-Forsythe |
| FUS6  | AT3G61140 | 3   | 36       | 3.36984   | Wilcoxon | 853      | 2.28131   | Brown-Forsythe |
| SPT   | AT4G36930 | 4   | 42       | 3.34915   | Wilcoxon | 15       | 4.03004   | Brown-Forsythe |
| AHG2  | AT1G55870 | 1   | 60       | 3.19901   | Wilcoxon | 1160     | 2.14298   | Brown-Forsythe |
| ABA2  | AT1G52340 | 1   | 64       | 3.18473   | Wilcoxon | 2167     | 1.9058    | Brown-Forsythe |
| FUS3  | AT3G26790 | 3   | 74       | 3.11408   | Wilcoxon | 1441     | 2.05853   | Brown-Forsythe |
| CIP1  | AT5G41790 | 5   | 114      | 2.93266   | Wilcoxon | 4386     | 1.6288    | Brown-Forsythe |
| ATS3  | AT5G07190 | 5   | 2        | 5.10822   | EMMA     | 4233     | 1.64064   | Brown-Forsythe |
| SPT   | AT4G36930 | 4   | 4        | 4.77153   | EMMA     | 15       | 4.03004   | Brown-Forsythe |
| AP1   | AT1G69120 | 1   | 15       | 3.88694   | EMMA     | 1        | 5.84543   | Brown-Forsythe |
| ELF8  | AT2G06210 | 2   | 21       | 3.7115    | EMMA     | 2130     | 1.913     | Brown-Forsythe |
| ABA2  | AT1G52340 | 1   | 26       | 3.65243   | EMMA     | 2167     | 1.9058    | Brown-Forsythe |
| AHG2  | AT1G55870 | 1   | 35       | 3.58327   | EMMA     | 1160     | 2.14298   | Brown-Forsythe |
| FUS3  | AT3G26790 | 3   | 40       | 3.54669   | EMMA     | 1441     | 2.05853   | Brown-Forsythe |
| APRR5 | AT5G24470 | 5   | 48       | 3.45903   | EMMA     | 1637     | 2.01339   | Brown-Forsythe |
| SPA3  | AT3G15354 | 3   | 53       | 3.35717   | EMMA     | 237      | 2.86411   | Brown-Forsythe |
| SPL5  | AT3G15270 | 3   | 53       | 3.35717   | EMMA     | 237      | 2.86411   | Brown-Forsythe |

**Supplementary Table 77** - GWA (M) and vGWA (V) scores and ranks of trait 277: Secondary Dormancy

| Gene        | Gene ID   | Chr | Rank (M) | Score (M) | Test (M) | Rank (V) | Score (V) | Test (V)       |
|-------------|-----------|-----|----------|-----------|----------|----------|-----------|----------------|
| CUL4        | AT5G46210 | 5   | 1        | 6.84223   | Wilcoxon | 478      | 4.05293   | Brown-Forsythe |
| PIN5        | AT5G16530 | 5   | 7        | 5.80704   | Wilcoxon | 120      | 5.11431   | Brown-Forsythe |
| AT3G29970   | AT3G29970 | 3   | 17       | 5.32313   | Wilcoxon | 300      | 4.45006   | Brown-Forsythe |
| SMZ         | AT3G54990 | 3   | 50       | 4.91147   | Wilcoxon | 1058     | 3.53925   | Brown-Forsythe |
| RGA1        | AT2G01570 | 2   | 68       | 4.79768   | Wilcoxon | 595      | 3.90128   | Brown-Forsythe |
| VRN5        | AT3G24440 | 3   | 74       | 4.73996   | Wilcoxon | 116      | 5.12407   | Brown-Forsythe |
| MAF5        | AT5G65080 | 5   | 113      | 4.5054    | Wilcoxon | 61       | 5.56908   | Brown-Forsythe |
| EMS1        | AT5G07280 | 5   | 163      | 4.33035   | Wilcoxon | 1138     | 3.49157   | Brown-Forsythe |
| GA1         | AT4G02780 | 4   | 195      | 4.24459   | Wilcoxon | 395      | 4.1927    | Brown-Forsythe |
| CIPK3       | AT2G26980 | 2   | 210      | 4.21064   | Wilcoxon | 1017     | 3.55579   | Brown-Forsythe |
| GA4         | AT1G15550 | 1   | 6        | 4.42936   | EMMA     | 18155    | 1.59808   | Brown-Forsythe |
| CUL4        | AT5G46210 | 5   | 15       | 3.95779   | EMMA     | 478      | 4.05293   | Brown-Forsythe |
| CIPK3       | AT2G26980 | 2   | 40       | 3.62182   | EMMA     | 1017     | 3.55579   | Brown-Forsythe |
| sim-to-FRL2 | AT5G27230 | 5   | 58       | 3.47661   | EMMA     | 2440     | 2.97076   | Brown-Forsythe |
| AT1G56220   | AT1G56220 | 1   | 78       | 3.37052   | EMMA     | 2842     | 2.86873   | Brown-Forsythe |
| SEPALLATA3  | AT1G24260 | 1   | 89       | 3.32306   | EMMA     | 6454     | 2.29785   | Brown-Forsythe |
| HY5         | AT5G11260 | 5   | 93       | 3.30501   | EMMA     | 142      | 4.9614    | Brown-Forsythe |
| VRN5        | AT3G24440 | 3   | 96       | 3.29316   | EMMA     | 116      | 5.12407   | Brown-Forsythe |
| SPA1        | AT2G46340 | 2   | 101      | 3.26845   | EMMA     | 741      | 3.74326   | Brown-Forsythe |
| AT3G29970   | AT3G29970 | 3   | 110      | 3.2306    | EMMA     | 300      | 4.45006   | Brown-Forsythe |

**Supplementary Table 78** - GWA (M) and vGWA (V) scores and ranks of trait 278: Germ in dark

| Gene      | Gene ID   | Chr | Rank (M) | Score (M) | Test (M) | Rank (V) | Score (V) | Test (V)       |
|-----------|-----------|-----|----------|-----------|----------|----------|-----------|----------------|
| RCI2B     | AT3G05890 | 3   | 18       | 5.25646   | Wilcoxon | 60       | 4.91711   | Brown-Forsythe |
| VRN5      | AT3G24440 | 3   | 42       | 4.80407   | Wilcoxon | 3660     | 2.44051   | Brown-Forsythe |
| ELF8      | AT2G06210 | 2   | 43       | 4.79027   | Wilcoxon | 2839     | 2.62626   | Brown-Forsythe |
| GA1       | AT4G02780 | 4   | 49       | 4.70829   | Wilcoxon | 4434     | 2.30181   | Brown-Forsythe |
| SHP2      | AT2G42830 | 2   | 52       | 4.67725   | Wilcoxon | 1157     | 3.25256   | Brown-Forsythe |
| DFL2      | AT4G03400 | 4   | 60       | 4.62212   | Wilcoxon | 3499     | 2.46945   | Brown-Forsythe |
| TEL1      | AT3G26120 | 3   | 81       | 4.45089   | Wilcoxon | 10633    | 1.72155   | Brown-Forsythe |
| PIN3      | AT1G70940 | 1   | 95       | 4.34536   | Wilcoxon | 3366     | 2.4998    | Brown-Forsythe |
| HAB1      | AT1G72770 | 1   | 121      | 4.19497   | Wilcoxon | 14555    | 1.5157    | Brown-Forsythe |
| HAP2C     | AT1G72830 | 1   | 121      | 4.19497   | Wilcoxon | 11985    | 1.63948   | Brown-Forsythe |
| DWF1      | AT3G19820 | 3   | 30       | 4.65885   | EMMA     | 2474     | 2.72223   | Brown-Forsythe |
| SHP2      | AT2G42830 | 2   | 42       | 4.01552   | EMMA     | 1157     | 3.25256   | Brown-Forsythe |
| VRN5      | AT3G24440 | 3   | 47       | 3.89569   | EMMA     | 3660     | 2.44051   | Brown-Forsythe |
| ELF4      | AT2G40080 | 2   | 49       | 3.87479   | EMMA     | 5823     | 2.1119    | Brown-Forsythe |
| DFL2      | AT4G03400 | 4   | 55       | 3.82547   | EMMA     | 3499     | 2.46945   | Brown-Forsythe |
| VIN3      | AT5G57380 | 5   | 57       | 3.80704   | EMMA     | 1531     | 3.06734   | Brown-Forsythe |
| TEL1      | AT3G26120 | 3   | 93       | 3.52172   | EMMA     | 10633    | 1.72155   | Brown-Forsythe |
| PIF3      | AT1G09530 | 1   | 159      | 3.20315   | EMMA     | 1876     | 2.92593   | Brown-Forsythe |
| AT2G33830 | AT2G33830 | 2   | 162      | 3.1966    | EMMA     | 3651     | 2.44199   | Brown-Forsythe |
| DOG1      | AT5G45830 | 5   | 172      | 3.1607    | EMMA     | 266      | 4.11905   | Brown-Forsythe |

**Supplementary Table 79** - GWA (M) and vGWA (V) scores and ranks of trait 279: DSDS50

| Gene     | Gene ID   | Chr | Rank (M) | Score (M) | Test (M) | Rank (V) | Score (V) | Test (V)       |
|----------|-----------|-----|----------|-----------|----------|----------|-----------|----------------|
| COMATOSE | AT4G39850 | 4   | 32       | 6.31068   | Wilcoxon | 6548     | 1.78083   | Brown-Forsythe |
| ELF4     | AT2G40080 | 2   | 53       | 6.00096   | Wilcoxon | 1824     | 2.45201   | Brown-Forsythe |
| HBT      | AT2G20000 | 2   | 62       | 5.92629   | Wilcoxon | 203      | 4.00536   | Brown-Forsythe |
| CYCD4;1  | AT5G65420 | 5   | 71       | 5.88552   | Wilcoxon | 2048     | 2.38593   | Brown-Forsythe |
| DFL2     | AT4G03400 | 4   | 107      | 5.65344   | Wilcoxon | 3526     | 2.10047   | Brown-Forsythe |
| ATS3     | AT5G07190 | 5   | 111      | 5.62377   | Wilcoxon | 3613     | 2.08875   | Brown-Forsythe |
| EMS1     | AT5G07280 | 5   | 151      | 5.46186   | Wilcoxon | 984      | 2.82227   | Brown-Forsythe |
| ATMYB65  | AT3G11440 | 3   | 156      | 5.46076   | Wilcoxon | 211      | 3.98381   | Brown-Forsythe |
| ATRAB28  | AT1G03120 | 1   | 170      | 5.37576   | Wilcoxon | 3925     | 2.04223   | Brown-Forsythe |
| FLC      | AT5G10140 | 5   | 190      | 5.2813    | Wilcoxon | 4829     | 1.94188   | Brown-Forsythe |
| ELF4     | AT2G40080 | 2   | 18       | 4.35971   | EMMA     | 1824     | 2.45201   | Brown-Forsythe |
| IAA6     | AT1G52830 | 1   | 91       | 3.54974   | EMMA     | 23       | 5.58665   | Brown-Forsythe |
| PKL      | AT2G25170 | 2   | 98       | 3.50137   | EMMA     | 683      | 3.09265   | Brown-Forsythe |
| HY2      | AT3G09150 | 3   | 111      | 3.39456   | EMMA     | 1152     | 2.73275   | Brown-Forsythe |
| FRS1     | AT4G19990 | 4   | 129      | 3.27598   | EMMA     | 193      | 4.05025   | Brown-Forsythe |
| COMATOSE | AT4G39850 | 4   | 158      | 3.15411   | EMMA     | 6548     | 1.78083   | Brown-Forsythe |
| DFL1     | AT5G54510 | 5   | 173      | 3.12085   | EMMA     | 4932     | 1.93257   | Brown-Forsythe |
| UVI4     | AT2G42260 | 2   | 188      | 3.07406   | EMMA     | 5961     | 1.83217   | Brown-Forsythe |
| DOG1     | AT5G45830 | 5   | 197      | 3.04985   | EMMA     | 4884     | 1.93836   | Brown-Forsythe |

**Supplementary Table 80** - GWA (M) and vGWA (V) scores and ranks of trait 280: Seed bank 133-91

| Gene        | Gene ID   | Chr | Rank (M) | Score (M) | Test (M) | Rank (V) | Score (V) | Test (V)       |
|-------------|-----------|-----|----------|-----------|----------|----------|-----------|----------------|
| ARR3        | AT1G59940 | 1   | 9        | 5.24948   | Wilcoxon | 11447    | 1.55733   | Brown-Forsythe |
| GRV2        | AT2G26890 | 2   | 15       | 4.92119   | Wilcoxon | 449      | 3.80359   | Brown-Forsythe |
| COL9        | AT3G07650 | 3   | 16       | 4.91378   | Wilcoxon | 6556     | 1.8833    | Brown-Forsythe |
| GASA4       | AT5G15230 | 5   | 21       | 4.81076   | Wilcoxon | 3905     | 2.20801   | Brown-Forsythe |
| EPR1        | AT1G18330 | 1   | 26       | 4.74926   | Wilcoxon | 2317     | 2.53716   | Brown-Forsythe |
| ATGA2OX8    | AT4G21200 | 4   | 48       | 4.50613   | Wilcoxon | 712      | 3.43567   | Brown-Forsythe |
| EER5        | AT2G19560 | 2   | 58       | 4.37476   | Wilcoxon | 12199    | 1.52606   | Brown-Forsythe |
| SPK-2-2     | AT3G50500 | 3   | 60       | 4.34696   | Wilcoxon | 60       | 4.34696   | Brown-Forsythe |
| HY1         | AT2G26670 | 2   | 69       | 4.30587   | Wilcoxon | 2281     | 2.54941   | Brown-Forsythe |
| ELF5        | AT5G62640 | 5   | 96       | 4.15025   | Wilcoxon | 2131     | 2.60209   | Brown-Forsythe |
| AP1         | AT1G69120 | 1   | 1        | 4.87018   | EMMA     | 9574     | 1.6558    | Brown-Forsythe |
| PHYD        | AT4G16250 | 4   | 42       | 3.69464   | EMMA     | 1673     | 2.7899    | Brown-Forsythe |
| RGL3        | AT5G17490 | 5   | 63       | 3.55835   | EMMA     | 7690     | 1.78398   | Brown-Forsythe |
| FVE         | AT2G19520 | 2   | 76       | 3.48837   | EMMA     | 10917    | 1.58187   | Brown-Forsythe |
| VRN2        | AT4G16845 | 4   | 89       | 3.42541   | EMMA     | 247      | 4.36104   | Brown-Forsythe |
| sim-to-NPH4 | AT2G03070 | 2   | 146      | 3.21059   | EMMA     | 1077     | 3.14519   | Brown-Forsythe |
| ABI5        | AT2G36270 | 2   | 149      | 3.20396   | EMMA     | 69       | 5.90485   | Brown-Forsythe |
| EER5        | AT2G19560 | 2   | 155      | 3.19319   | EMMA     | 12199    | 1.52606   | Brown-Forsythe |
| AT4G21540   | AT4G21540 | 4   | 160      | 3.1833    | EMMA     | 9313     | 1.67212   | Brown-Forsythe |
| DFL2        | AT4G03400 | 4   | 161      | 3.18163   | EMMA     | 2235     | 2.56563   | Brown-Forsythe |

**Supplementary Table 81** - GWA (M) and vGWA (V) scores and ranks of trait 281: Storage 7 days

| Gene      | Gene ID   | Chr | Rank (M) | Score (M) | Test (M) | Rank (V) | Score (V) | Test (V)       |
|-----------|-----------|-----|----------|-----------|----------|----------|-----------|----------------|
| NCED9     | AT1G78390 | 1   | 41       | 5.87448   | Wilcoxon | 38       | 10.40402  | Brown-Forsythe |
| PHYB      | AT2G18790 | 2   | 54       | 5.73754   | Wilcoxon | 1394     | 4.98396   | Brown-Forsythe |
| SHY2      | AT1G04240 | 1   | 132      | 5.47282   | Wilcoxon | 1384     | 4.98966   | Brown-Forsythe |
| EMS1      | AT5G07280 | 5   | 137      | 5.46925   | Wilcoxon | 3029     | 3.9432    | Brown-Forsythe |
| COMATOSE  | AT4G39850 | 4   | 142      | 5.4688    | Wilcoxon | 44       | 10.07424  | Brown-Forsythe |
| LKP2      | AT2G18915 | 2   | 154      | 5.40765   | Wilcoxon | 599      | 6.21166   | Brown-Forsythe |
| ZFP1      | AT1G80730 | 1   | 155      | 5.40389   | Wilcoxon | 2551     | 4.18783   | Brown-Forsythe |
| DFL2      | AT4G03400 | 4   | 157      | 5.39549   | Wilcoxon | 3290     | 3.83806   | Brown-Forsythe |
| ATS3      | AT5G07190 | 5   | 164      | 5.35569   | Wilcoxon | 225      | 7.54102   | Brown-Forsythe |
| ABA1      | AT5G67030 | 5   | 173      | 5.31955   | Wilcoxon | 5275     | 3.25846   | Brown-Forsythe |
| NCED9     | AT1G78390 | 1   | 32       | 4.66173   | EMMA     | 38       | 10.40402  | Brown-Forsythe |
| EMF1      | AT5G11530 | 5   | 33       | 4.65738   | EMMA     | 32       | 10.73674  | Brown-Forsythe |
| VRN5      | AT3G24440 | 3   | 34       | 4.60894   | EMMA     | 833      | 5.7713    | Brown-Forsythe |
| FY        | AT5G13480 | 5   | 61       | 4.21009   | EMMA     | 480      | 6.43196   | Brown-Forsythe |
| HYL1      | AT1G09700 | 1   | 63       | 4.18653   | EMMA     | 3        | 15.14327  | Brown-Forsythe |
| FLC       | AT5G10140 | 5   | 66       | 4.15523   | EMMA     | 3609     | 3.73368   | Brown-Forsythe |
| TFL1      | AT5G03840 | 5   | 134      | 3.73271   | EMMA     | 1658     | 4.73216   | Brown-Forsythe |
| COMATOSE  | AT4G39850 | 4   | 177      | 3.55875   | EMMA     | 44       | 10.07424  | Brown-Forsythe |
| AT5G44300 | AT5G44300 | 5   | 232      | 3.39237   | EMMA     | 11852    | 2.35309   | Brown-Forsythe |
| DOG1      | AT5G45830 | 5   | 367      | 3.07196   | EMMA     | 2011     | 4.49863   | Brown-Forsythe |

**Supplementary Table 82** - GWA (M) and vGWA (V) scores and ranks of trait 282: Storage 28 days

| Gene      | Gene ID   | Chr | Rank (M) | Score (M) | Test (M) | Rank (V) | Score (V) | Test (V)       |
|-----------|-----------|-----|----------|-----------|----------|----------|-----------|----------------|
| COMATOSE  | AT4G39850 | 4   | 21       | 6.20501   | Wilcoxon | 36       | 7.2343    | Brown-Forsythe |
| ATMYB65   | AT3G11440 | 3   | 23       | 6.17584   | Wilcoxon | 2275     | 3.53521   | Brown-Forsythe |
| SPA4      | AT1G53090 | 1   | 26       | 6.10511   | Wilcoxon | 1113     | 4.21423   | Brown-Forsythe |
| ELF4      | AT2G40080 | 2   | 37       | 6.01469   | Wilcoxon | 321      | 5.32299   | Brown-Forsythe |
| ATGID1B   | AT3G63010 | 3   | 38       | 6.00612   | Wilcoxon | 168      | 5.88431   | Brown-Forsythe |
| AGL15     | AT5G13790 | 5   | 41       | 5.9587    | Wilcoxon | 1239     | 4.10387   | Brown-Forsythe |
| IMB1      | AT2G34900 | 2   | 56       | 5.82535   | Wilcoxon | 2334     | 3.5106    | Brown-Forsythe |
| DFL2      | AT4G03400 | 4   | 70       | 5.7262    | Wilcoxon | 9465     | 2.38169   | Brown-Forsythe |
| PGI1      | AT4G24620 | 4   | 75       | 5.69726   | Wilcoxon | 19       | 8.20662   | Brown-Forsythe |
| EMS1      | AT5G07280 | 5   | 100      | 5.62778   | Wilcoxon | 1060     | 4.25541   | Brown-Forsythe |
| FLC       | AT5G10140 | 5   | 2        | 5.89834   | EMMA     | 17       | 8.30546   | Brown-Forsythe |
| ACT7      | AT5G09810 | 5   | 15       | 4.46862   | EMMA     | 191      | 5.69628   | Brown-Forsythe |
| ZFP1      | AT1G80730 | 1   | 17       | 4.37073   | EMMA     | 261      | 5.48581   | Brown-Forsythe |
| IMB1      | AT2G34900 | 2   | 50       | 3.80453   | EMMA     | 2334     | 3.5106    | Brown-Forsythe |
| AT5G01560 | AT5G01560 | 5   | 52       | 3.78542   | EMMA     | 516      | 4.97408   | Brown-Forsythe |
| NCED9     | AT1G78390 | 1   | 79       | 3.52273   | EMMA     | 2688     | 3.39209   | Brown-Forsythe |
| GIL1      | AT5G58960 | 5   | 87       | 3.47038   | EMMA     | 1972     | 3.66482   | Brown-Forsythe |
| ELF5      | AT5G62640 | 5   | 109      | 3.36139   | EMMA     | 2356     | 3.50021   | Brown-Forsythe |
| PKS2      | AT1G14280 | 1   | 149      | 3.20885   | EMMA     | 4163     | 3.02765   | Brown-Forsythe |
| PSD       | AT1G72560 | 1   | 153      | 3.20207   | EMMA     | 25       | 7.65891   | Brown-Forsythe |

**Supplementary Table 83** - GWA (M) and vGWA (V) scores and ranks of trait 283: Storage 56 days

| Gene     | Gene ID   | Chr | Rank (M) | Score (M) | Test (M) | Rank (V) | Score (V) | Test (V)       |
|----------|-----------|-----|----------|-----------|----------|----------|-----------|----------------|
| HBT      | AT2G20000 | 2   | 31       | 6.39096   | Wilcoxon | 2634     | 4.12965   | Brown-Forsythe |
| FLC      | AT5G10140 | 5   | 33       | 6.29298   | Wilcoxon | 965      | 5.58238   | Brown-Forsythe |
| AGL15    | AT5G13790 | 5   | 46       | 5.95613   | Wilcoxon | 15       | 9.57402   | Brown-Forsythe |
| ATGID1B  | AT3G63010 | 3   | 60       | 5.76202   | Wilcoxon | 74       | 8.34573   | Brown-Forsythe |
| COMATOSE | AT4G39850 | 4   | 62       | 5.73333   | Wilcoxon | 39       | 8.97004   | Brown-Forsythe |
| ATMYB65  | AT3G11440 | 3   | 67       | 5.69039   | Wilcoxon | 304      | 7.22187   | Brown-Forsythe |
| IMB1     | AT2G34900 | 2   | 77       | 5.57797   | Wilcoxon | 815      | 5.92912   | Brown-Forsythe |
| ELF4     | AT2G40080 | 2   | 86       | 5.56102   | Wilcoxon | 2        | 10.36637  | Brown-Forsythe |
| AGL20    | AT2G45660 | 2   | 94       | 5.50112   | Wilcoxon | 1220     | 5.26641   | Brown-Forsythe |
| ATS3     | AT5G07190 | 5   | 95       | 5.49346   | Wilcoxon | 24       | 9.10971   | Brown-Forsythe |
| FLC      | AT5G10140 | 5   | 8        | 4.37042   | EMMA     | 965      | 5.58238   | Brown-Forsythe |
| LBA1     | AT5G47010 | 5   | 16       | 4.15566   | EMMA     | 7427     | 2.75259   | Brown-Forsythe |
| ZFP1     | AT1G80730 | 1   | 22       | 4.05406   | EMMA     | 791      | 5.98748   | Brown-Forsythe |
| DDF1     | AT1G12610 | 1   | 29       | 3.95268   | EMMA     | 4827     | 3.31738   | Brown-Forsythe |
| KNAT3    | AT5G25220 | 5   | 37       | 3.84108   | EMMA     | 1901     | 4.54614   | Brown-Forsythe |
| PKL      | AT2G25170 | 2   | 41       | 3.80086   | EMMA     | 6852     | 2.85854   | Brown-Forsythe |
| GA1      | AT4G02780 | 4   | 67       | 3.51887   | EMMA     | 2049     | 4.49337   | Brown-Forsythe |
| IAA6     | AT1G52830 | 1   | 76       | 3.42835   | EMMA     | 443      | 6.7722    | Brown-Forsythe |
| HBT      | AT2G20000 | 2   | 79       | 3.40602   | EMMA     | 2634     | 4.12965   | Brown-Forsythe |
| COL9     | AT3G07650 | 3   | 88       | 3.36822   | EMMA     | 1993     | 4.52936   | Brown-Forsythe |

# A Brief Tutorial of the R Package vGWAS

## Setup

To use the **vGWAS** package, of course, an R environment is required. Visit:

<http://www.r-project.org>

and install R for the operating system.

Start R and in the R console, type the following command to install the package:

```
install.packages('vGWAS', repos = 'http://r-forge.r-project.org')
```

If everything works fine, something like the following should show:

```
trying URL ...
Content type ... length ... bytes (... Kb)
opened URL
```

```
=====
```

```
downloaded ... Kb
```

Now the package is installed in the R library.

## Example

In the R console, the command:

```
vignette('vGWAS')
```

opens this PDF document together with the package documentation. An example can be found in the documentation. Type:

```
require(vGWAS)
```

to load the package (two depended packages **hglm** and **dglm** are required to be installed as well), then four main functions in the package are ready to use - **brown.forsythe.test**, **vGWAS**, **vGWAS.heva**, **p1ot** (S3 method for vGWAS object) and **vGWAS.variance**. Run the following commands to load the example data:

```
data(pheno)
```

```
data(geno)
```

```
data(chr)
```

```
data(map)
```

pheno is a numeric vector of the simulated phenotypic values. By running:

```
hist(pheno, breaks = 30, density = 15, col = 'darkred')
```

a histogram of the phenotype distribution is produced as Figure 1.

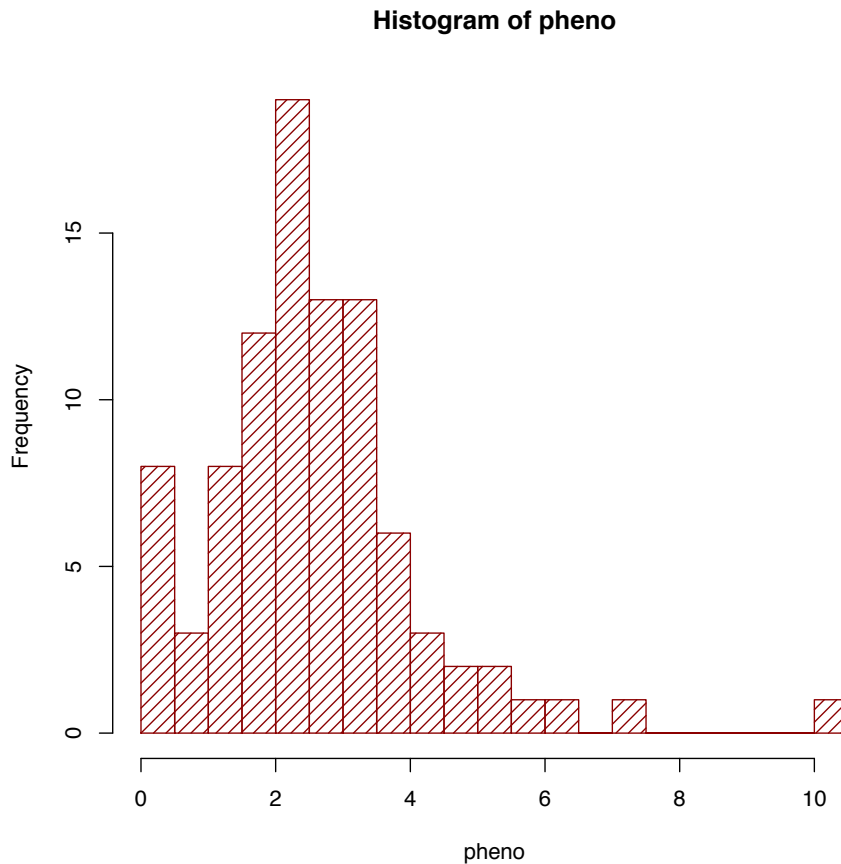

**Figure 1: Histogram of the simulated phenotype.**

The command:

```
table(chr)
```

produces:

```
chr
 1  2  3  4  5
5000 3000 4000 2000 6000
```

This shows exactly the number of markers on each of the five simulated chromosomes. Now, the *objects* loaded in R are ready for a vGWA scan, which can be done using the single command:

```
vgwa <- vGWAS(phenotype = pheno, geno.matrix = geno, marker.map = map,
              chr.index = chr)
```

A progress bar will show to indicate the progress of the scan, such like:

```
|===
```

```
| 4%
```



When the scan is finished, all the output statistics will be returned as a *list* into the object `vgwa`, which belongs to the *class* 'vGWAS'. Any object that has a *structure* belonging to class 'vGWAS' can be directly passed into S3 method function `plot`. For instance, simply run the following command, we can plot the results in `vgwa`:

```
plot(vgwa)
```

which produces Figure 2. There is a clear peak above the Bonferroni corrected threshold (dashed orange line).

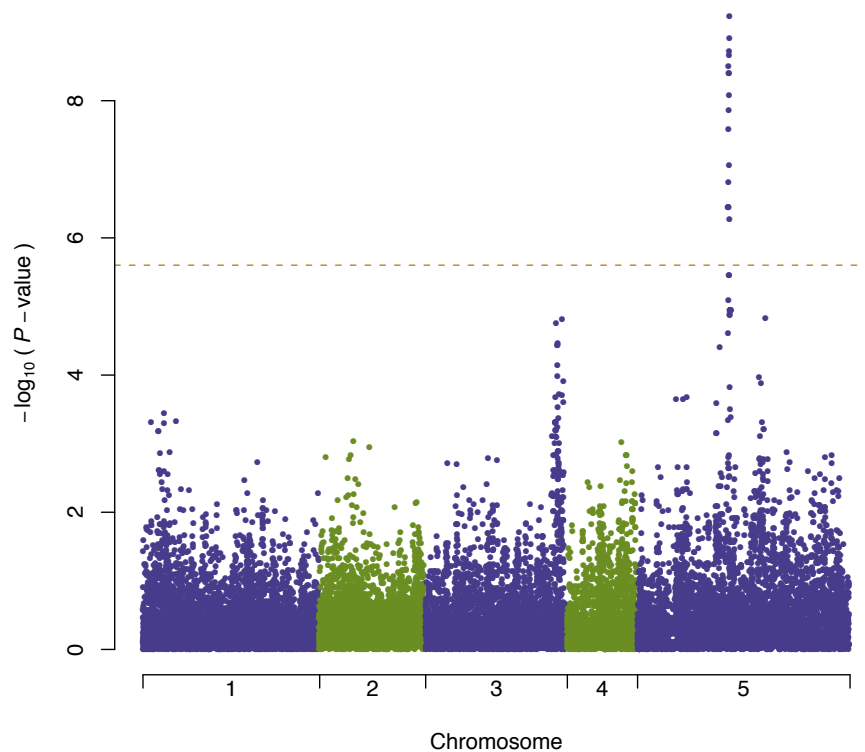

**Figure 2: vGWAS results of the simulated data.**

Regarding the marker that gave the highest score, the heritability explained by the mean and variance can be split and calculated via:

```
vgwas.variance(phenotype = pheno,
               marker.genotype = geno[,vgwa$p.value == min(vgwa$p.value)])
```

which prints out:

```
variance explained by the mean part of model:
```

```
4.2 %, p-value = 0.1930359
```

```
variance explained by the variance part of model:
```

23.06 %, p-value = 7.922846e-12

variance explained in total:

27.26 %

The output can also be stored if assigning the function call to an object.

To correct for population confounding, the package is capable of applying genomic control to the obtained  $p$ -values. For instance, one can simply run:

```
vgwa2 <- vGWAS.gc(vgwa)
```

By default, this command takes all the obtained  $p$ -values for genomic control and plots the QQ plot as shown in Figure 3.

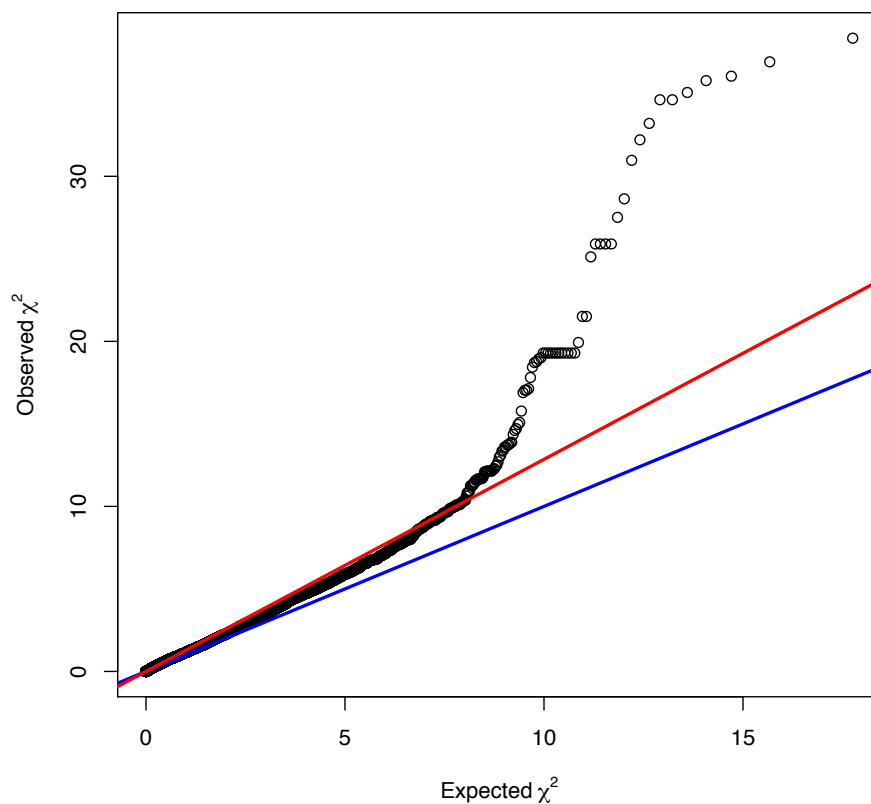

Figure 3: QQ plot for genomic control.

The estimated inflation ratio and its standard error are:

```
vgwa2$lambda
```

```
[1] 1.285152
```

```
vgwa2$lambda.se
```

```
[1] 0.002133788
```

Plotting the this object as follows will generate a new vGWAS plot in Figure 4.

```
plot(vgwa2, col.manhattan = c('darkmagenta', 'darkcyan'))
```

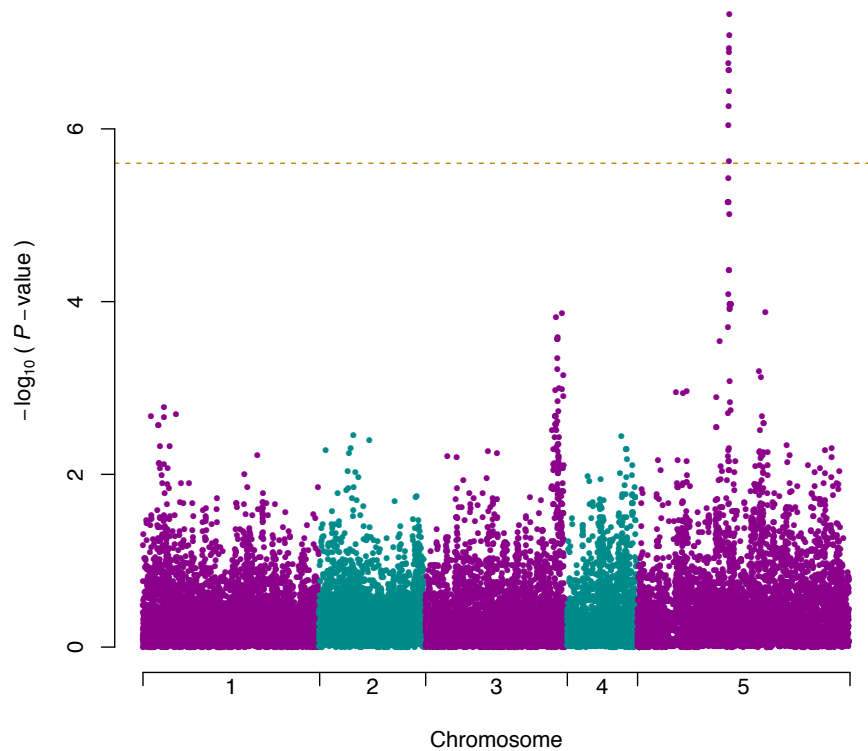

Figure 4: vGWAS results of the simulated data after genomic control.

---

## Remarks

The package source and further development information are on the R-Forge project page:  
<https://r-forge.r-project.org/projects/vgwas/>

# Package ‘vGWAS’

July 29, 2011

**Type** Package

**Title** Variance Genome-wide Association

**Version** 2011.07.25

**Date** 2011-07-25

**Author** Xia Shen

**Maintainer** Xia Shen <xia.shen@icm.uu.se>

**Description** The package provides models and tests for variance genome-wide association study (vGWAS).

**License** GPL

**LazyLoad** yes

**Depends** hglm, dglm

## R topics documented:

|                     |           |
|---------------------|-----------|
| vGWAS-package       | 2         |
| brown.forsythe.test | 3         |
| chr                 | 5         |
| geno                | 5         |
| map                 | 6         |
| pheno               | 6         |
| plot.vGWAS          | 7         |
| vGWAS               | 8         |
| vGWAS.gc            | 10        |
| vGWAS.variance      | 11        |
| <b>Index</b>        | <b>13</b> |

---

vGWAS-package

*Variance Genome-wide Association*

---

### **Description**

The package provides models and tests for variance genome-wide association study (vGWAS).

### **Details**

Package: vGWAS  
Type: Package  
Version: 2011.07.25  
Date: 2011-07-25  
License: GPL  
LazyLoad: yes  
Depends: hglm, dglm

### Author(s)

Xia Shen

Maintainer: Xia Shen <xia.shen@icm.uu.se>

### References

Shen, X., Pettersson, M., Ronnegard, L. and Carlborg, O. (2011): **Inheritance beyond plain heritability: variance-controlling genes in *Arabidopsis thaliana***. *Submitted*.

Ronnegard, L., Shen, X. and Alam, M. (2011): **hglm: A Package for Fitting Hierarchical Generalized Linear Models**. *The R Journal*, 2(2), 20-28.

Brown, M. B. and Forsythe, A.B. (1974). **Robust tests for equality of variances**. *Journal of the American Statistical Association*, 69, 364-367.

Levene, H. (1960). **Robust Tests for Equality of Variances**, in *Contributions to Probability and Statistics*, ed. I. Olkin, Palo Alto, CA: Stanford Univ. Press.

### See Also

R package lawstat for other types of nonparametric variance tests.

---

brown.forsythe.test

*Brown-Forsythe's Test of Equality of Variances*

---

### Description

The function performs the robust Brown-Forsythe test using the group medians. Instead of the ANOVA statistic, the Kruskal-Wallis ANOVA may also be applied using this function.

### Usage

```
brown.forsythe.test(y, group, kruskal.test=FALSE)
```

**Arguments**

`y` a numeric vector of data values.  
`group` factor of the data.  
`kruskal.test` a logical value specifying whether to use Kruskal-Wallis statistic. The default option is `FALSE`, i.e., the usual ANOVA statistic is used in place of Kruskal-Wallis statistic.

**Details**

Levene (1960) proposed a test for homogeneity of variances in  $k$  groups which is based on the ANOVA statistic applied to absolute deviations of observations from the corresponding group mean. The robust Brown-Forsythe version of the Levene-type test substitutes the group mean by the group median in the classical Levene statistic.

**Value**

A list with the following numeric components.

`statistic` the value of the test statistic.  
`p.value` the p-value of the test.  
`method` type of test performed.  
`data.name` a character string giving the name of the data.

**Acknowledgement**

The authors of package `lawstat` is acknowledged for their source code under free GPL license.

**Note**

Modified from the `lawstat` package.

**Author(s)**

Xia Shen

**References**

Brown, M. B. and Forsythe, A.B. (1974). **Robust tests for equality of variances**. *Journal of the American Statistical Association*, **69**, 364-367.

Levene, H. (1960). **Robust Tests for Equality of Variances**, in *Contributions to Probability and Statistics*, ed. I. Olkin, Palo Alto, CA: Stanford Univ. Press.

**Examples**

```
## Not run:

data(pheno)
data(geno)
brown.forsythe.test(pheno, geno[,911])

## End(Not run)
```

---

`chr`*Chromosome Indices for The Markers of The Simulated Data*

---

**Description**

Chromosome indices for the markers of the simulated data

**Usage**

```
data(chr)
```

**Format**

A numeric vector of chromosome indices for the 20K simulated markers.

**Examples**

```
data(chr)  
table(chr)
```

---

`geno`*The Marker Genotypes of The Simulated Data*

---

**Description**

The marker genotypes of the simulated data

**Usage**

```
data(geno)
```

**Format**

A character matrix of size (number of individuals) times (number of markers in the genome).

**Details**

Note that there is only one column for each marker.

**Examples**

```
data(geno)
```



---

map

*Map Positions for The Markers of The Simulated Data*

---

**Description**

Map positions for the markers of the simulated data

**Usage**

```
data(chr)
```

**Format**

A numeric vector of chromosomal map positions of the 20K simulated markers.

**Examples**

```
data(map)
```

---

pheno

*Phenotypic Values for The Markers of The Simulated Data*

---

**Description**

Phenotypic values for the markers of the simulated data

**Usage**

```
data(pheno)
```

**Format**

A numeric vector of the phenotypic values of 93 simulated individuals.

**Examples**

```
data(pheno)  
hist(pheno, breaks = 30)
```

---

`plot.vGWAS`*Variance GWA Manhattan Plot*

---

### Description

The function plots the variance GWA result for the giving scan object.

### Usage

```
## S3 method for class 'vGWAS'  
plot(x, sig.threshold = NULL, low.log.p = 0, pch = 16,  
      cex = 0.6, col.manhattan = c("slateblue4", "olivedrab"),  
      col.sig.threshold = "darkgoldenrod", ...)
```

### Arguments

|                                |                                                                                                                                                                        |
|--------------------------------|------------------------------------------------------------------------------------------------------------------------------------------------------------------------|
| <code>x</code>                 | a result object from vGWAS scan. It can be any list or data.frame that contains chromosome, marker.map, and p.value, with class = 'vGWAS'. See <a href="#">vGWAS</a> . |
| <code>sig.threshold</code>     | a numeric value giving the significance threshold for $-\log(pvalues, 10)$ . If NULL, Bonferroni correction will be used.                                              |
| <code>low.log.p</code>         | a numeric value giving the lower limit of the $-\log(pvalues, 10)$ to plot.                                                                                            |
| <code>pch</code>               | point character. See <a href="#">par</a> .                                                                                                                             |
| <code>cex</code>               | size of points. See <a href="#">par</a> .                                                                                                                              |
| <code>col.manhattan</code>     | two colors as a vector for the Manhattan plot.                                                                                                                         |
| <code>col.sig.threshold</code> | one color for the significance threshold.                                                                                                                              |
| <code>...</code>               | not used.                                                                                                                                                              |

### Value

a plot for viewing vGWAS result.

### Author(s)

Xia Shen

### References

Shen, X., Pettersson, M., Ronnegard, L. and Carlborg, O. (2011): **Inheritance beyond plain heritability: variance-controlling genes in *Arabidopsis thaliana***. *Submitted*.

### See Also

[vGWAS-package](#), [vGWAS](#)

**Examples**

```
## Not run:

# ----- load data ----- #

data(pheno)
data(geno)
data(chr)
data(map)

# ----- variance GWA scan ----- #

vgwa <- vGWAS(phenotype = pheno, geno.matrix = geno,
             marker.map = map, chr.index = chr)

# ----- visualize the scan ----- #

plot(vgwa)

# ----- calculate the variance explained by strongest the marker ----- #

vGWAS.heritability(phenotype = pheno,
                  marker.genotype = geno[,vgwa$p.value == min(vgwa$p.value)])

# ----- genomic control ----- #

vgwa2 <- vGWAS.gc(vgwa)

plot(vgwa2)

## End(Not run)
```

vGWAS

*Variance Genome-wide Association***Description**

Variance Genome-wide association for using nonparametric variance test

**Usage**

```
vGWAS(phenotype, geno.matrix, kruskal.test = FALSE,
      marker.map = NULL, chr.index = NULL)
```

**Arguments**

`phenotype` a numeric or logical vector of the phenotypic values. See **Examples**.

`geno.matrix` a matrix or `data.frame` with individuals as rows and markers as columns. The marker genotypes for each marker are coded as one column. See **Examples**.

`kruskal.test` a logical value specifying whether to use Kruskal-Wallis statistic. The default option is `FALSE`, i.e., the usual ANOVA statistic is used in place of Kruskal-Wallis statistic.

`marker.map` a numeric vector giving the marker map positions for each chromosome. See **Examples**.

`chr.index` a numeric vector giving the chromosome index for each marker. See **Examples**.

### Value

a `data.frame` containing columns of marker names, chromosome indices, `marker.map` positions, test statistic values, and `p.value` for each position.

### Author(s)

Xia Shen

### References

Shen, X., Pettersson, M., Ronnegard, L. and Carlborg, O. (2011): **Inheritance beyond plain heritability: variance-controlling genes in *Arabidopsis thaliana***. *Submitted*.

Ronnegard, L., Shen, X. and Alam, M. (2011): **hglim: A Package for Fitting Hierarchical Generalized Linear Models**. *The R Journal*, 2(2), 20-28.

### See Also

[vGWAS-package](#)

### Examples

```
## Not run:

# ----- load data ----- #

data(pheno)
data(geno)
data(chr)
data(map)

# ----- variance GWA scan ----- #

vgwa <- vGWAS(phenotype = pheno, geno.matrix = geno,
             marker.map = map, chr.index = chr)

# ----- visualize the scan ----- #

plot(vgwa)

# ----- calculate the variance explained by strongest the marker ----- #

vGWAS.variance(phenotype = pheno,
              marker.genotype = geno[,vgwa$p.value == min(vgwa$p.value)])

# ----- genomic control ----- #

vgwa2 <- vGWAS.gc(vgwa)
```

```
plot(vgwa2)
## End(Not run)
```

---

vGWAS.gc

*Genomic Control for vGWAS*

---

## Description

The function does genomic control for the variance GWA result object.

## Usage

```
vGWAS.gc(object, plot = TRUE, proportion = 1, ...)
```

## Arguments

|            |                                                                                                                      |
|------------|----------------------------------------------------------------------------------------------------------------------|
| object     | a result object from vGWAS scan. It can be any list or data.frame that contains p.value. See <a href="#">vGWAS</a> . |
| plot       | a logical value turning on/off the QQ plot for genomic control.                                                      |
| proportion | a numeric value between 0 and 1 giving the proportion of obtained p-values to be used for genomic control.           |
| ...        | not used.                                                                                                            |

## Value

|            |                                                  |
|------------|--------------------------------------------------|
| lambda     | estimated inflation ratio.                       |
| lambda.se  | standard error of the estimated inflation ratio. |
| gc.p.value | p-values after genomic control.                  |

## Author(s)

Xia Shen

## References

Shen, X., Pettersson, M., Ronnegard, L. and Carlborg, O. (2011): **Inheritance beyond plain heritability: variance-controlling genes in *Arabidopsis thaliana***. *Submitted*.

## See Also

[vGWAS-package](#), [vGWAS](#)

**Examples**

```
## Not run:

# ----- load data ----- #

data(pheno)
data(geno)
data(chr)
data(map)

# ----- variance GWA scan ----- #

vgwa <- vGWAS(phenotype = pheno, geno.matrix = geno,
             marker.map = map, chr.index = chr)

# ----- visualize the scan ----- #

plot(vgwa)

# ----- genomic control ----- #

vgwa2 <- vGWAS.gc(vgwa)

plot(vgwa2)

## End(Not run)
```

---

vGWAS.variance

*Calculating Variance Explained by A Single Marker*


---

**Description**

The function calculates and reports the variance explained for a single marker by fitting a double generalized linear model. It gives both the variance explained by the mean and variance parts of model.

**Usage**

```
vGWAS.variance(phenotype, marker.genotype, print = TRUE)
```

**Arguments**

`phenotype` a numeric vector of the phenotypic values. See **Examples**.

`marker.genotype` a numeric or character or factor vector of the genotypes of a single marker. See **Examples**.

`print` a logical value. If FALSE, the heritability values will be returned for storage.

**Details**

The **Value** will only be available if `only.print = FALSE`.

**Value**

variance.mean  
                                   the variance explained by the mean part of model.

variance.disp  
                                   the variance explained by the variance part of model.

**Author(s)**

Xia Shen

**References**

Shen, X., Pettersson, M., Ronnegard, L. and Carlborg, O. (2011): **Inheritance beyond plain heritability: variance-controlling genes in *Arabidopsis thaliana*.** *Submitted.*

**See Also**

[vGWAS-package](#), [vGWAS](#), [plot.vGWAS](#)

**Examples**

```
## Not run:

# ----- load data ----- #

data(pheno)
data(geno)
data(chr)
data(map)

# ----- variance GWA scan ----- #

vgwa <- vGWAS(phenotype = pheno, geno.matrix = geno,
              marker.map = map, chr.index = chr)

# ----- visualize the scan ----- #

plot(vgwa)

# ----- calculate the variance explained by strongest the marker ----- #

vGWAS.variance(phenotype = pheno,
               marker.genotype = geno[,vgwa$p.value == min(vgwa$p.value)])

## End(Not run)
```

# Index

## \*Topic **GWAS**

vGWAS-package, 2

## \*Topic **datasets**

pheno, 6

## \*Topic **htest**

brown.forsythe.test, 3

brown.forsythe.test, 3

chr, 5

geno, 5

map, 6

par, 7

pheno, 6

plot.vGWAS, 7, 12

vGWAS, 7, 8, 10, 12

vGWAS-package, 7, 9, 10, 12

vGWAS-package, 2

vGWAS.gc, 10

vGWAS.variance, 11
